# Supplementary material for: DNA-m6A calling and integrated long-read epigenetic and genetic analysis with fibertools
Source: HighWire-hosted journal article supplement (doi:10.1101/gr.279095.124), 2024-06-07

type 5mC DNA m6a NotTelo Telo

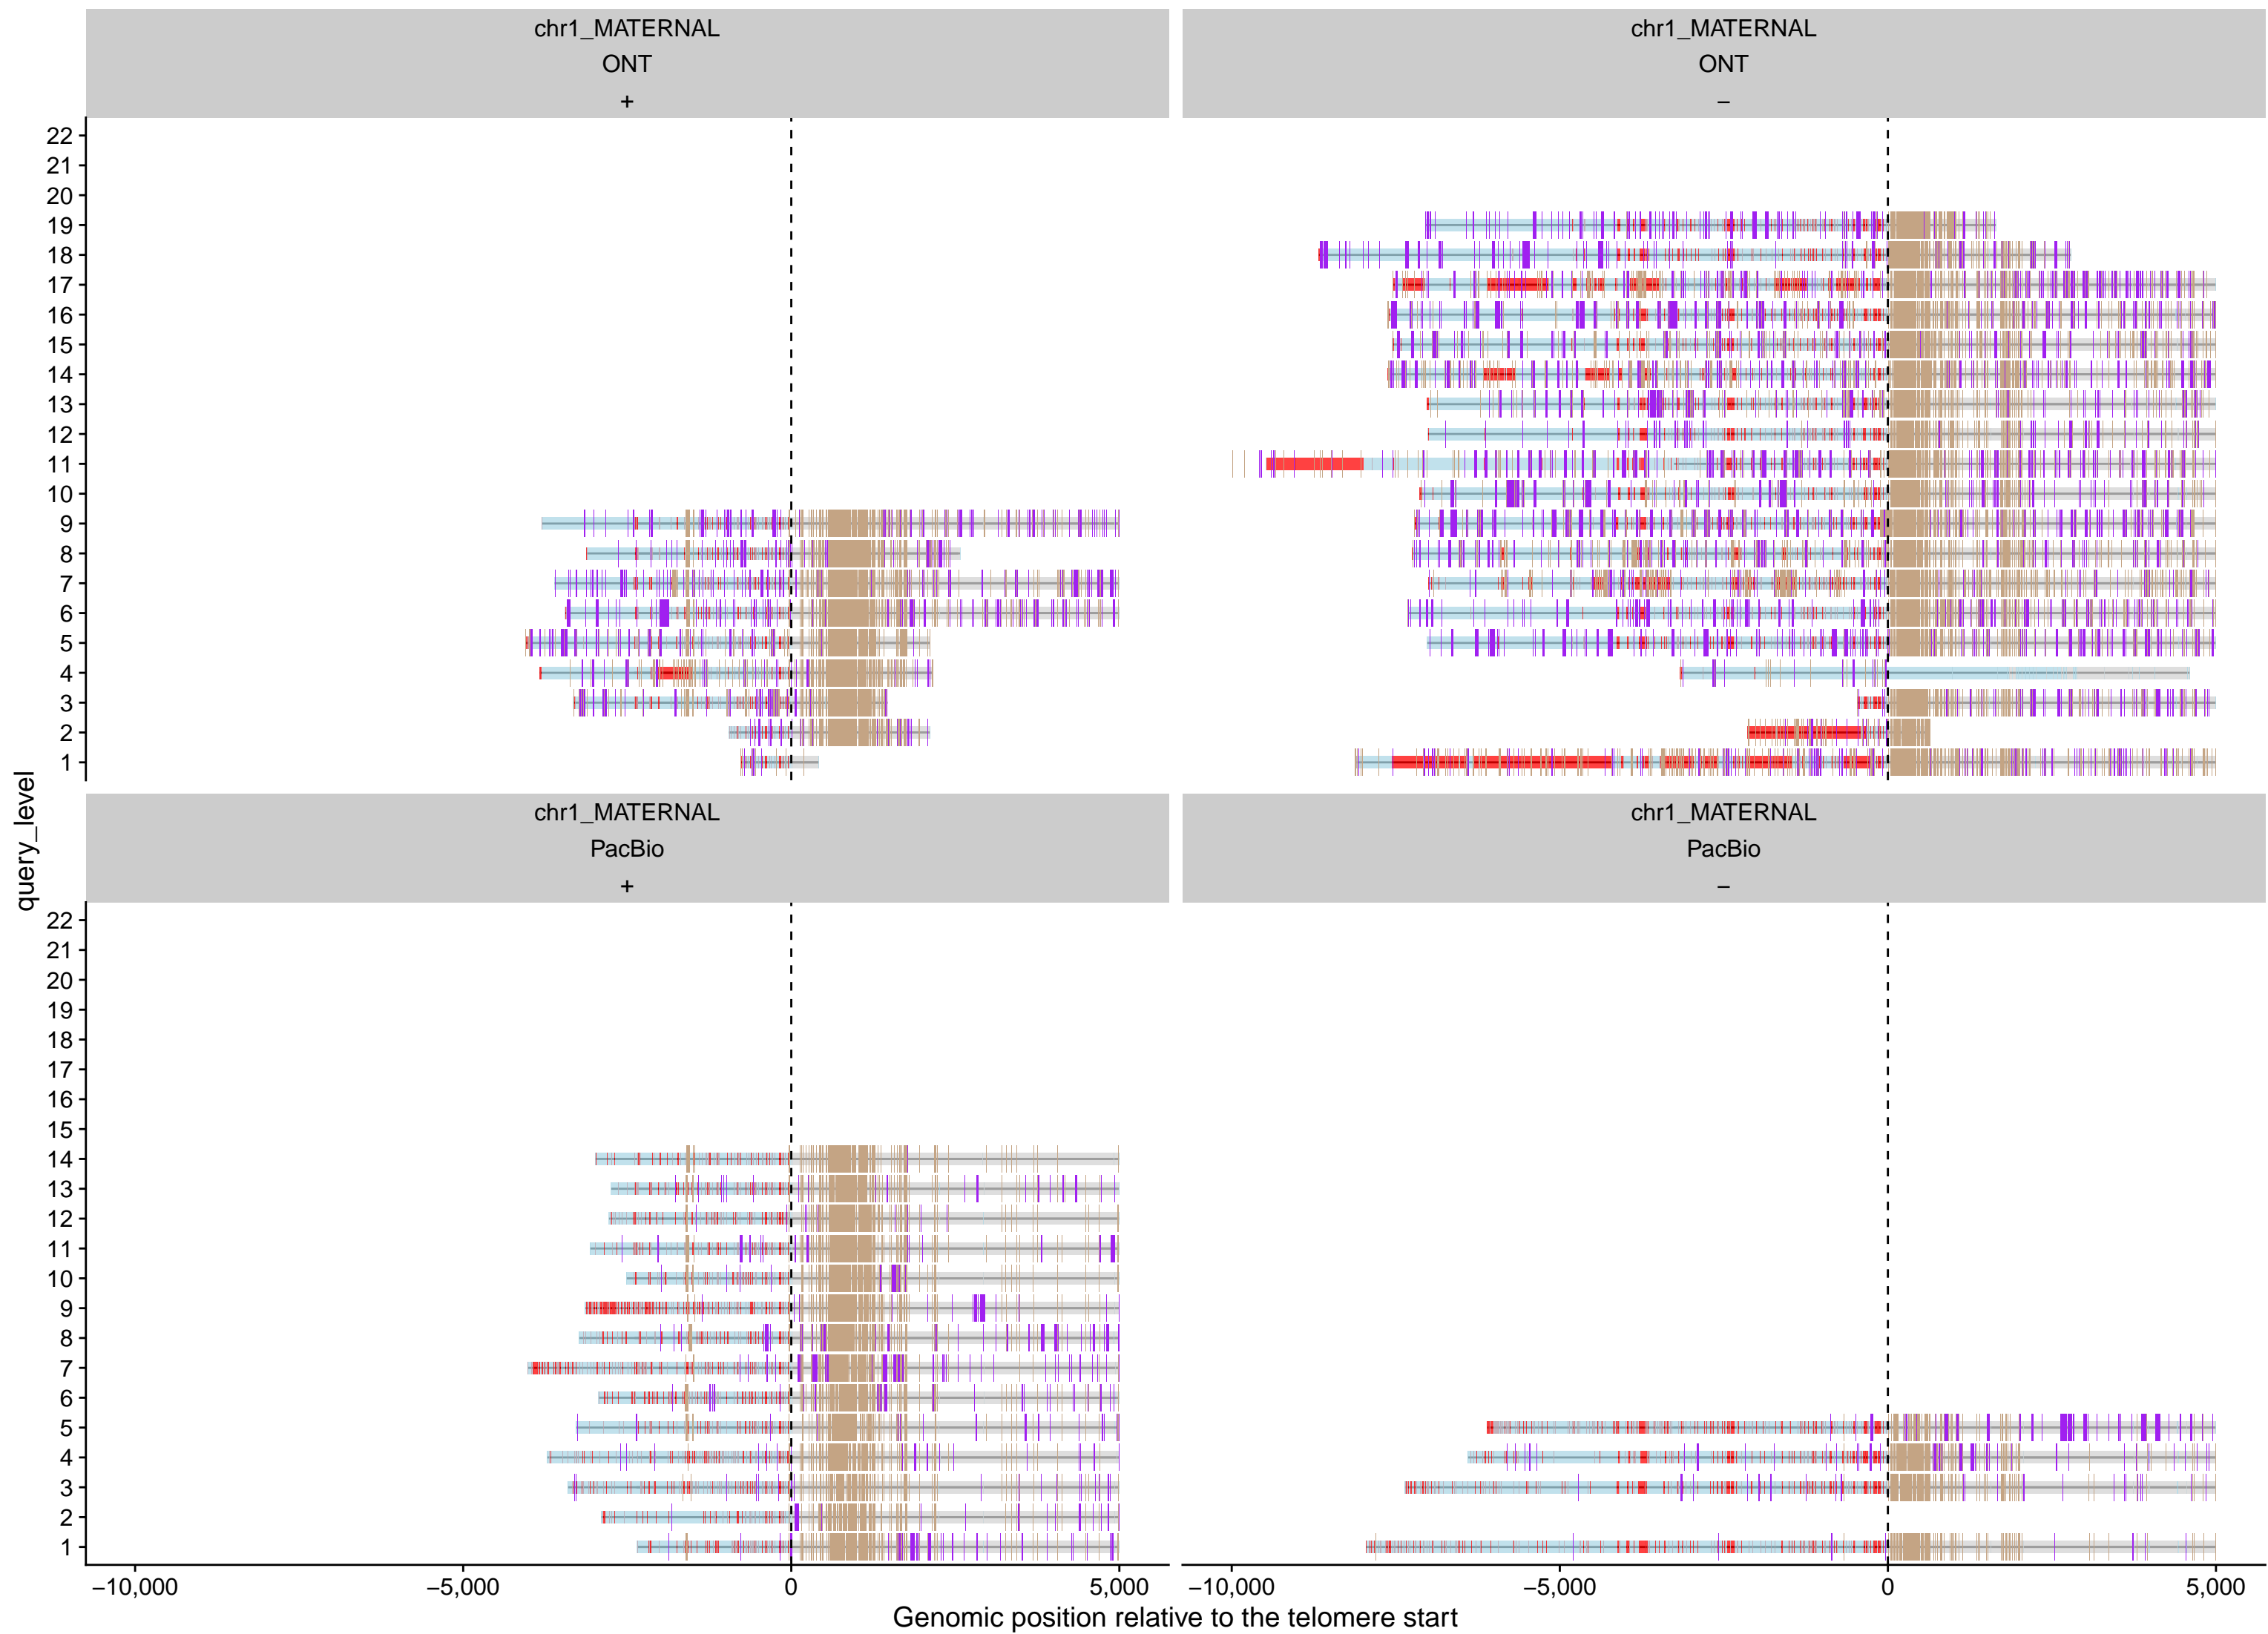

type 5mC DNA m6a NotTelo Telo

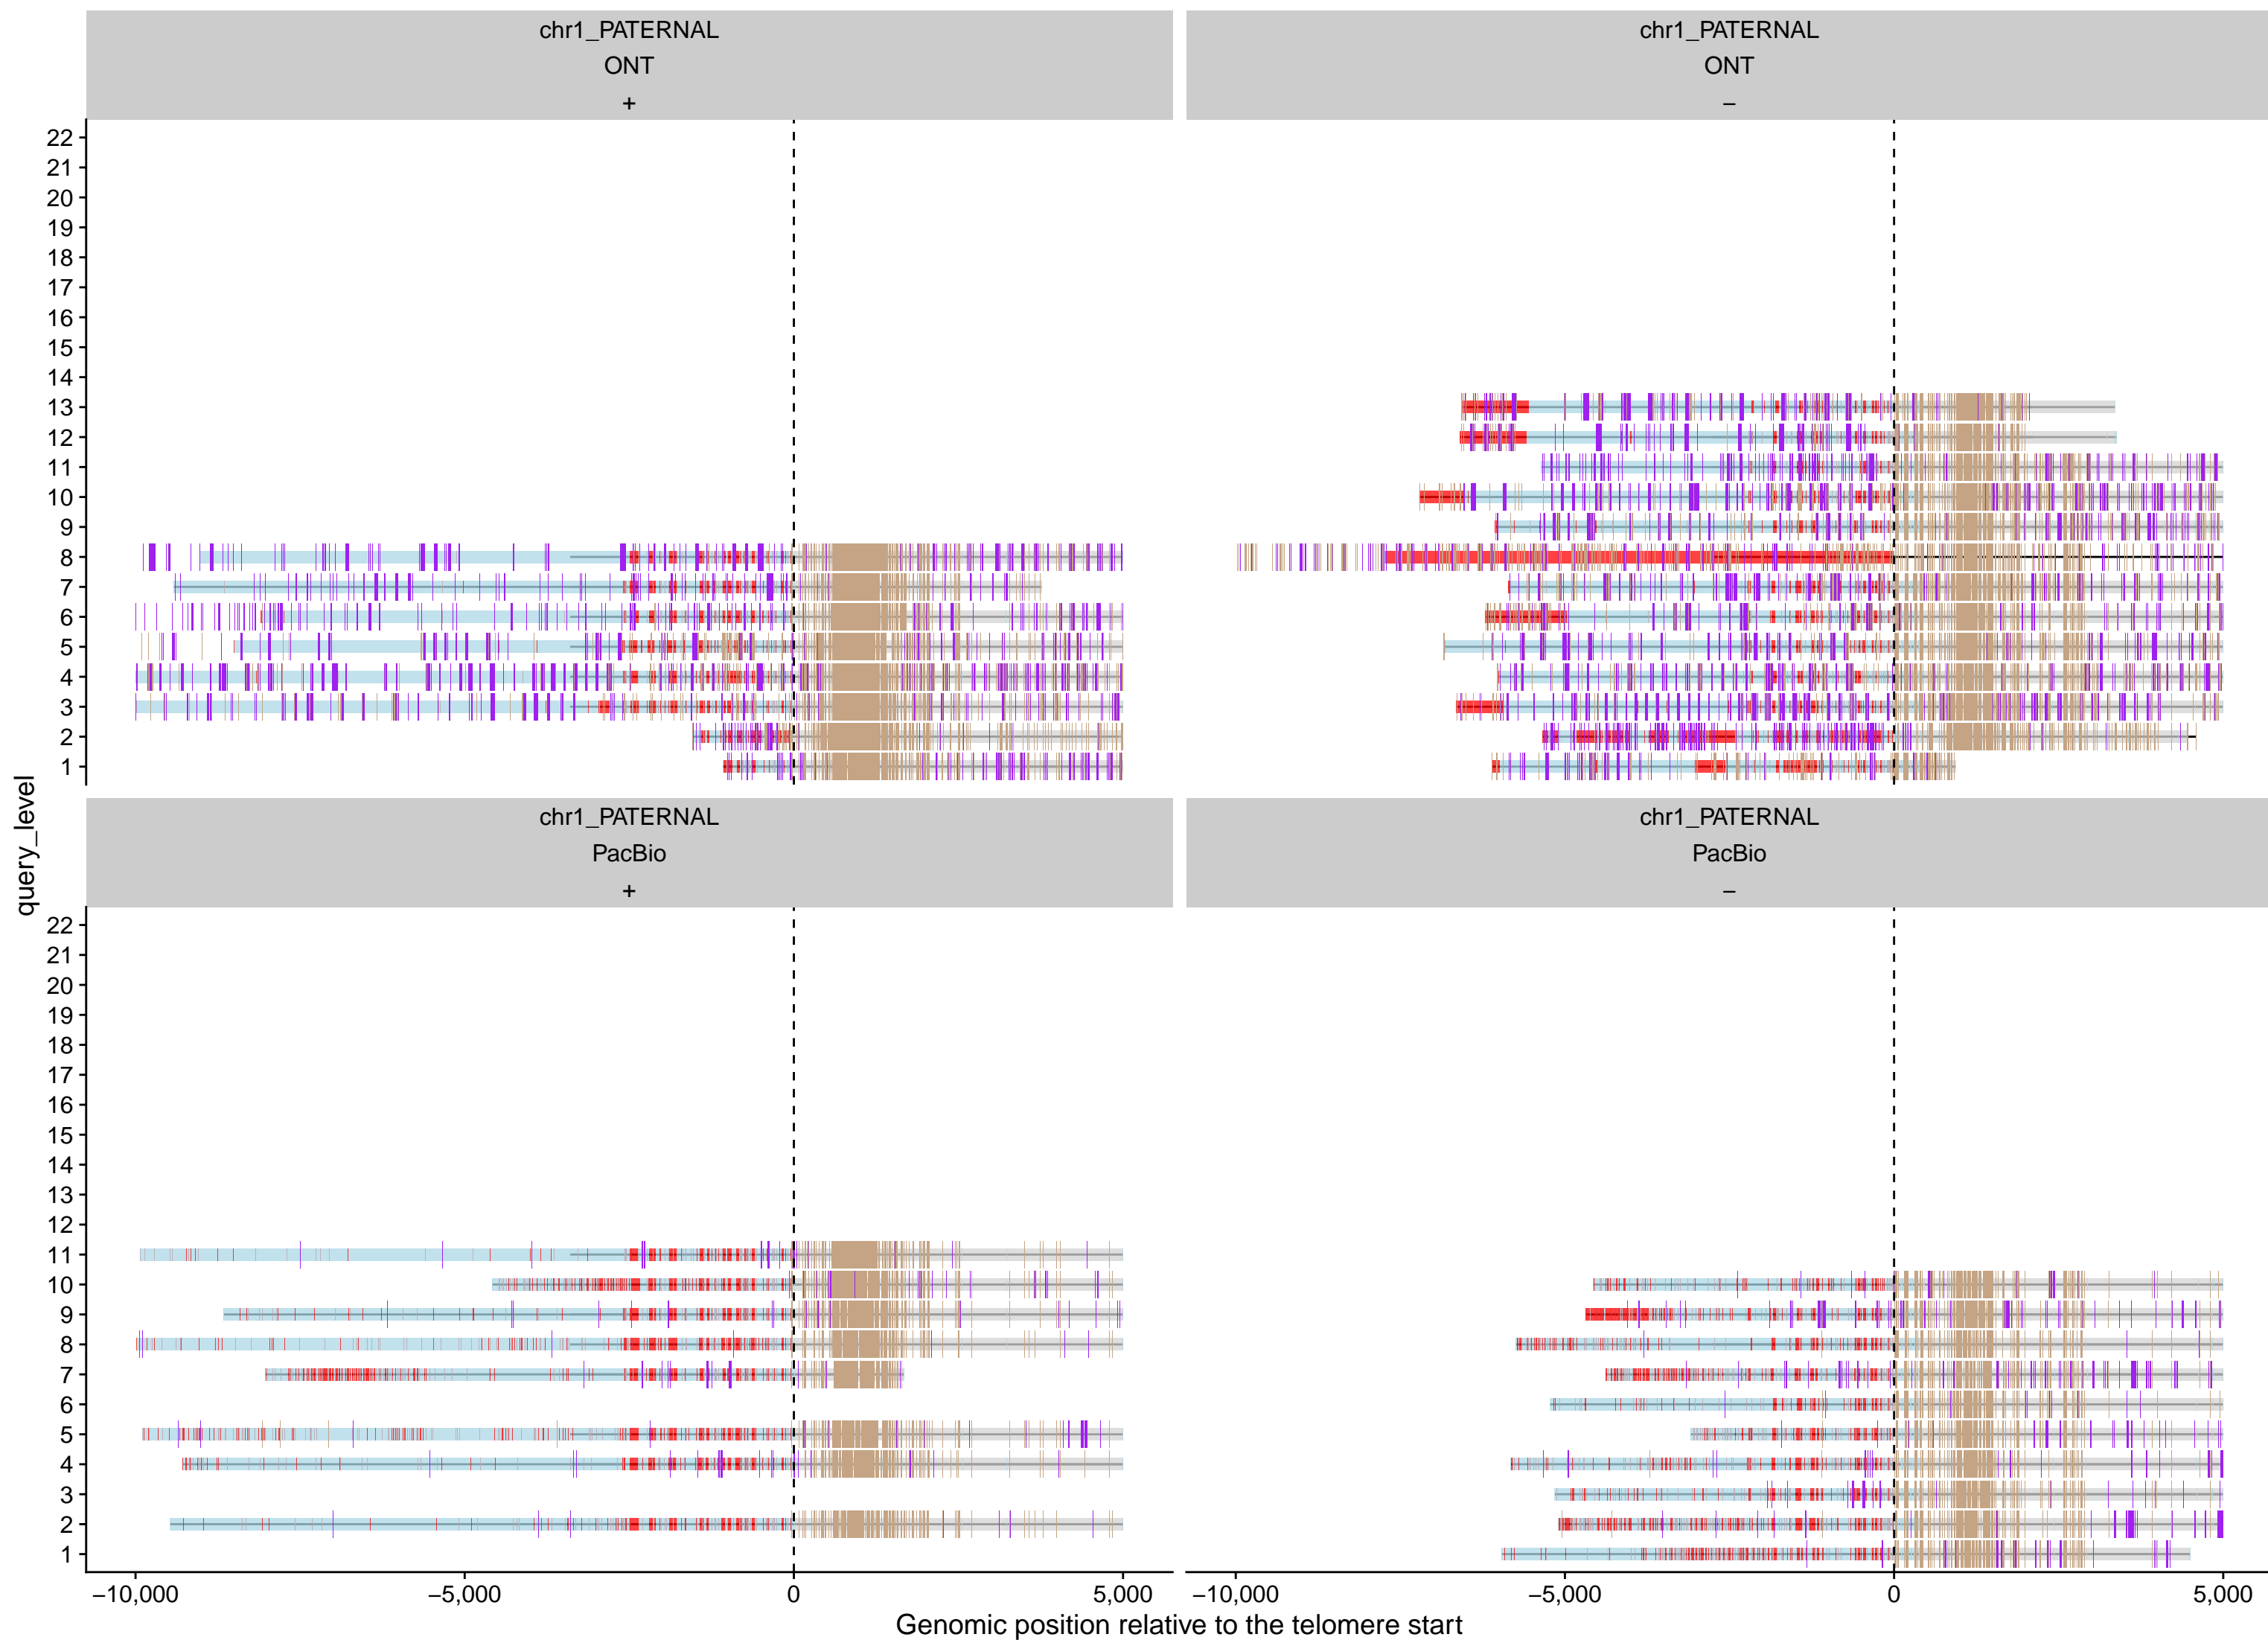

type 5mC DNA m6a NotTelo Telo

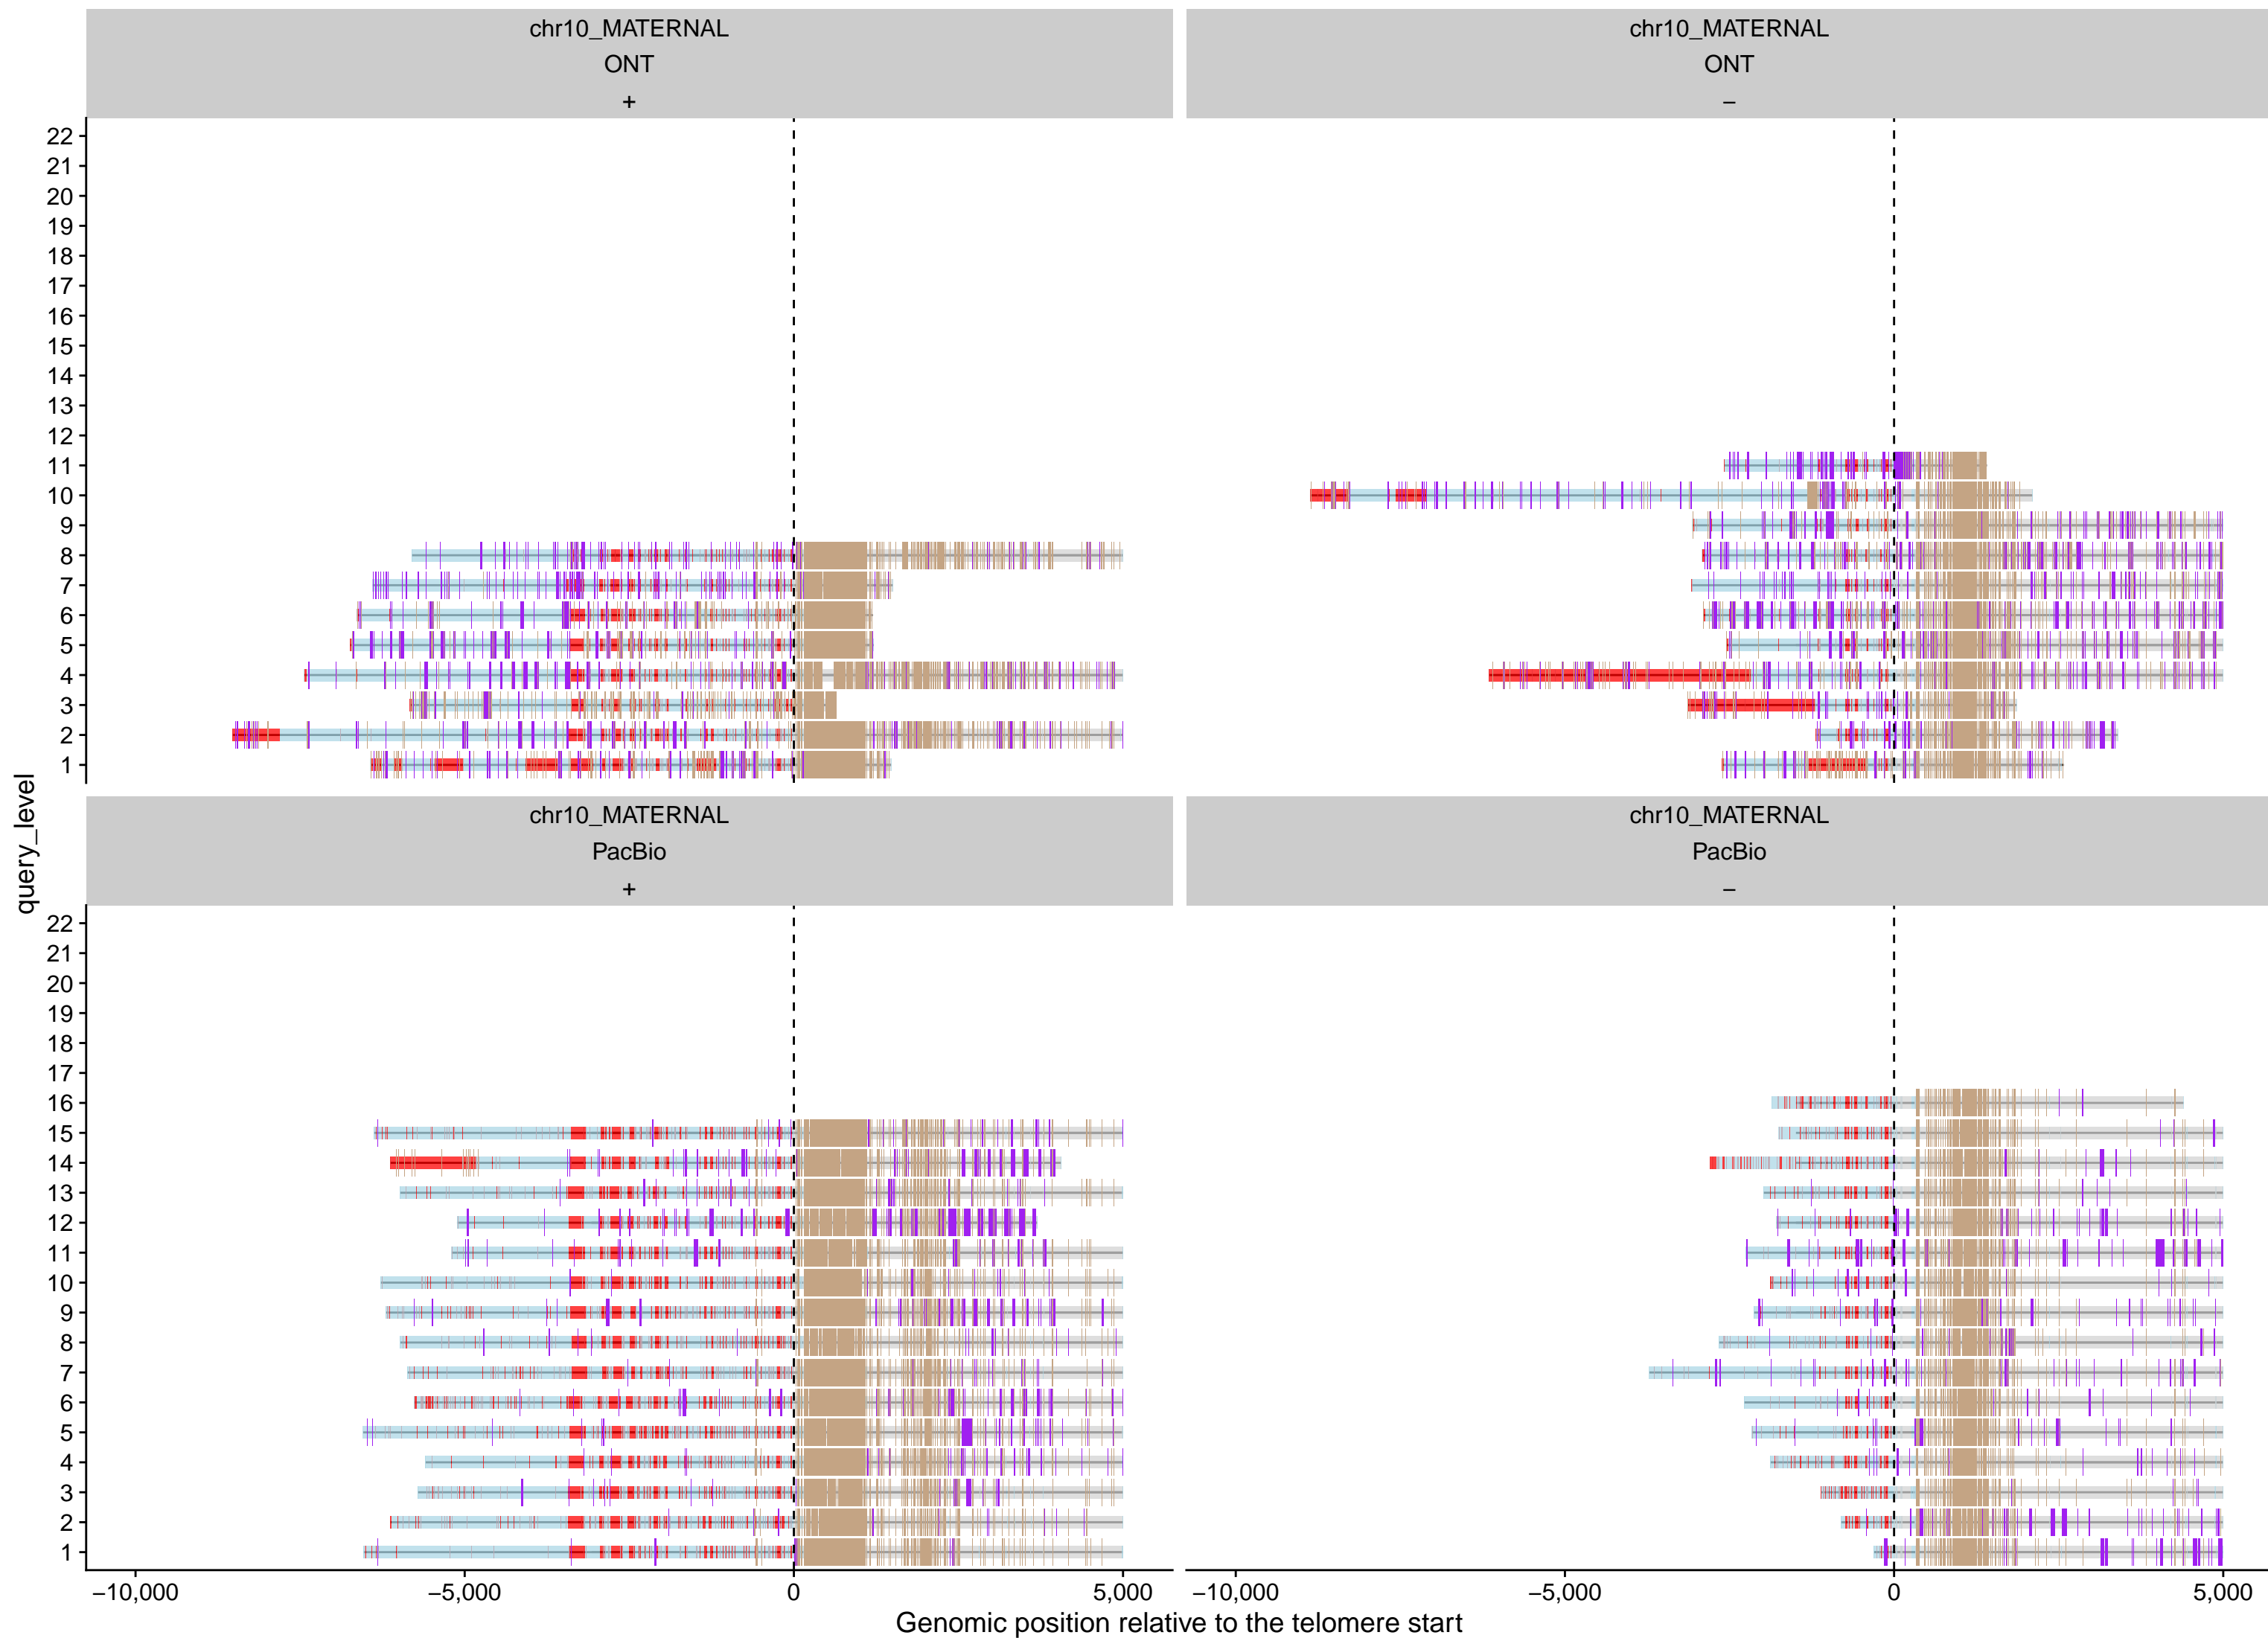

type 5mC DNA m6a NotTelo Telo

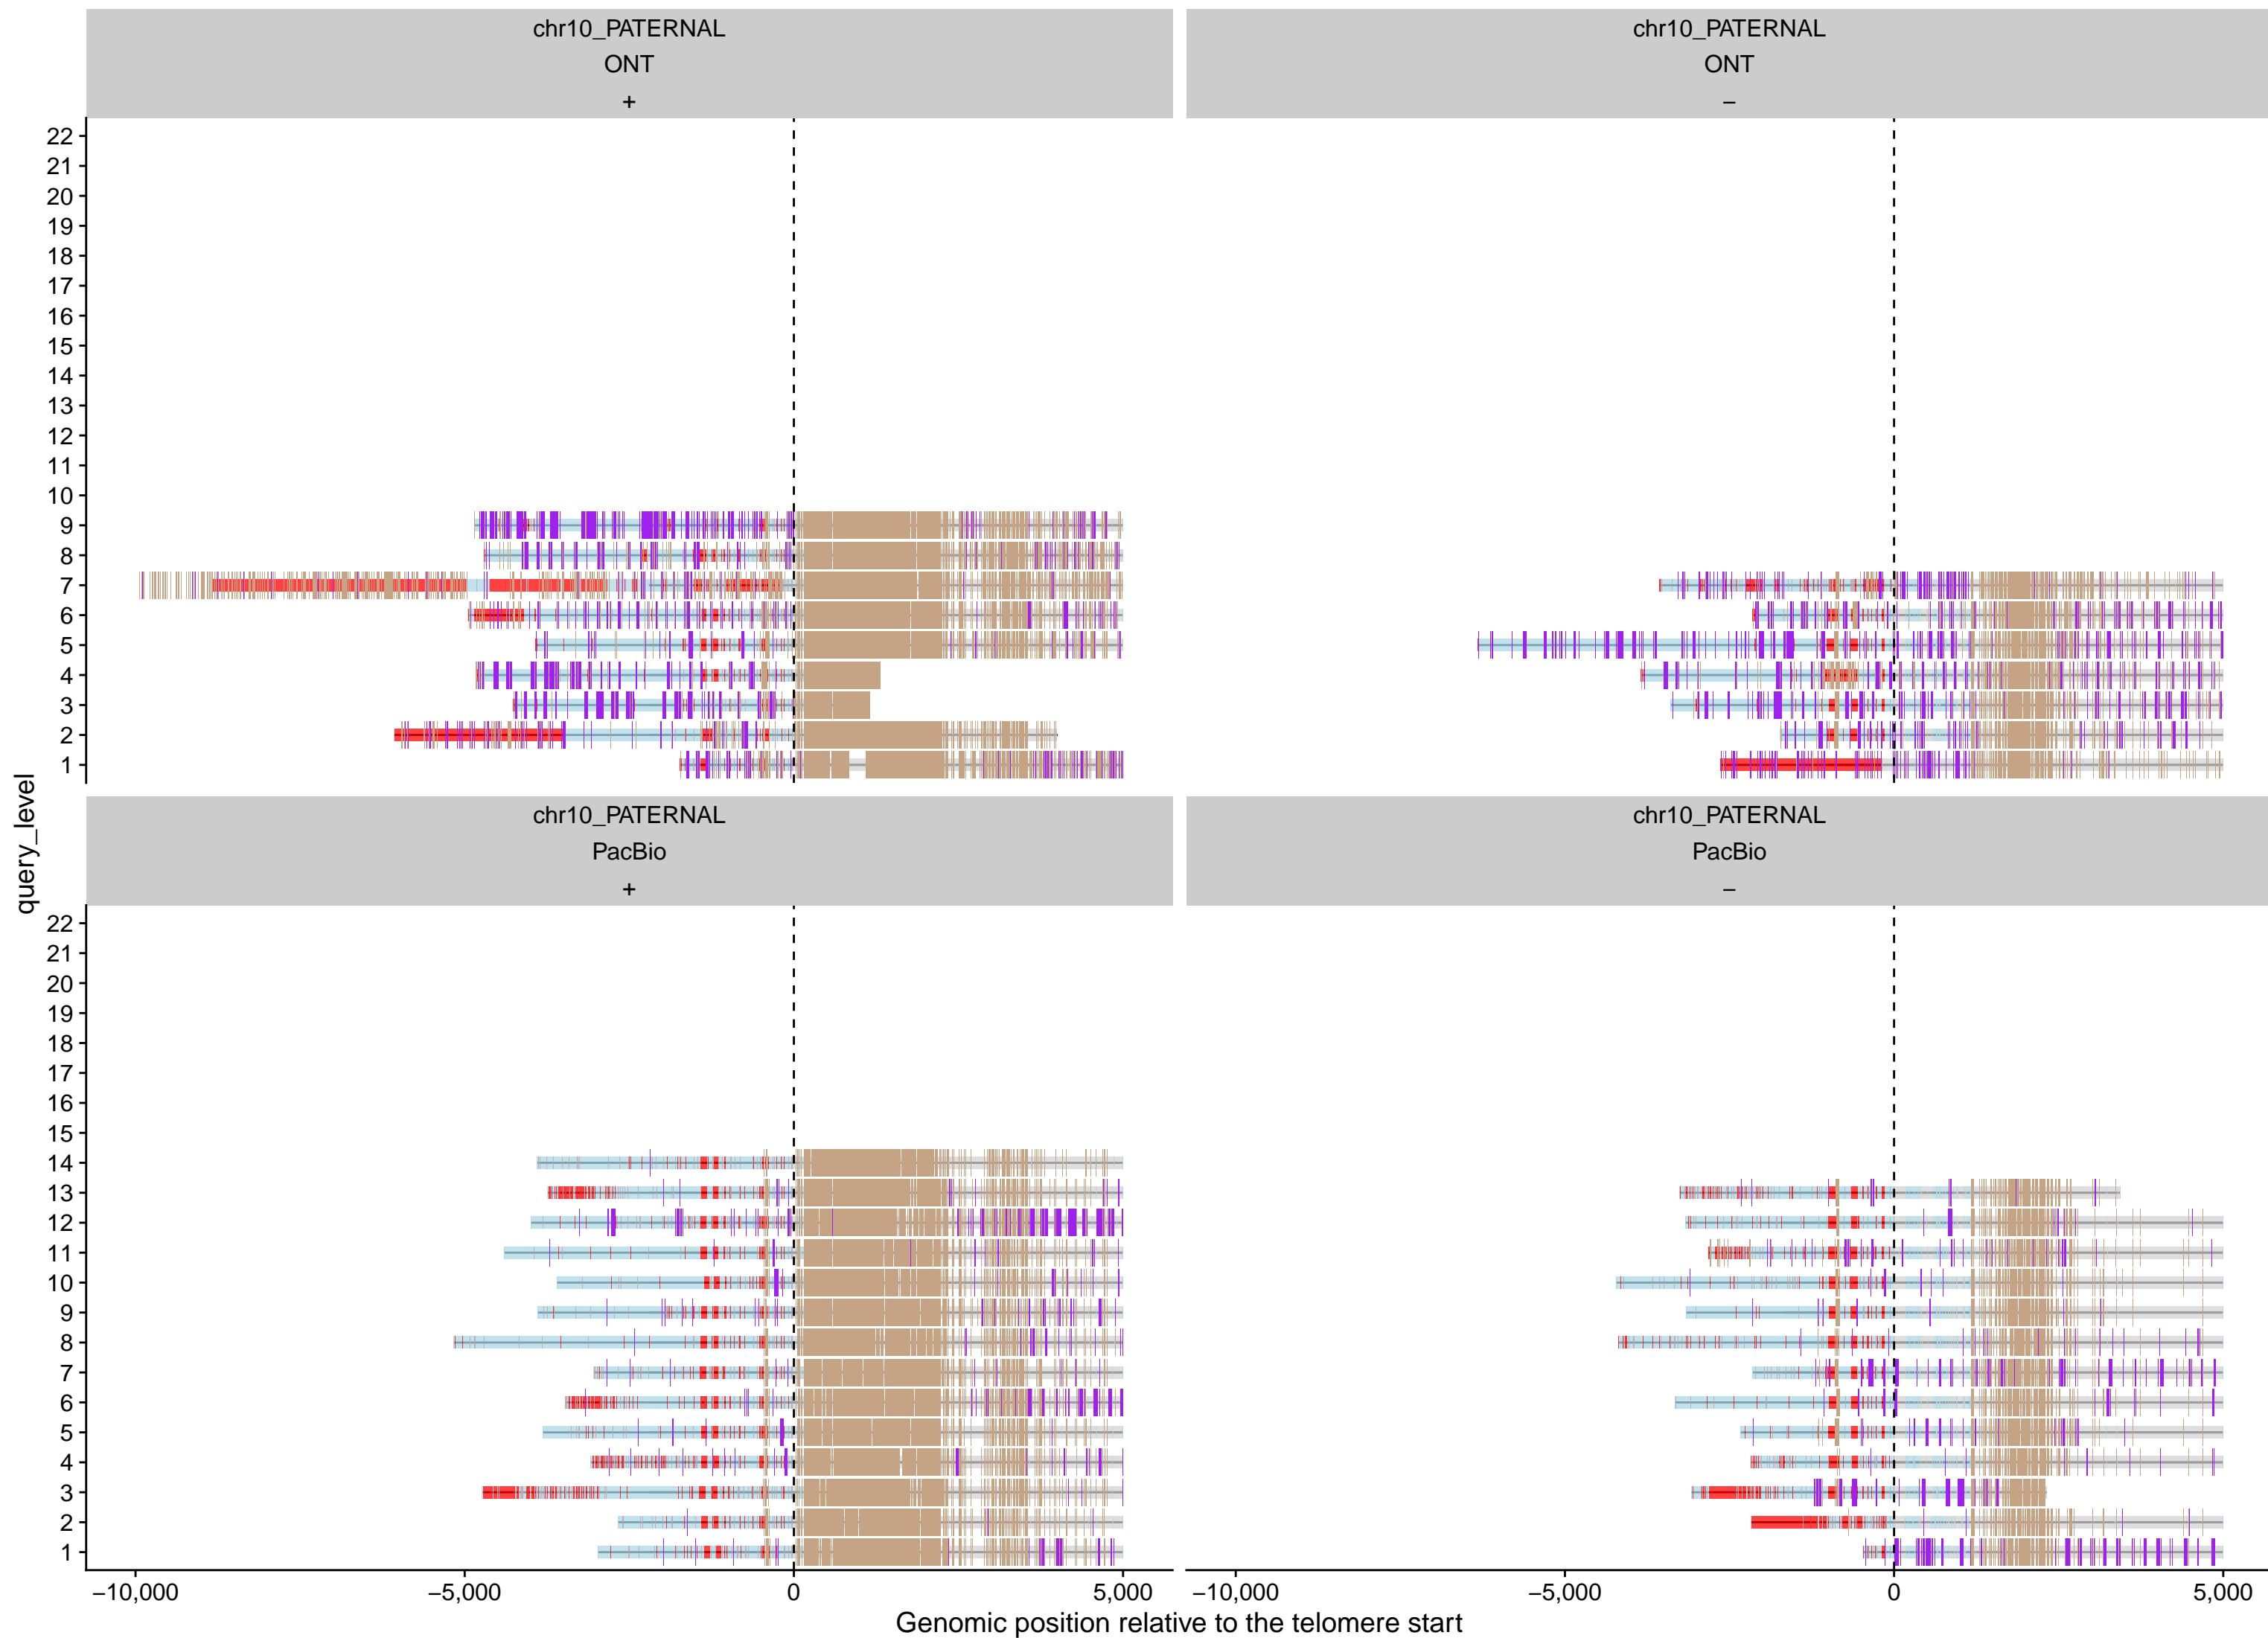

type 5mC DNA m6a NotTelo Telo

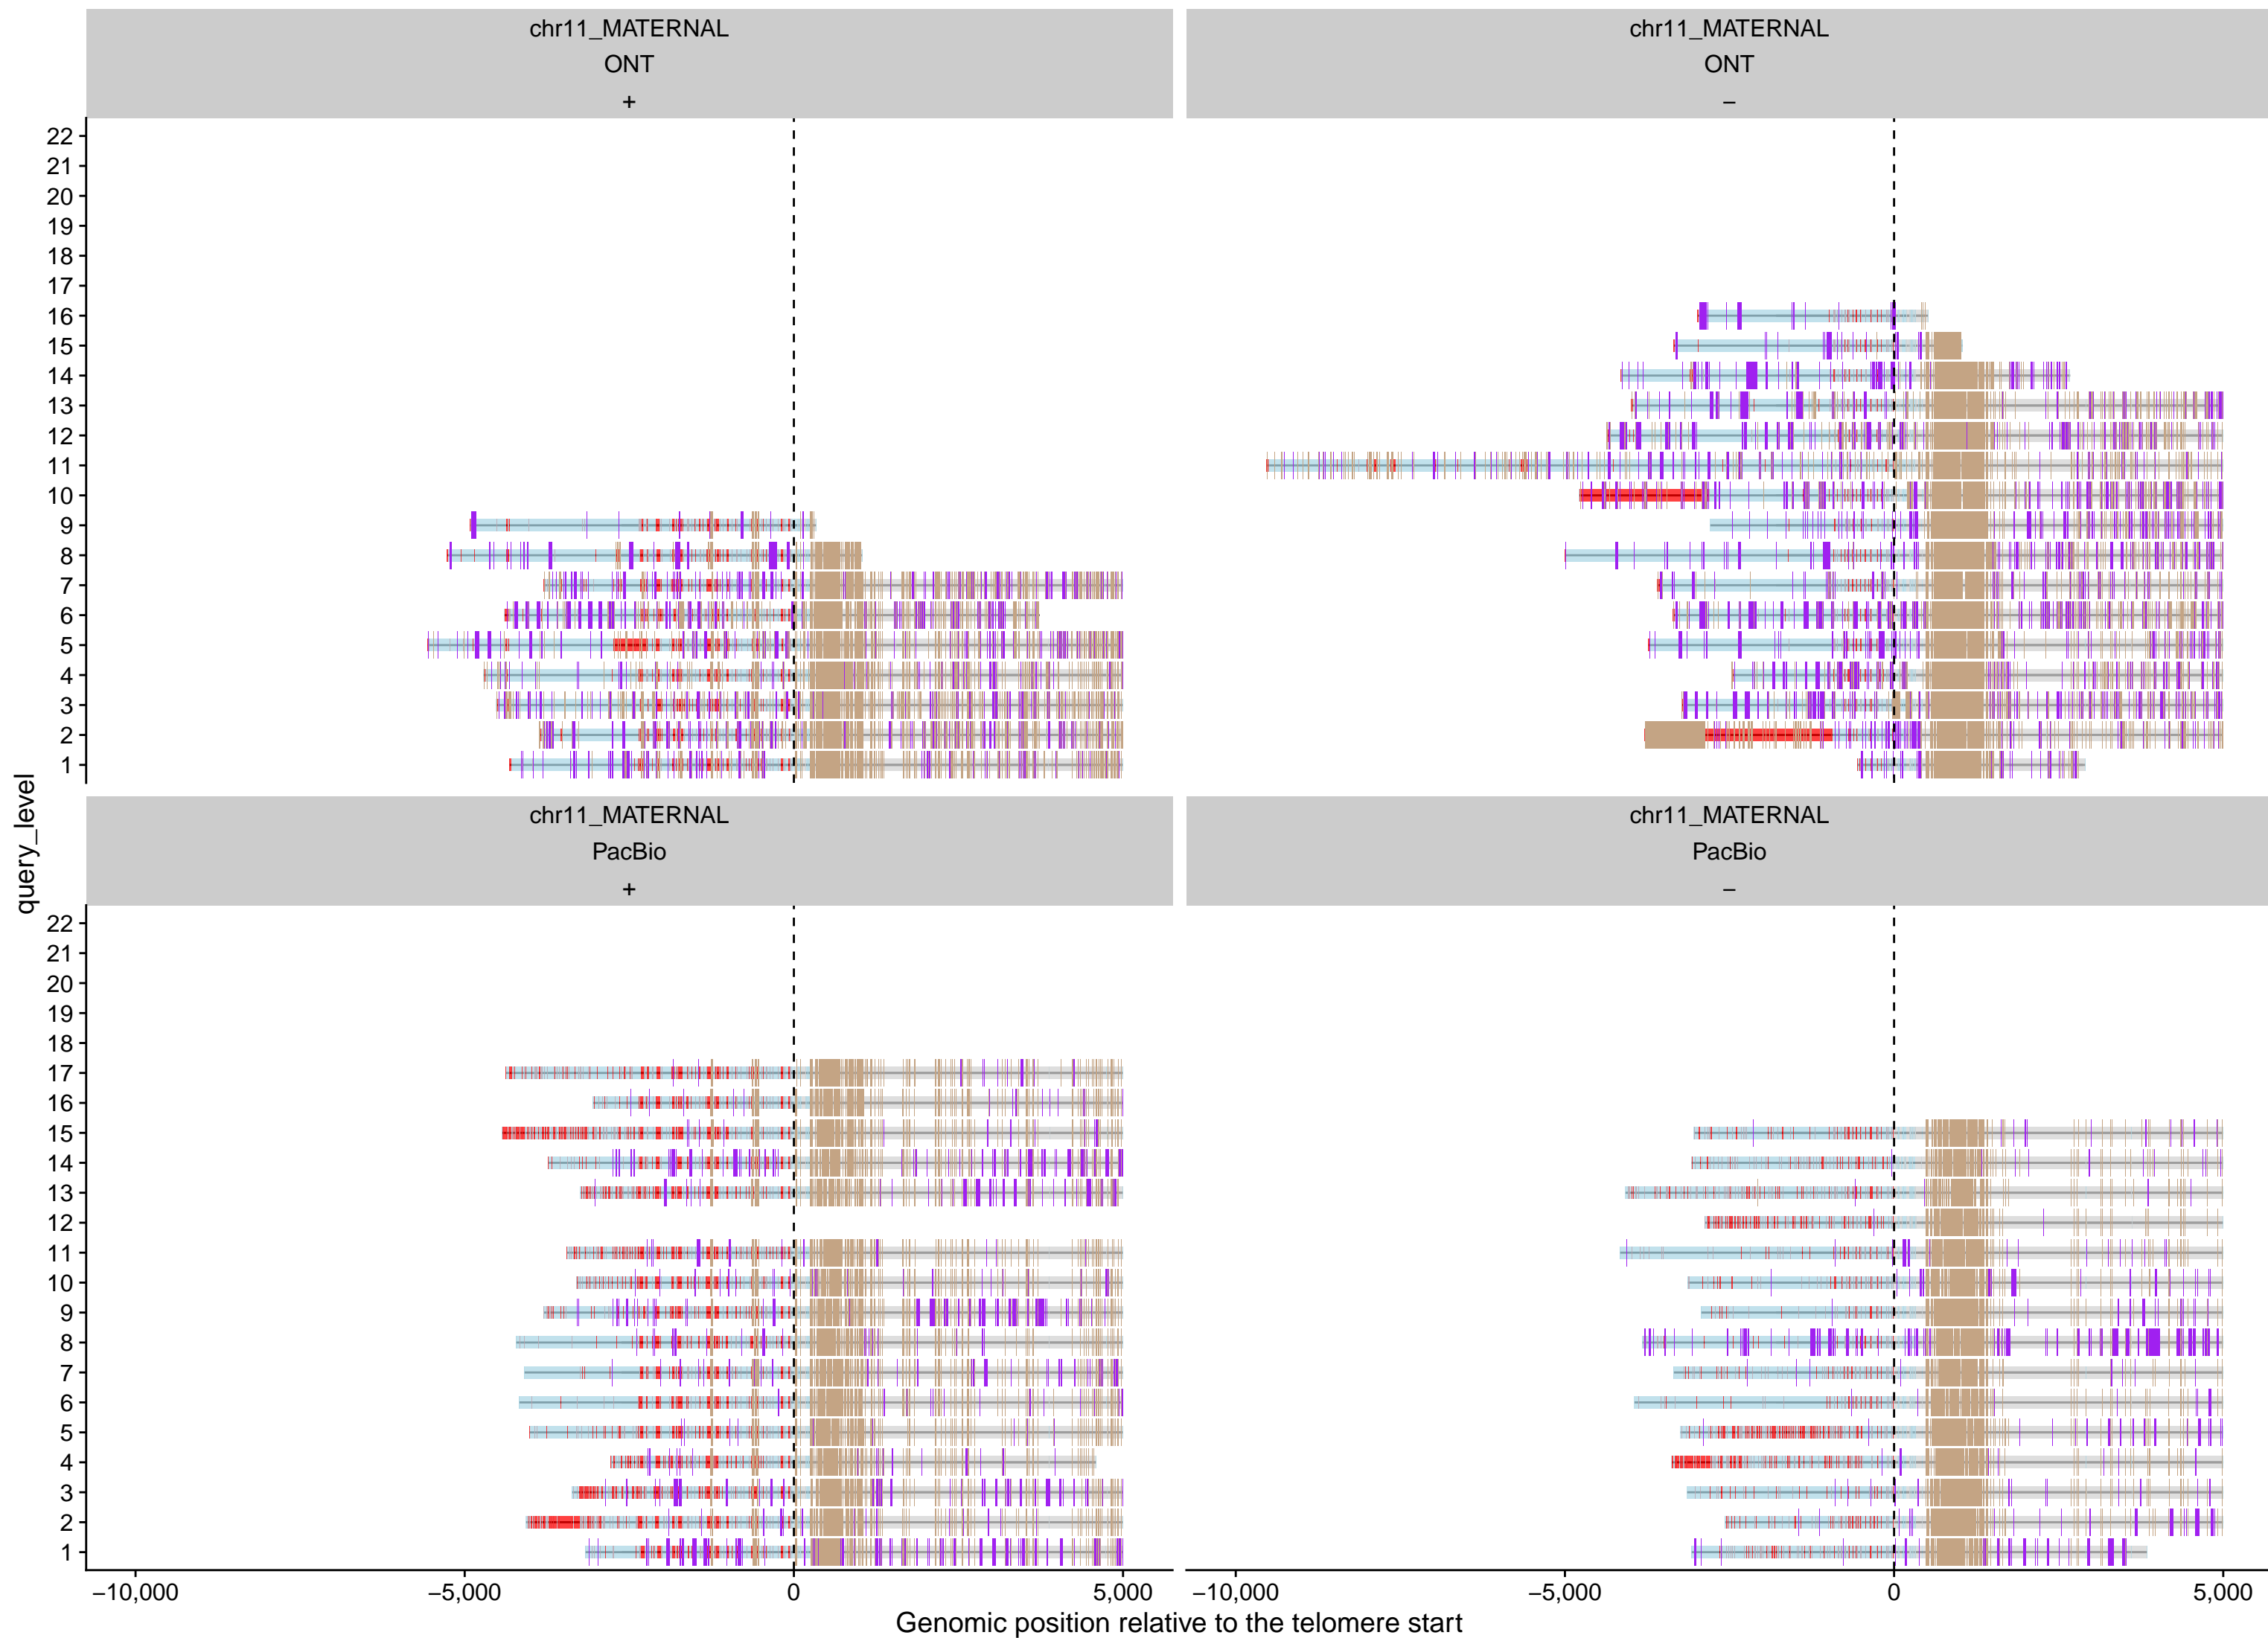

type 5mC DNA m6a NotTelo Telo

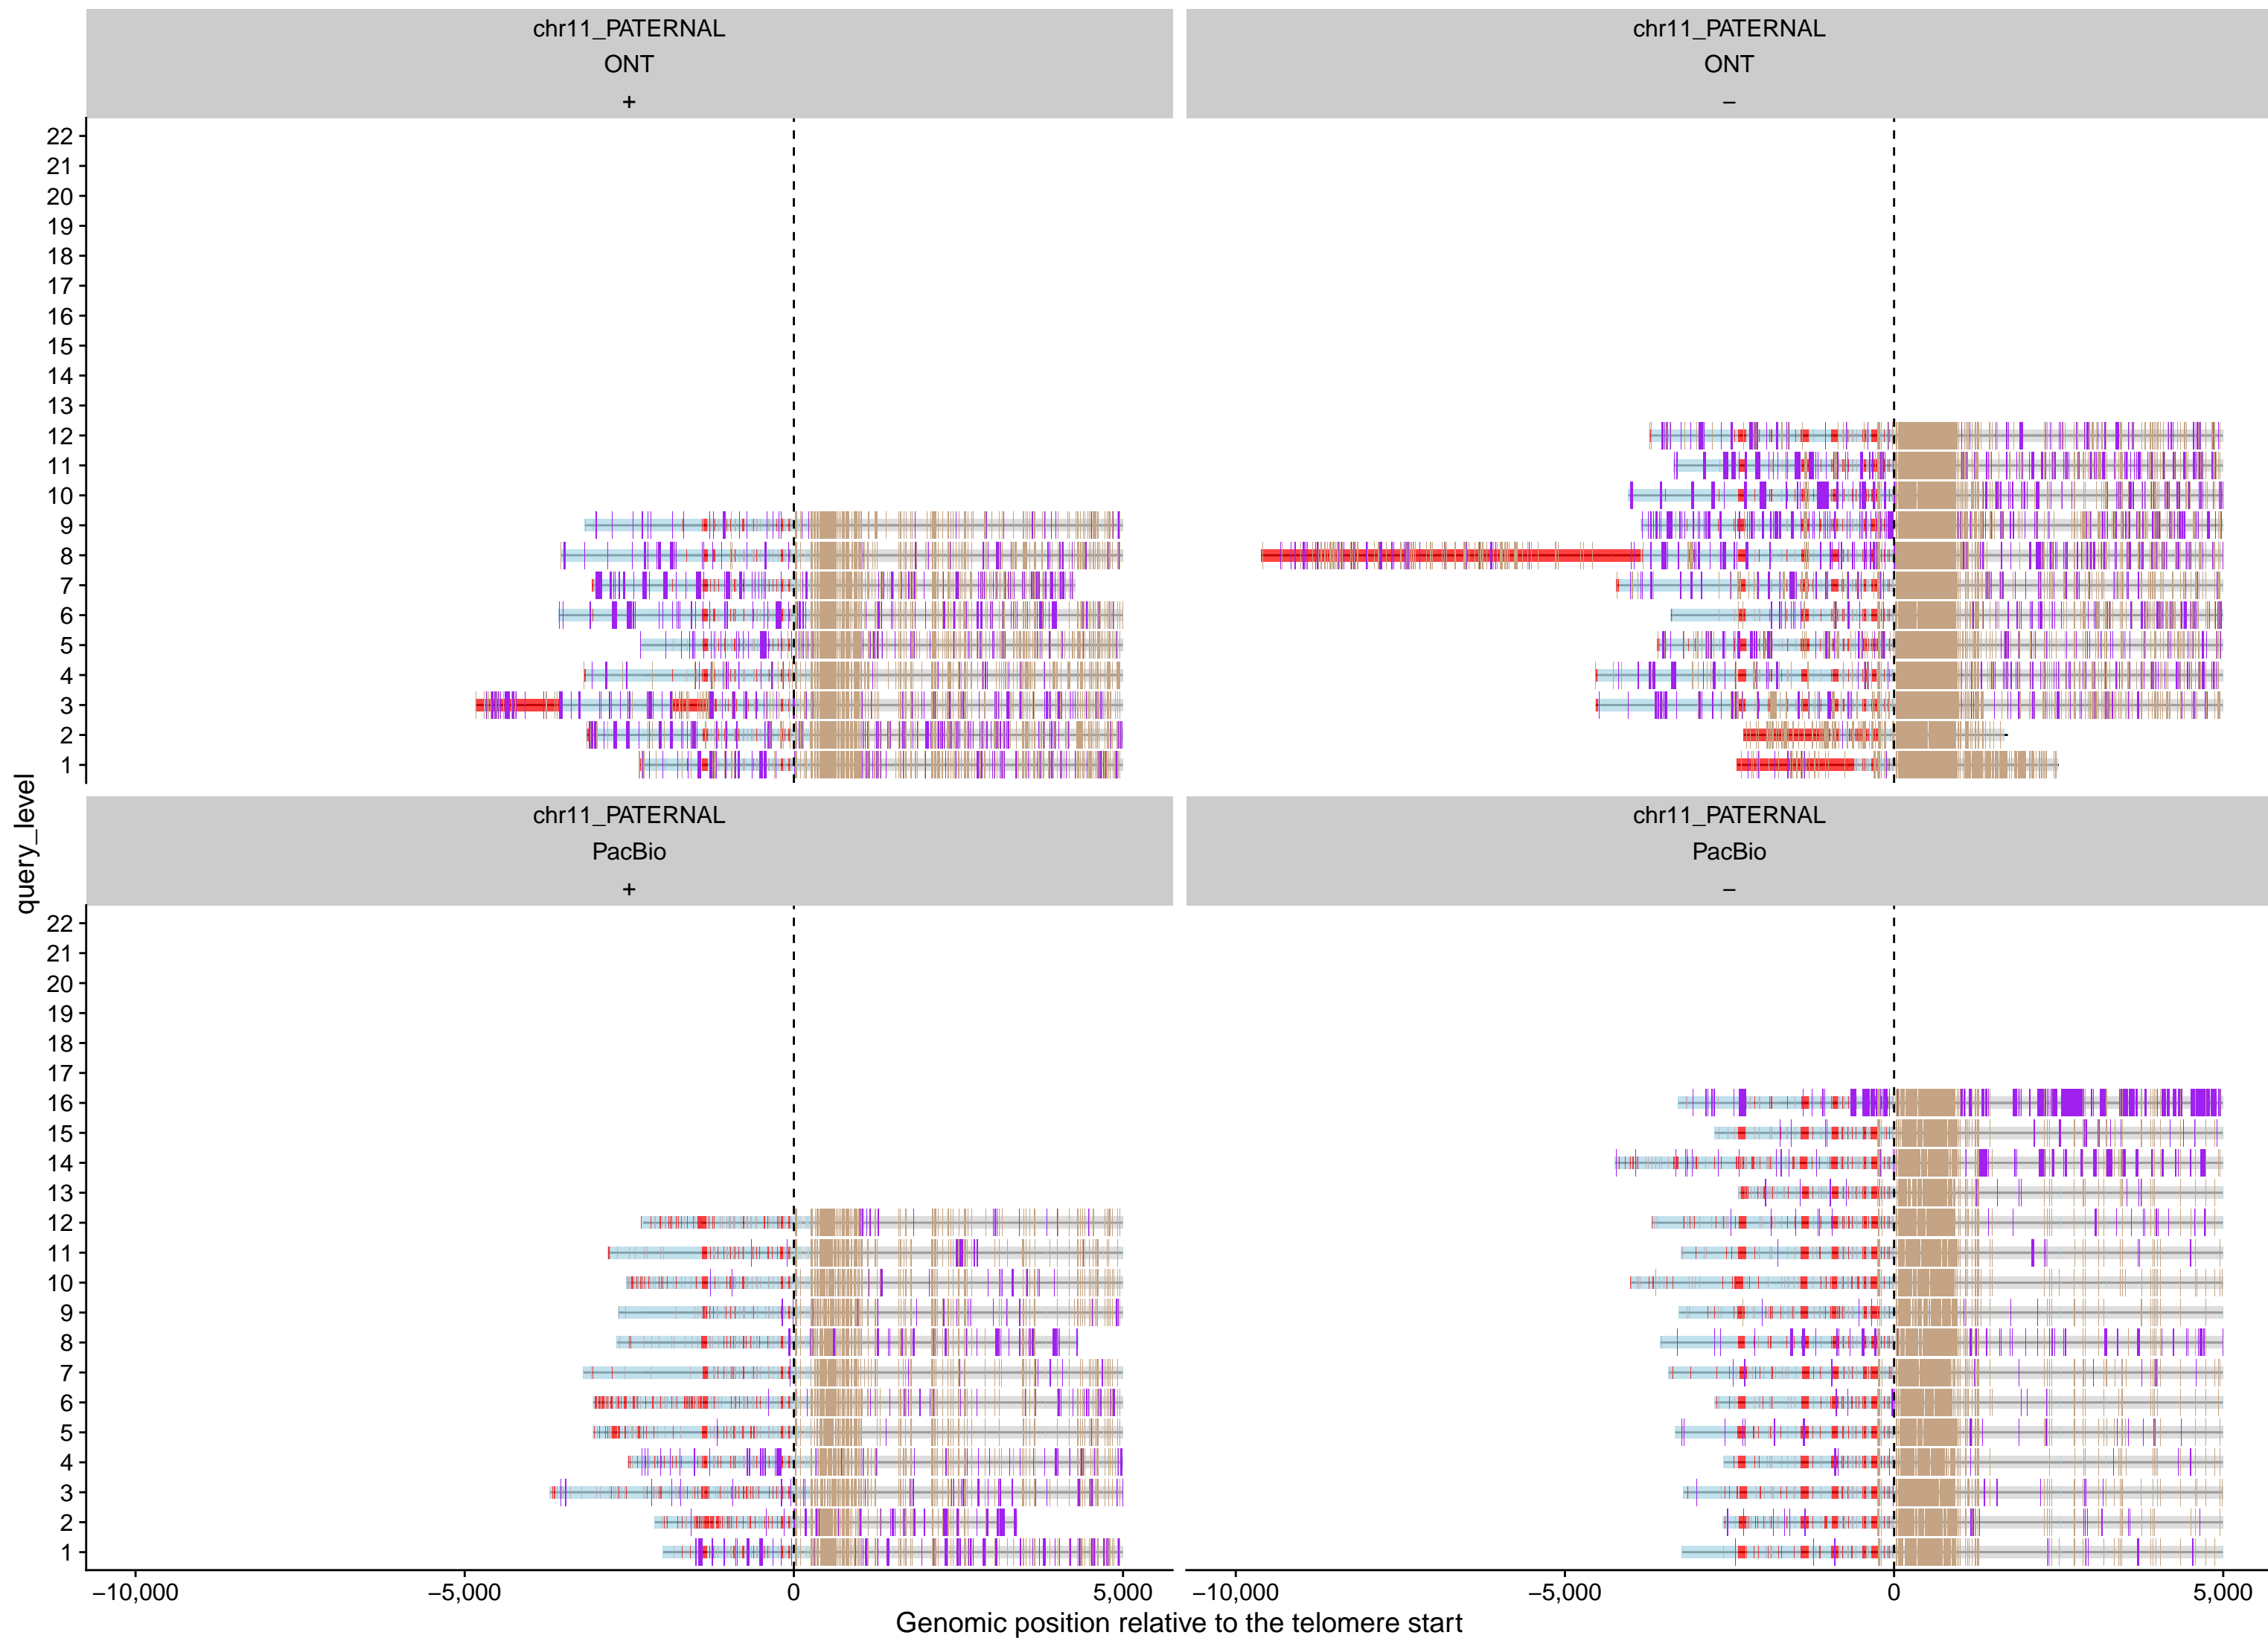

type 5mC DNA m6a NotTelo Telo

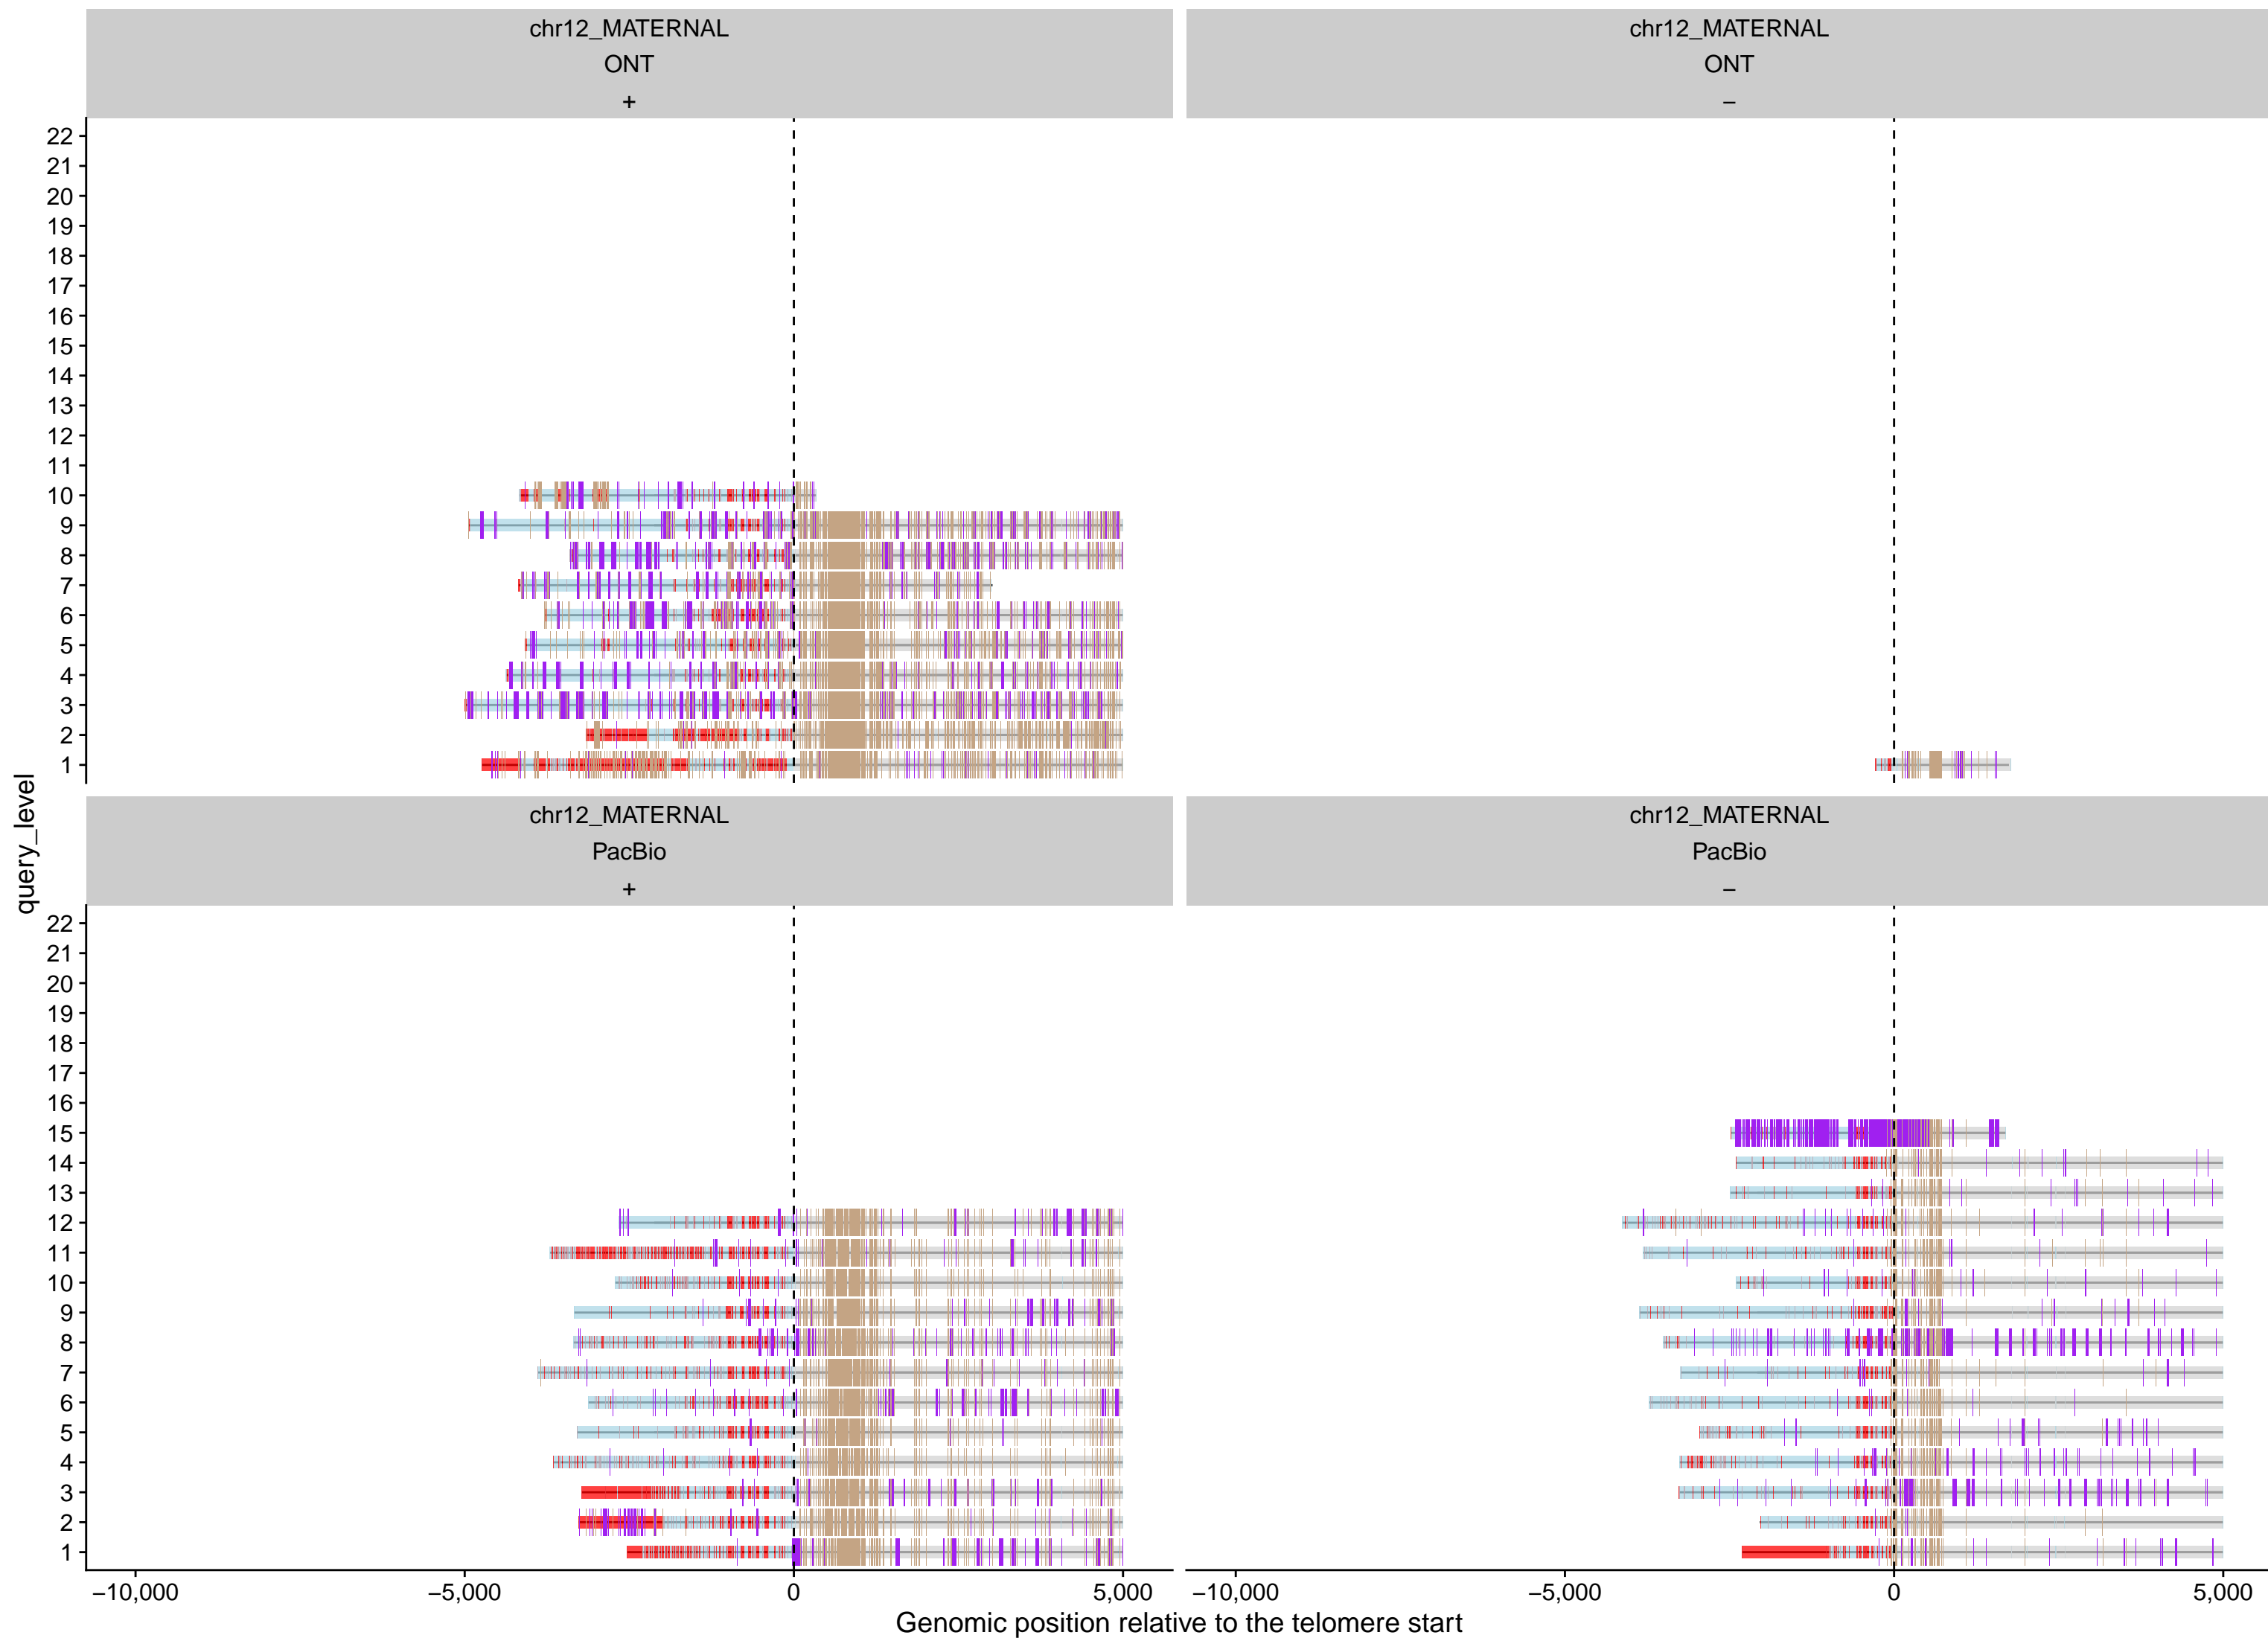

type 5mC DNA m6a NotTelo Telo

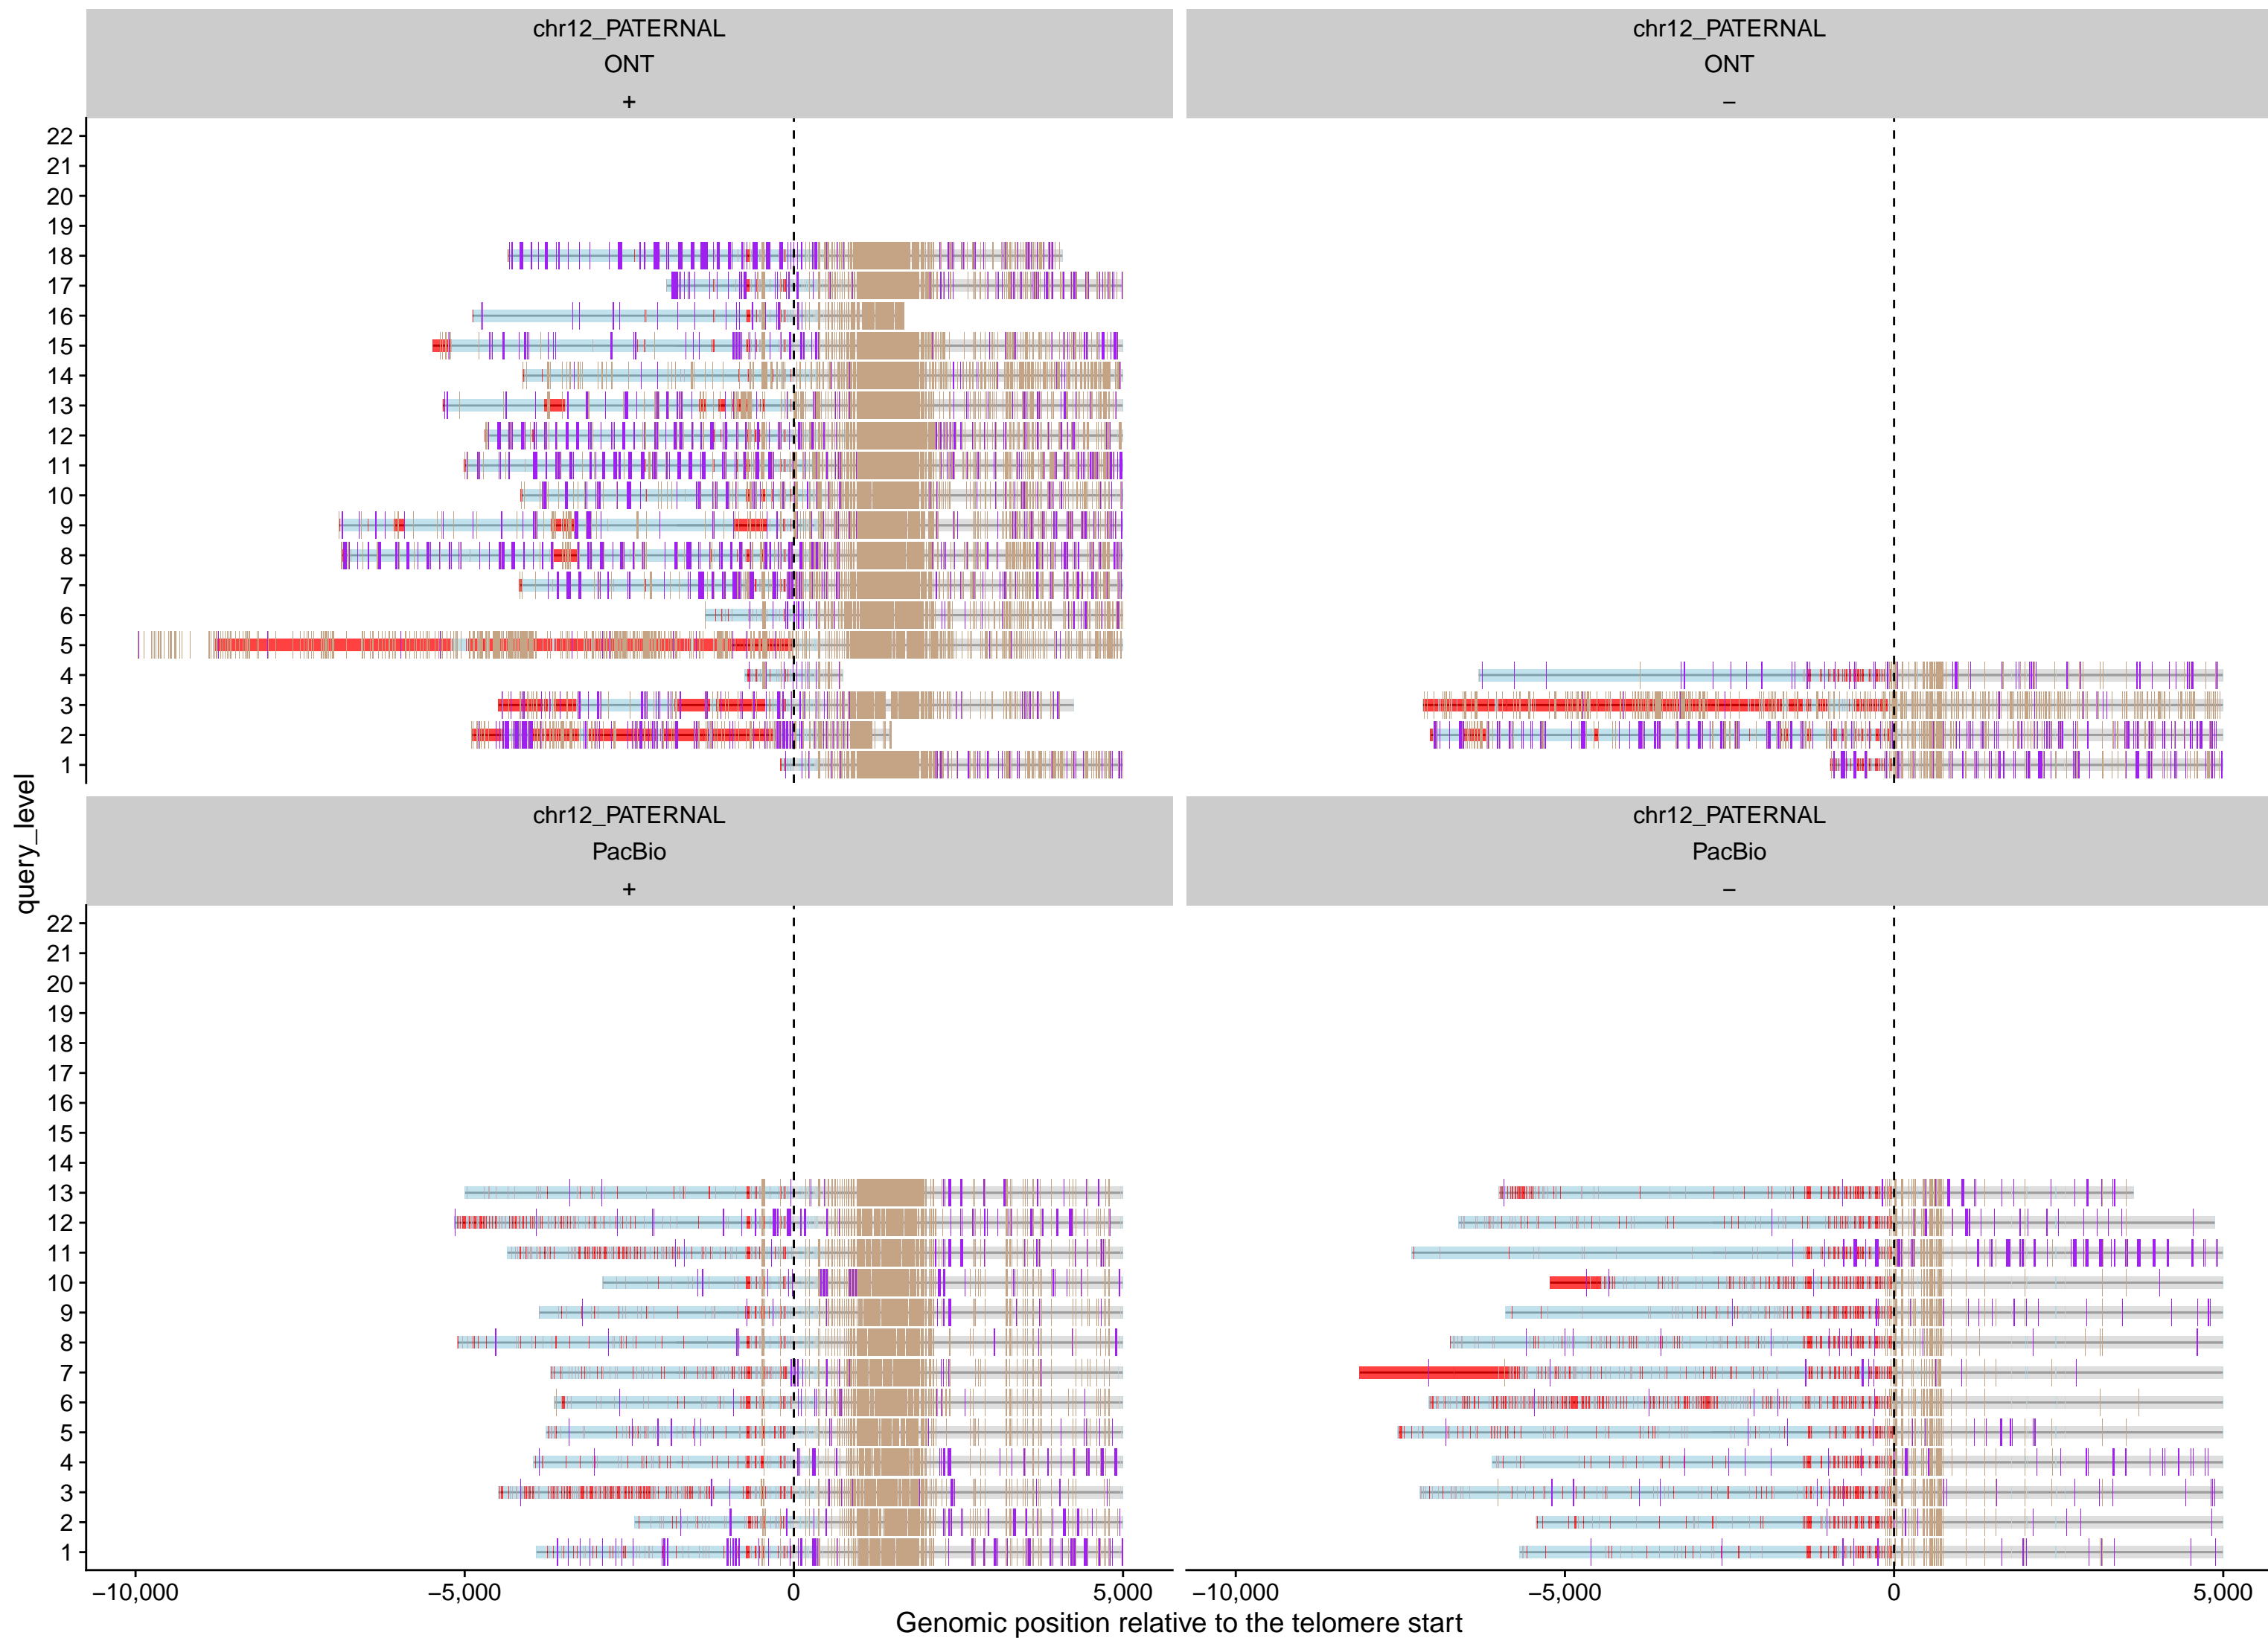

type 5mC DNA m6a NotTelo Telo

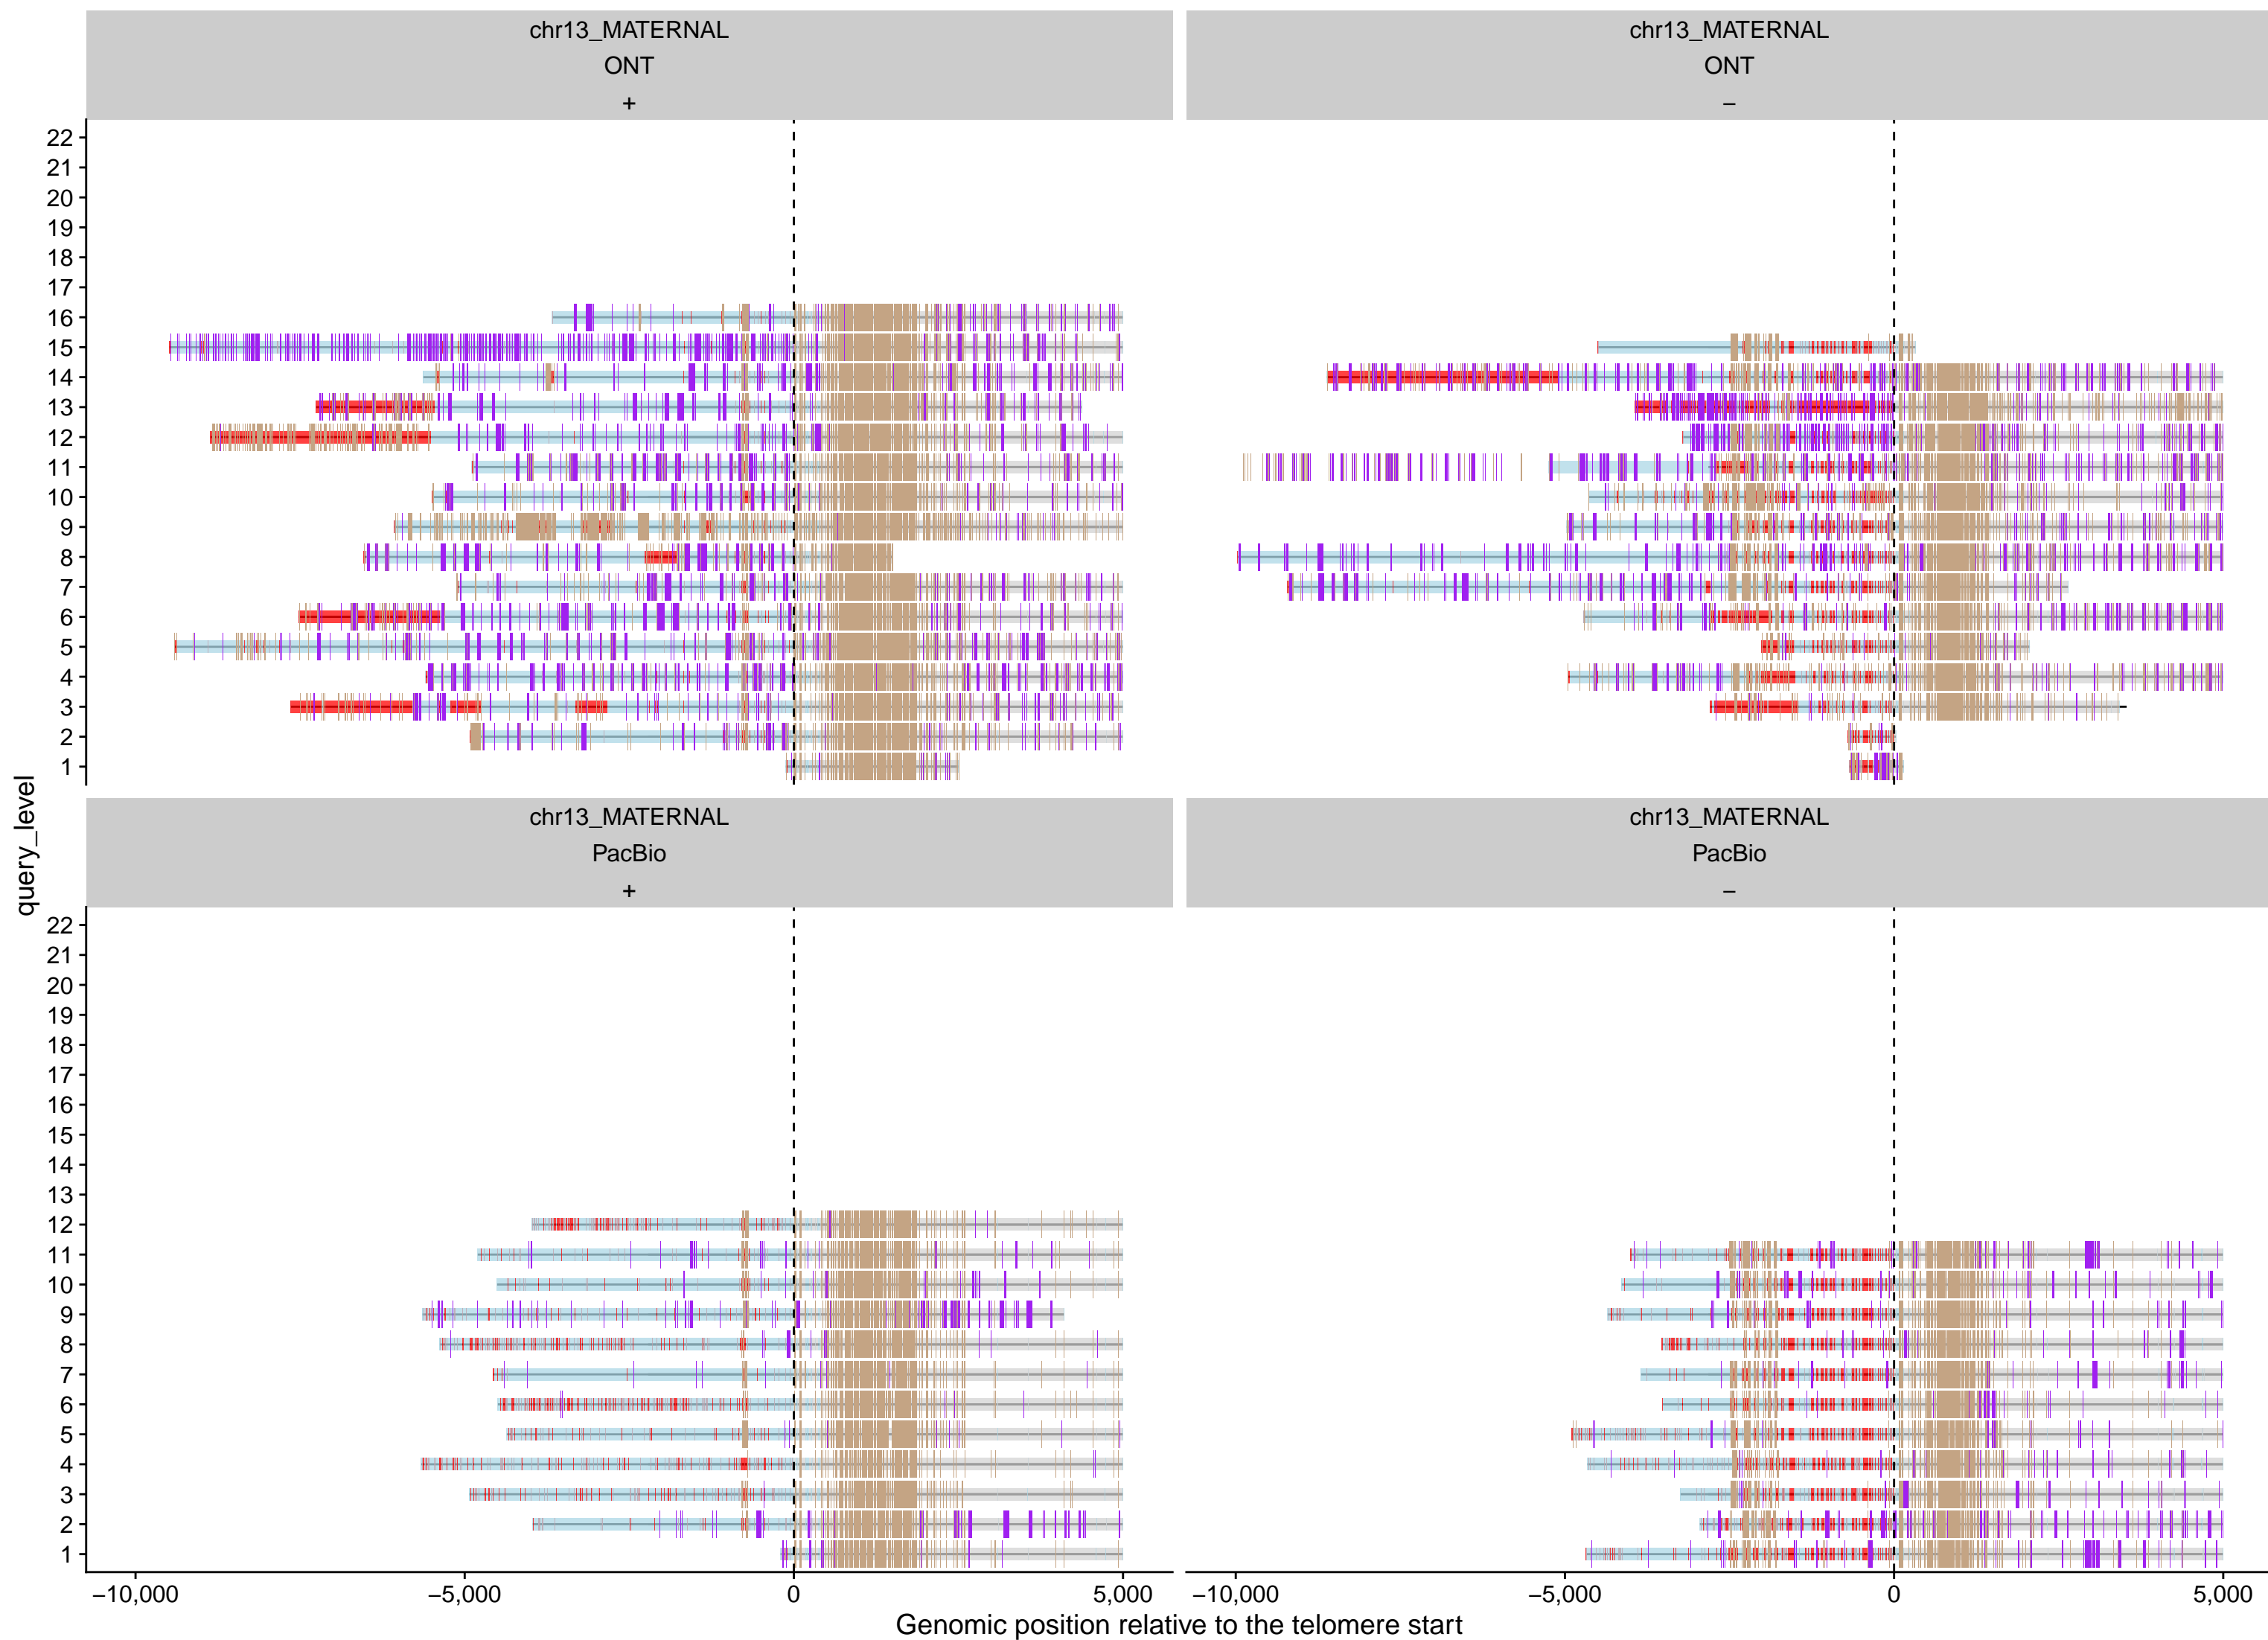

type 5mC DNA m6a NotTelo Telo

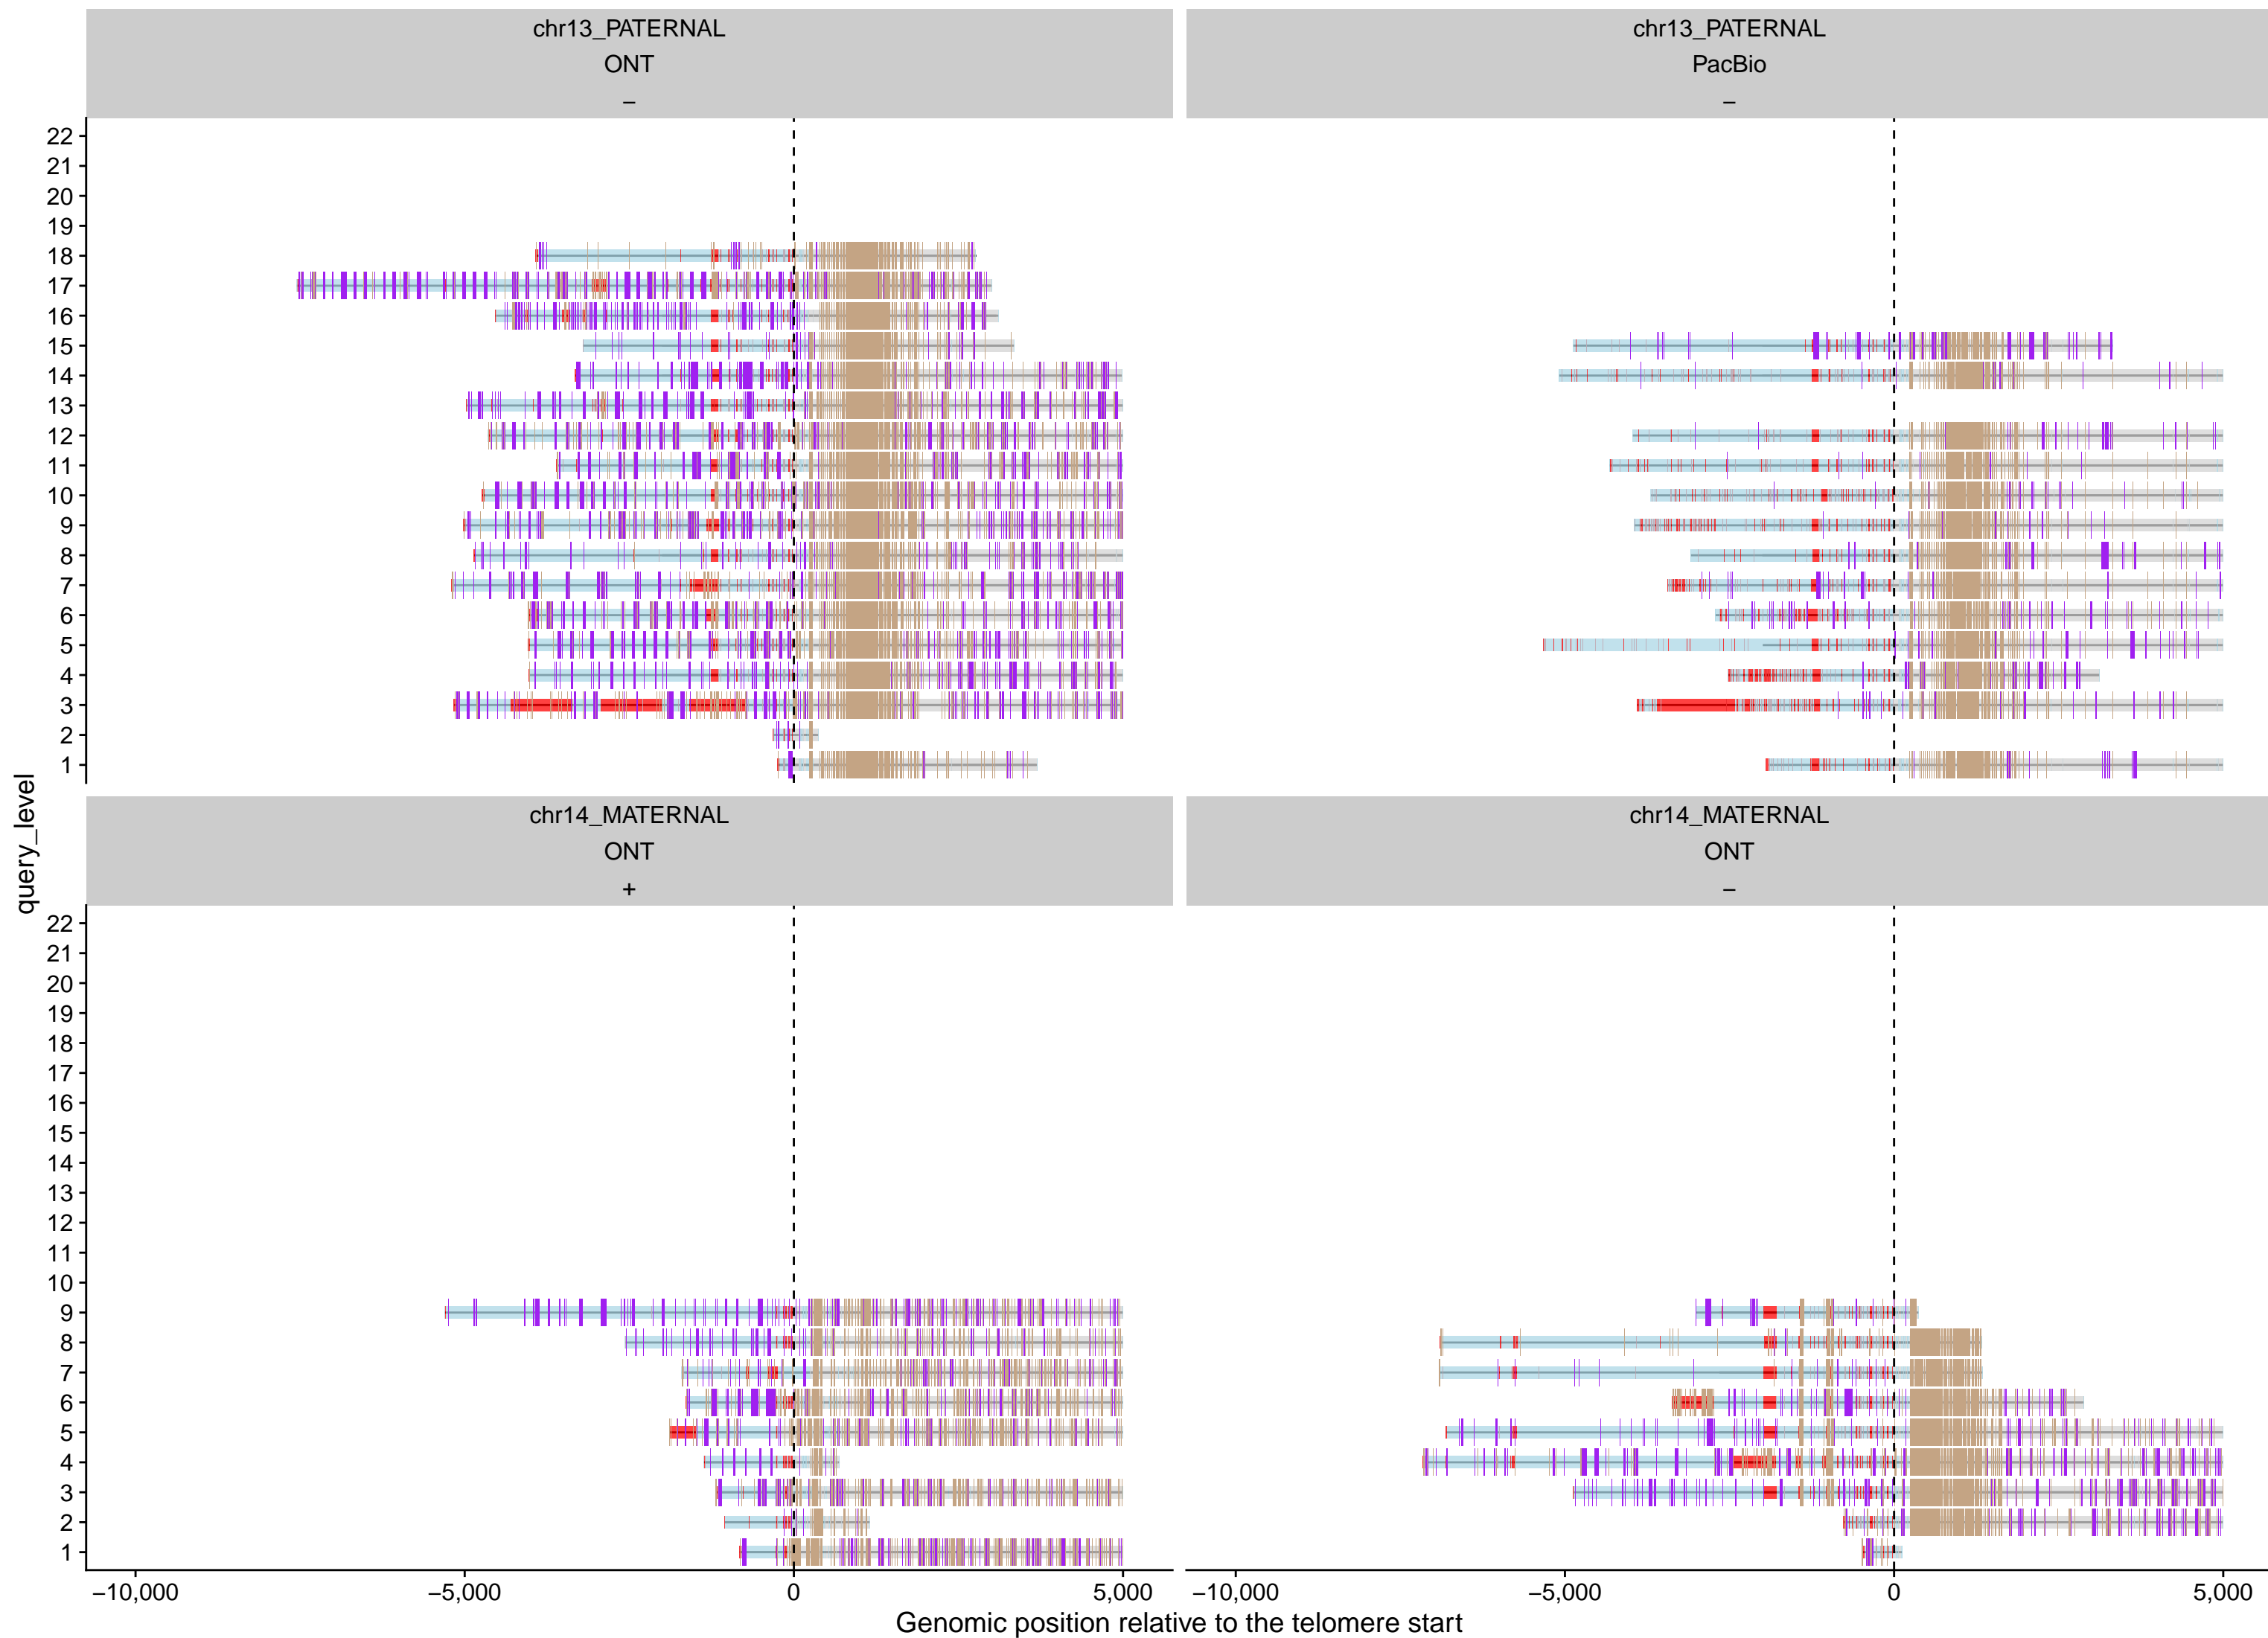

type 5mC DNA m6a NotTelo Telo

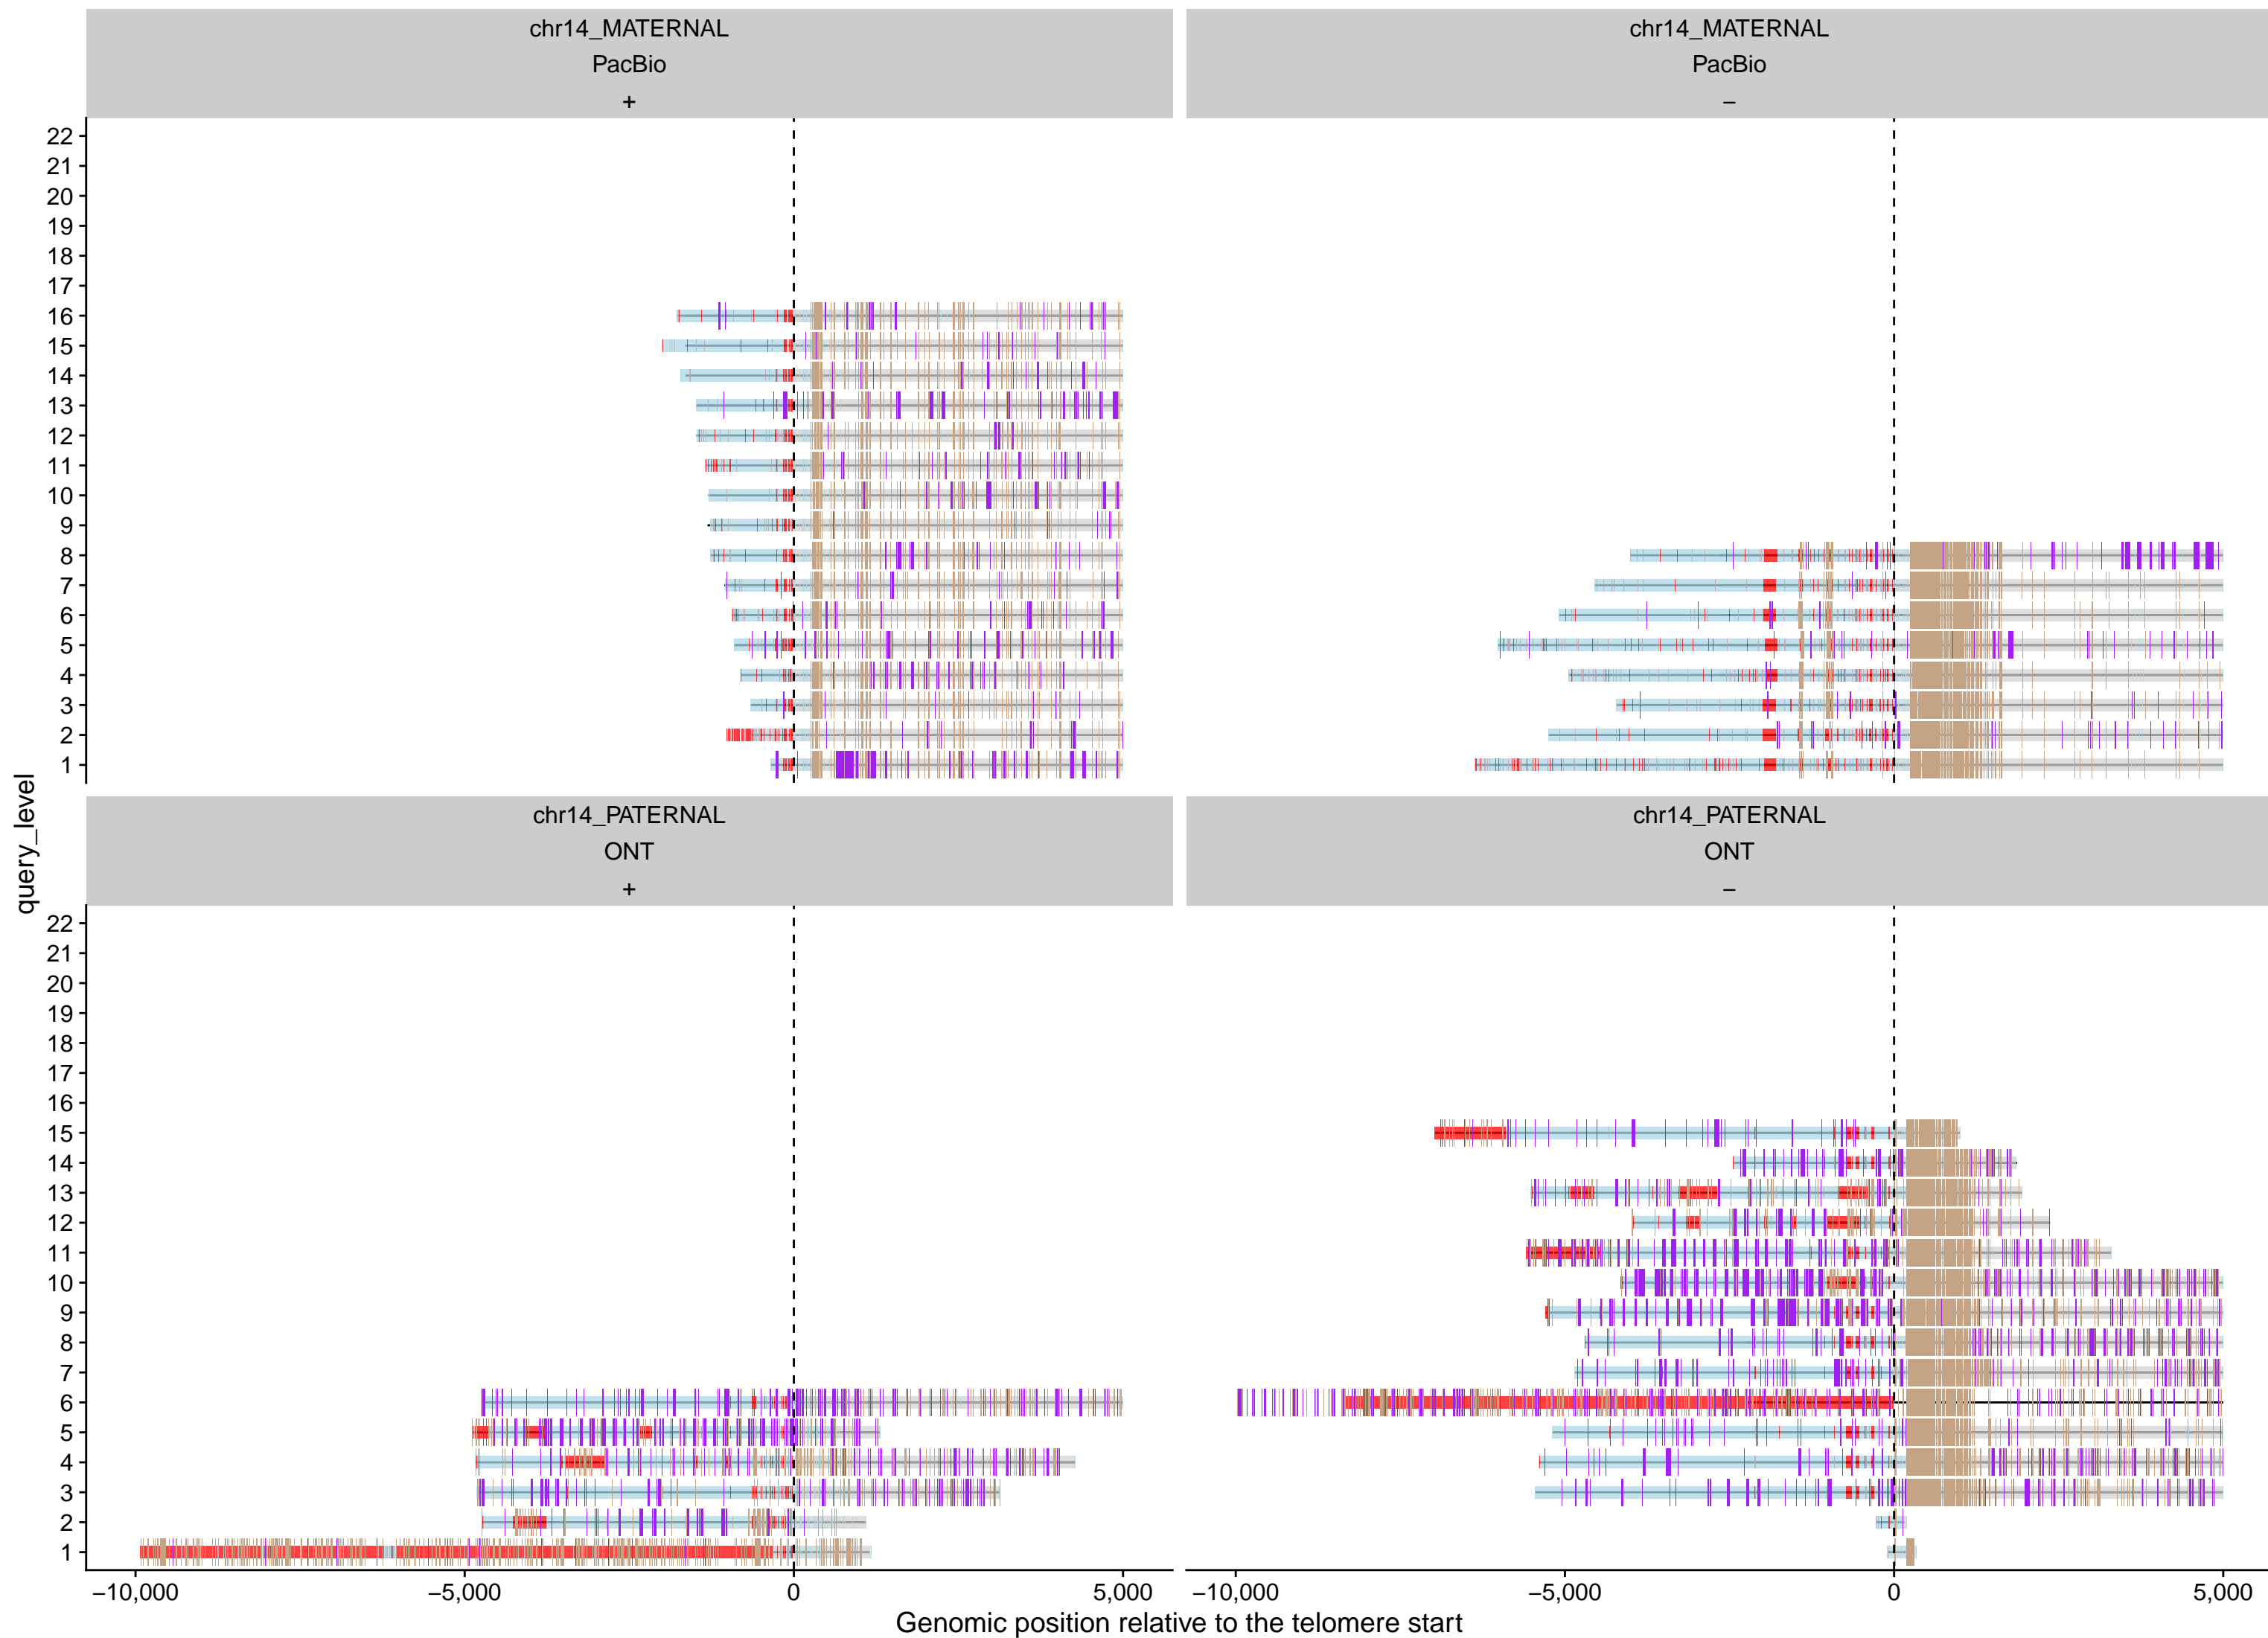

type 5mC DNA m6a NotTelo Telo

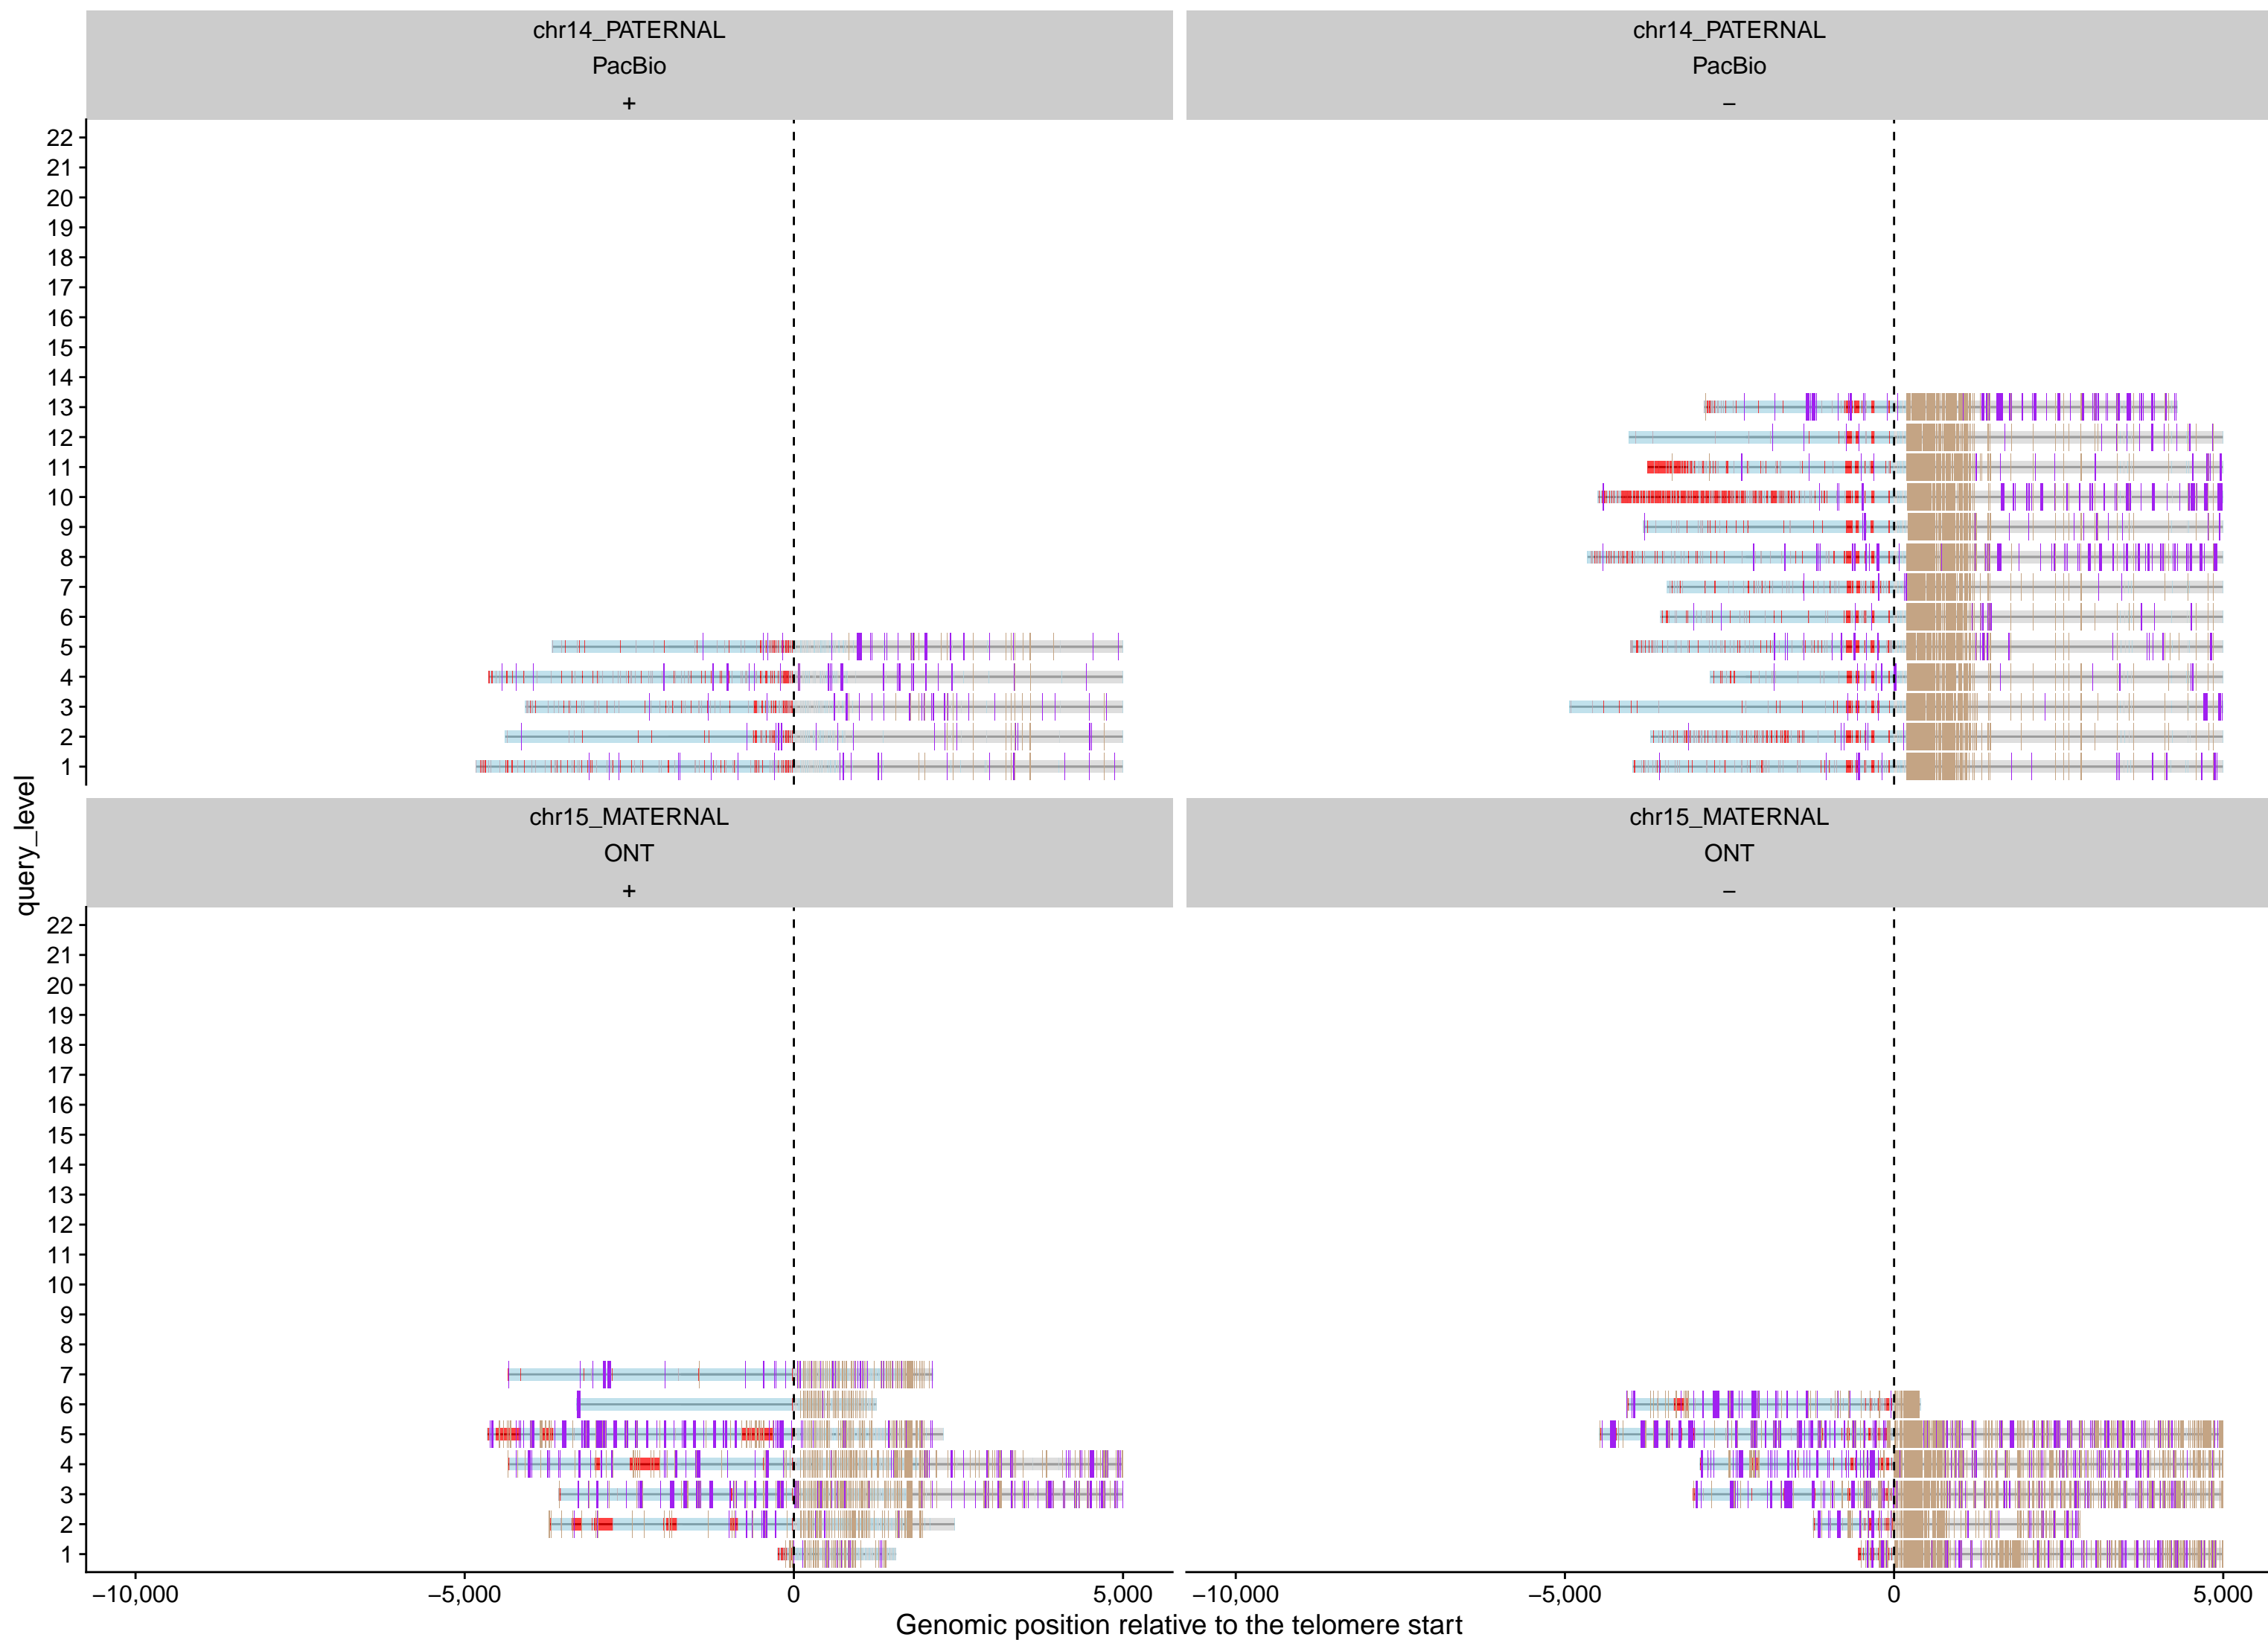

type 5mC DNA m6a NotTelo Telo

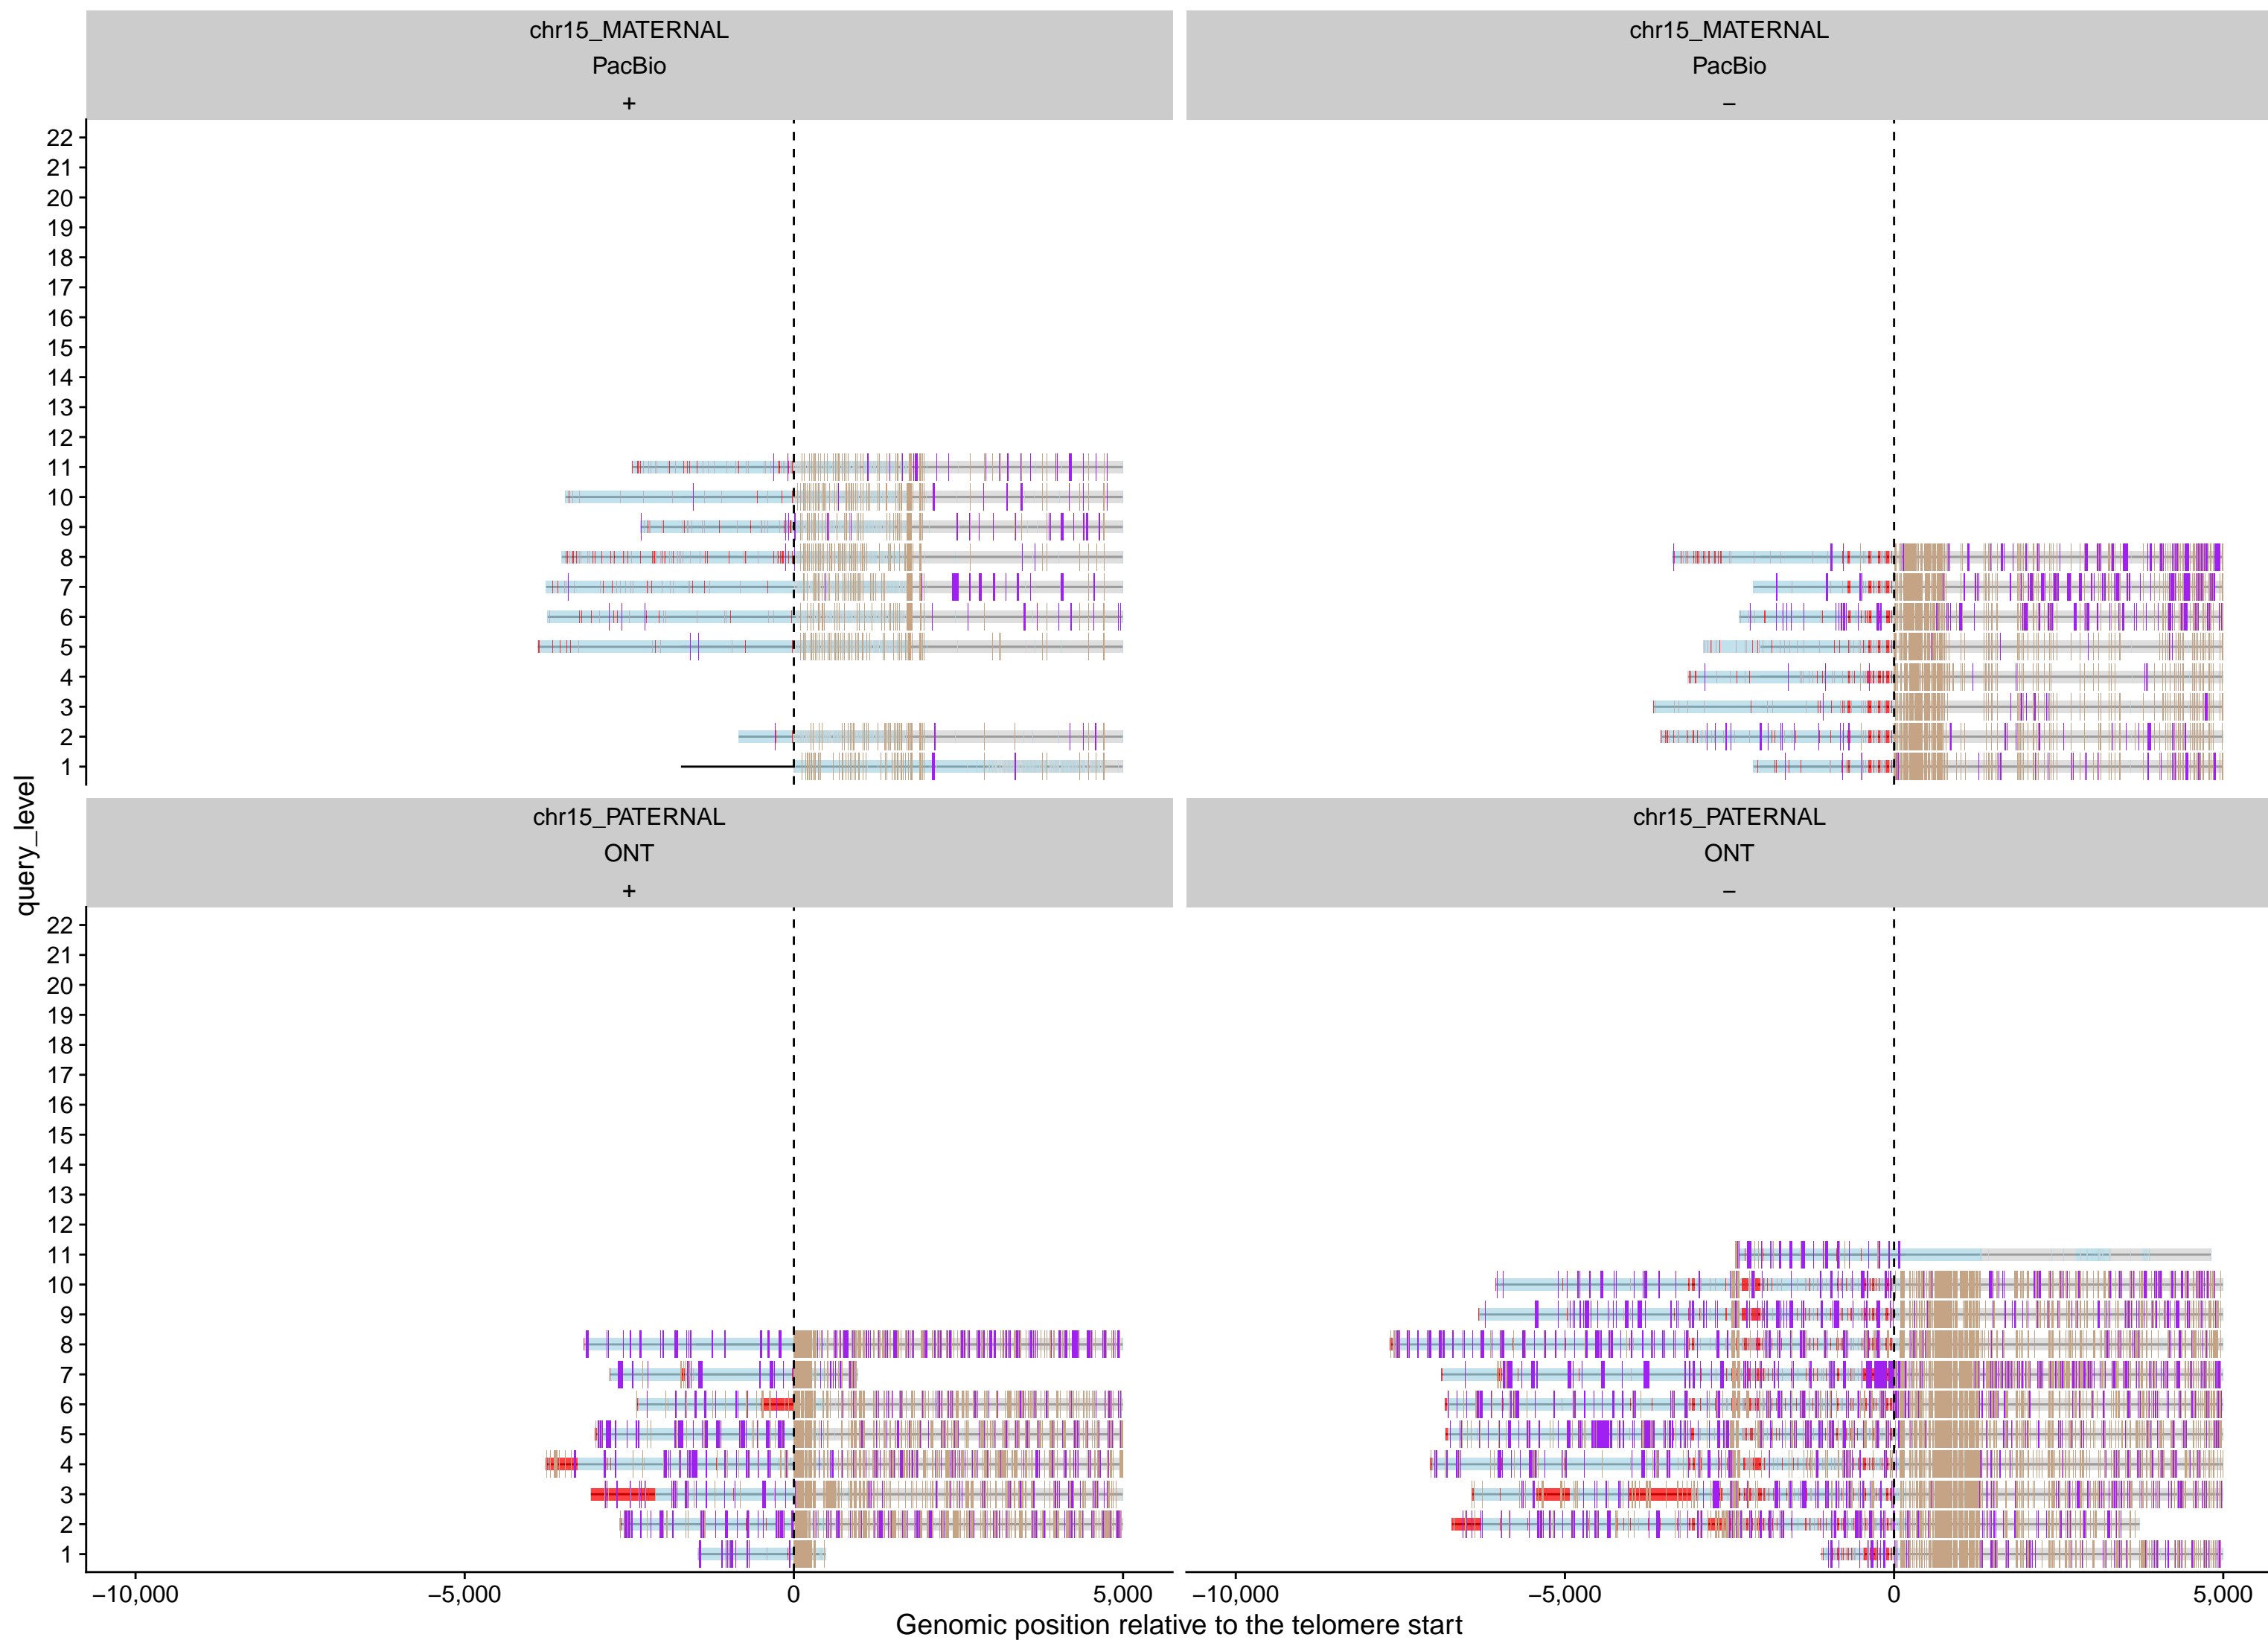

type 5mC DNA m6a NotTelo Telo

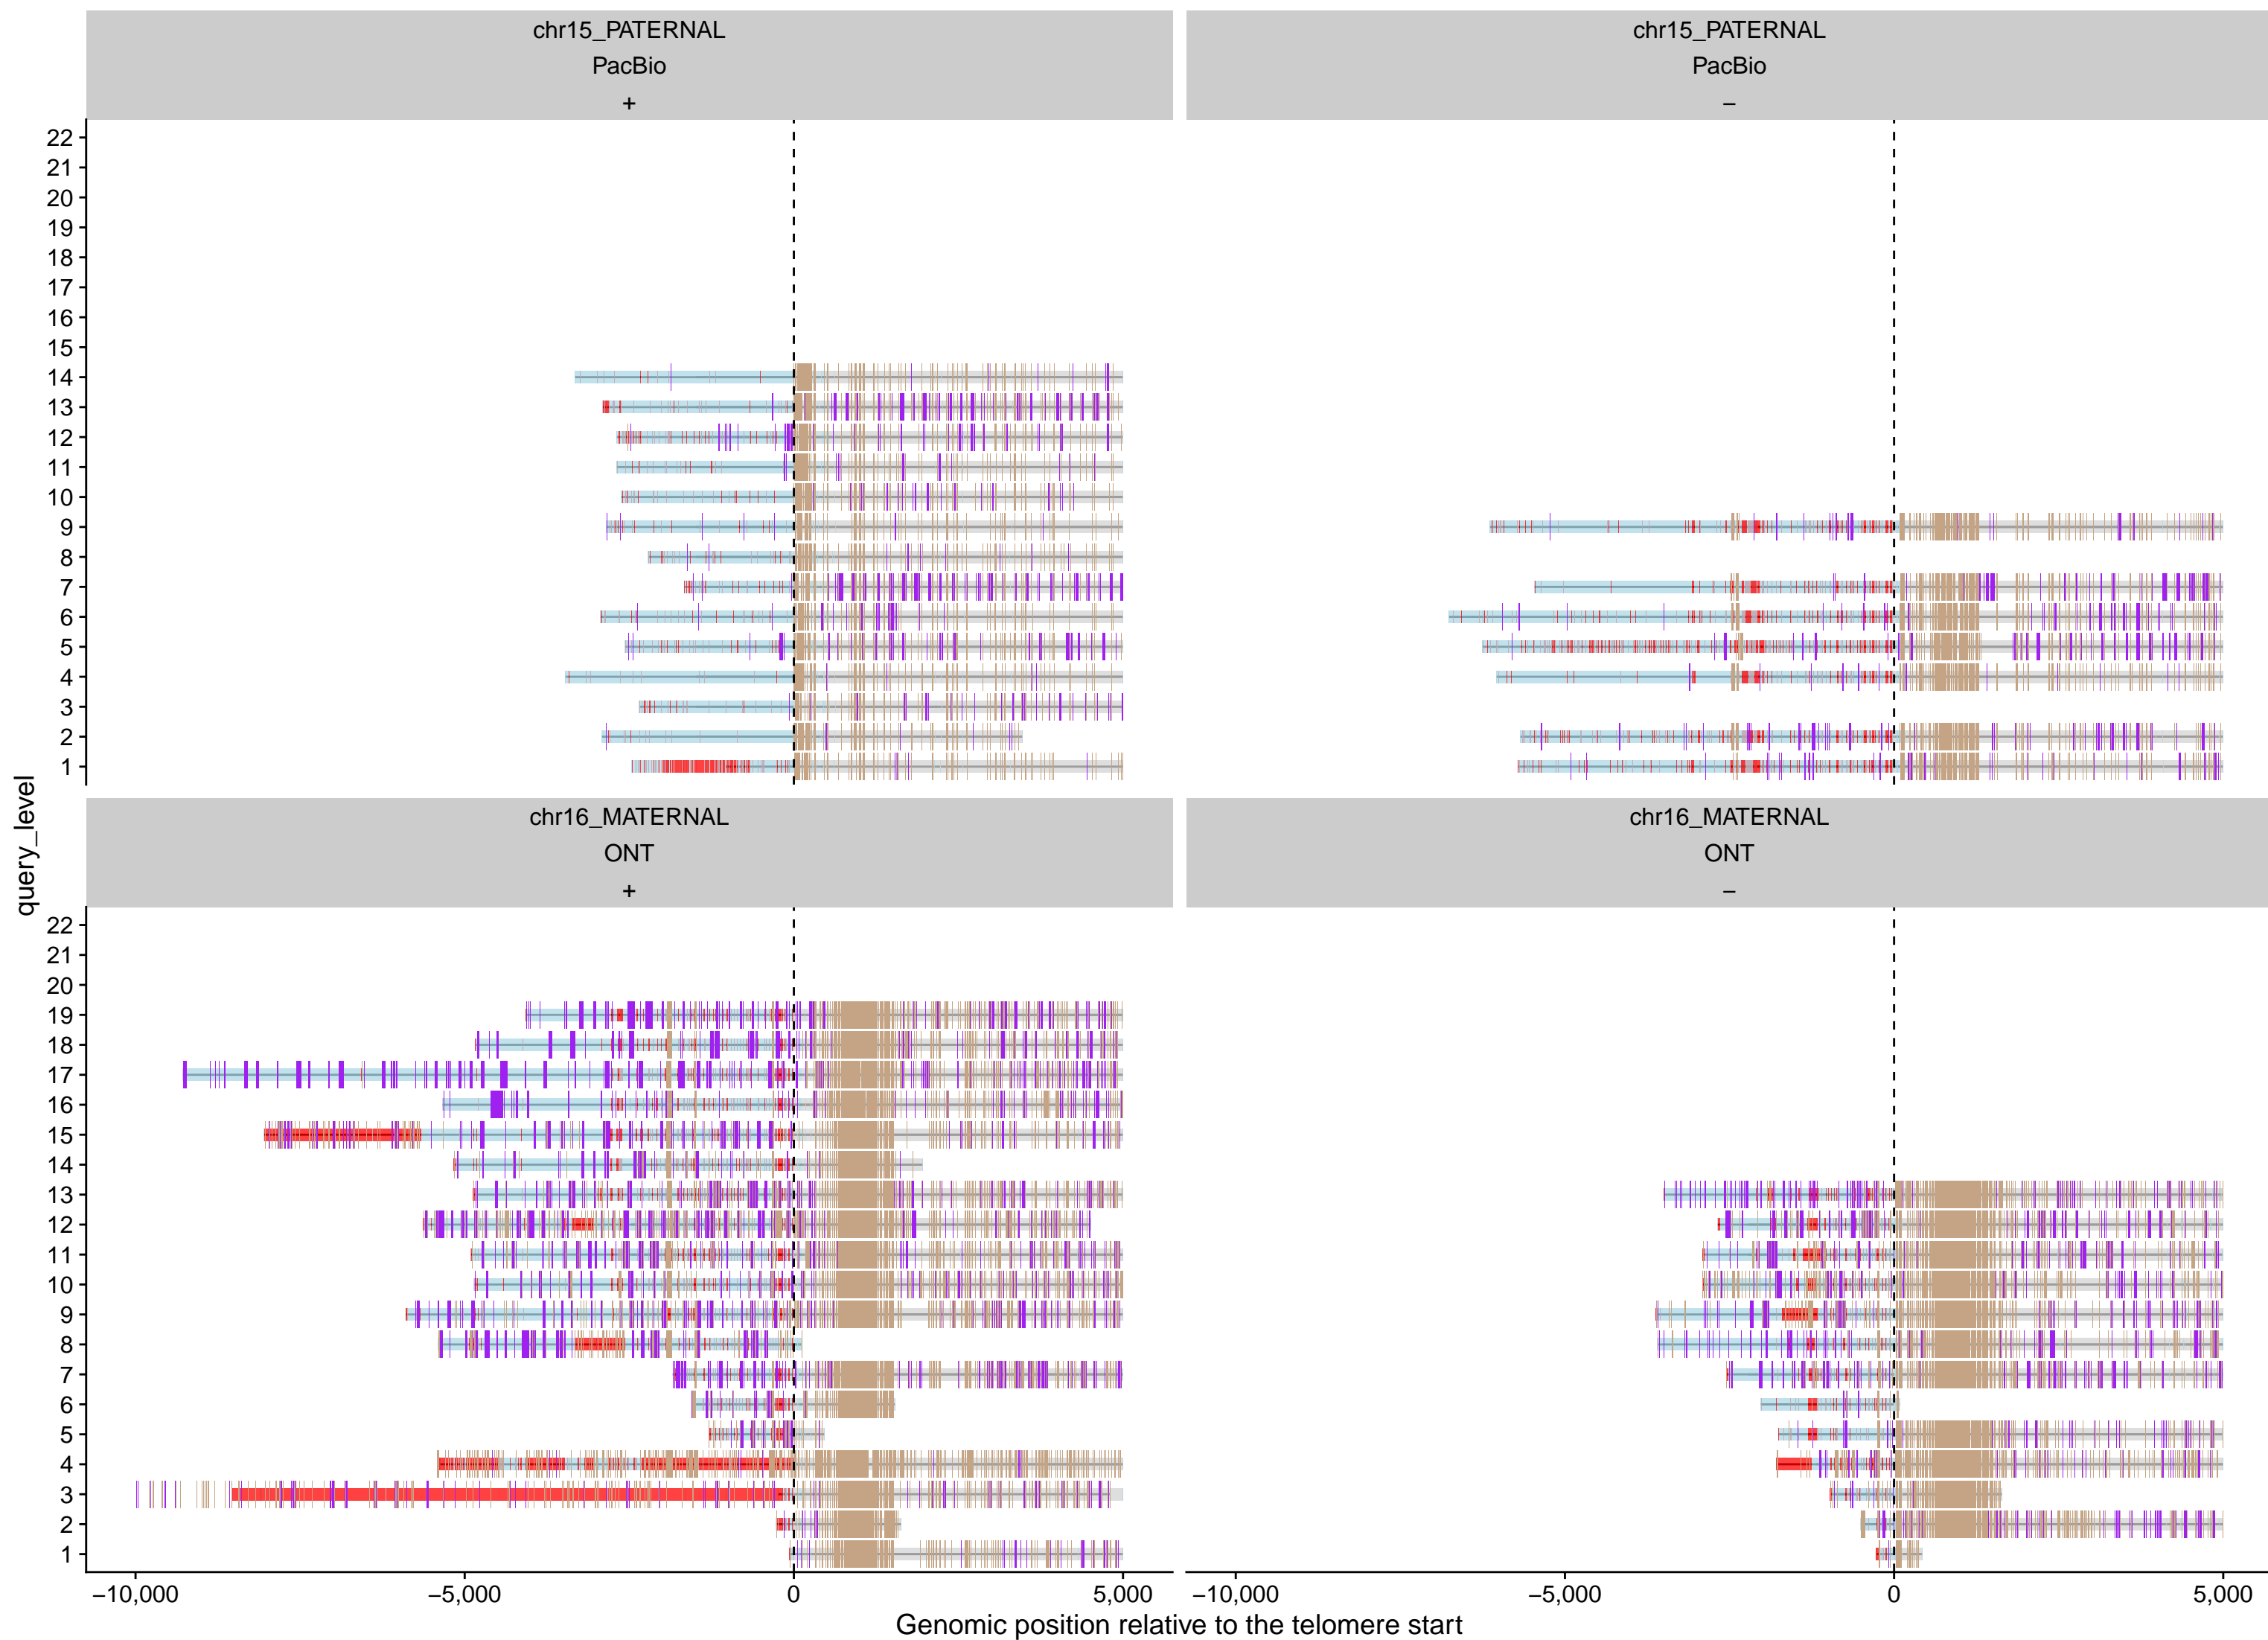

type 5mC DNA m6a NotTelo Telo

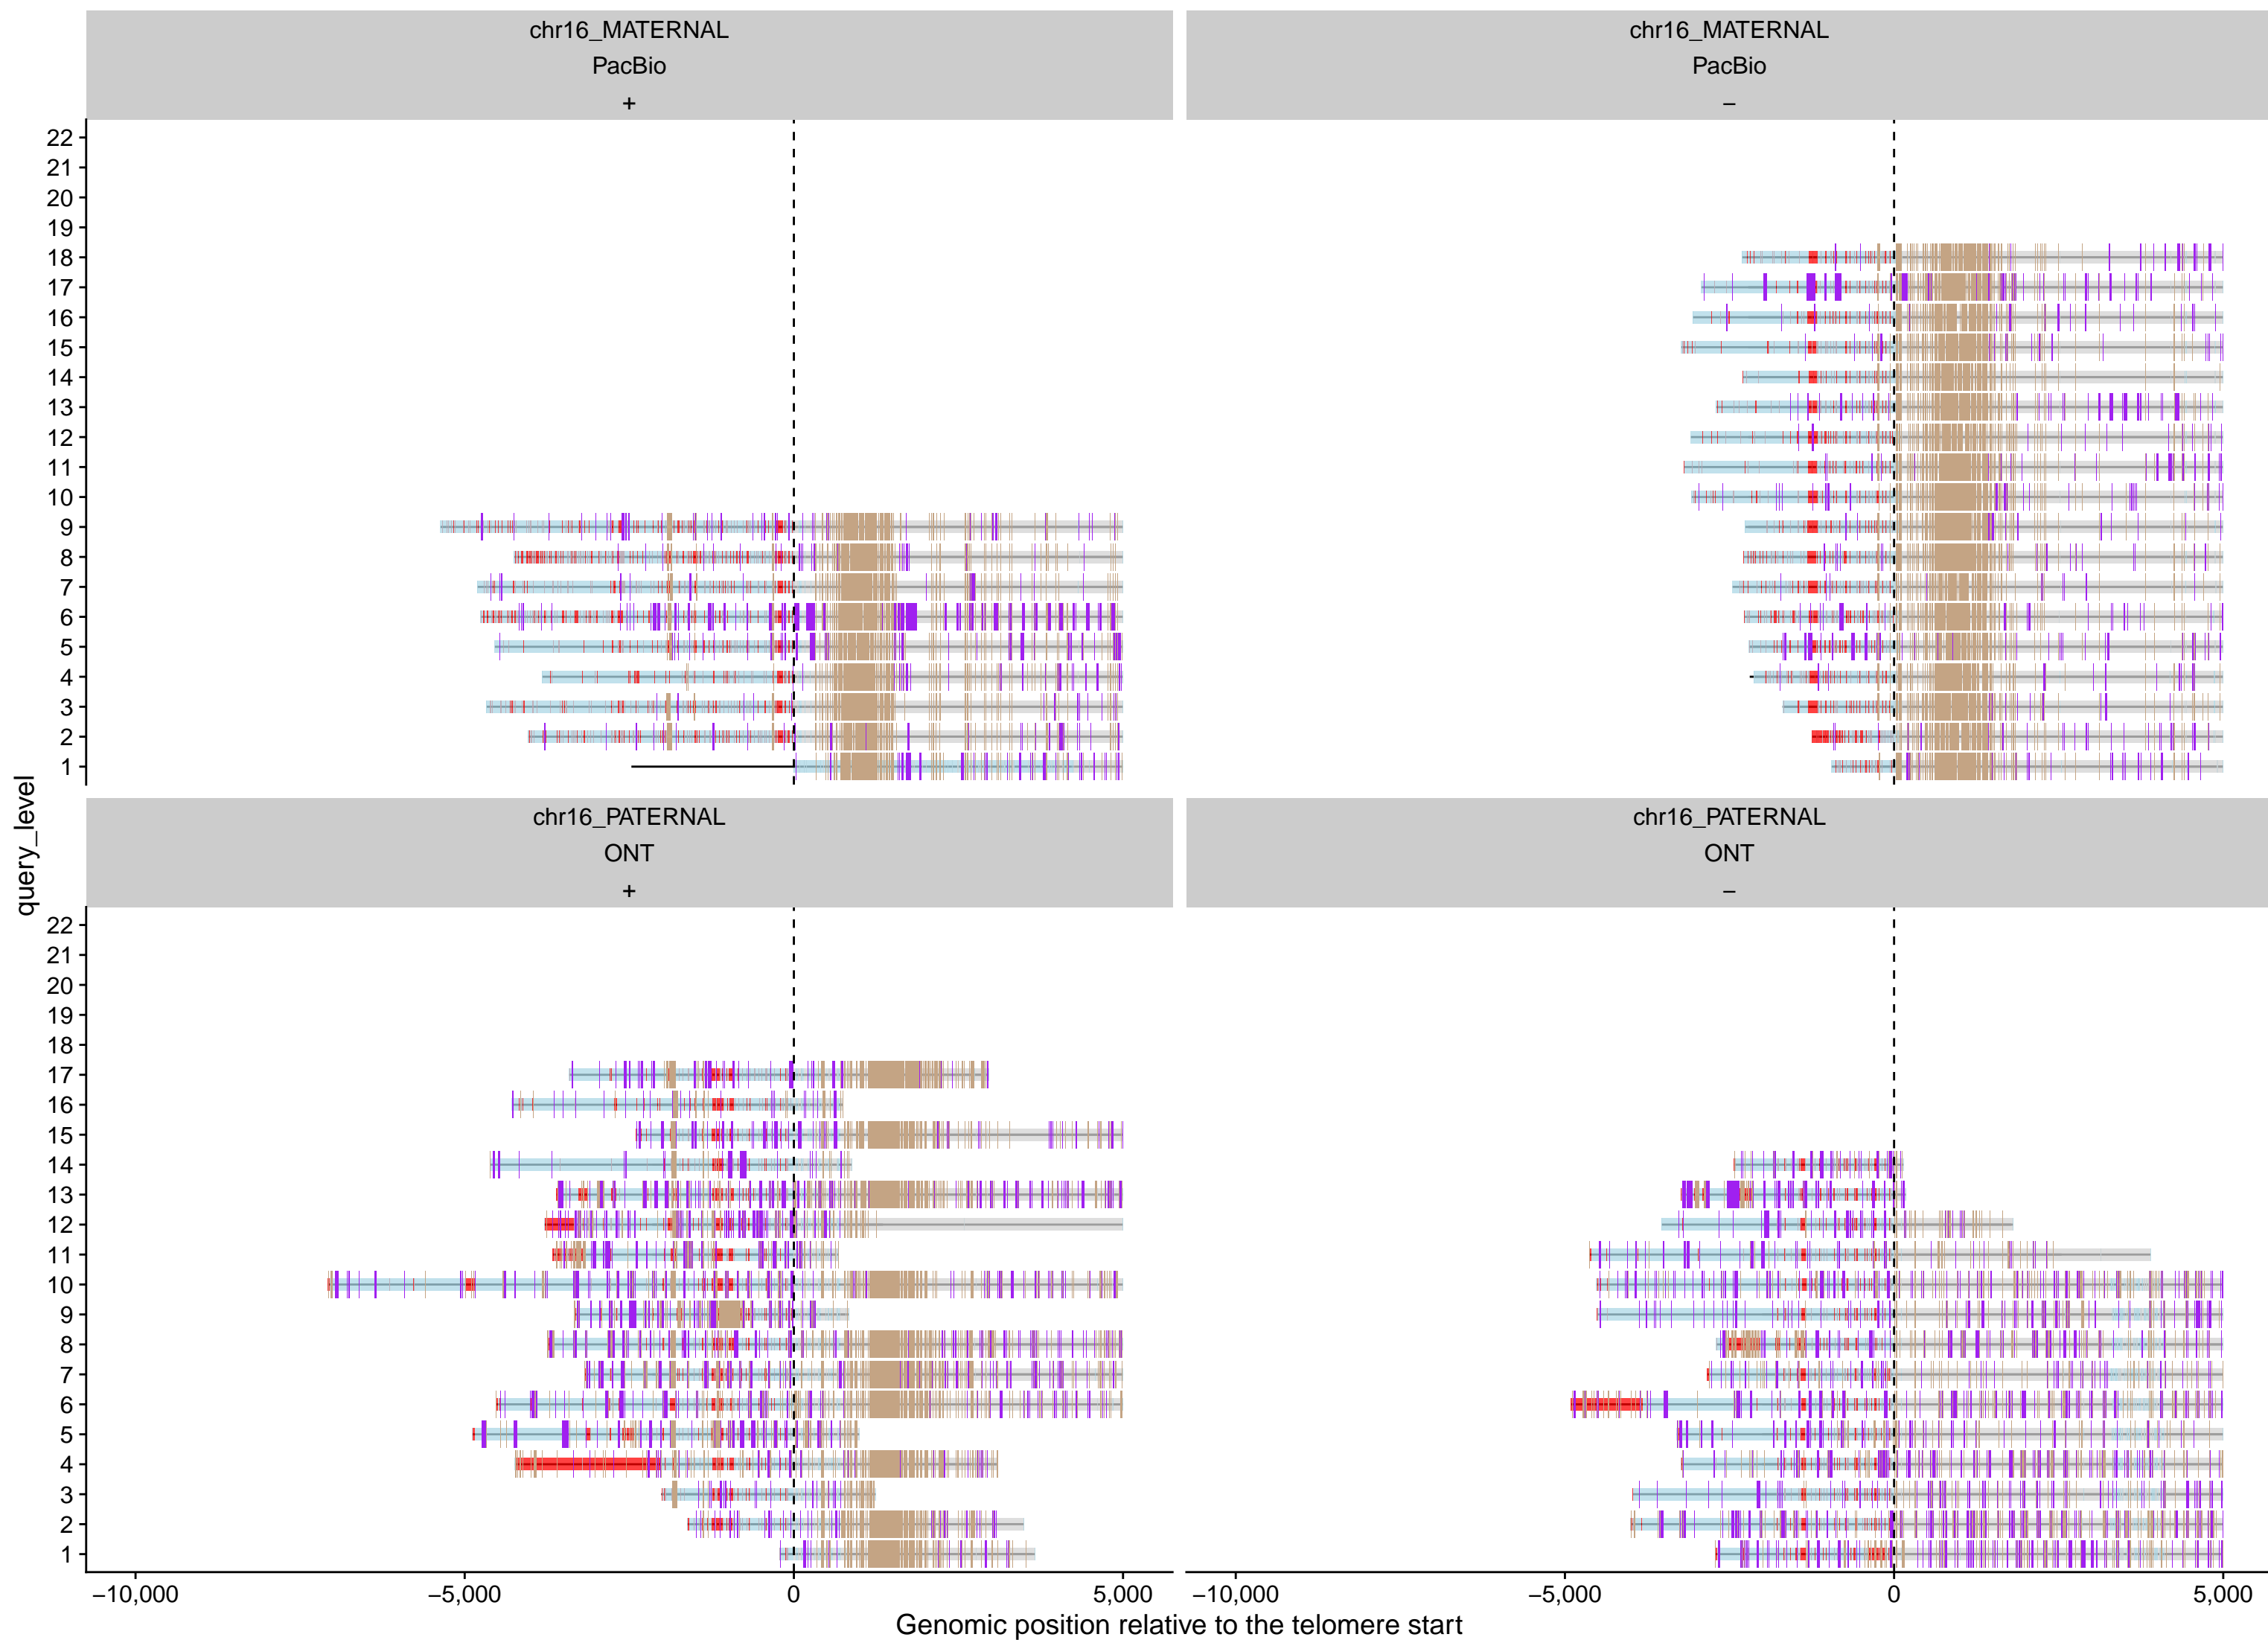

type 5mC DNA m6a NotTelo Telo

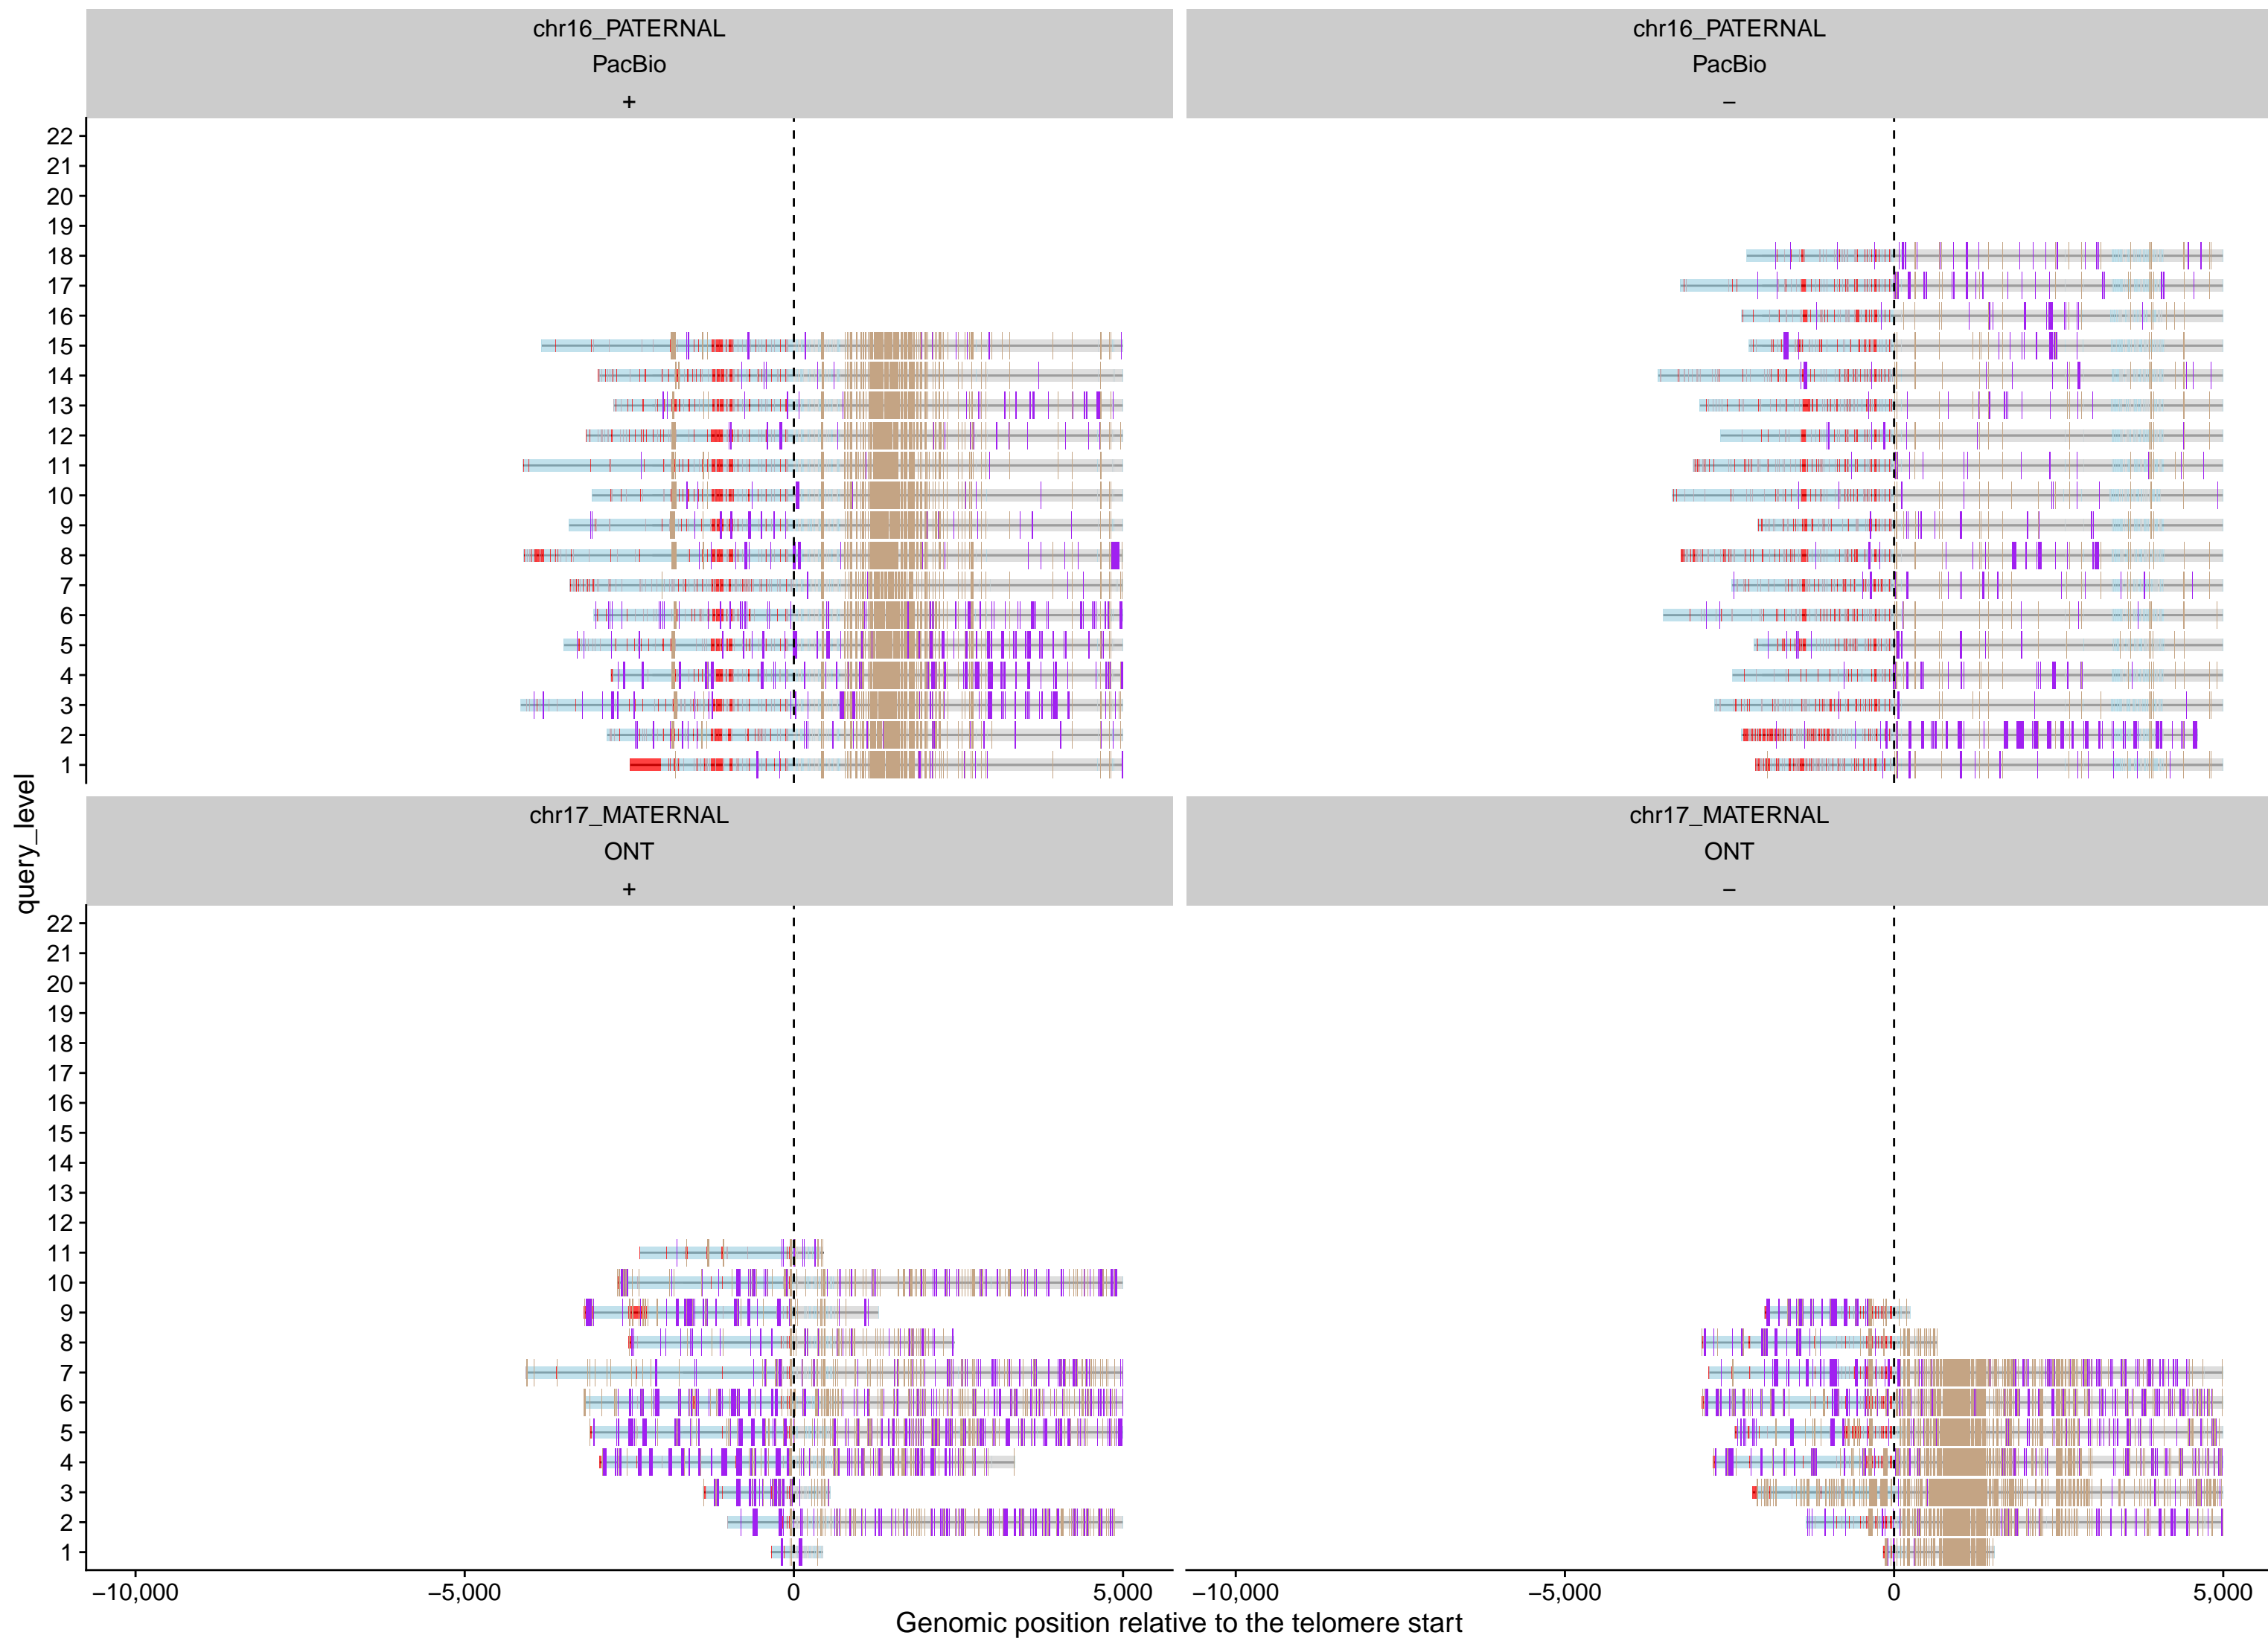

type 5mC DNA m6a NotTelo Telo

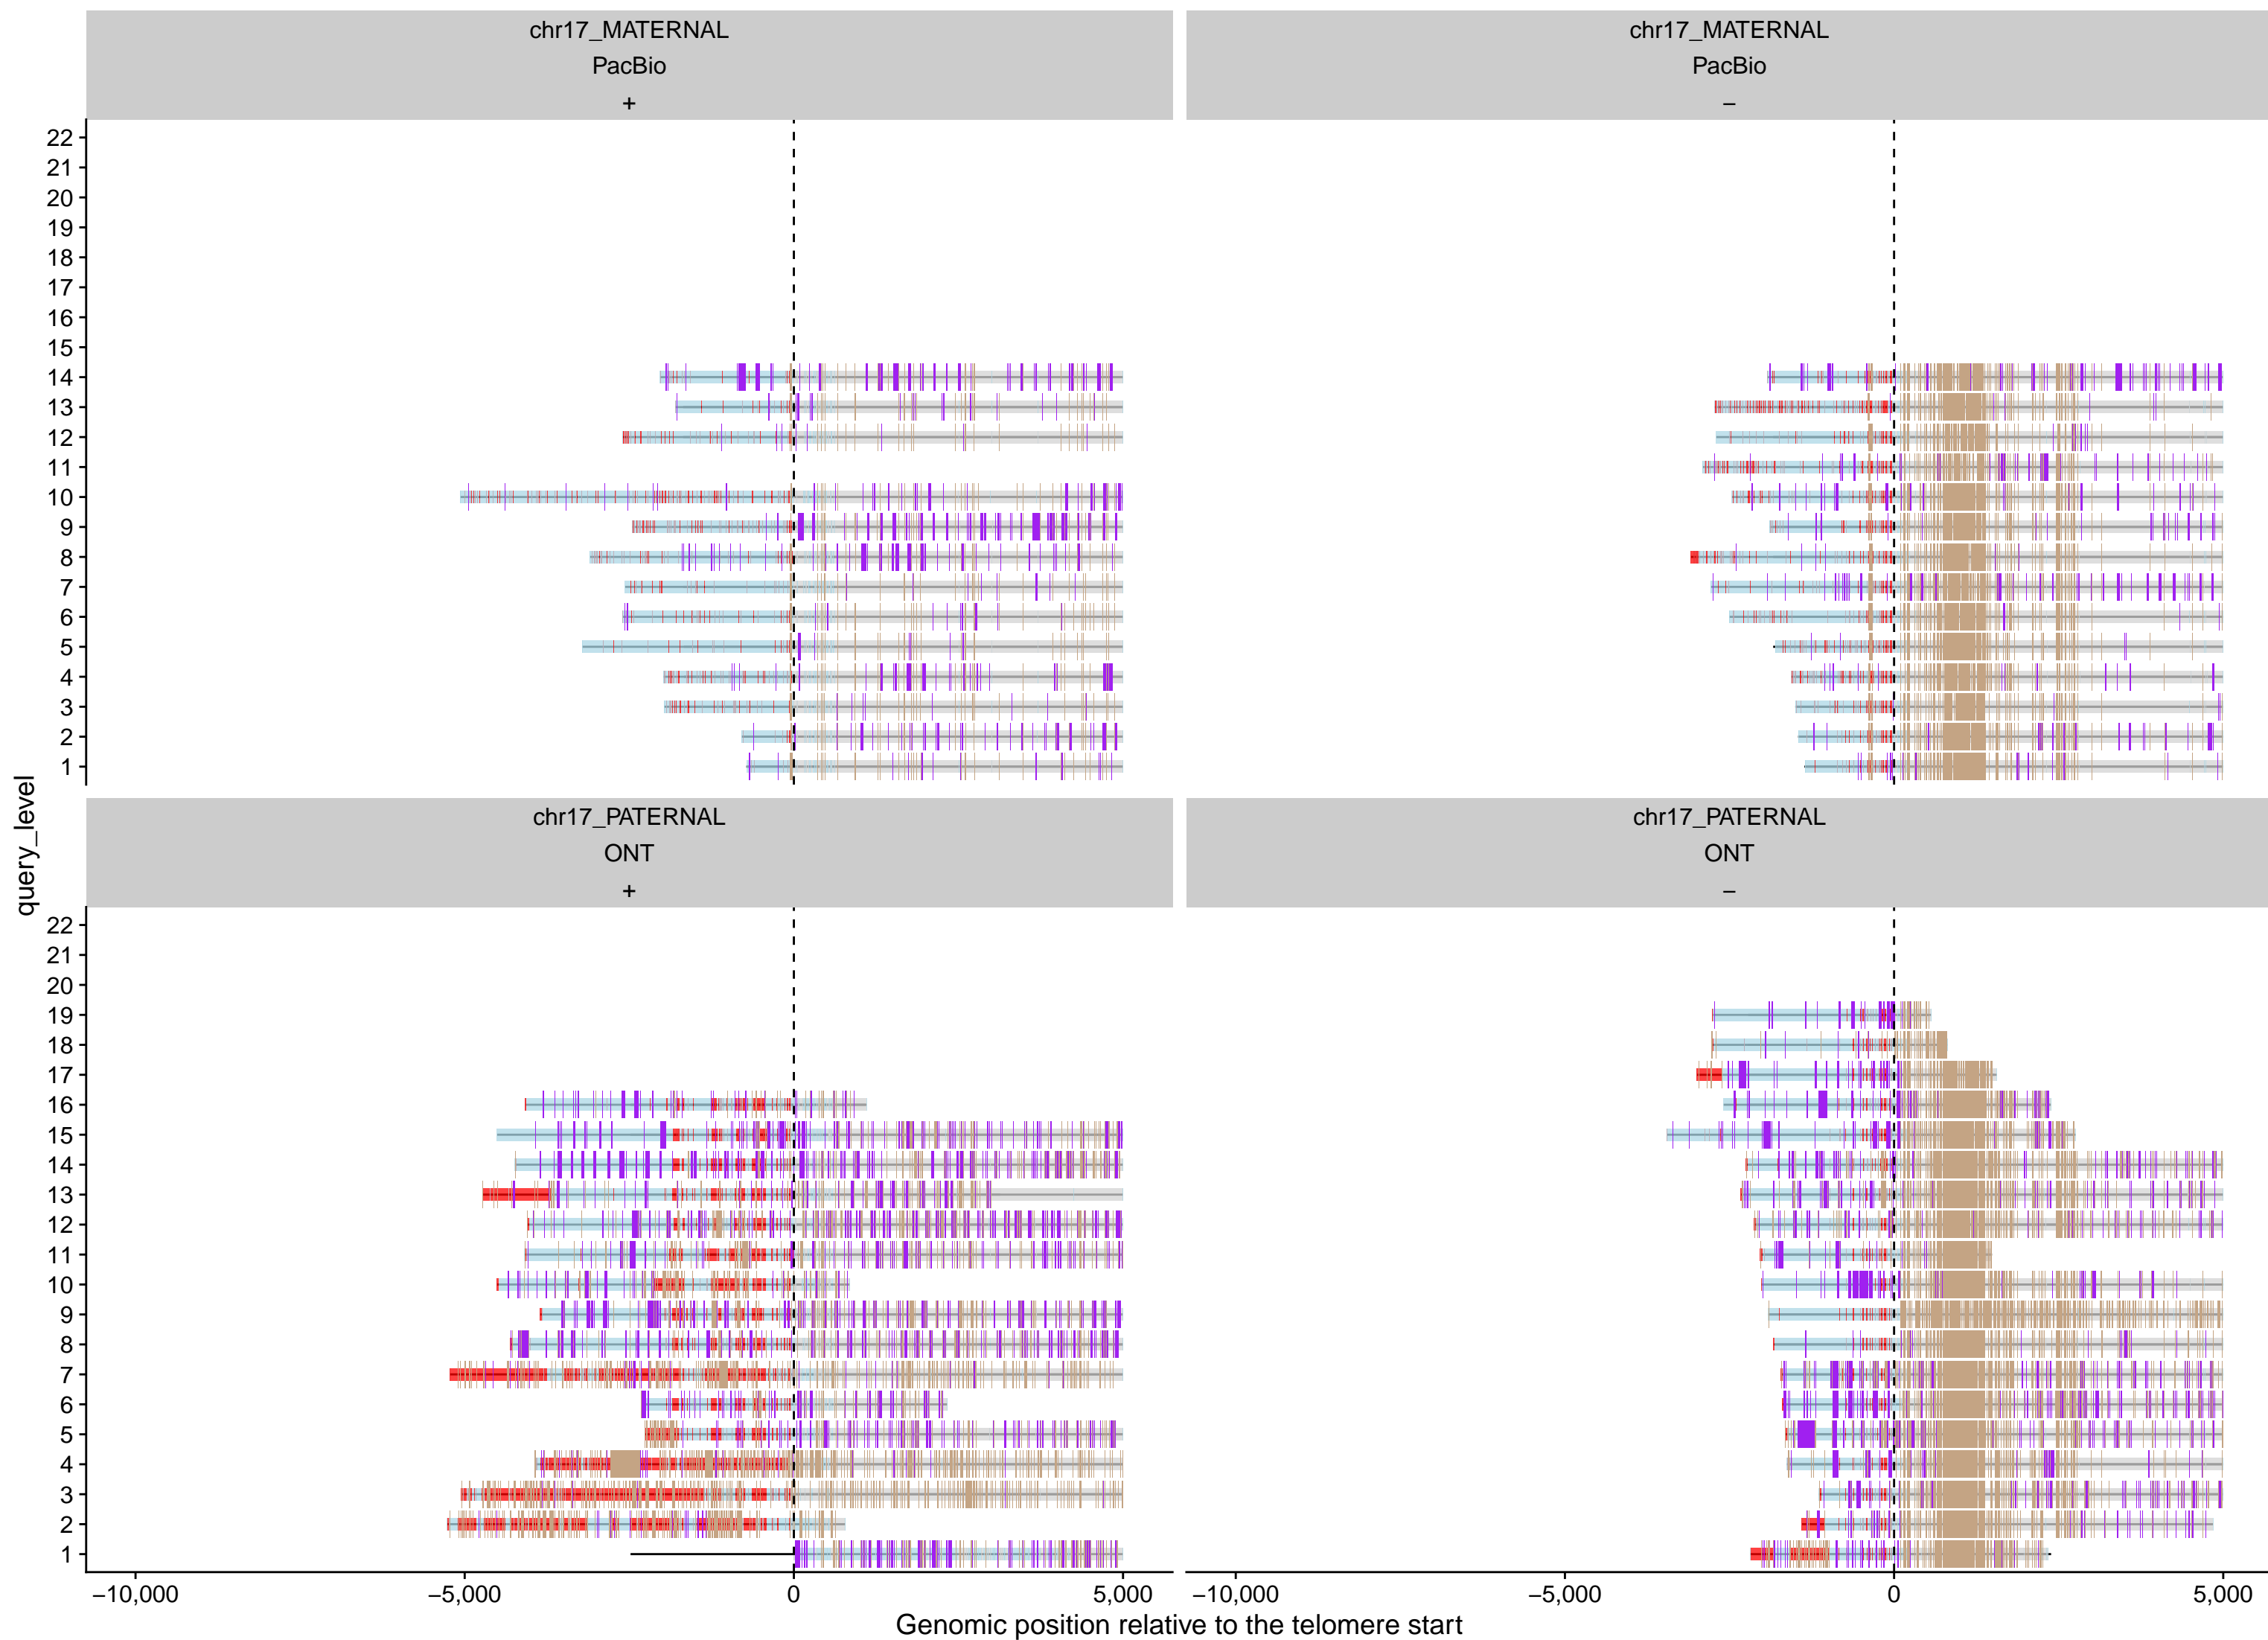

type 5mC DNA m6a NotTelo Telo

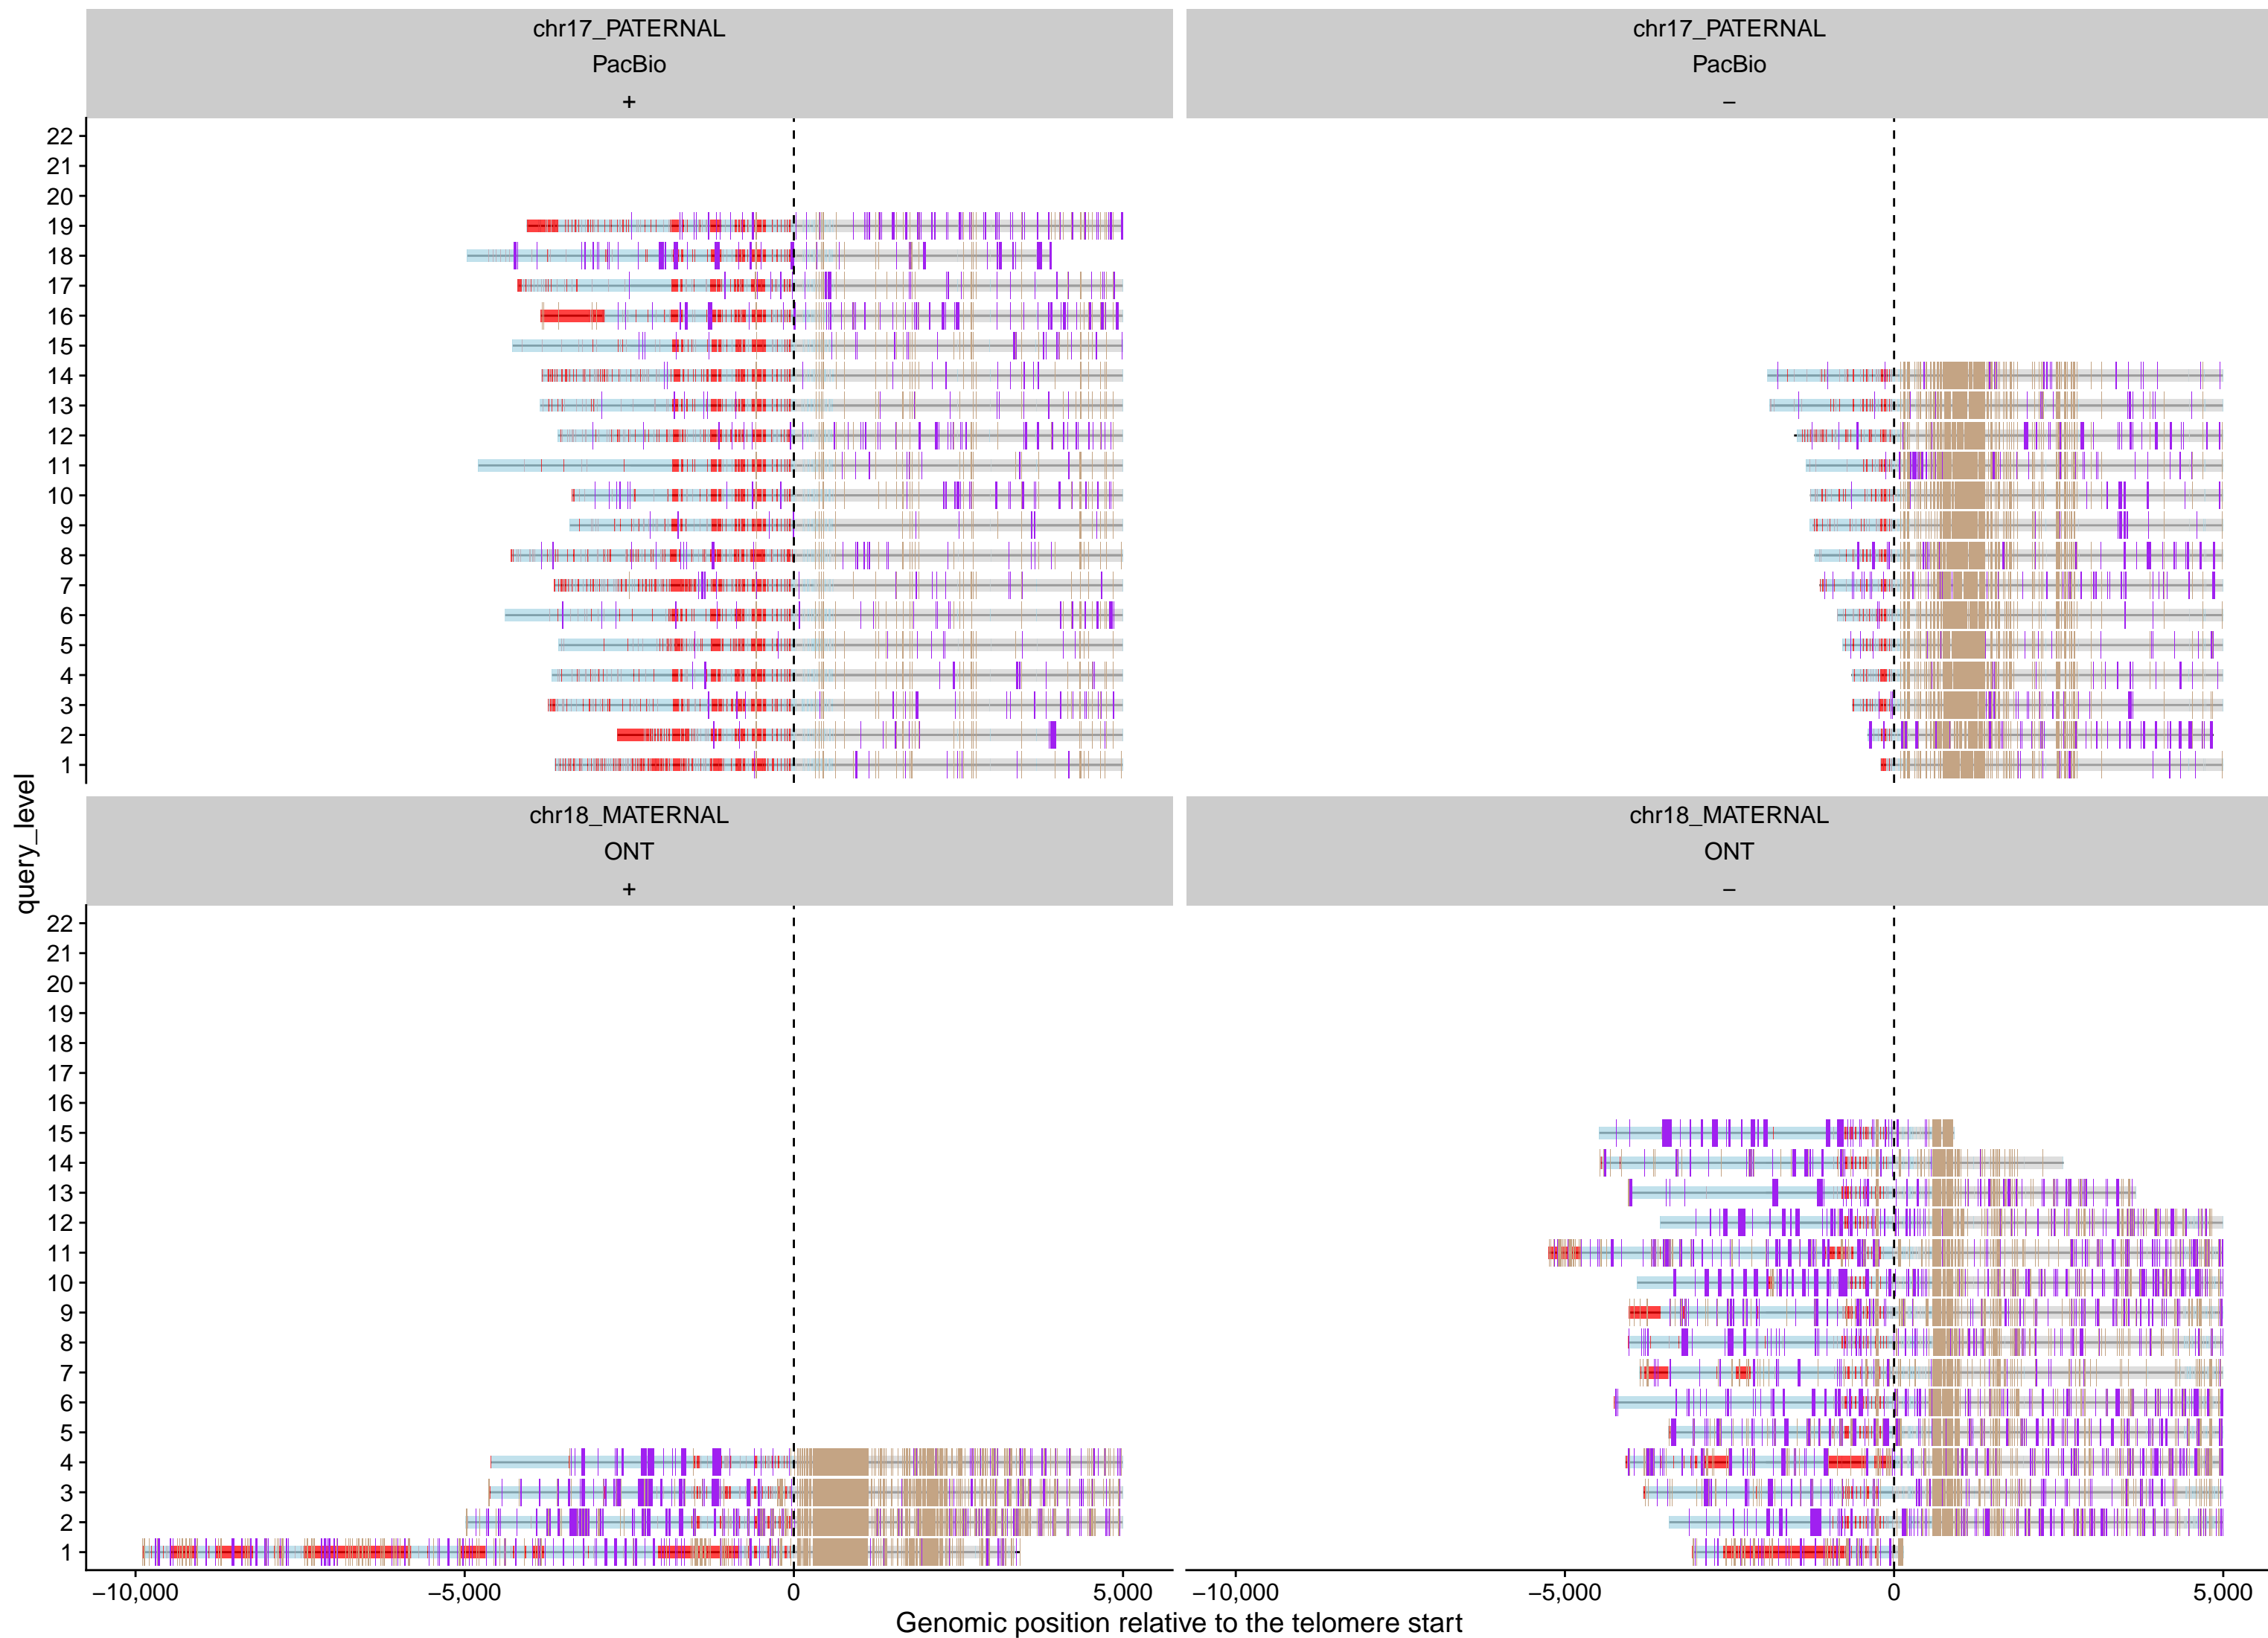

type 5mC DNA m6a NotTelo Telo

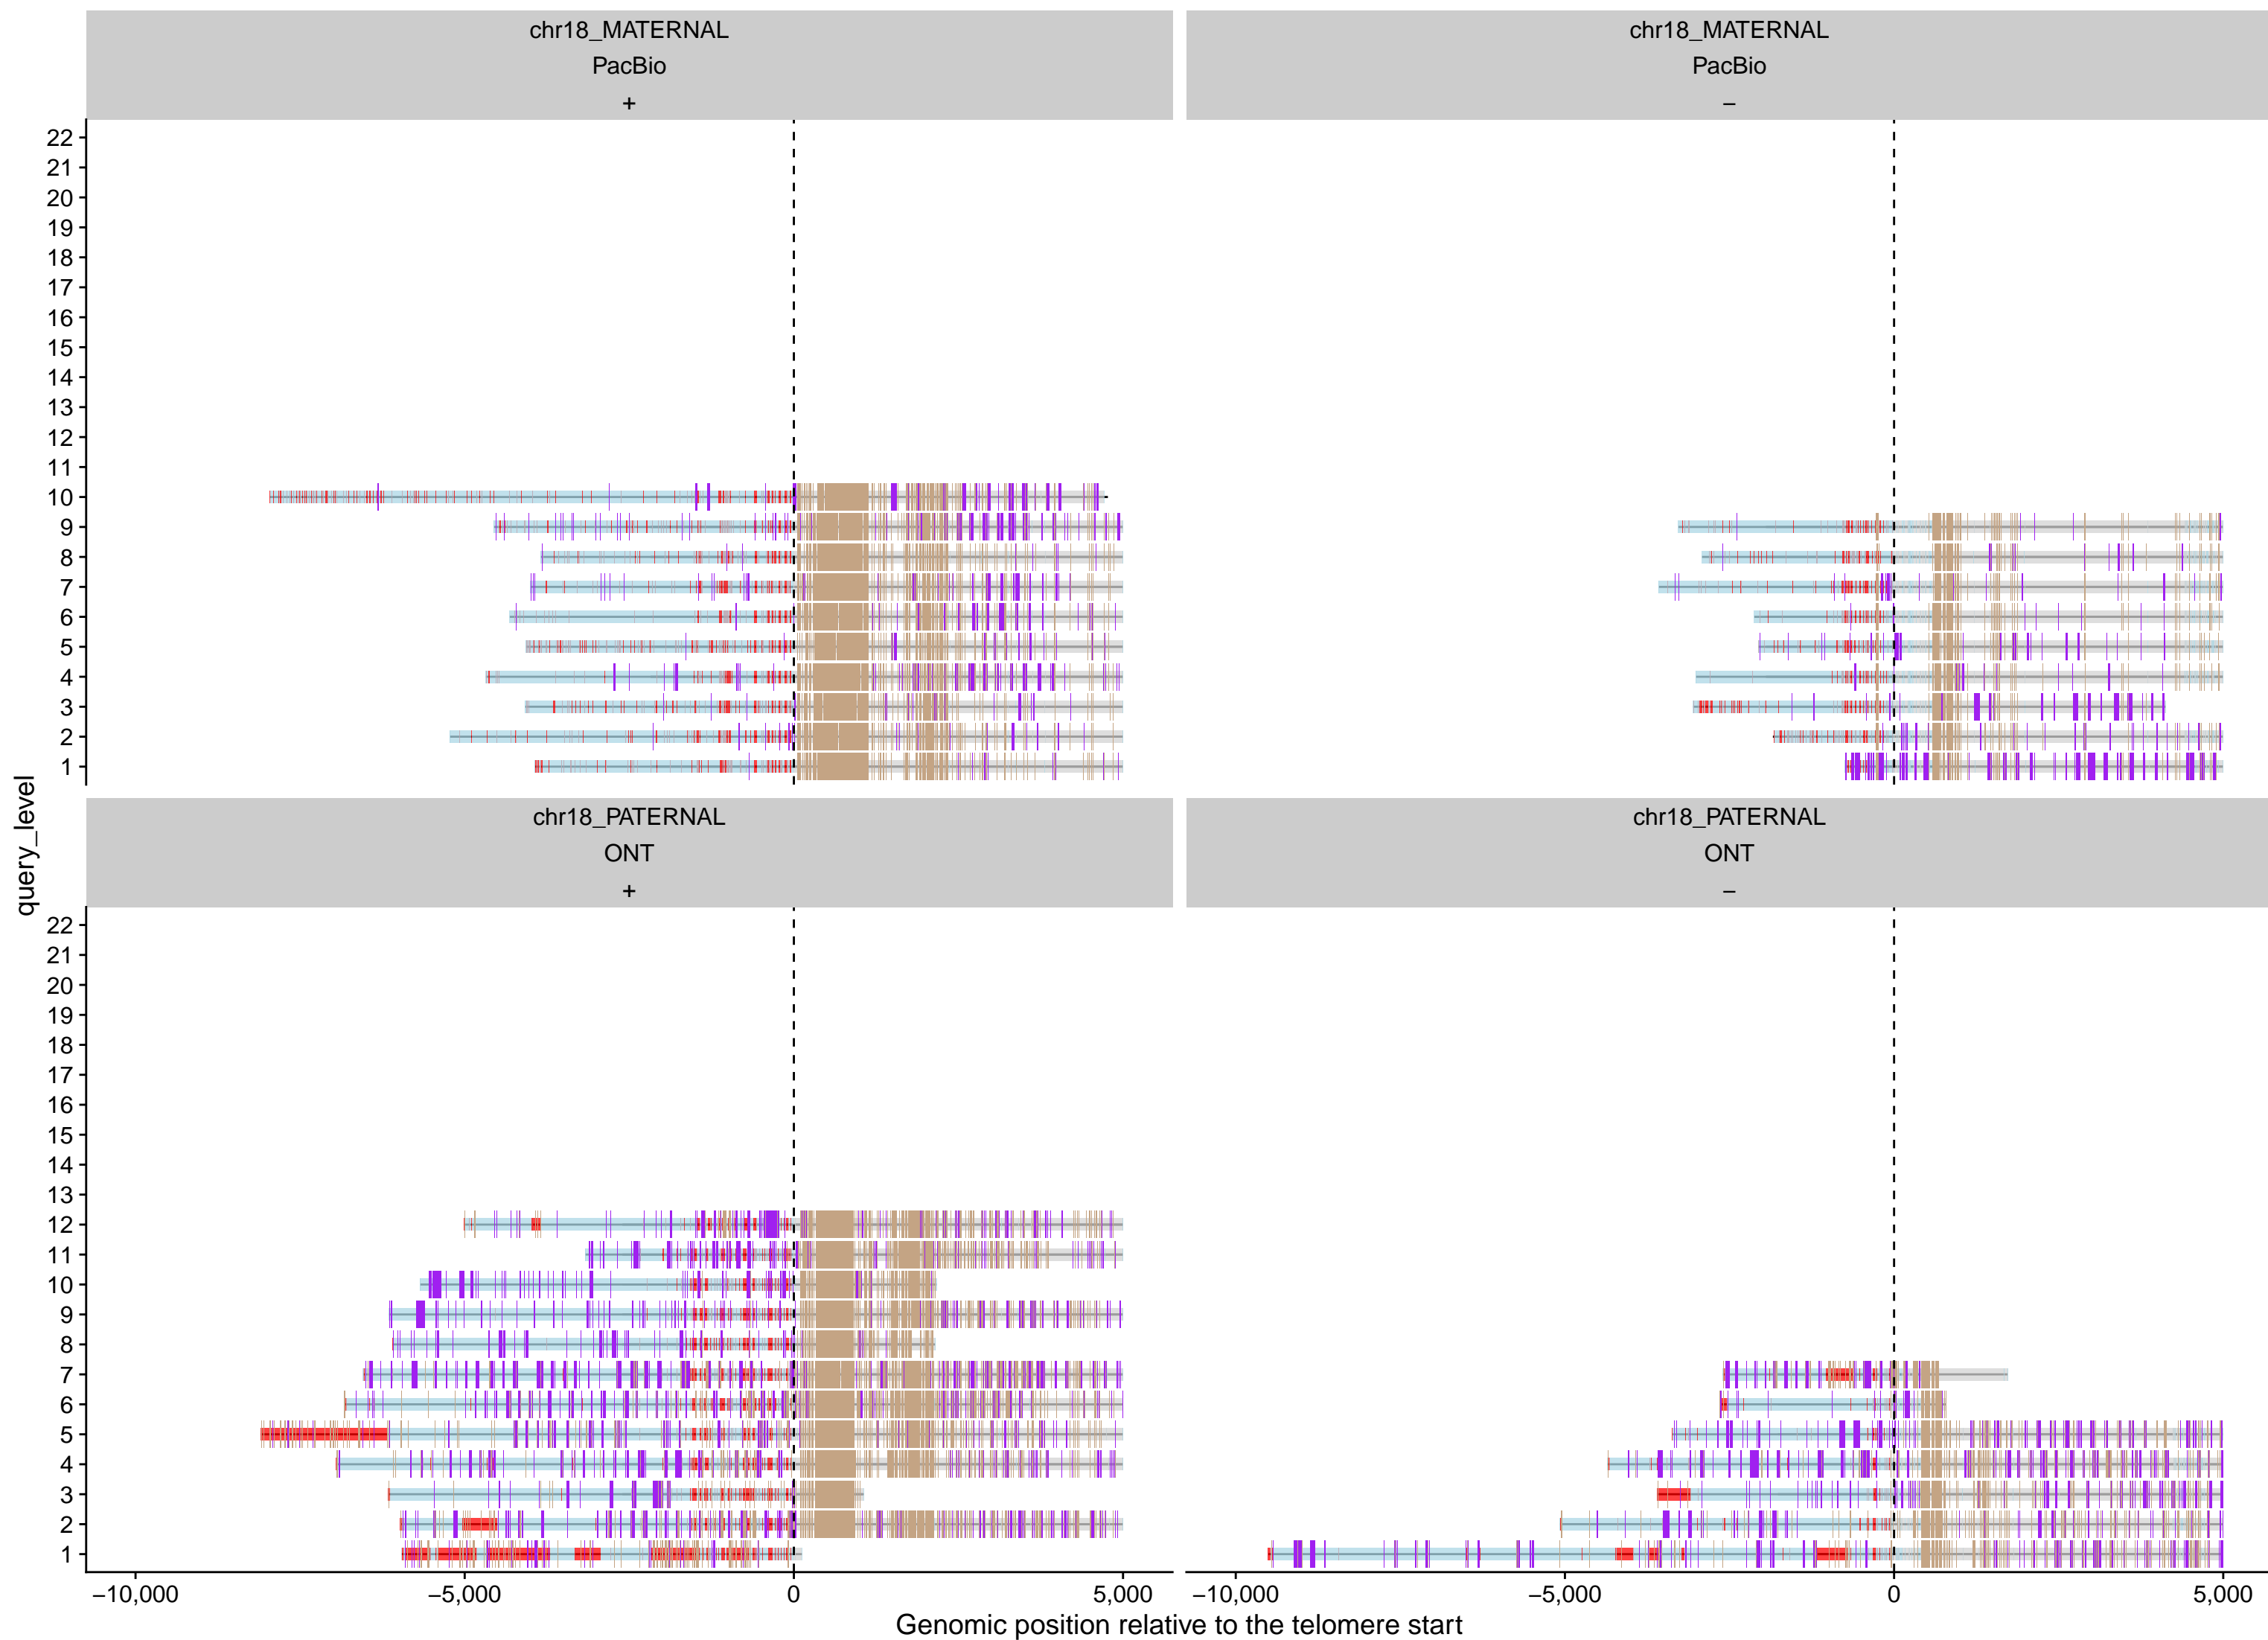

type 5mC DNA m6a NotTelo Telo

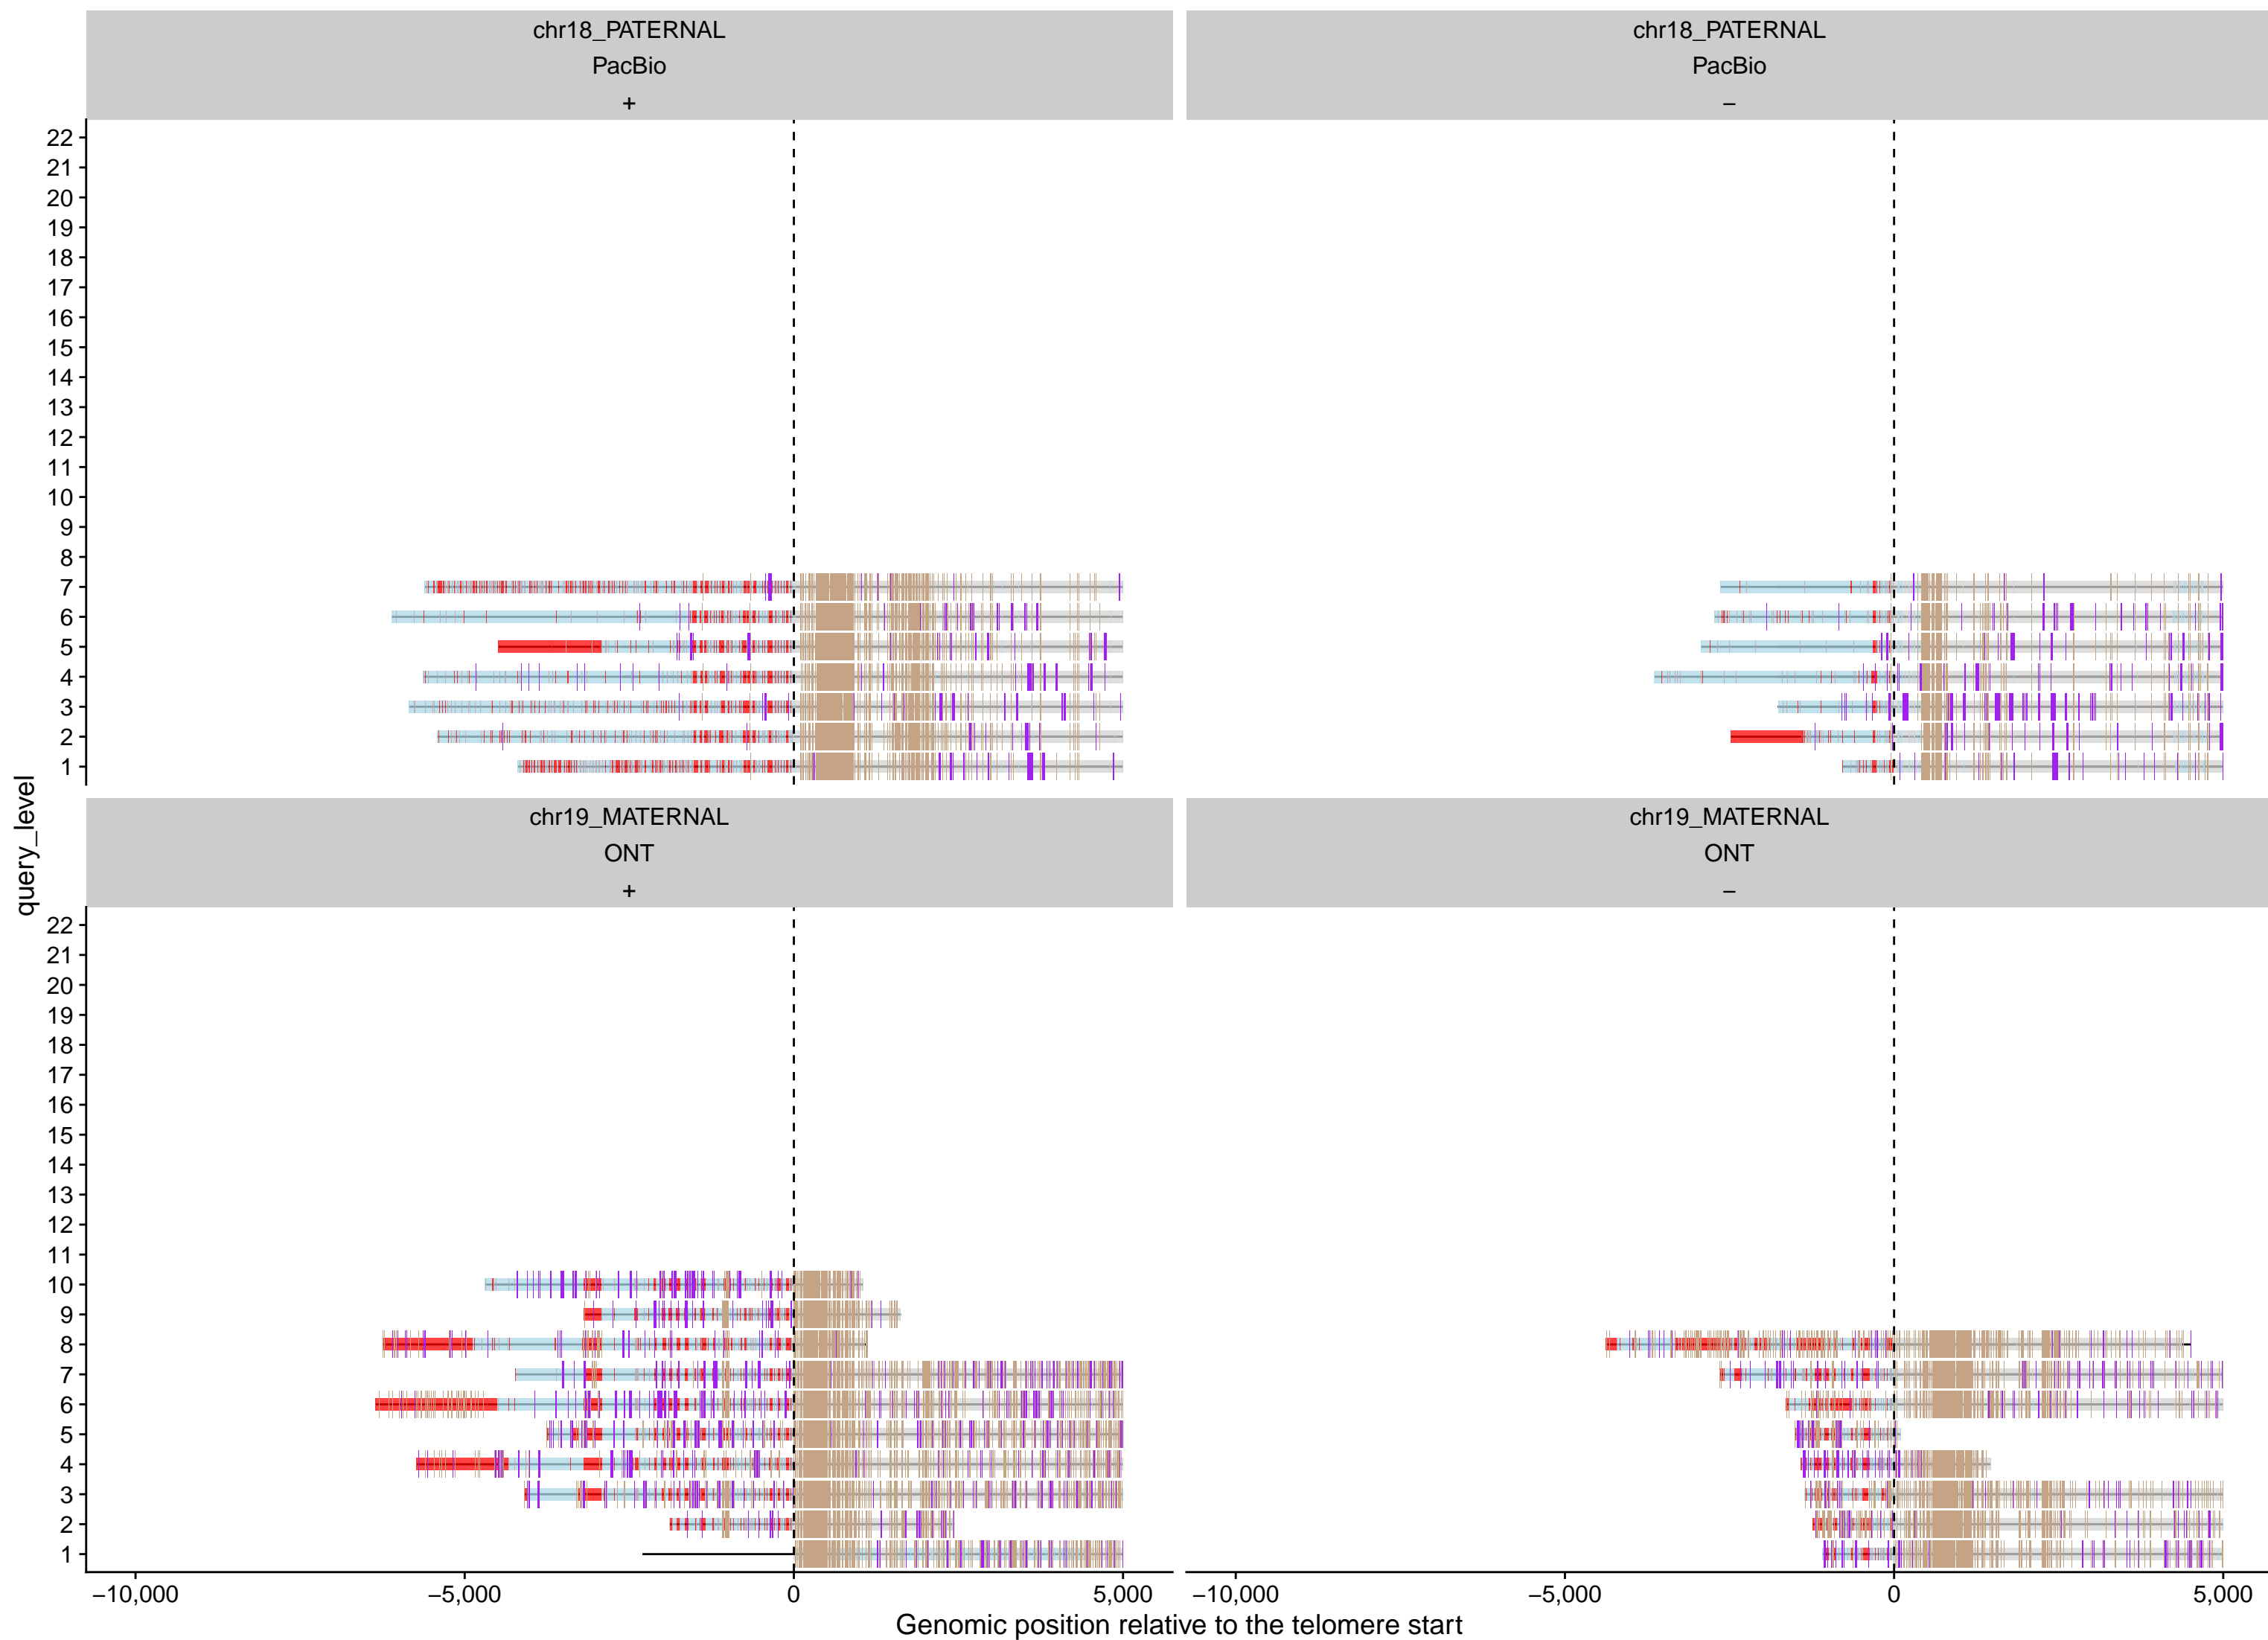

type 5mC DNA m6a NotTelo Telo

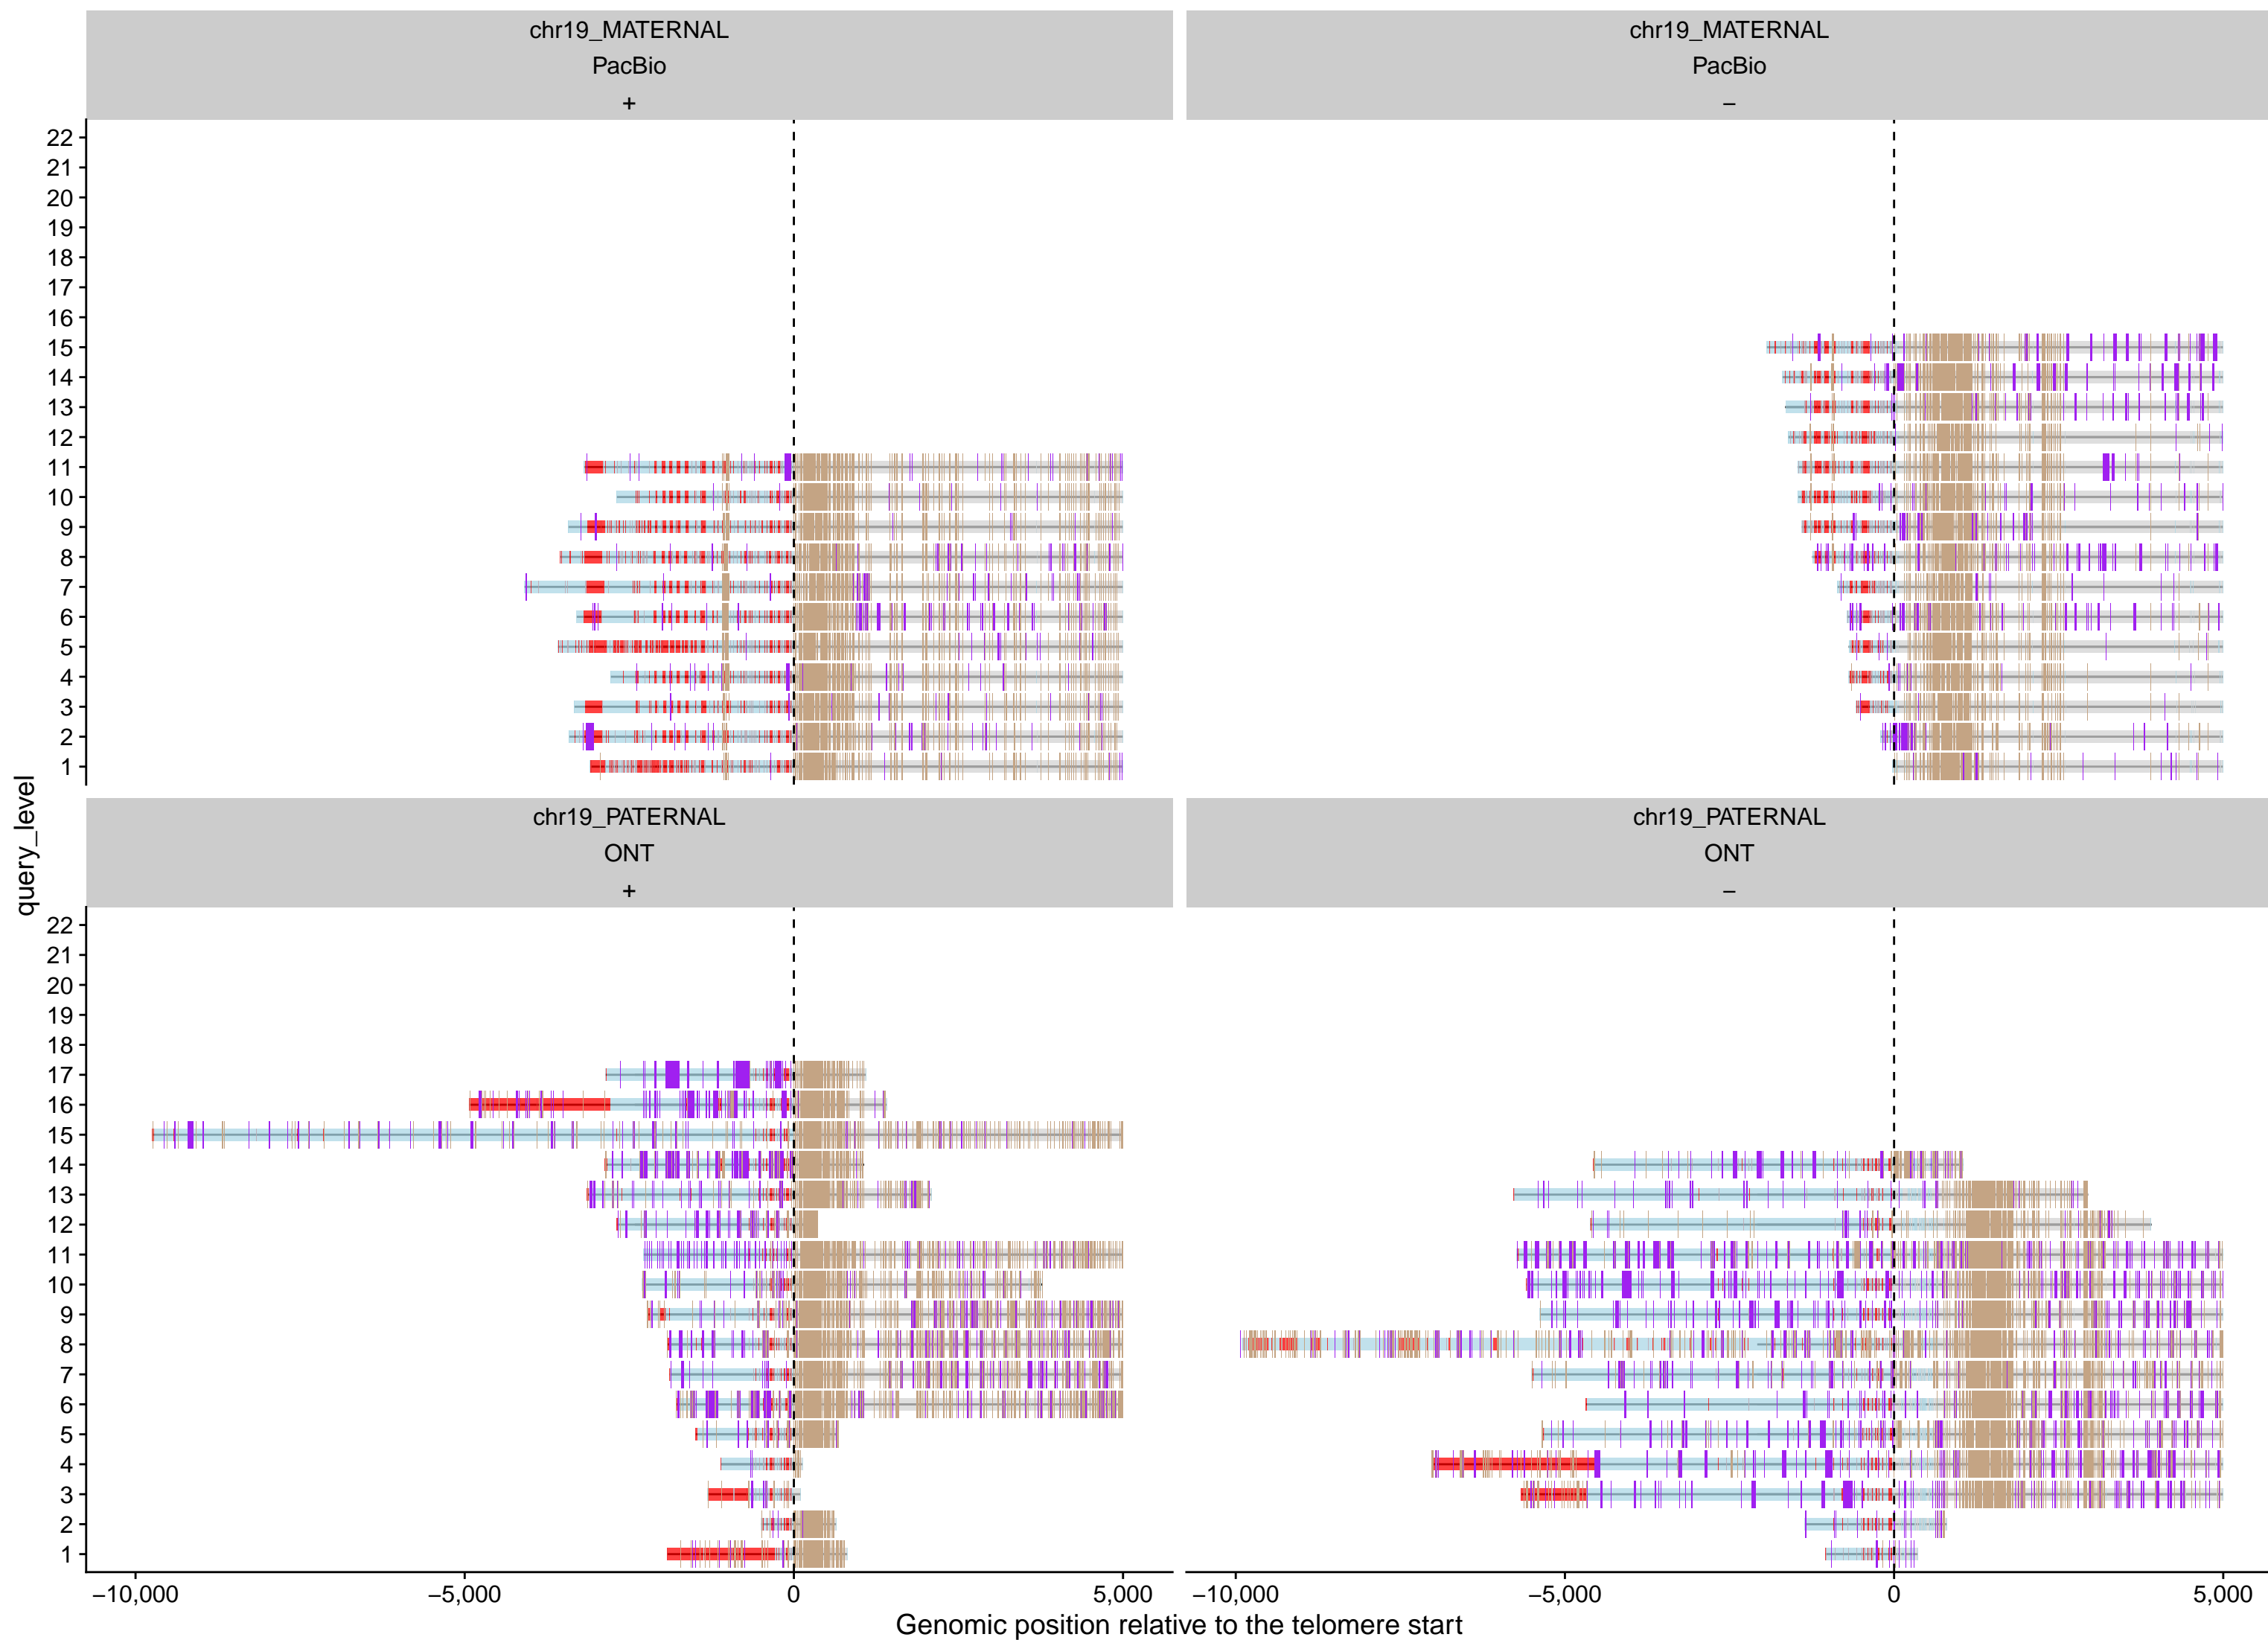

type 5mC DNA m6a NotTelo Telo

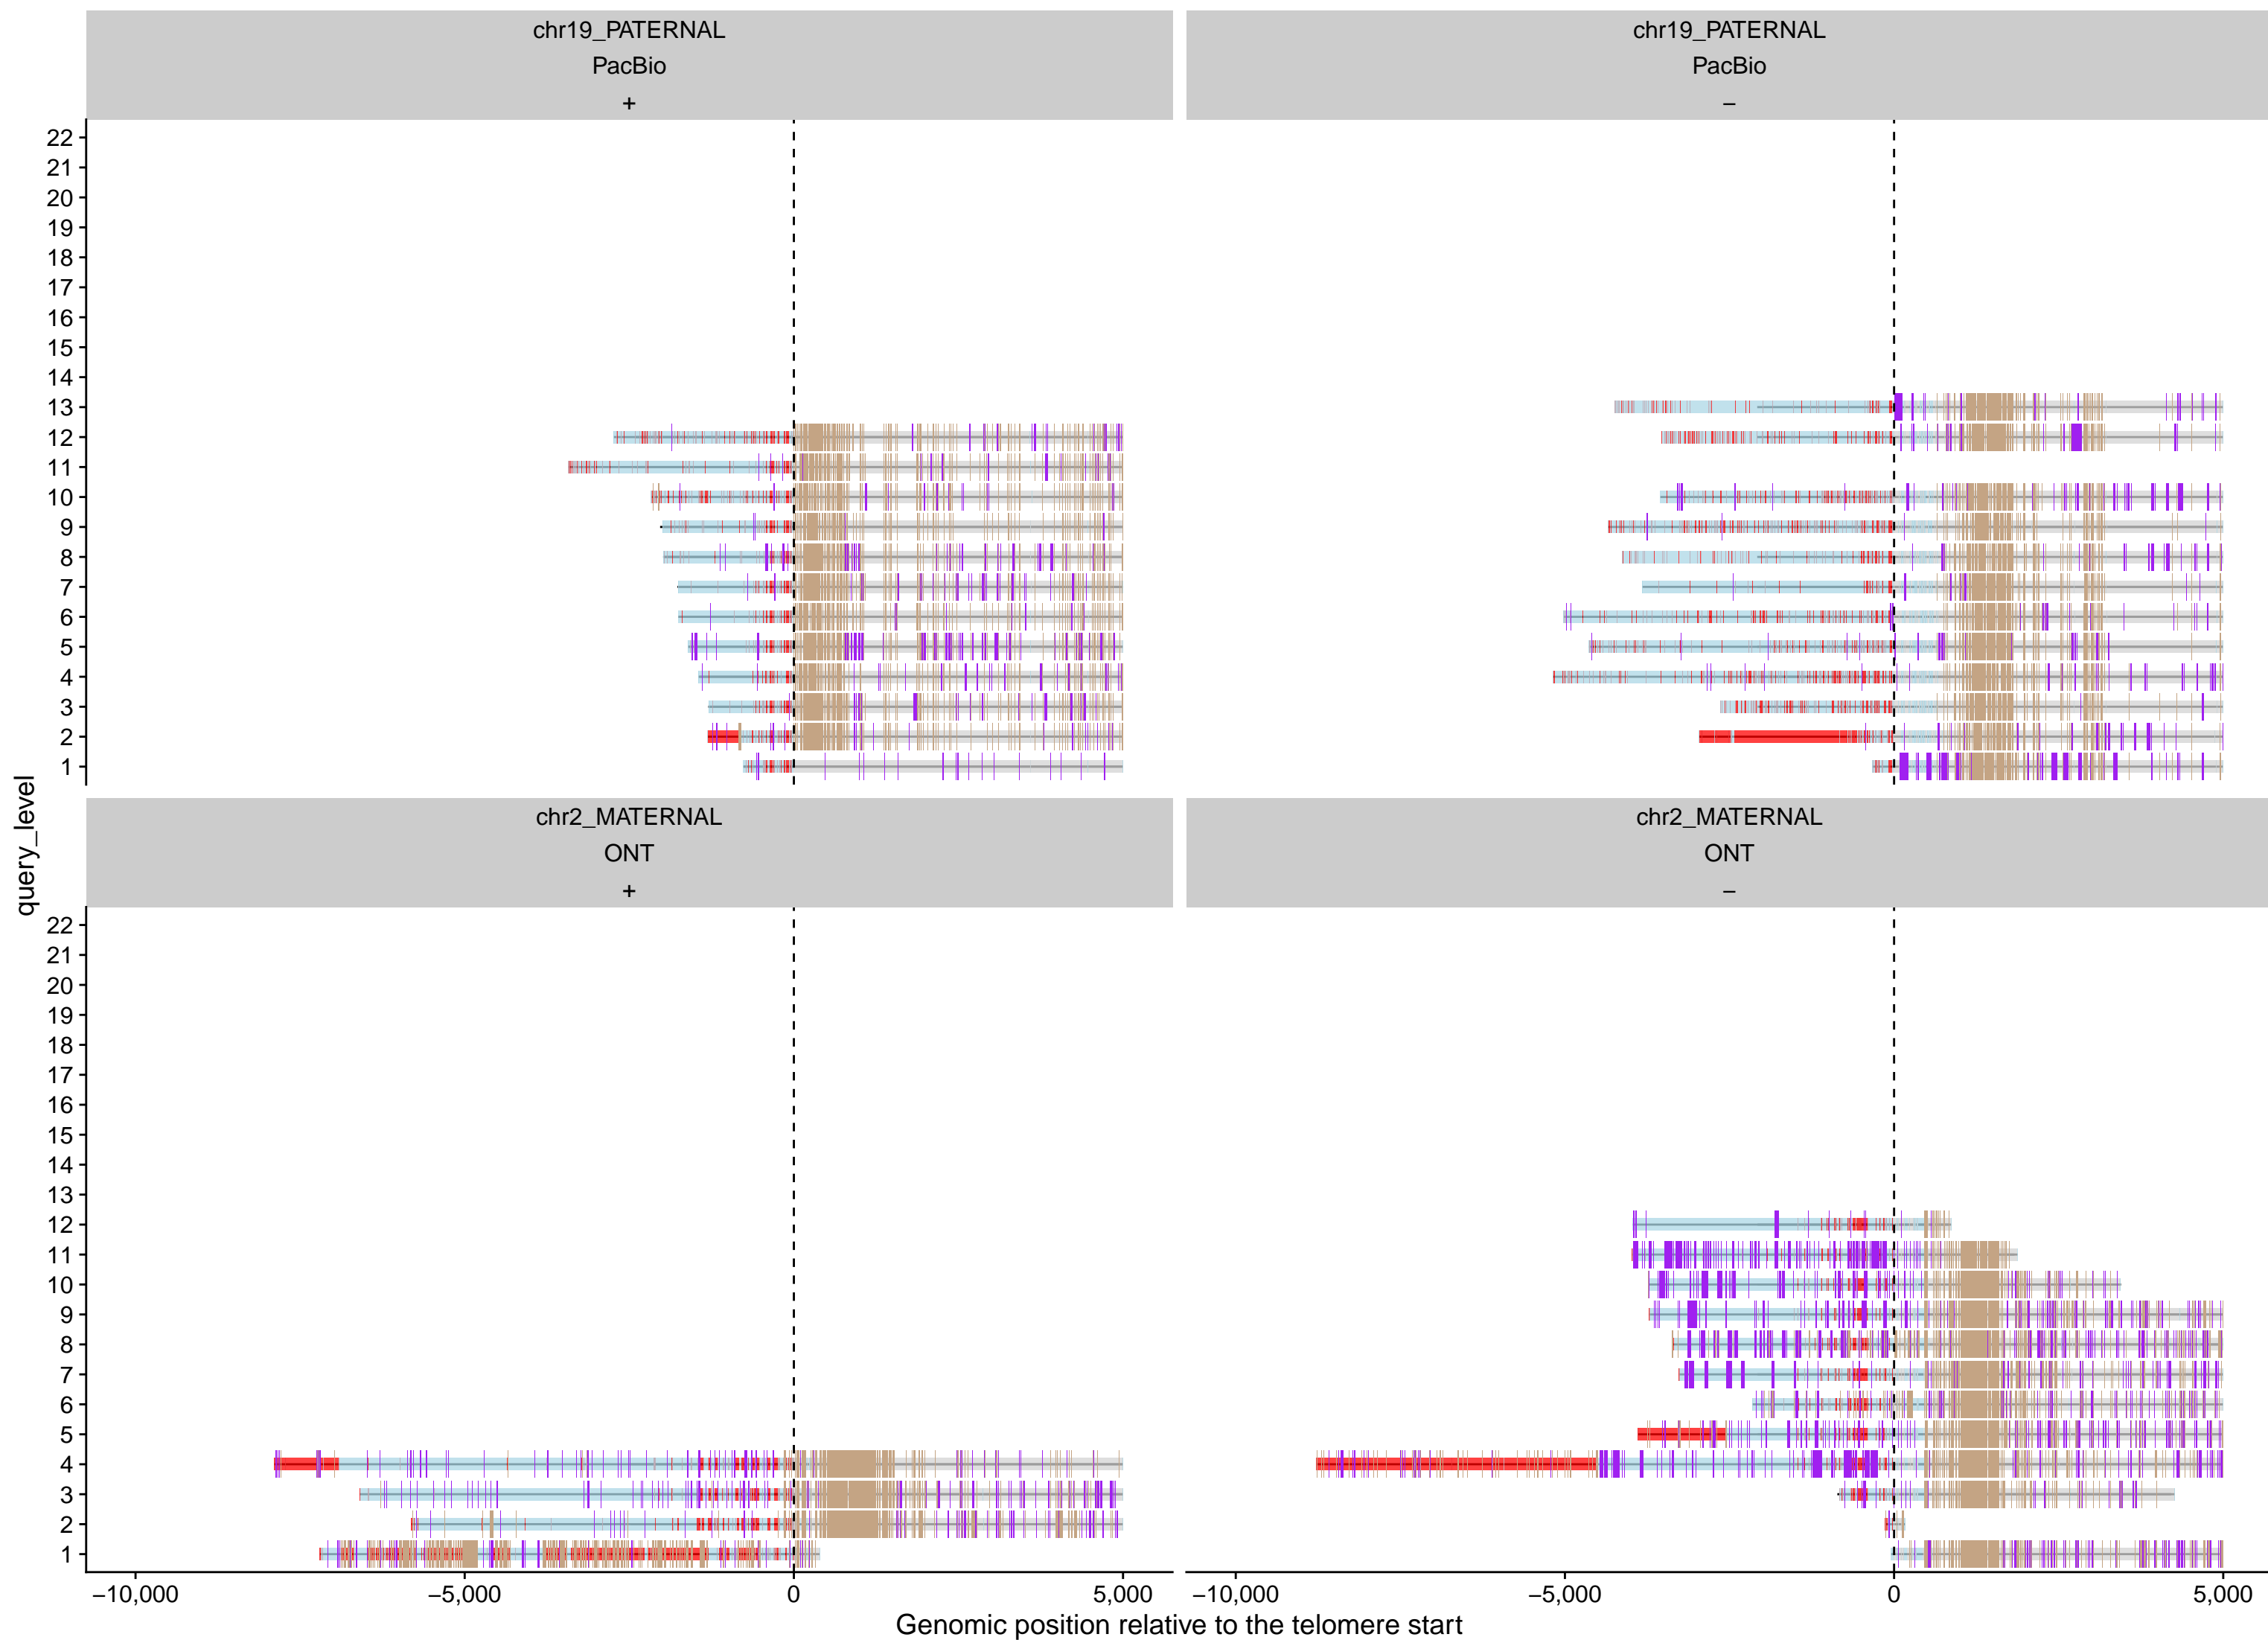

type 5mC DNA m6a NotTelo Telo

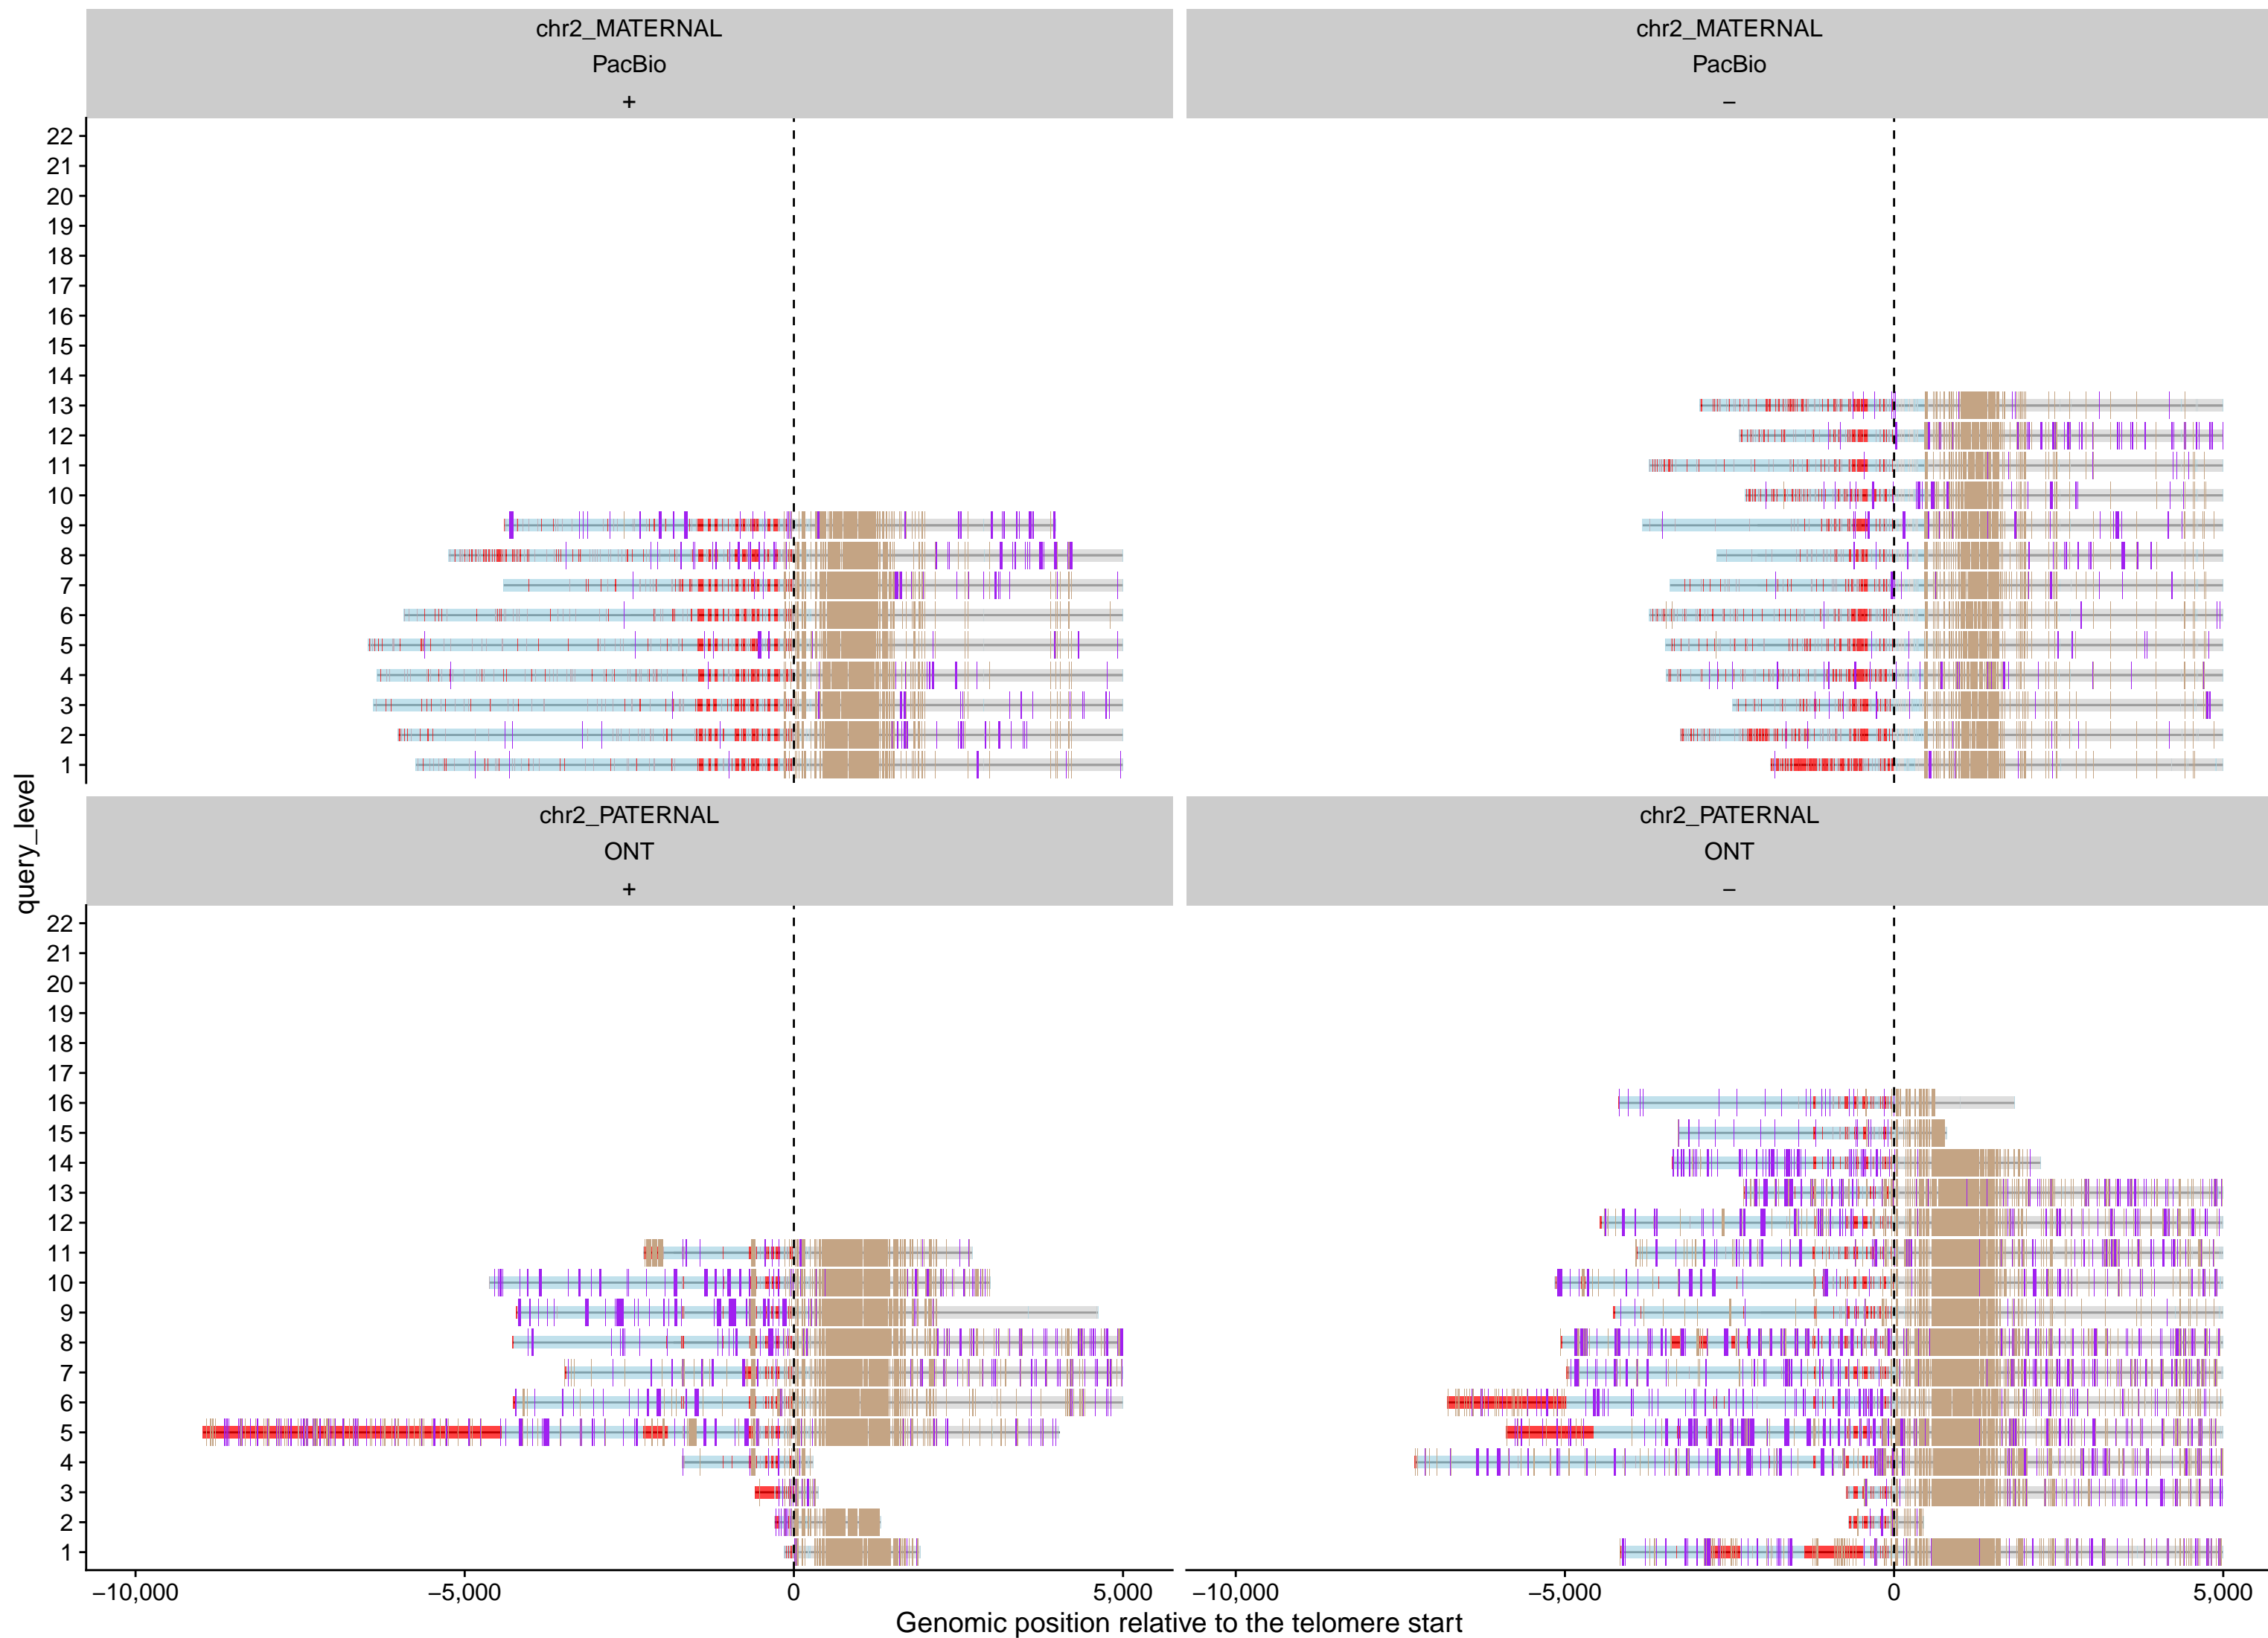

Supplement: Supplemental_Code.zip [file telo.pdf › Fiber-m6A-figures-and-tables-0.0.1/Figures/telo.pdf]
