# Supplementary material for: DNA-m6A calling and integrated long-read epigenetic and genetic analysis with fibertools
Source: HighWire-hosted journal article supplement (doi:10.1101/gr.279095.124), 2024-06-07

- Subread model (2.2)
- Semi-supervised CNN (2.2)
- ipdSummary (2.2)
- Semi-supervised CNN (Revio)

Autocorrelation between m6A events

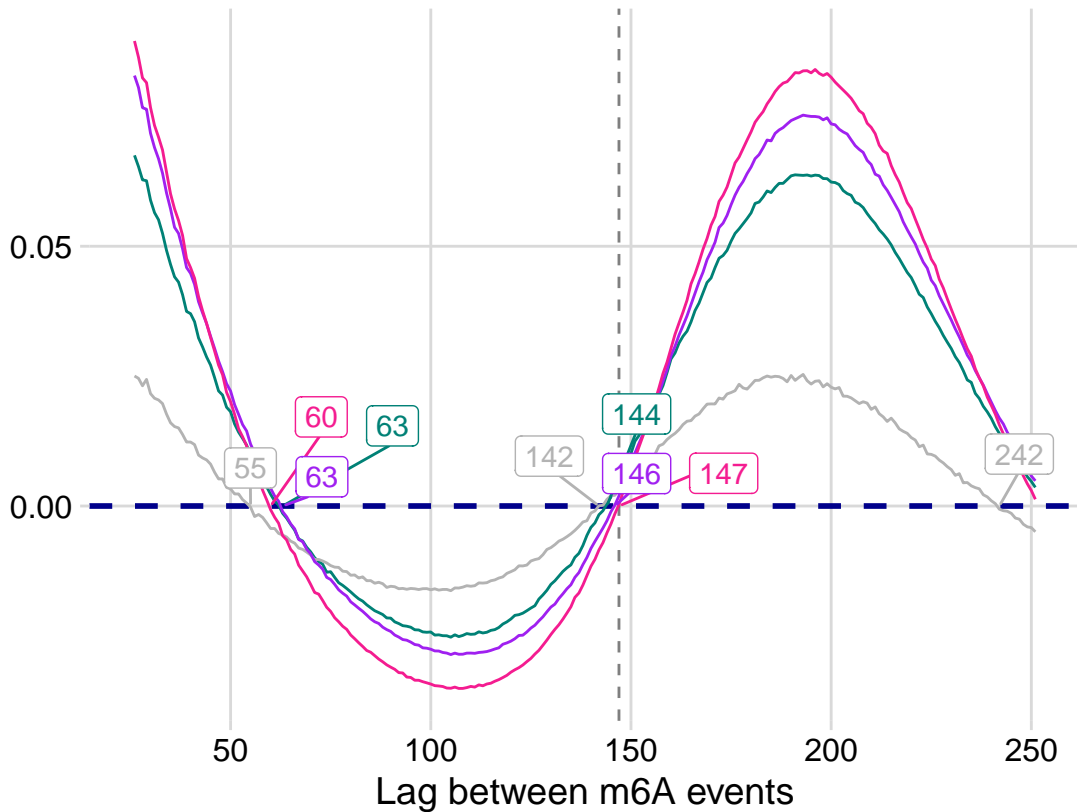

Supplement: Supplemental_Code.zip [file GM12878-autocorrelation-between-m6A-simple-revio_2023-10-11.pdf › Fiber-m6A-figures-and-tables-0.0.1/Figures/GM12878-autocorrelation-between-m6A-simple-revio_2023-10-11.pdf]
