# Supplementary material for: DNA-m6A calling and integrated long-read epigenetic and genetic analysis with fibertools
Source: HighWire-hosted journal article supplement (doi:10.1101/gr.279095.124), 2024-06-07
Supplement: Supplemental_Code.zip [file GM12878-autocorrelation-between-m6A.pdf › Fiber-m6A-figures-and-tables-0.0.1/Figures/GM12878-autocorrelation-between-m6A.pdf]

— Revio — SEMI — GMM

Autocorrelation between m6A events

0.05

0.00

100

200

Lag between m6A events

60

63

63

144

146

147

252

255

255
