# Supplementary material for: DNA-m6A calling and integrated long-read epigenetic and genetic analysis with fibertools
Source: HighWire-hosted journal article supplement (doi:10.1101/gr.279095.124), 2024-06-07
Supplement: Supplemental_Code.zip [file ipd_values_per_read.pdf › Fiber-m6A-figures-and-tables-0.0.1/Figures/ipd_values_per_read.pdf]

ipdSummary m6A label FALSE TRUE label FALSE TRUE (label + 0.25) 0.00 0.25 0.50 0.75 1.00

ipd\_2.0

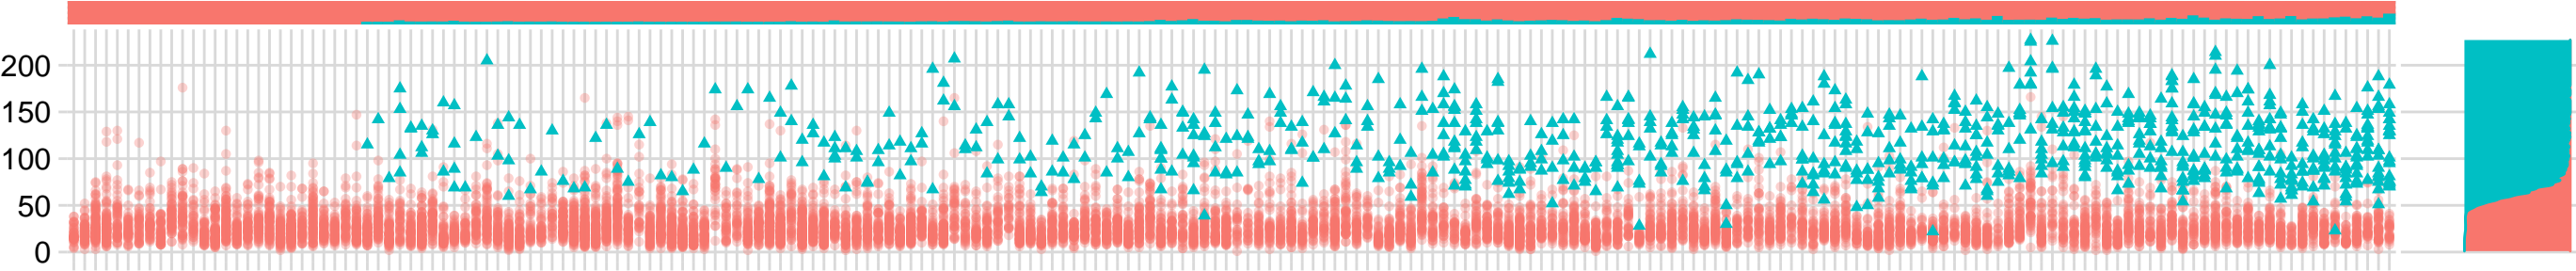

ft\_2.0

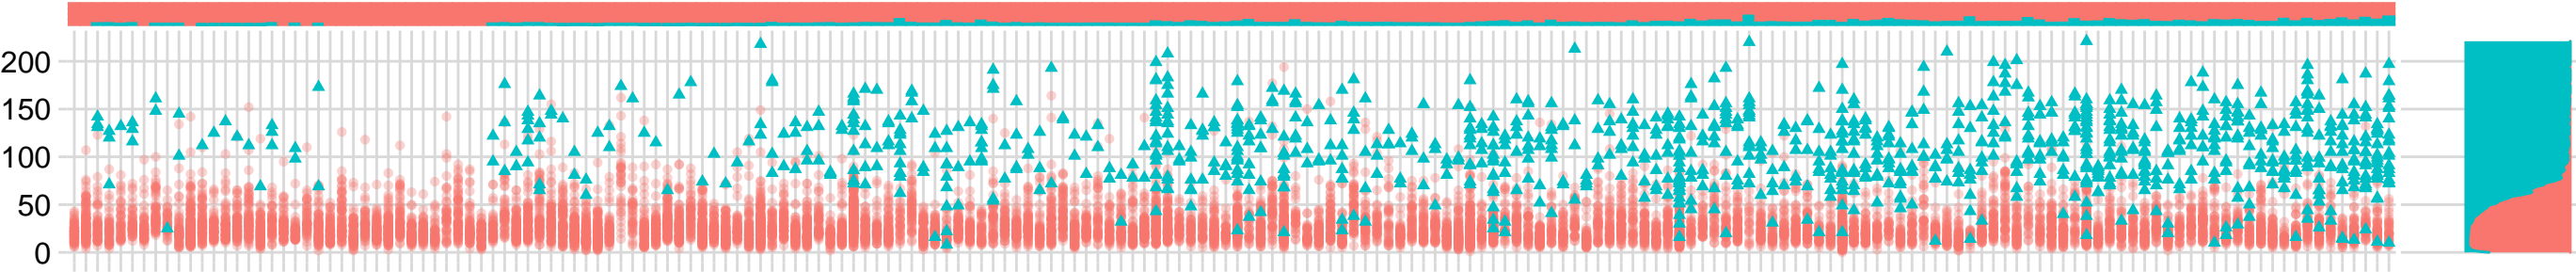

ipd\_2.2

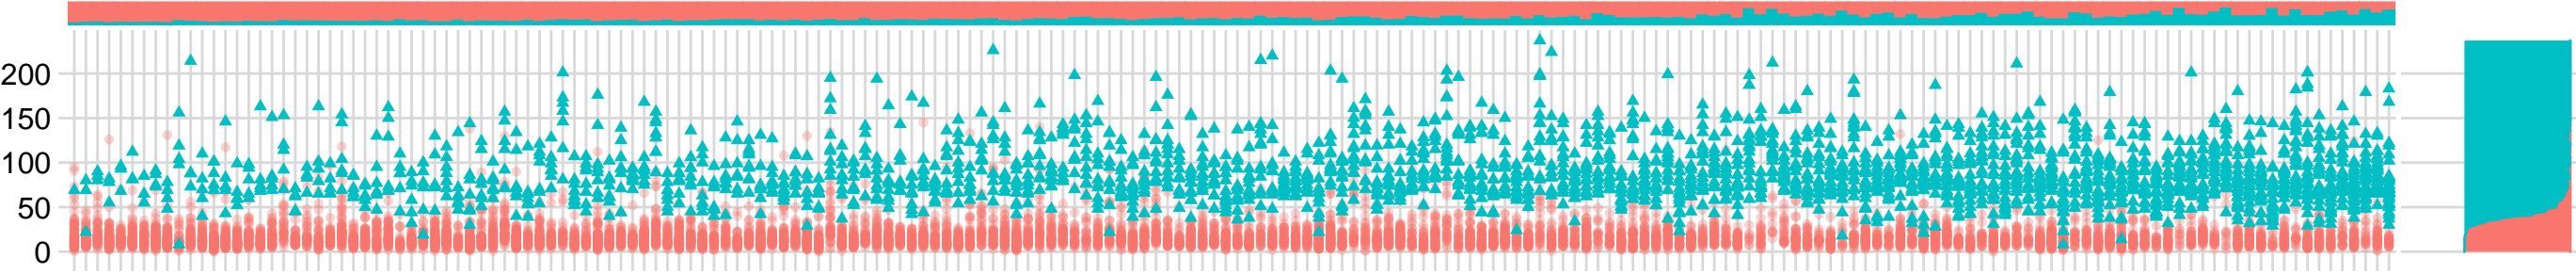

ft\_2.2

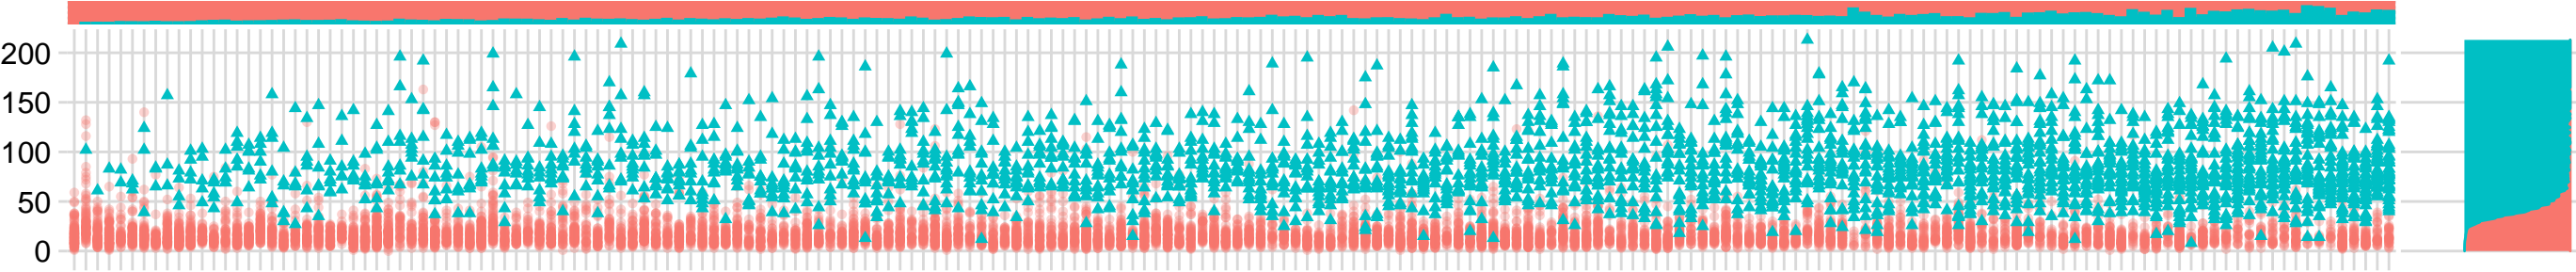

ipd\_3.2

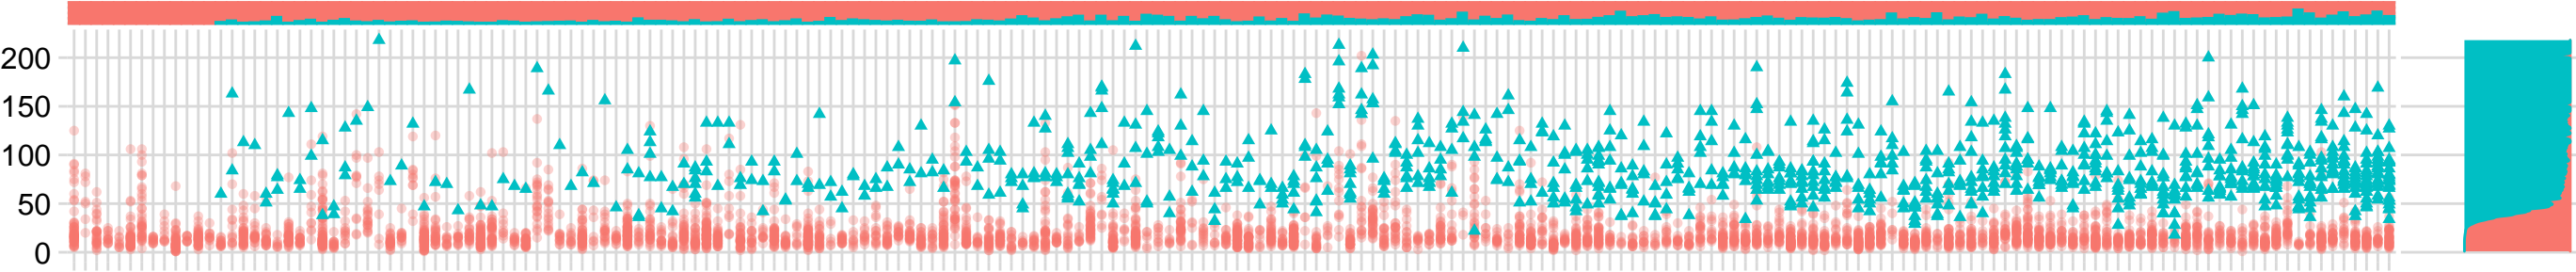

ft\_3.2

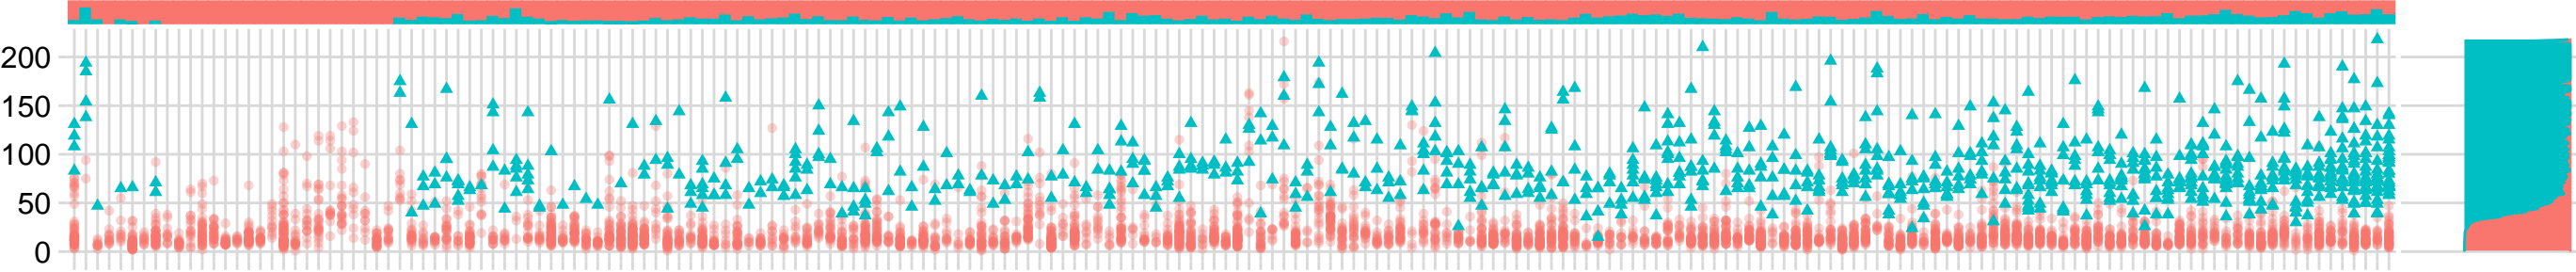

ft\_Revio

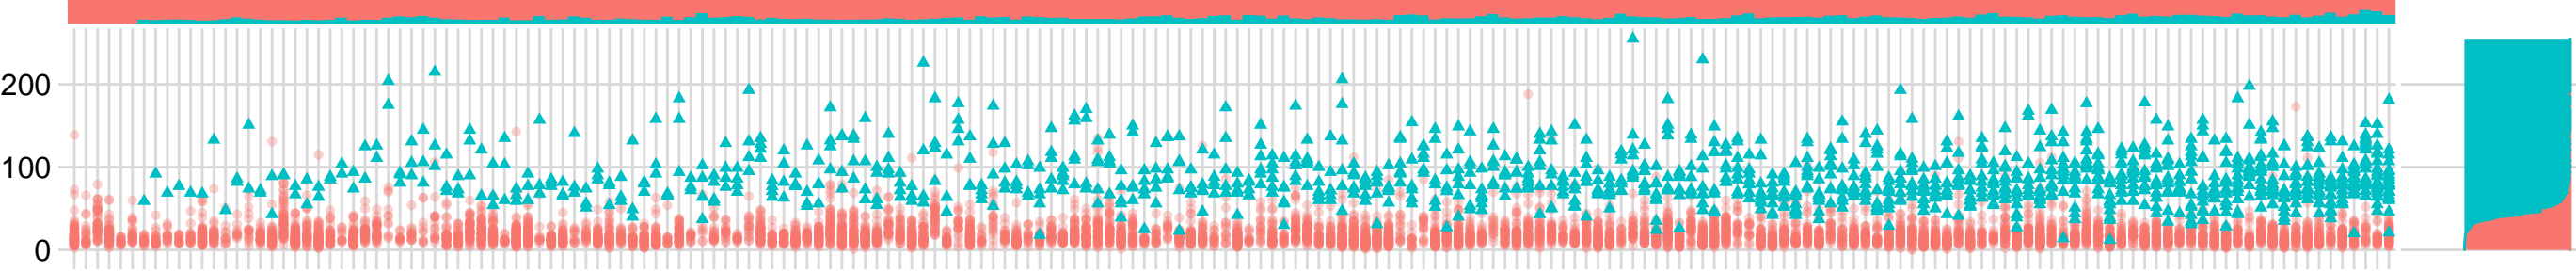

Fiber-seq reads
