# Supplementary material for: DNA-m6A calling and integrated long-read epigenetic and genetic analysis with fibertools
Source: HighWire-hosted journal article supplement (doi:10.1101/gr.279095.124), 2024-06-07
Supplement: Supplemental_Code.zip [file sup_figure_semi_supervised.pdf › train-m6A-calling-0.0.1/paper_v1/figures/sup_figure_semi_supervised.pdf]

#m6As at 95% estimated precision  
in the validation set

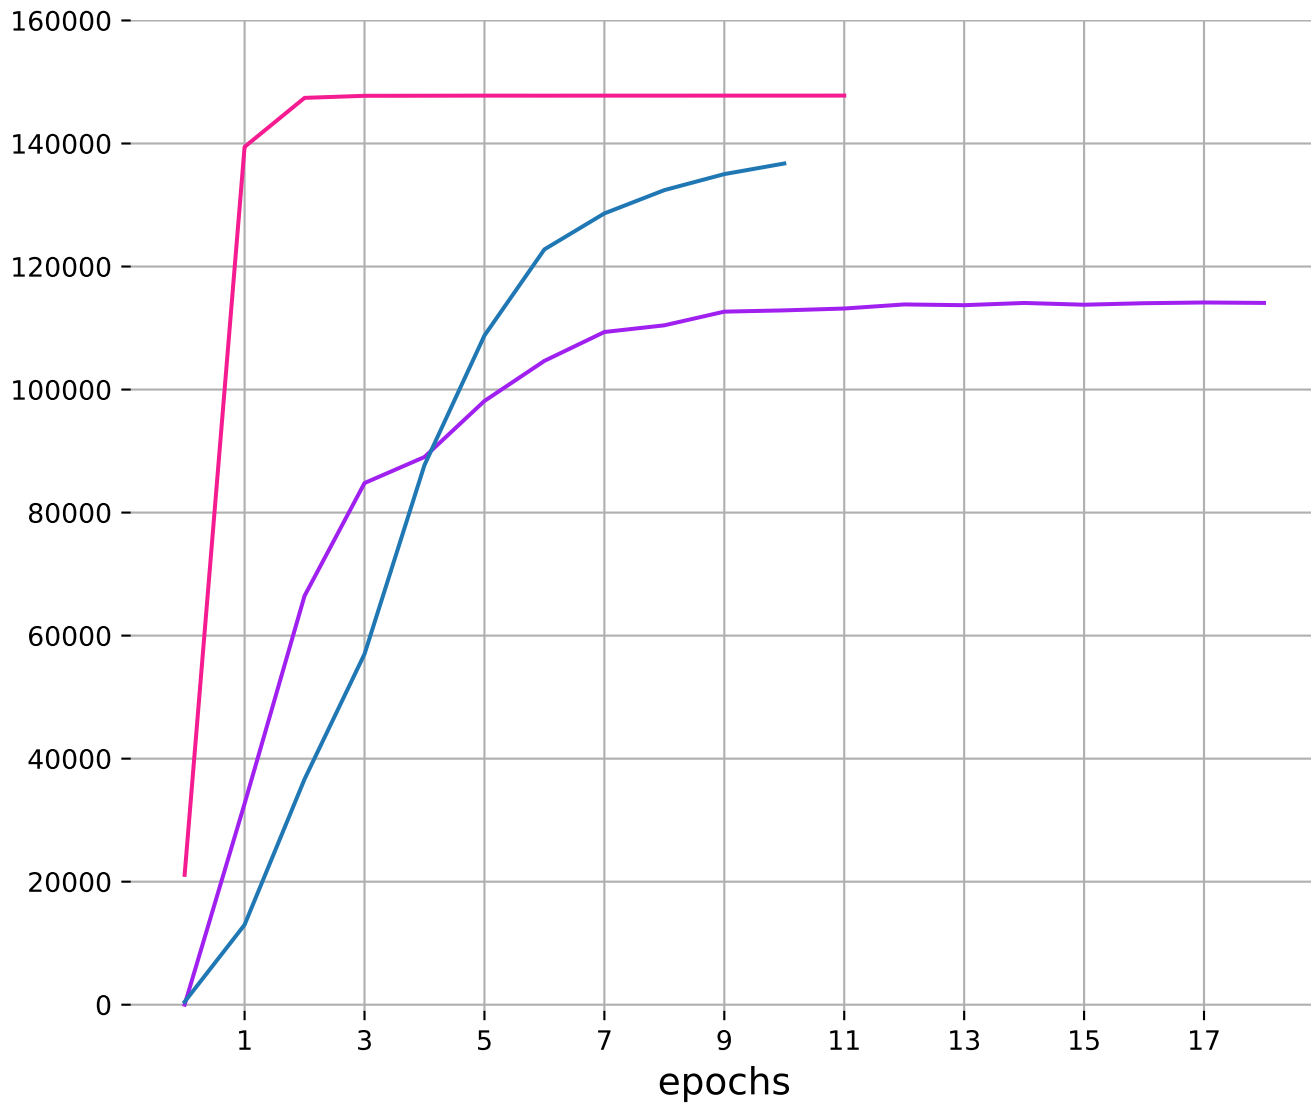

- Semi-supervised CNN (2.2)
- Semi-supervised CNN (3.2)
- Semi-supervised CNN (Revio)
