# Supplementary material for: DNA-m6A calling and integrated long-read epigenetic and genetic analysis with fibertools
Source: HighWire-hosted journal article supplement (doi:10.1101/gr.279095.124), 2024-06-07

#m6As at 95% estimated precision  
in the validation set

Revio semi-CNN with random start

200000

150000

100000

50000

0

1

2

3

4

5

6

7

8

9

10

Iterations (Iteration dataset size= $\sim$ 836K)

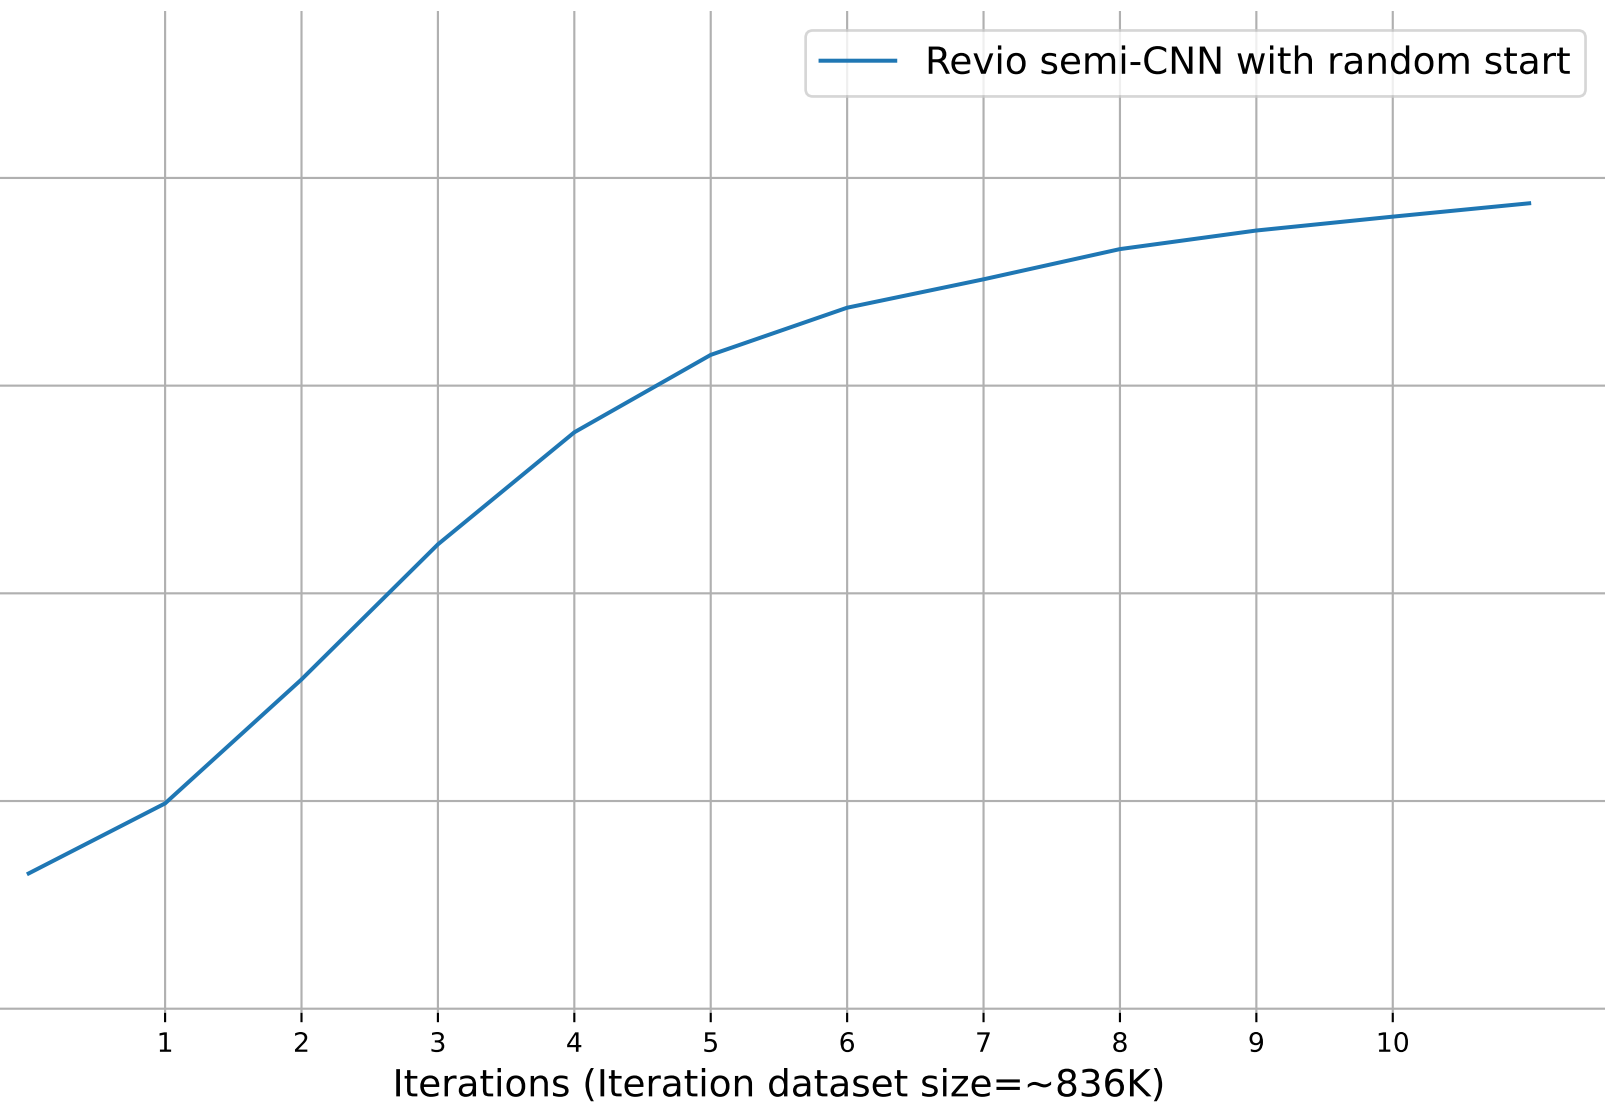

Supplement: Supplemental_Code.zip [file sup_figure_semi_supervised_revio_noinit.pdf › train-m6A-calling-0.0.1/paper_v1/figures/sup_figure_semi_supervised_revio_noinit.pdf]
