# Supplementary figures and images for: DNA-m6A calling and integrated long-read epigenetic and genetic analysis with fibertools
Source: HighWire-hosted journal article supplement (doi:10.1101/gr.279095.124), 2024-06-07

fibertools subread

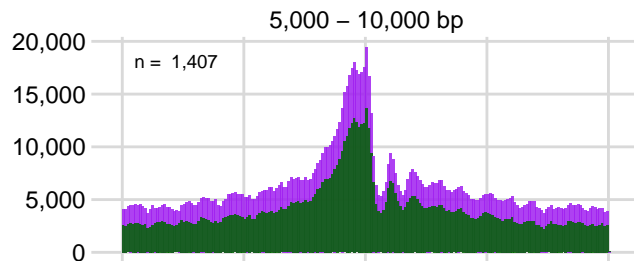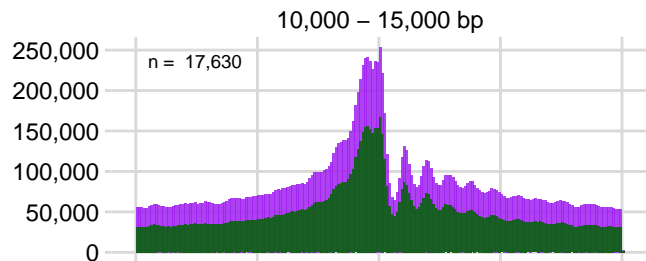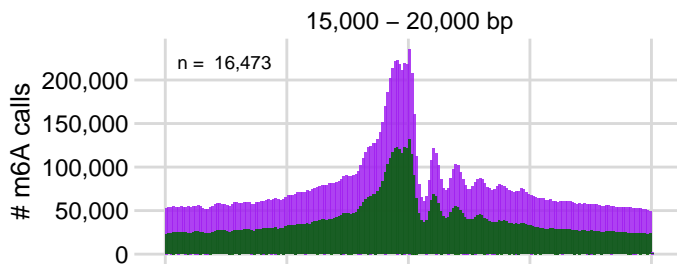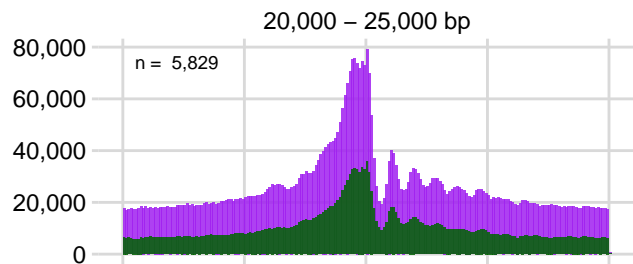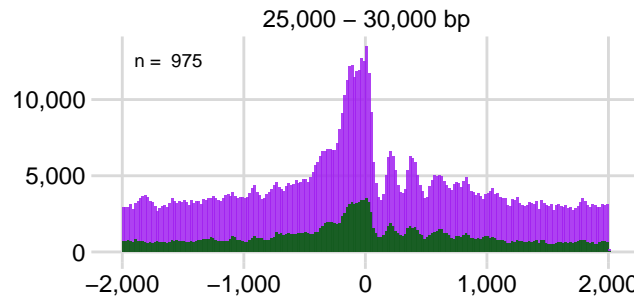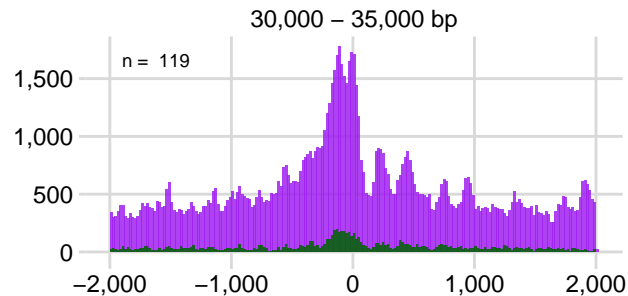

Supplement: Supplemental_Code.zip [file CAGE.pdf › Fiber-m6A-figures-and-tables-0.0.1/Figures/CAGE.pdf]

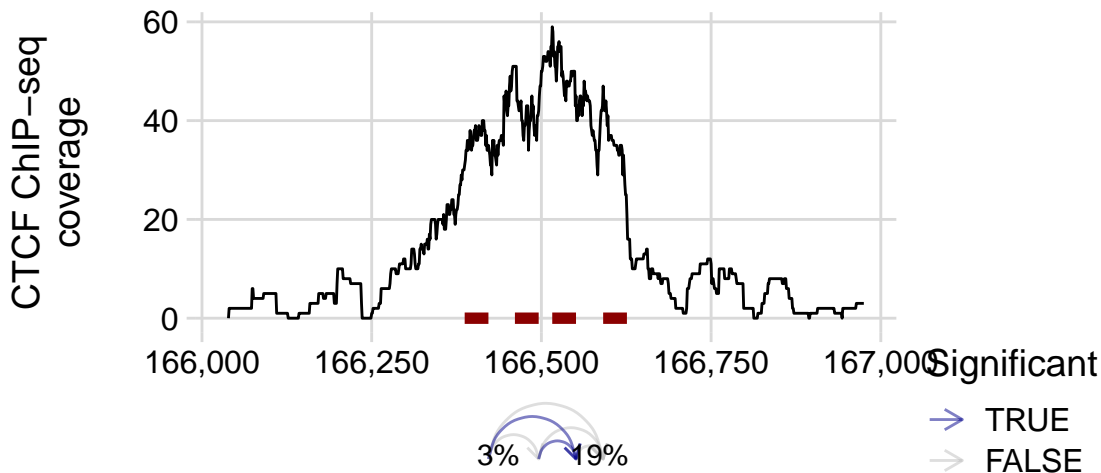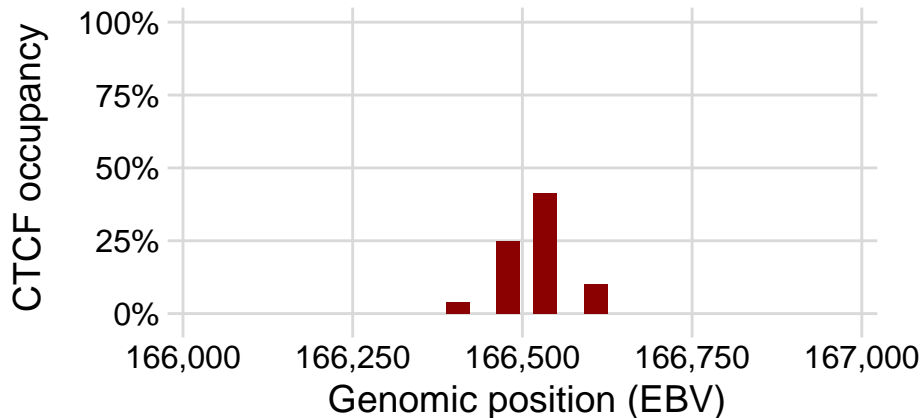

Supplement: Supplemental_Code.zip [file EBV-CTCF-depth-zoom.pdf › Fiber-m6A-figures-and-tables-0.0.1/Figures/EBV-CTCF-depth-zoom.pdf]

CTCF ChIP-seq coverage

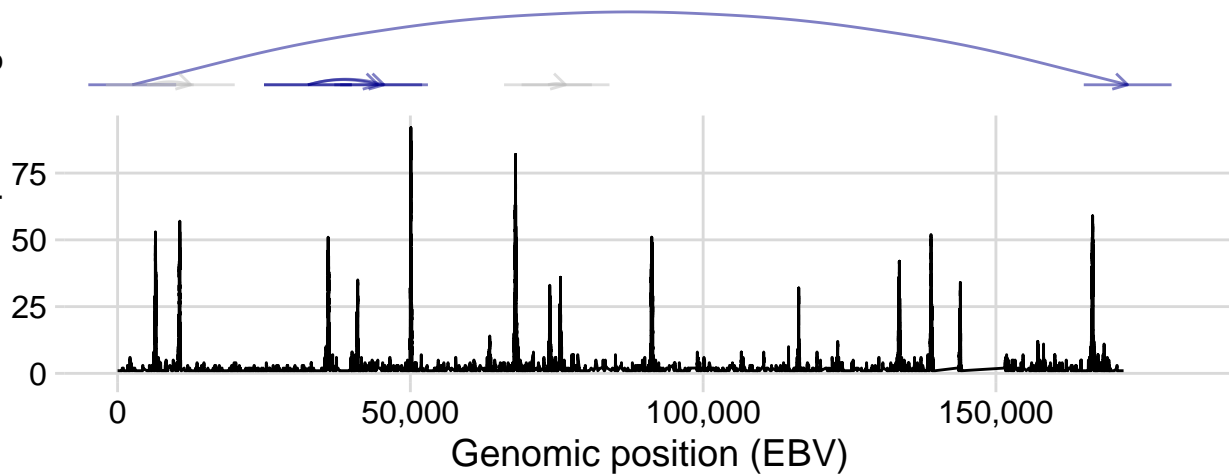

Significant

— TRUE

— FALSE

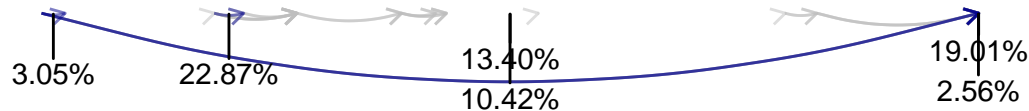

Supplement: Supplemental_Code.zip [file EBV-CTCF-depth.pdf › Fiber-m6A-figures-and-tables-0.0.1/Figures/EBV-CTCF-depth.pdf]

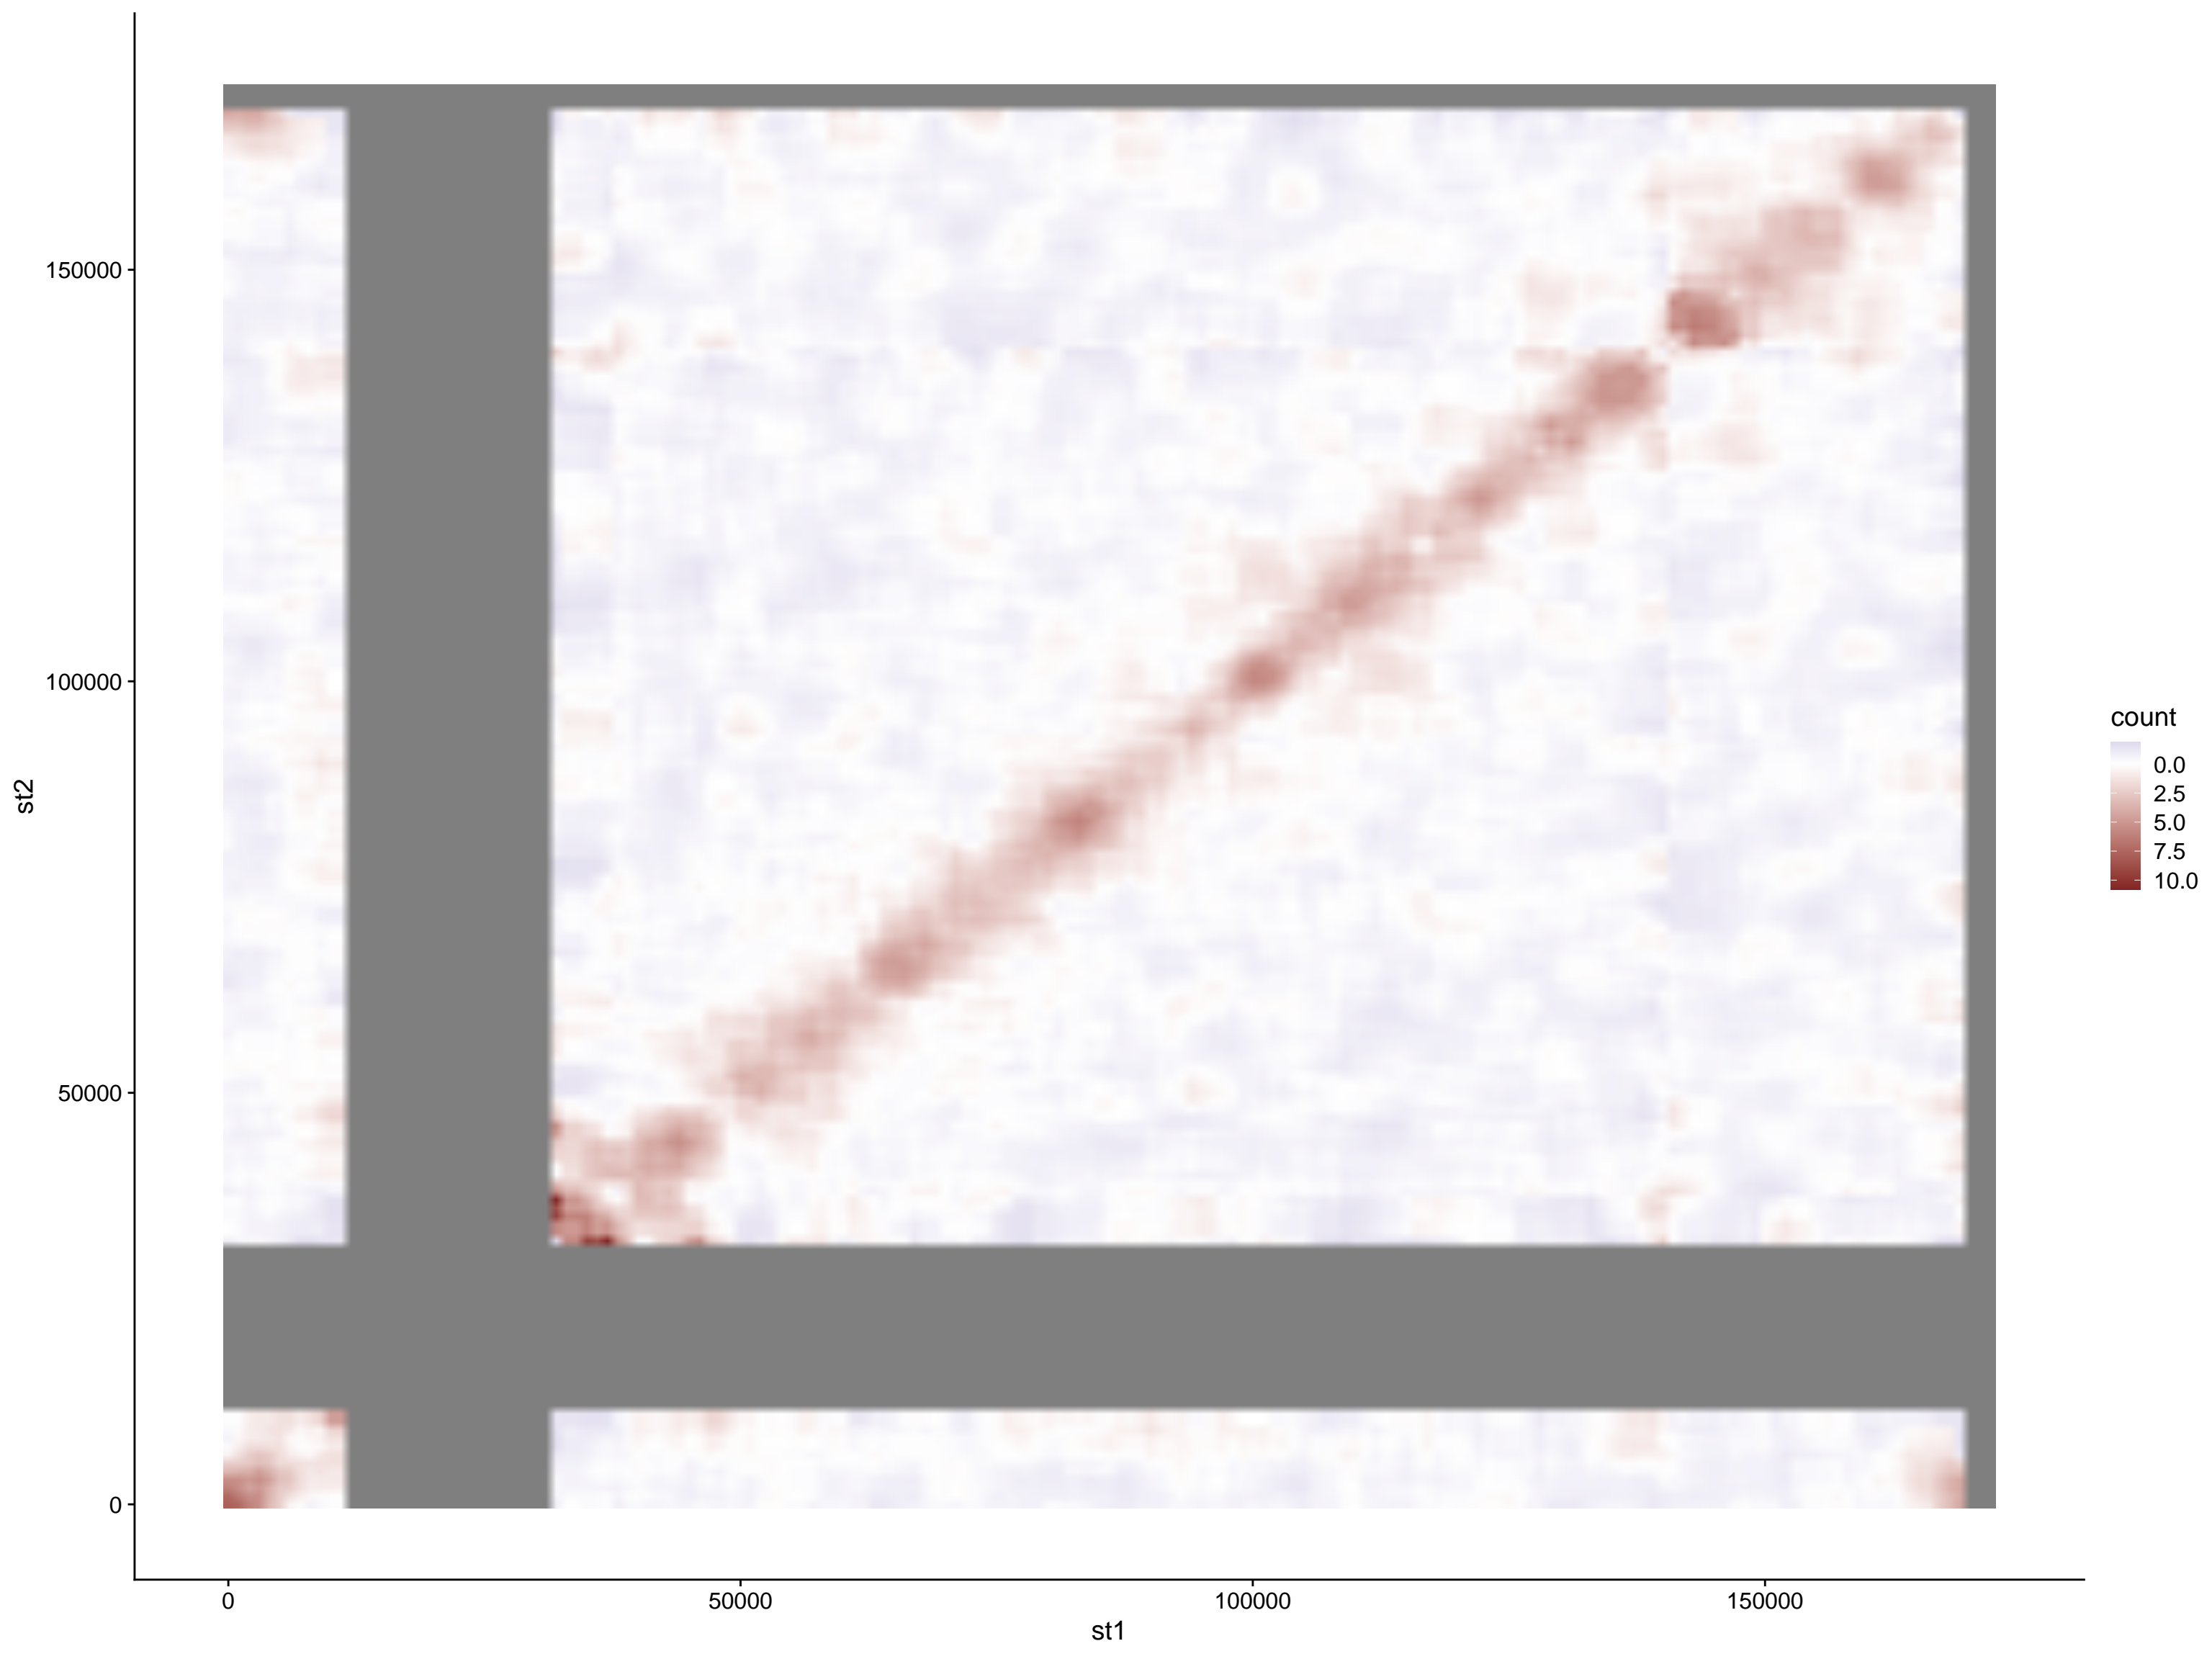

Supplement: Supplemental_Code.zip [file EBV-contacts.pdf › Fiber-m6A-figures-and-tables-0.0.1/Figures/EBV-contacts.pdf]

Subread model (2.2)    Semi-supervised CNN (2.2)  
ipdSummary (2.2)

Autocorrelation between m6A events

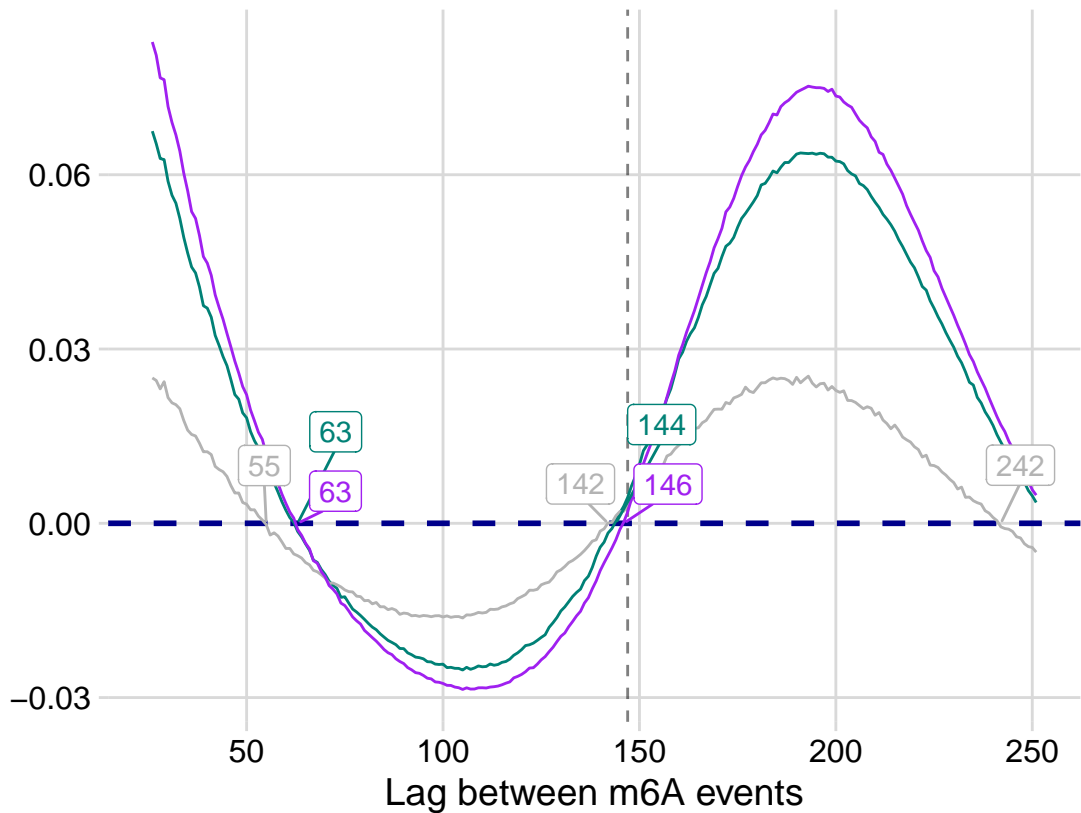

Supplement: Supplemental_Code.zip [file GM12878-autocorrelation-between-m6A-simple_2023-10-11.pdf › Fiber-m6A-figures-and-tables-0.0.1/Figures/GM12878-autocorrelation-between-m6A-simple_2023-10-11.pdf]

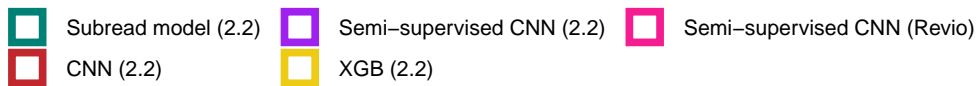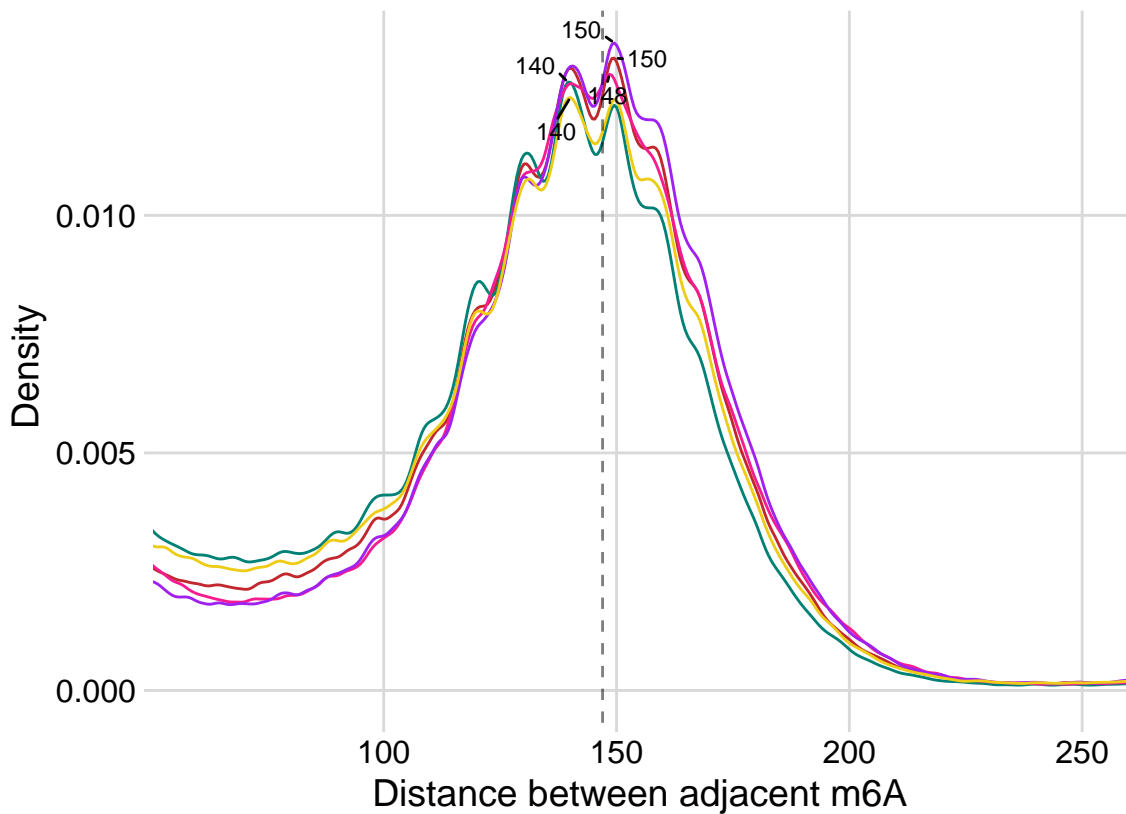

Supplement: Supplemental_Code.zip [file GM12878-distance-between-adjacent-m6A-revio.pdf › Fiber-m6A-figures-and-tables-0.0.1/Figures/GM12878-distance-between-adjacent-m6A-revio.pdf]

Subread model (2.2)   Semi-supervised CNN (2.2)   Semi-supervised CNN (Revio)

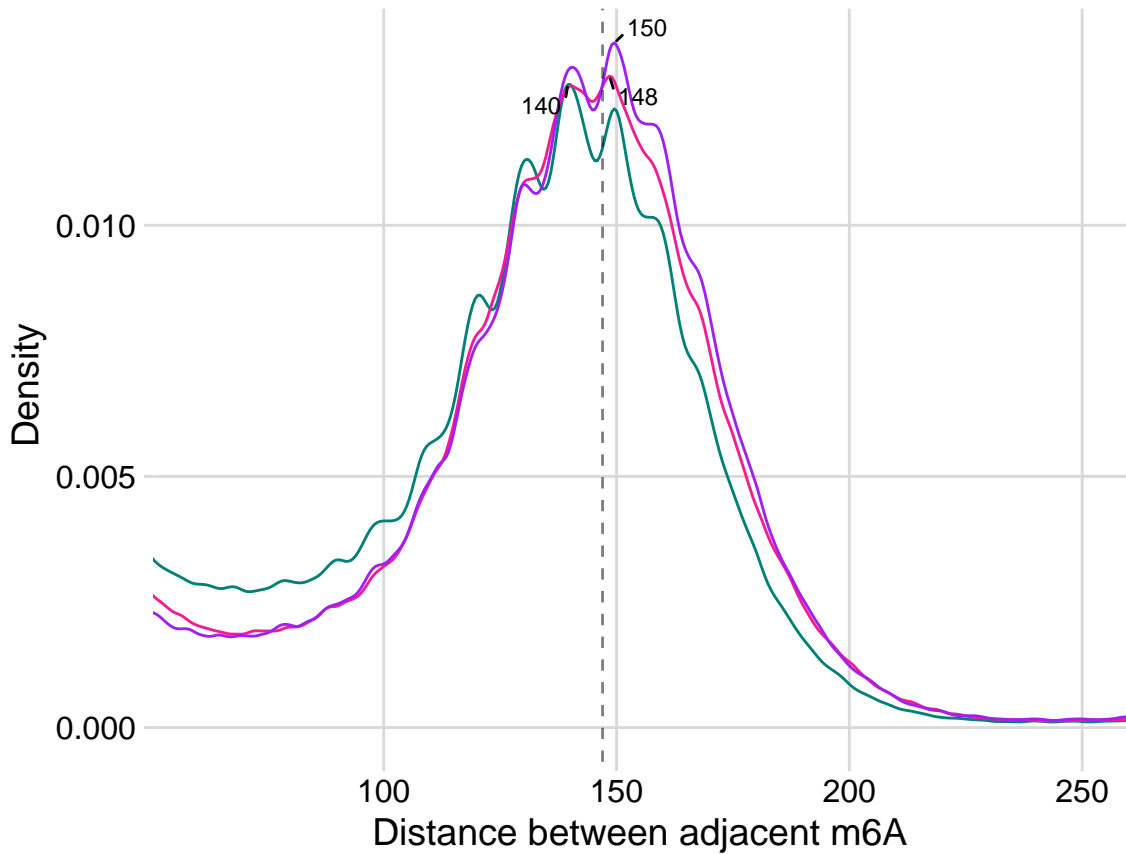

Supplement: Supplemental_Code.zip [file GM12878-distance-between-adjacent-m6A-simple-revio.pdf › Fiber-m6A-figures-and-tables-0.0.1/Figures/GM12878-distance-between-adjacent-m6A-simple-revio.pdf]

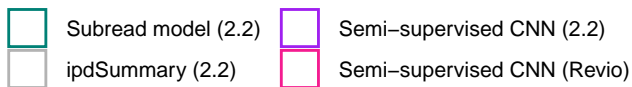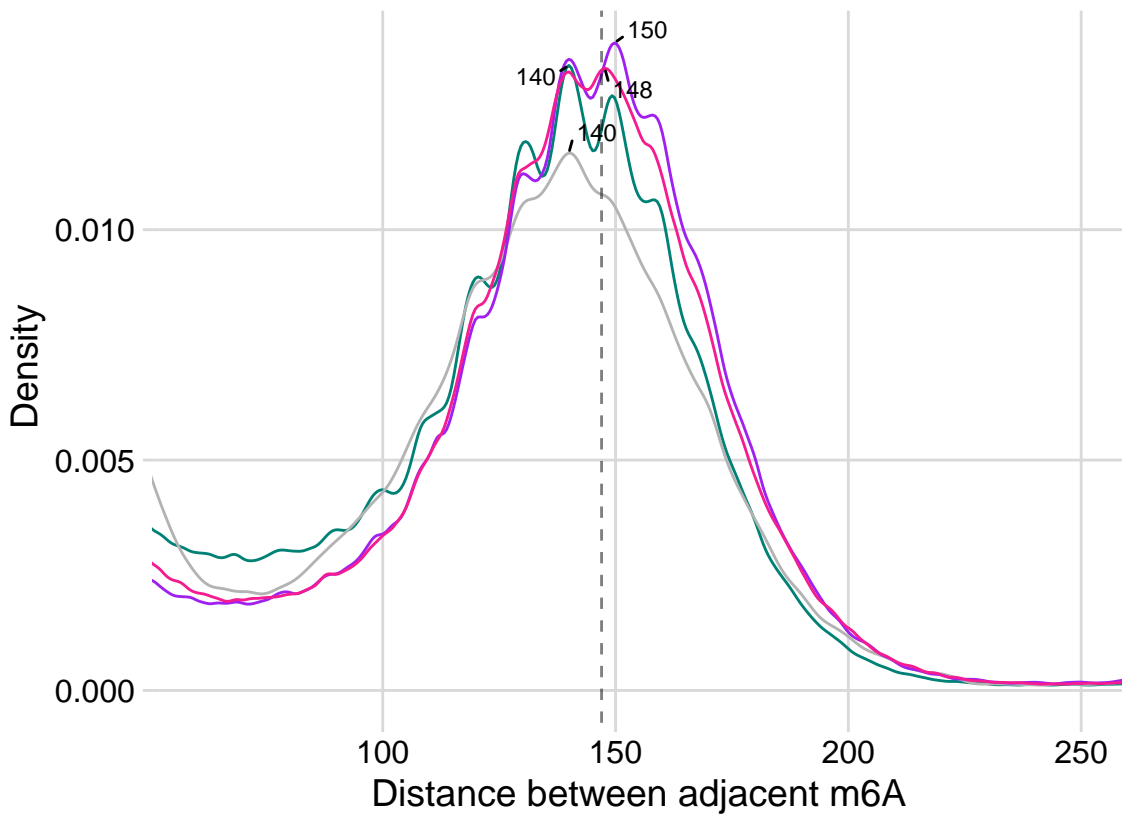

Supplement: Supplemental_Code.zip [file GM12878-distance-between-adjacent-m6A-simple-revio_2023-10-11.pdf › Fiber-m6A-figures-and-tables-0.0.1/Figures/GM12878-distance-between-adjacent-m6A-simple-revio_2023-10-11.pdf]

Subread model (2.2)   Semi-supervised CNN (2.2)   Semi-supervised CNN (Revio)

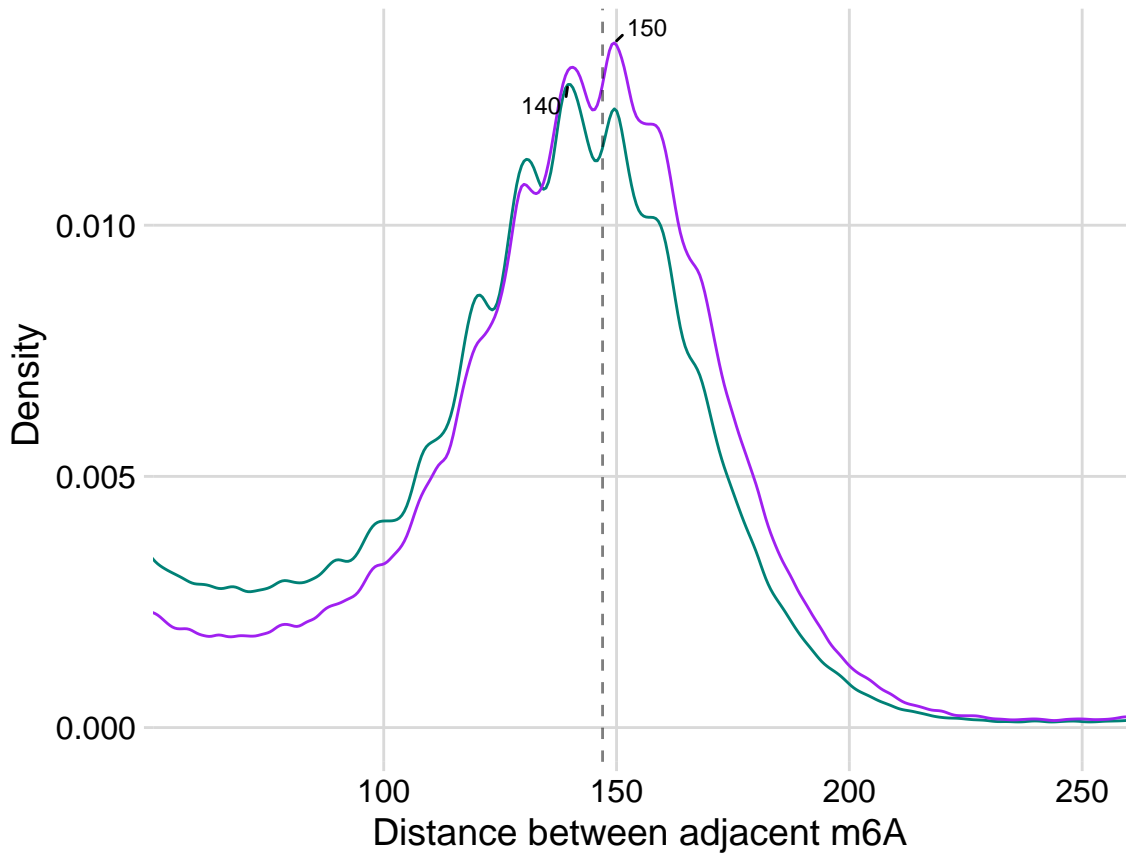

Supplement: Supplemental_Code.zip [file GM12878-distance-between-adjacent-m6A-simple.pdf › Fiber-m6A-figures-and-tables-0.0.1/Figures/GM12878-distance-between-adjacent-m6A-simple.pdf]

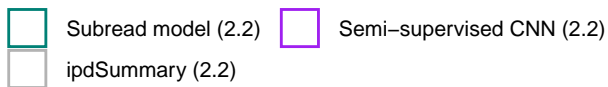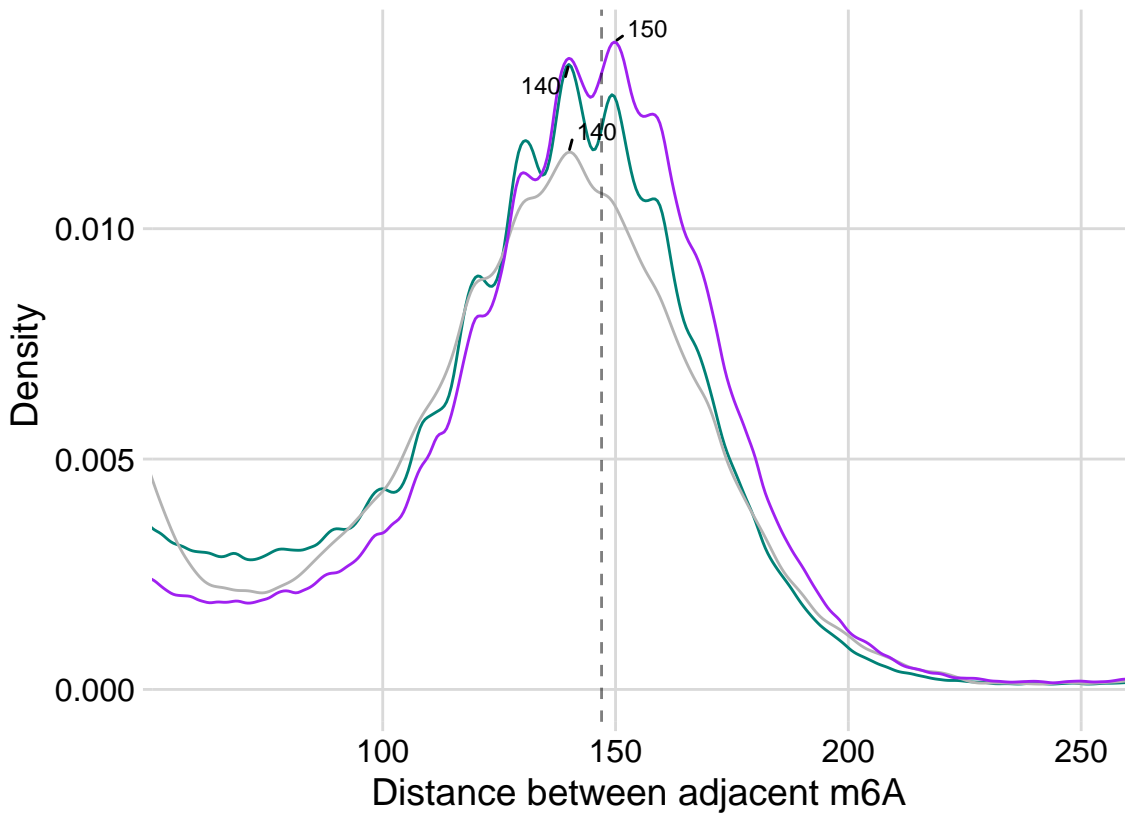

Supplement: Supplemental_Code.zip [file GM12878-distance-between-adjacent-m6A-simple_2023-10-11.pdf › Fiber-m6A-figures-and-tables-0.0.1/Figures/GM12878-distance-between-adjacent-m6A-simple_2023-10-11.pdf]

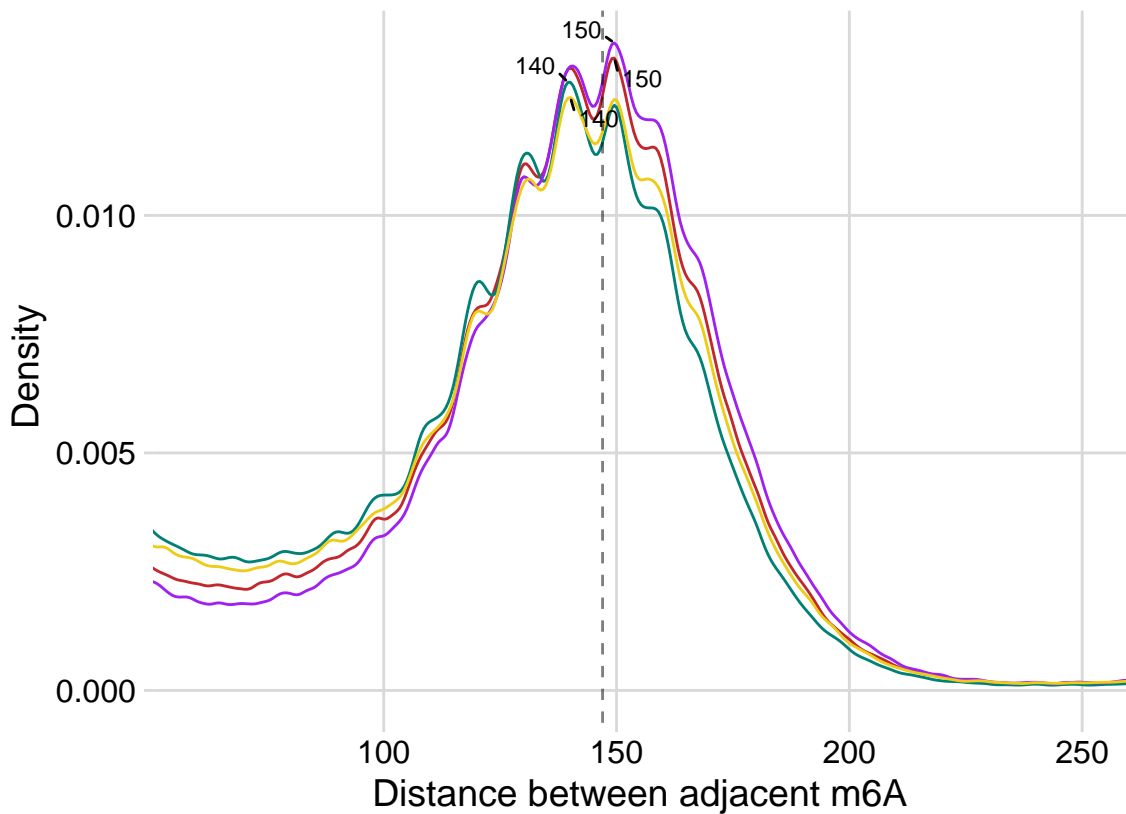

Supplement: Supplemental_Code.zip [file GM12878-distance-between-adjacent-m6A.pdf › Fiber-m6A-figures-and-tables-0.0.1/Figures/GM12878-distance-between-adjacent-m6A.pdf]

subread both fibertools

Fiber-seq reads

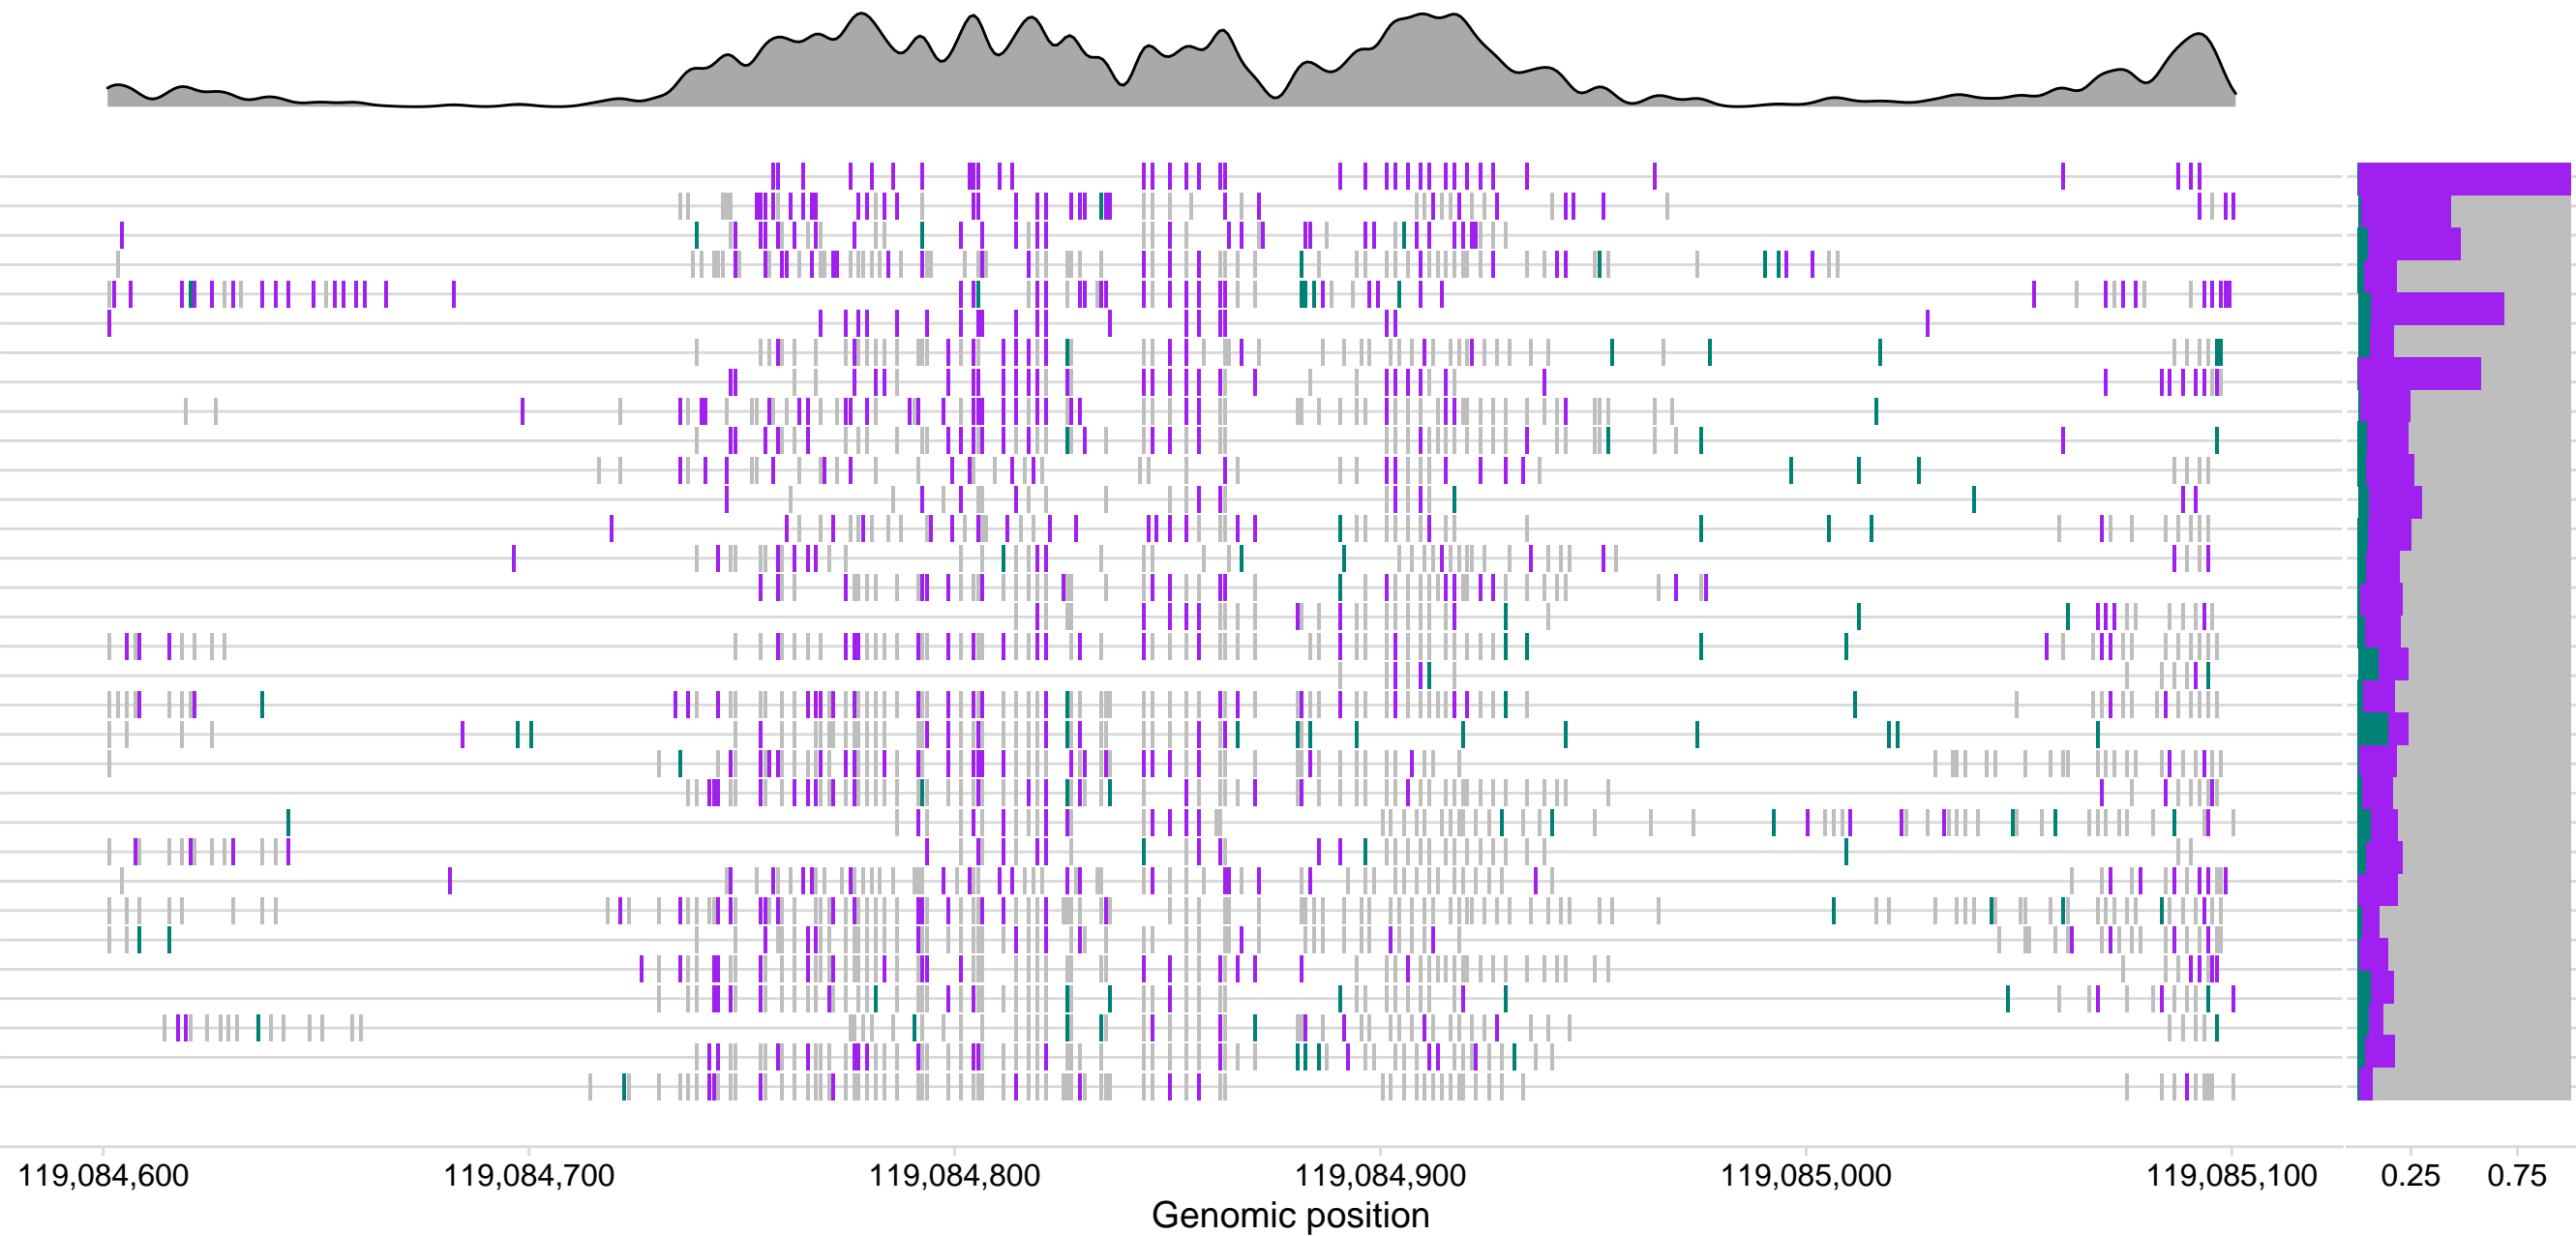

Supplement: Supplemental_Code.zip [file HMBS.pdf › Fiber-m6A-figures-and-tables-0.0.1/Figures/HMBS.pdf]

Subread pipeline Both fibertools

Fiber-seq reads

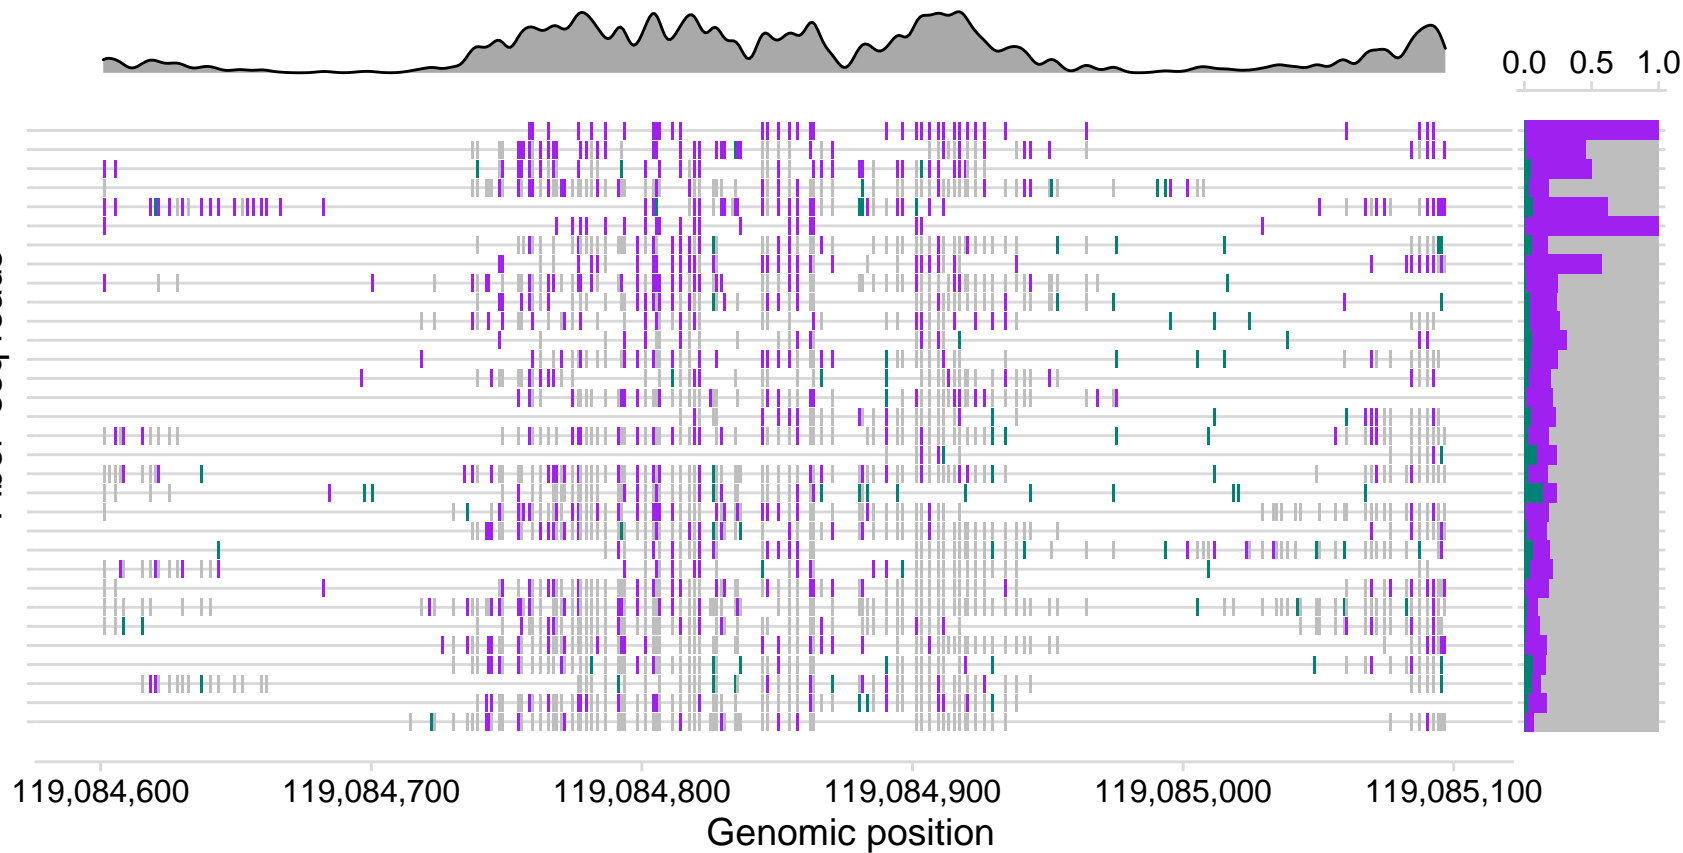

Supplement: Supplemental_Code.zip [file HMBS_reference.pdf › Fiber-m6A-figures-and-tables-0.0.1/Figures/HMBS_reference.pdf]

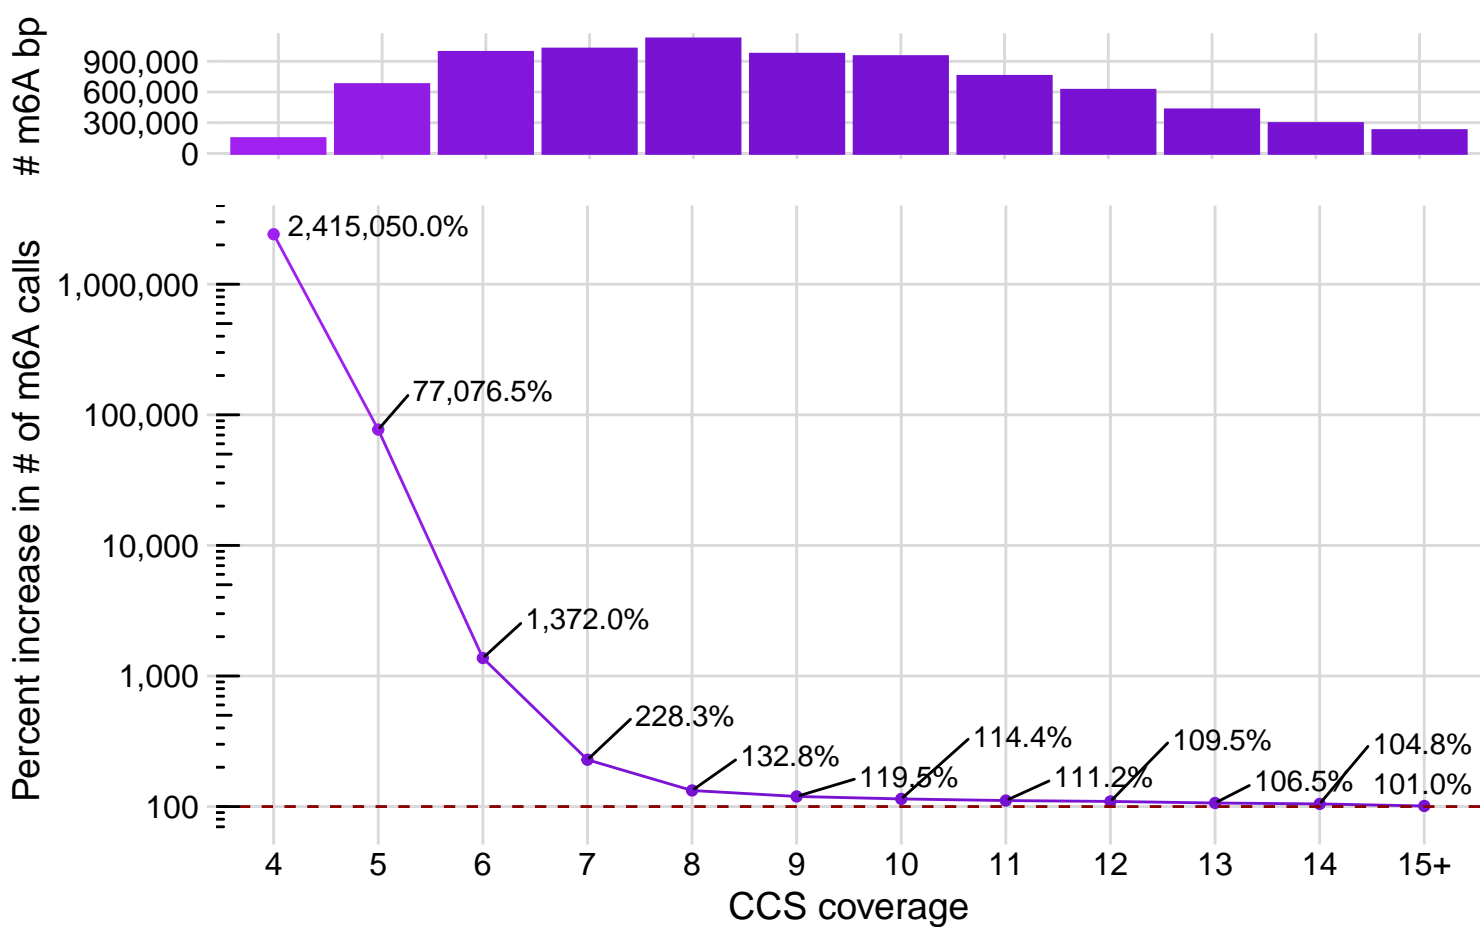

Supplement: Supplemental_Code.zip [file Increase-in-m6A-calls-by-coverage.pdf › Fiber-m6A-figures-and-tables-0.0.1/Figures/Increase-in-m6A-calls-by-coverage.pdf]

Percent increase in # of m6A calls for  
reads of a given length or greater

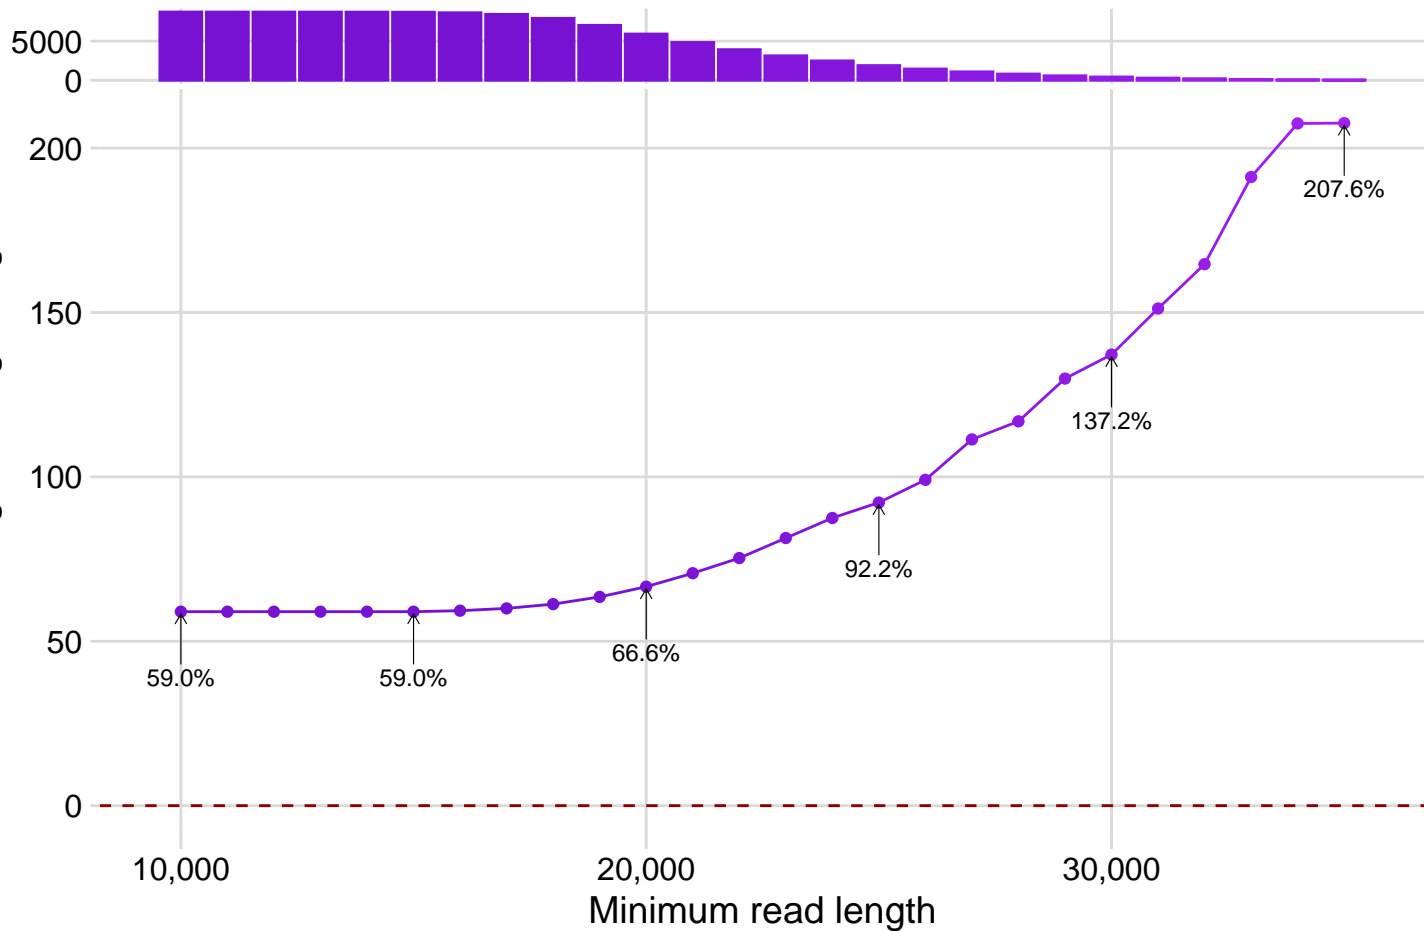

Supplement: Supplemental_Code.zip [file Increase-in-m6A-calls-by-read-length.pdf › Fiber-m6A-figures-and-tables-0.0.1/Figures/Increase-in-m6A-calls-by-read-length.pdf]

a Negative control a ONT Fiber-seq

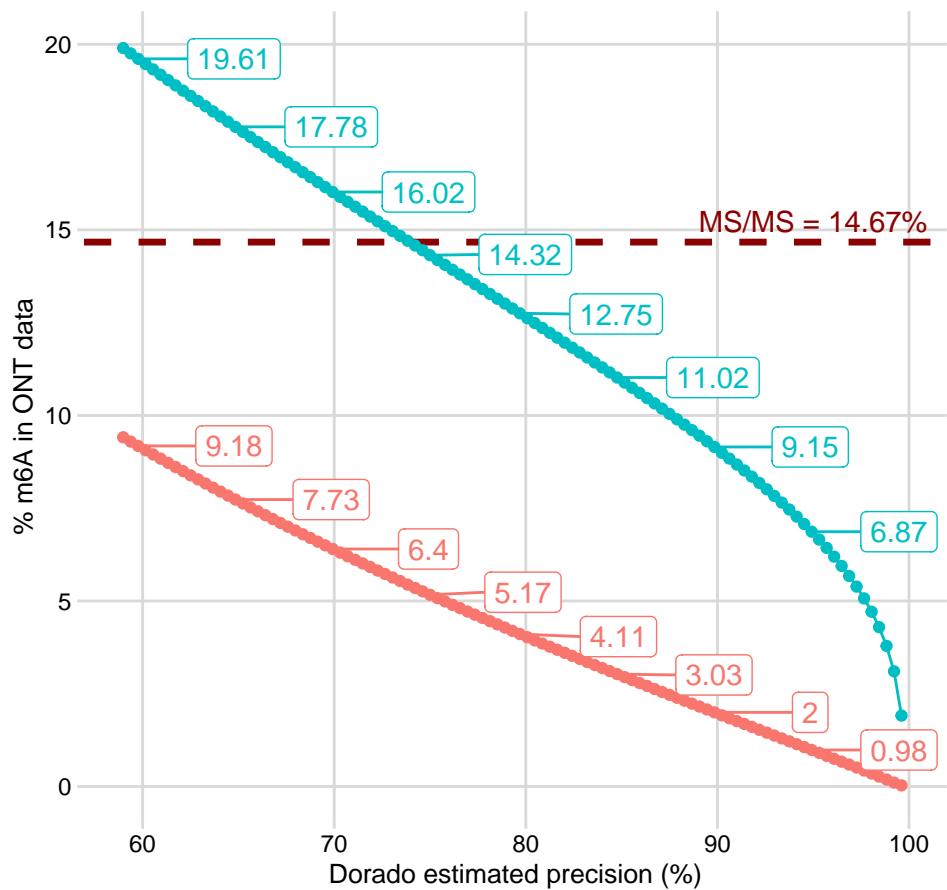

Supplement: Supplemental_Code.zip [file ONT-by-ML-tag.pdf › Fiber-m6A-figures-and-tables-0.0.1/Figures/ONT-by-ML-tag.pdf]

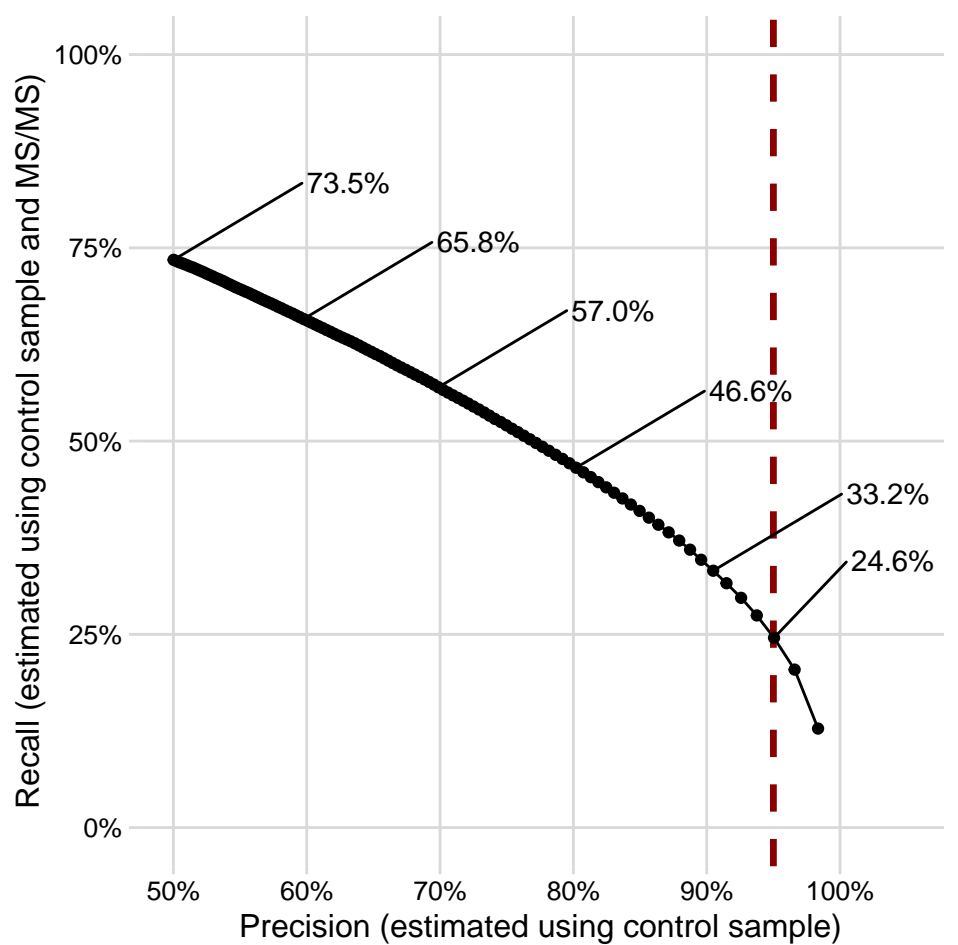

Supplement: Supplemental_Code.zip [file ONT-ratio-ML-tag.pdf › Fiber-m6A-figures-and-tables-0.0.1/Figures/ONT-ratio-ML-tag.pdf]

Subread model (2.0)    Semi-supervised CNN (2.0)

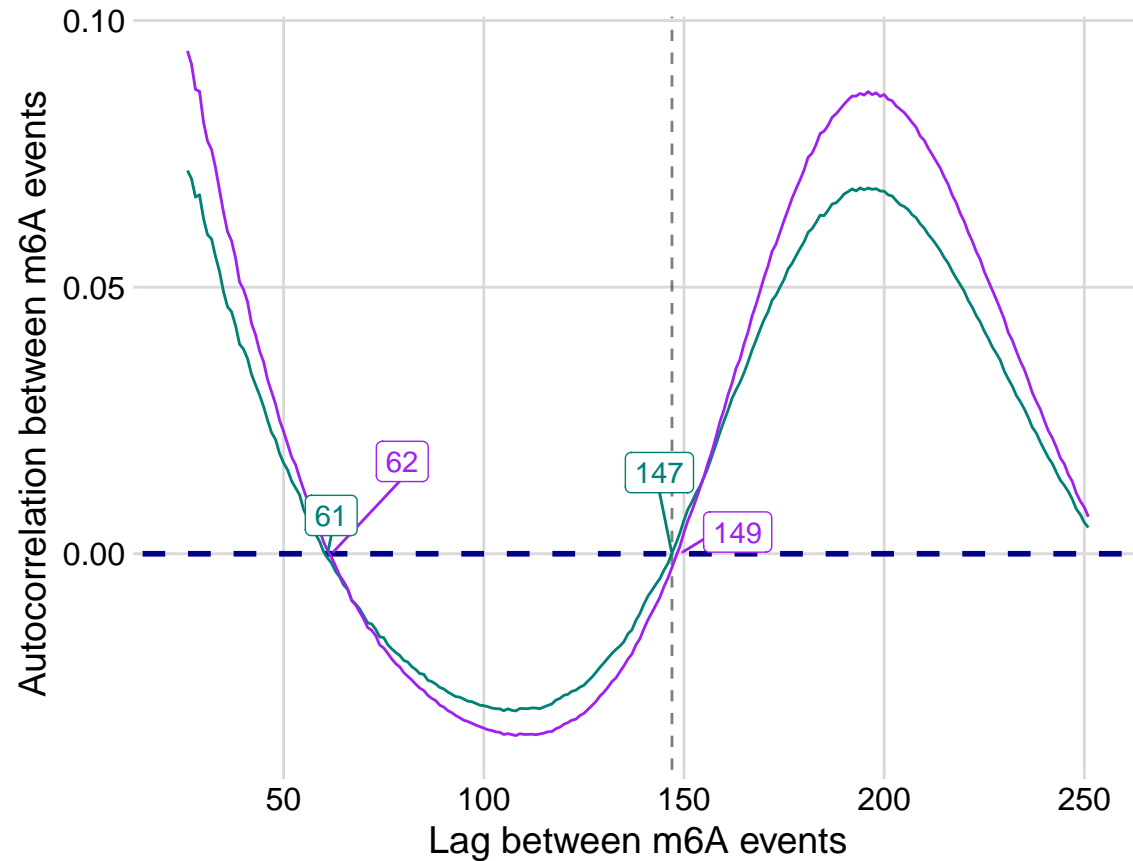

Supplement: Supplemental_Code.zip [file PS00075_1-autocorrelation-between-m6A-simple-revio.pdf › Fiber-m6A-figures-and-tables-0.0.1/Figures/PS00075_1-autocorrelation-between-m6A-simple-revio.pdf]

Subread model (2.0)    Semi-supervised CNN (2.0)

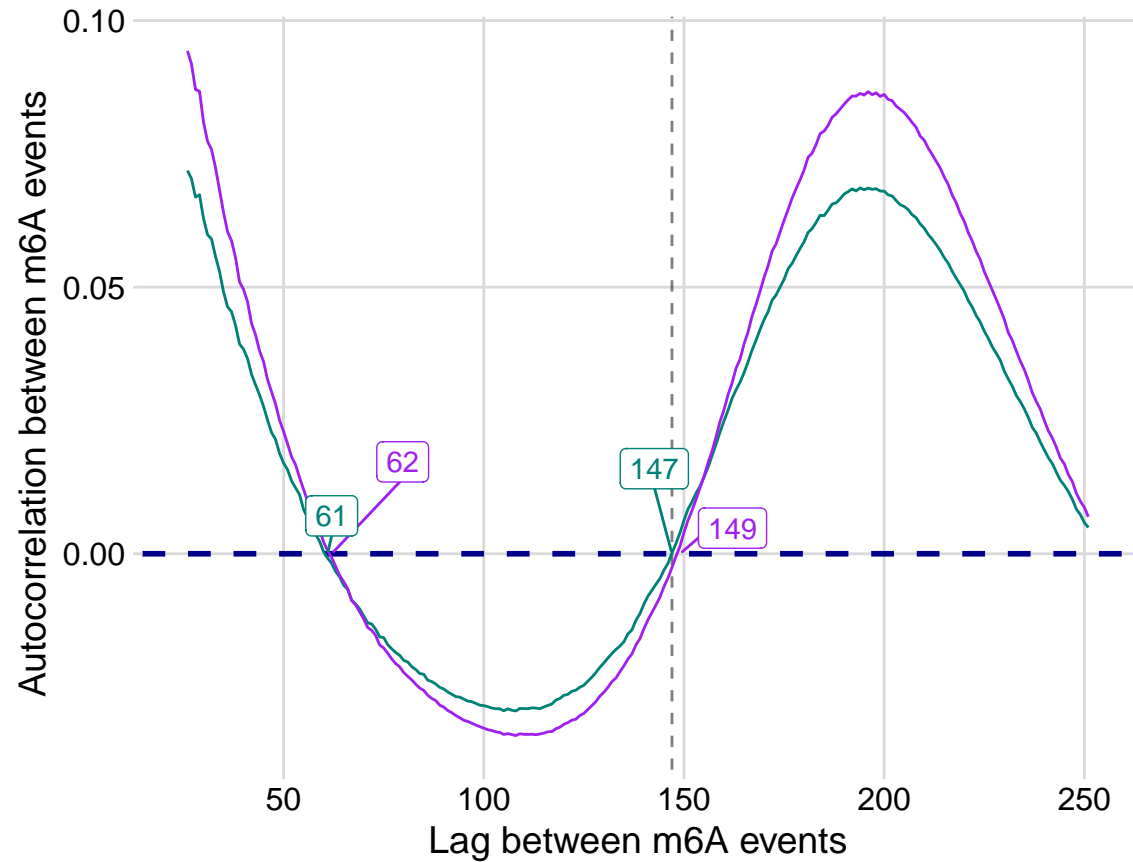

Supplement: Supplemental_Code.zip [file PS00075_1-autocorrelation-between-m6A-simple.pdf › Fiber-m6A-figures-and-tables-0.0.1/Figures/PS00075_1-autocorrelation-between-m6A-simple.pdf]

PacBio XGB IPD  
CNN GMM SEMI

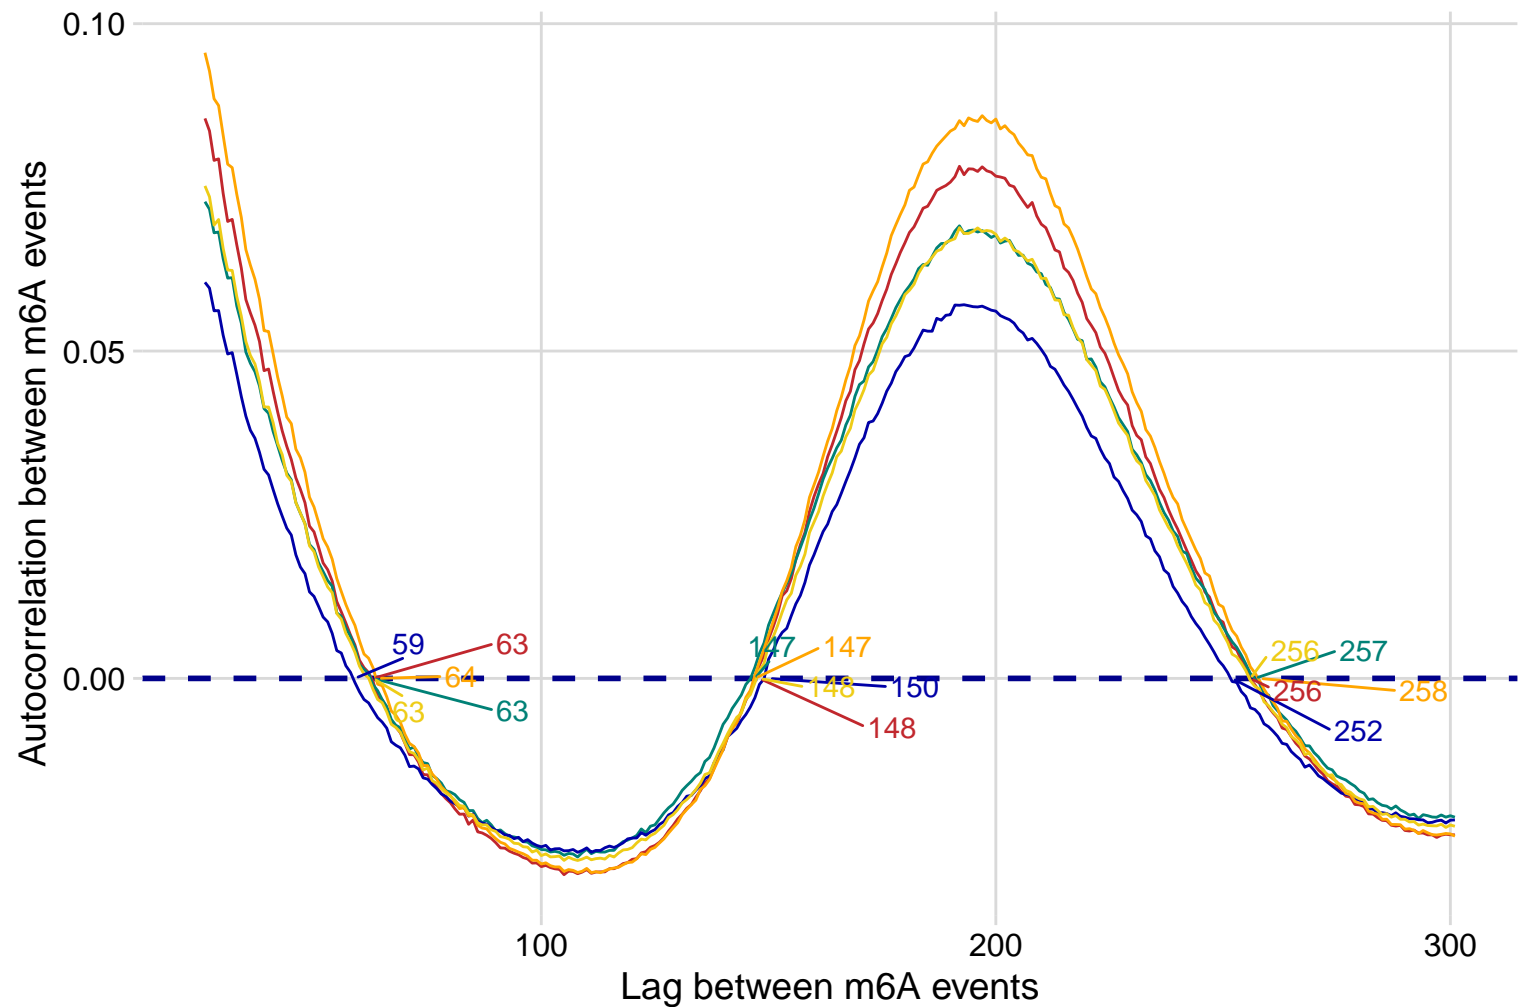

Supplement: Supplemental_Code.zip [file PS00075_1-autocorrelation-between-m6A.pdf › Fiber-m6A-figures-and-tables-0.0.1/Figures/PS00075_1-autocorrelation-between-m6A.pdf]

Subread model CNN Semi-supervised CNN XGB Revio (S

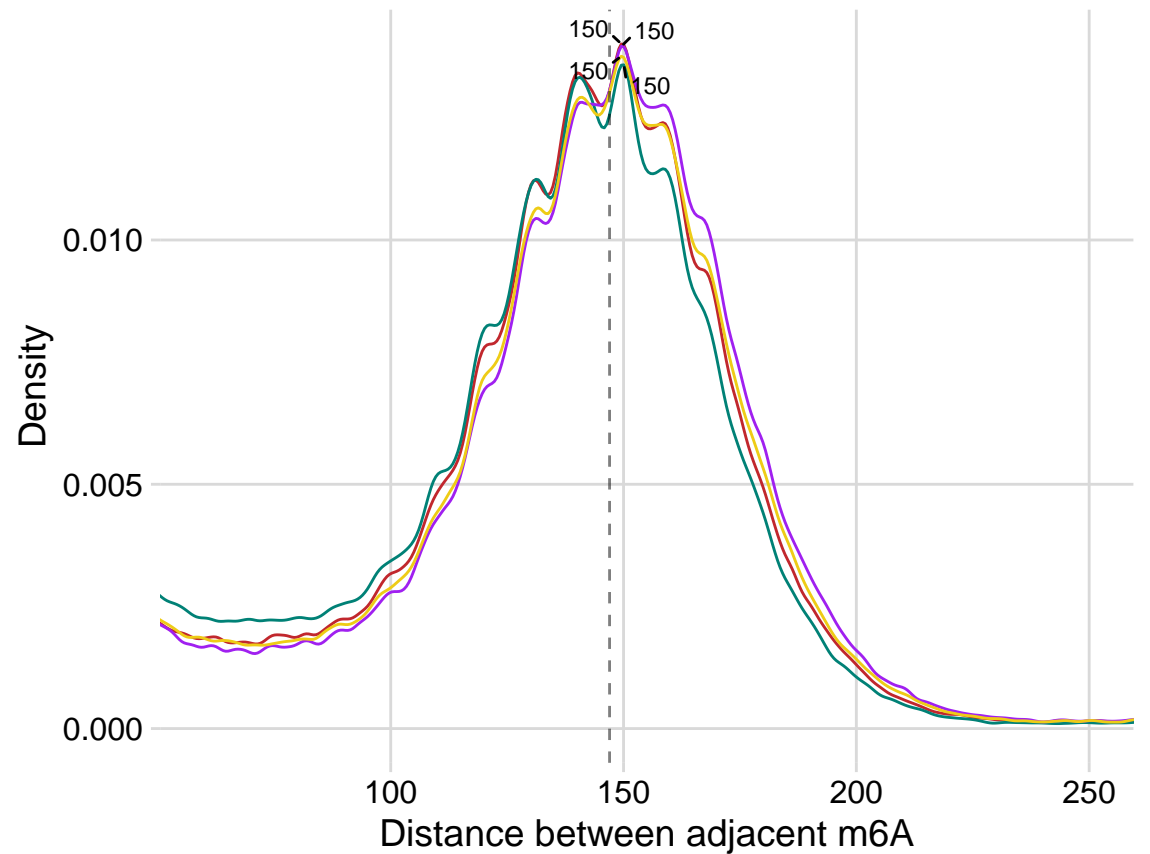

Supplement: Supplemental_Code.zip [file PS00075_1-distance-between-adjacent-m6A-revio.pdf › Fiber-m6A-figures-and-tables-0.0.1/Figures/PS00075_1-distance-between-adjacent-m6A-revio.pdf]

Subread model    Semi-supervised CNN    Revio (Semi-supervised CNN)

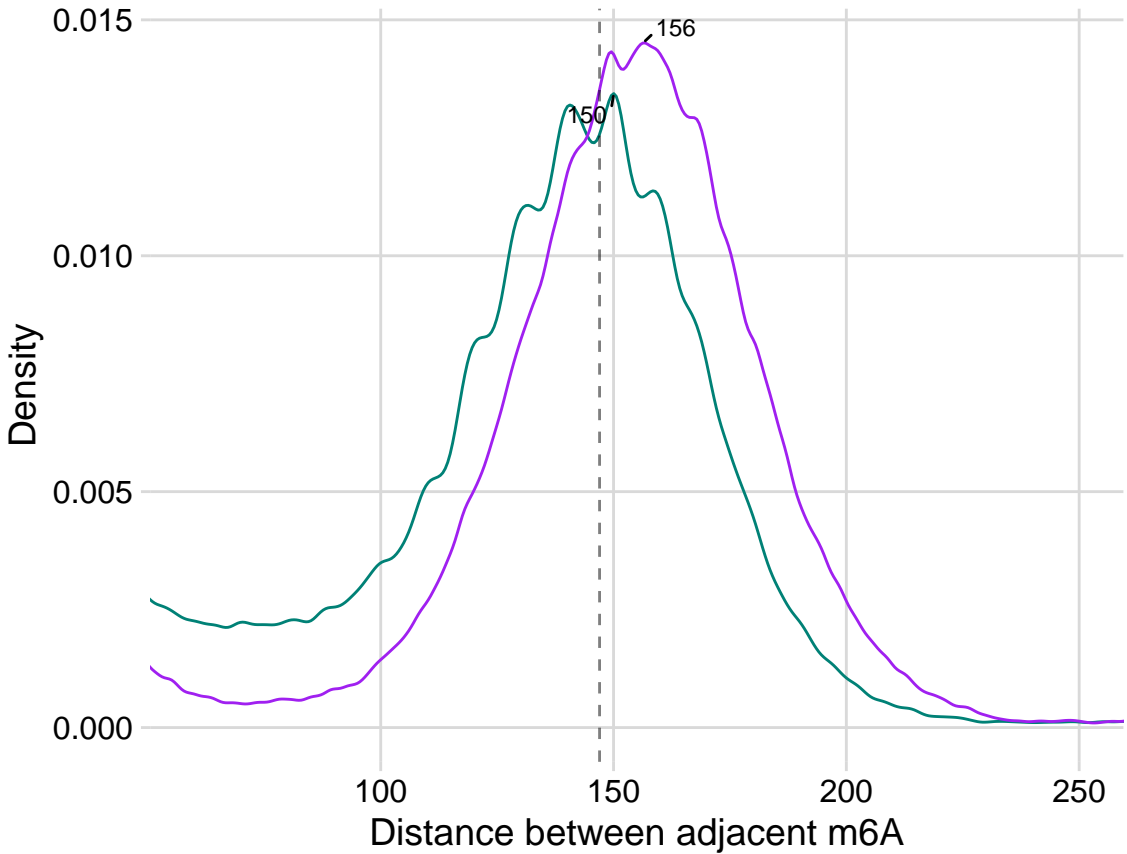

Supplement: Supplemental_Code.zip [file PS00075_1-distance-between-adjacent-m6A-simple-revio.pdf › Fiber-m6A-figures-and-tables-0.0.1/Figures/PS00075_1-distance-between-adjacent-m6A-simple-revio.pdf]

Subread model (2.0)    Semi-supervised CNN (2.0)

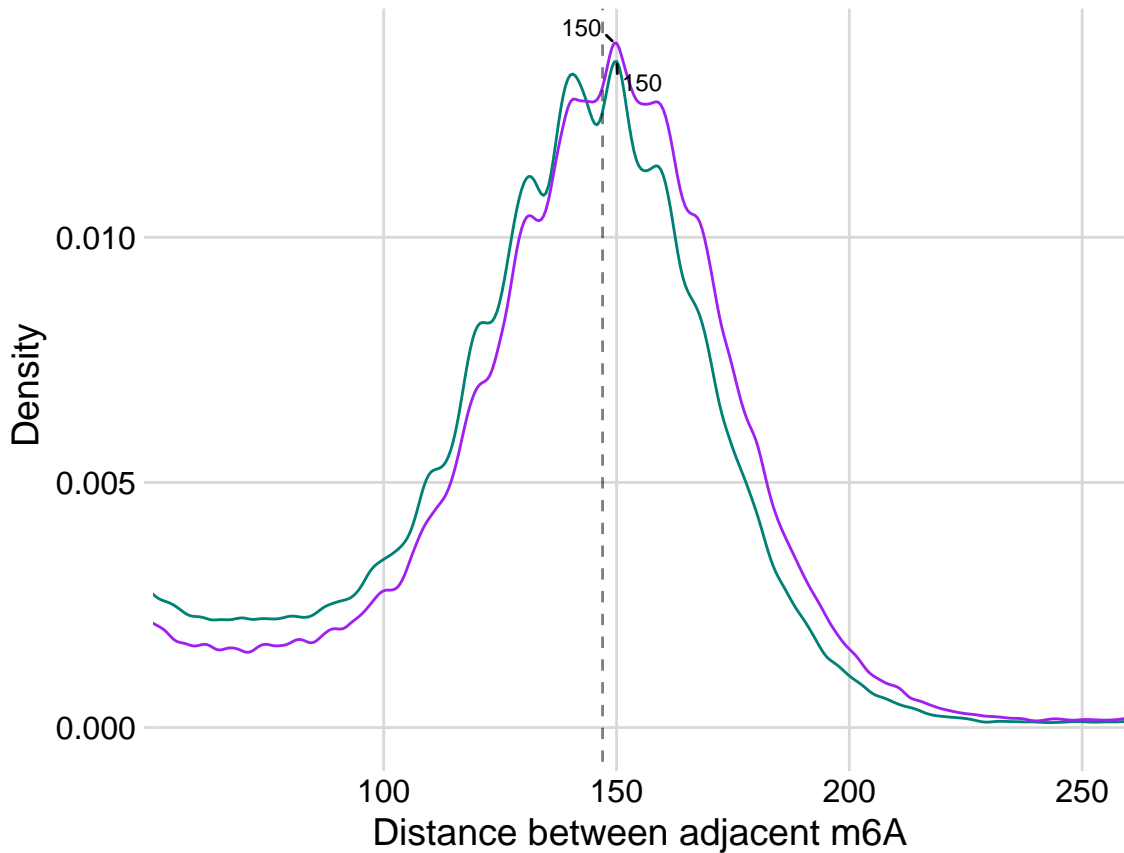

Supplement: Supplemental_Code.zip [file PS00075_1-distance-between-adjacent-m6A-simple.pdf › Fiber-m6A-figures-and-tables-0.0.1/Figures/PS00075_1-distance-between-adjacent-m6A-simple.pdf]

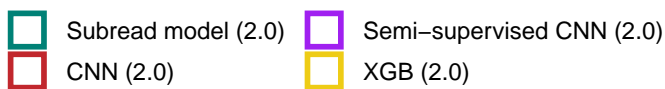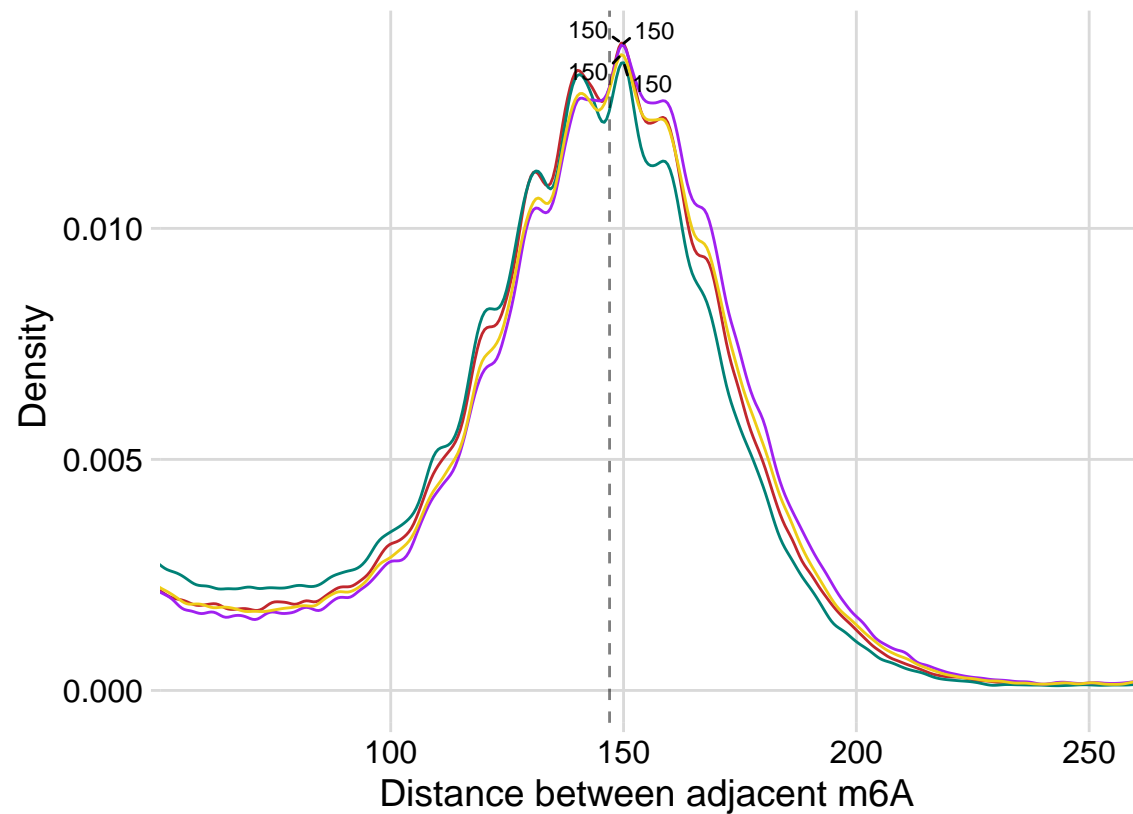

Supplement: Supplemental_Code.zip [file PS00075_1-distance-between-adjacent-m6A.pdf › Fiber-m6A-figures-and-tables-0.0.1/Figures/PS00075_1-distance-between-adjacent-m6A.pdf]

Model CNN ipdSummary XGBoost

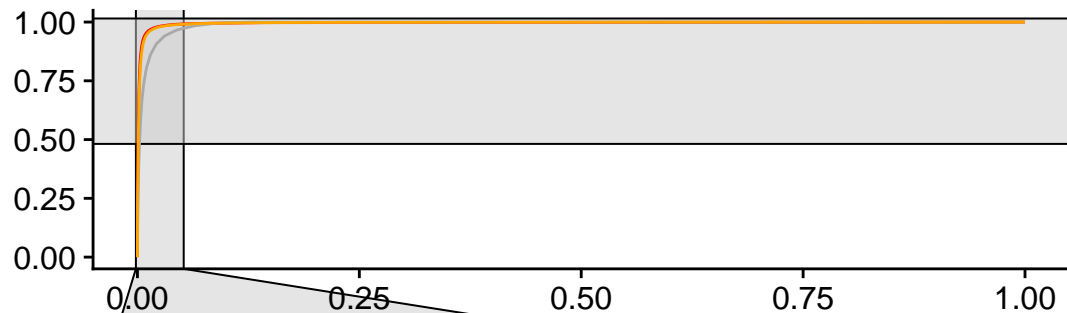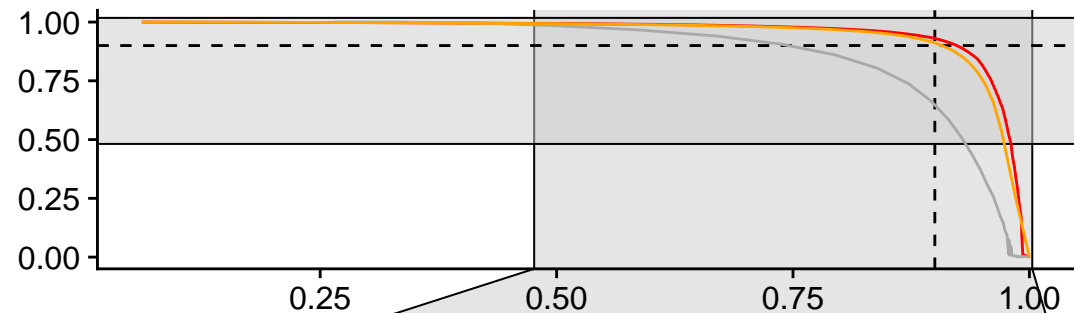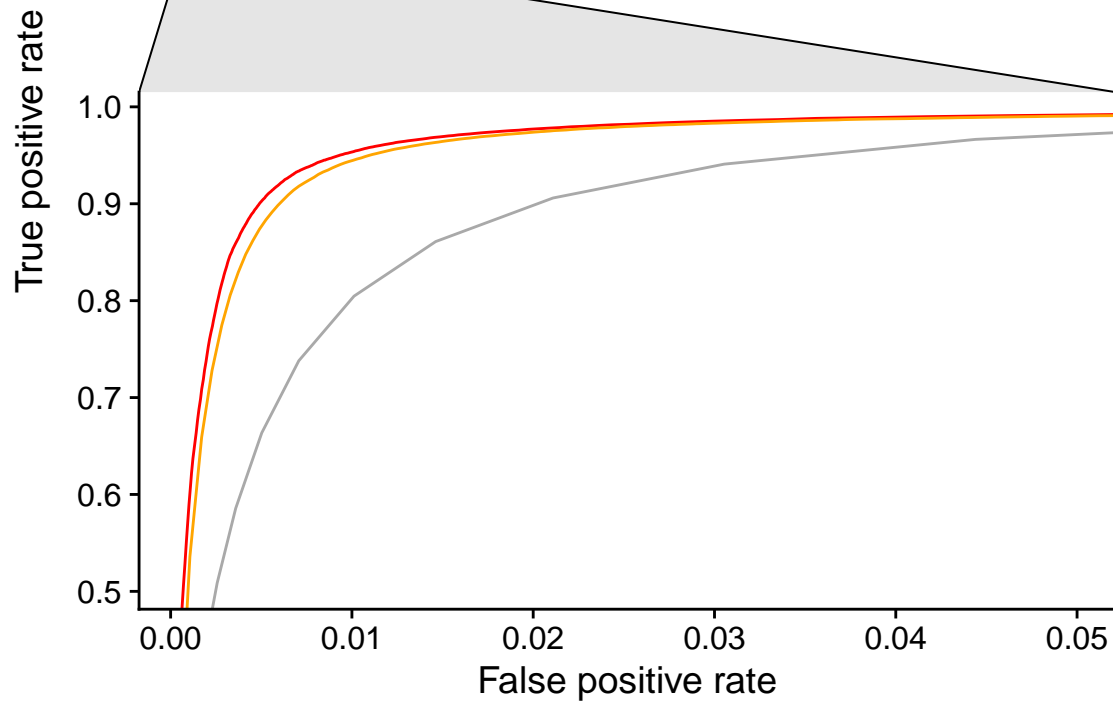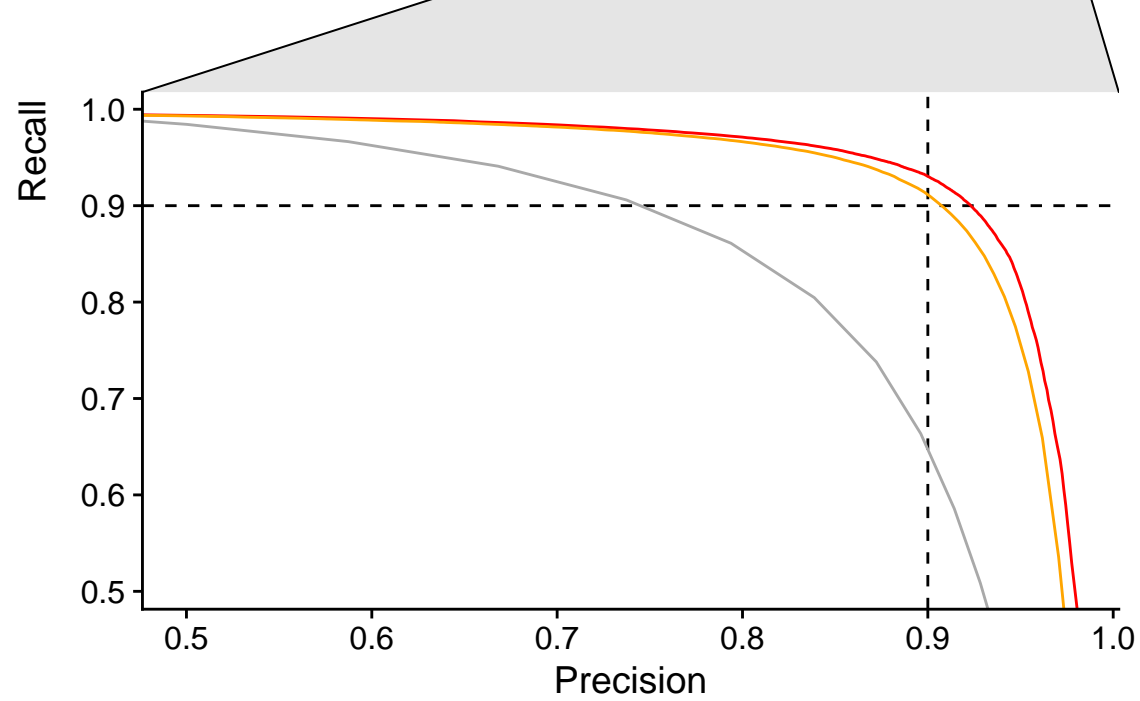

Supplement: Supplemental_Code.zip [file PS00075_1-pr.pdf › Fiber-m6A-figures-and-tables-0.0.1/Figures/PS00075_1-pr.pdf]

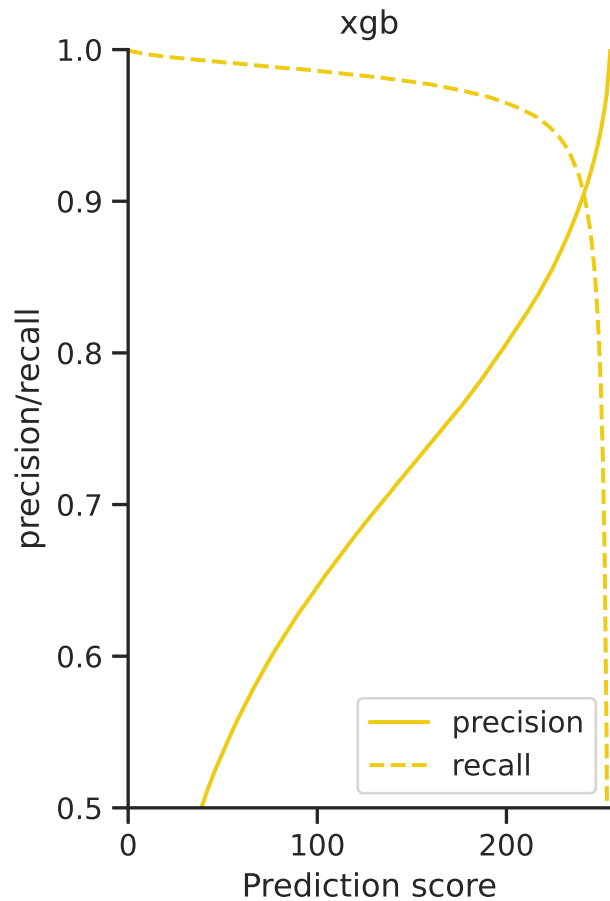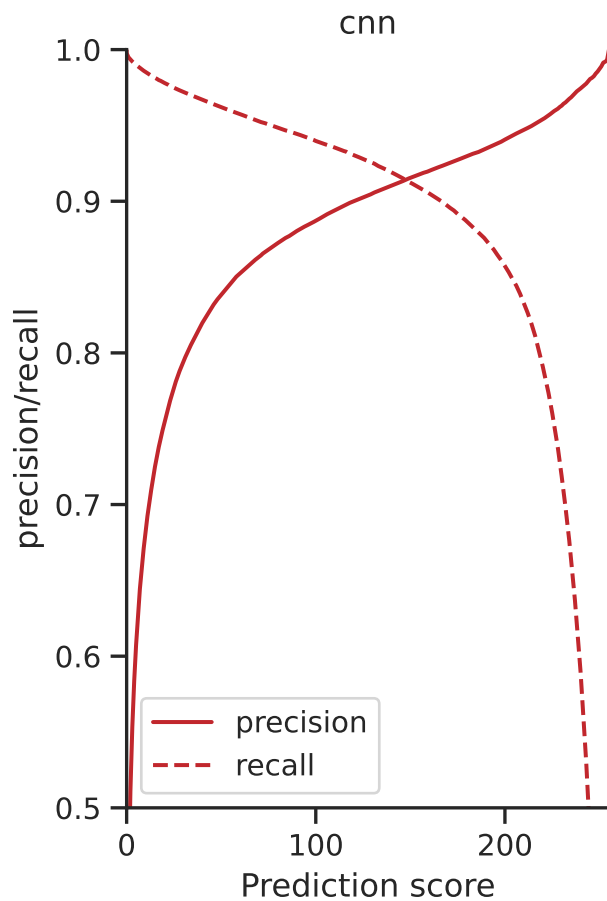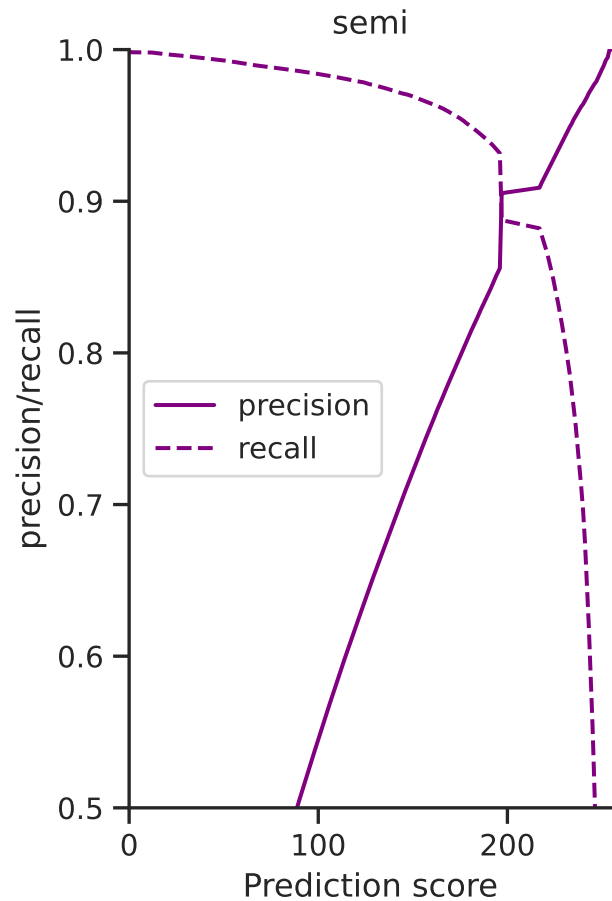

Supplement: Supplemental_Code.zip [file PS00075_1-precision-recall-threshold.pdf › Fiber-m6A-figures-and-tables-0.0.1/Figures/PS00075_1-precision-recall-threshold.pdf]

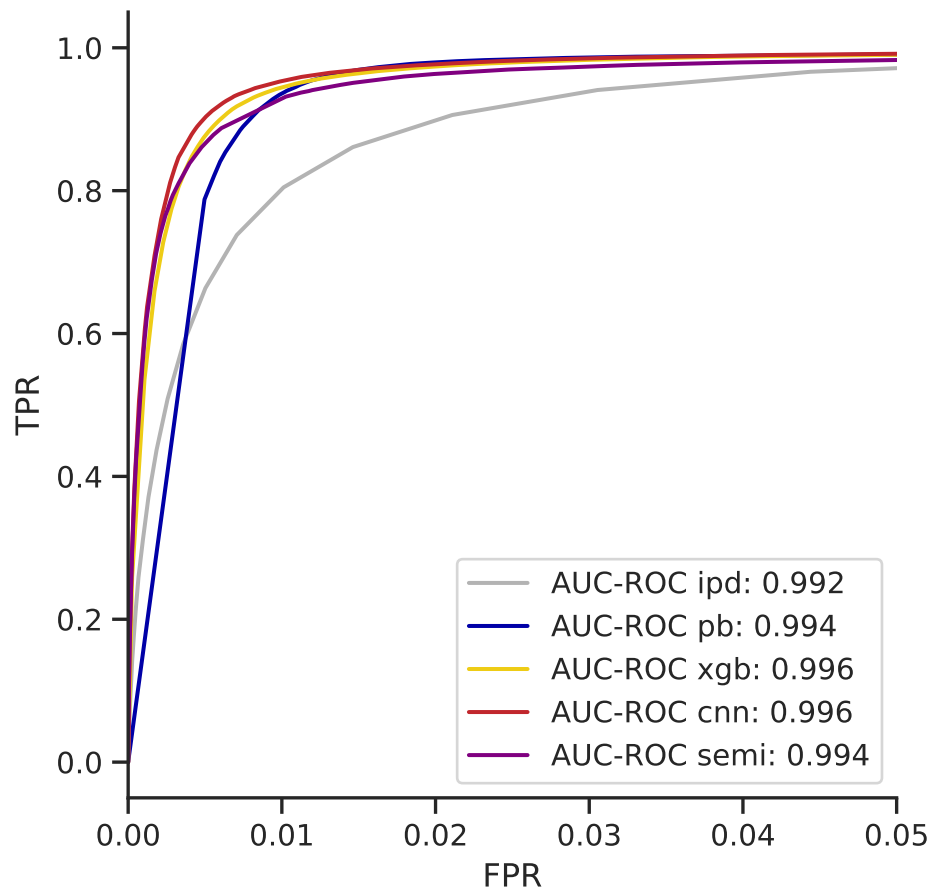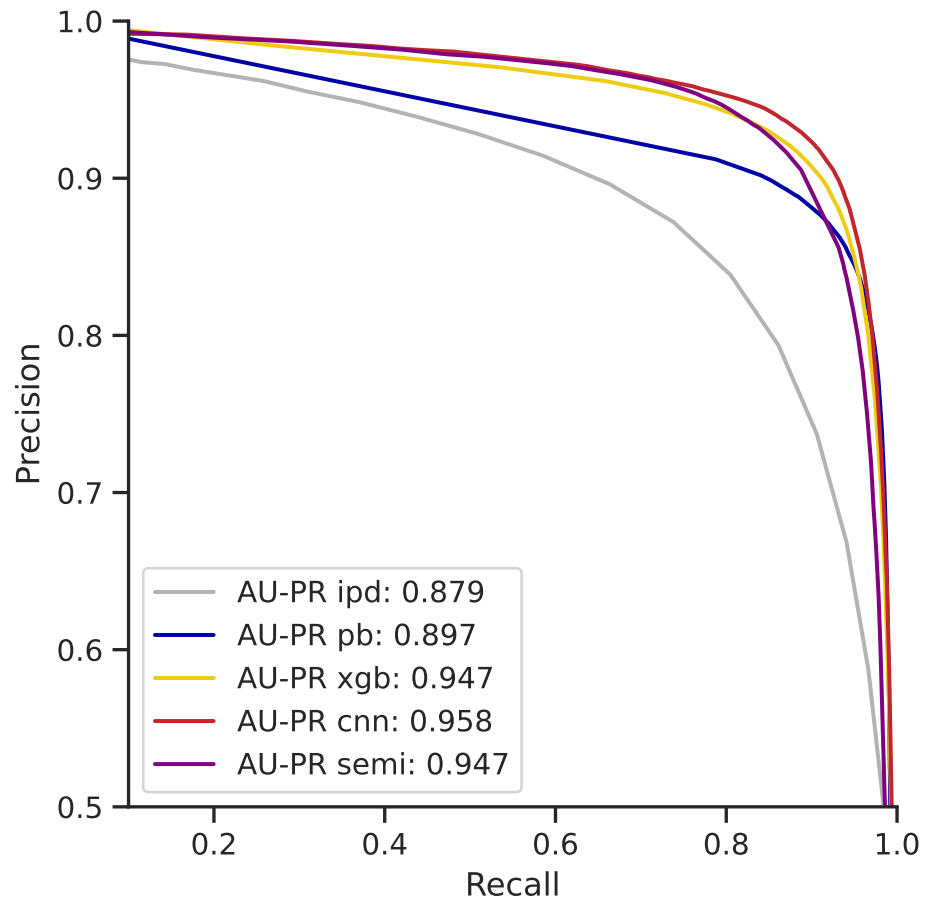

Supplement: Supplemental_Code.zip [file PS00075_1-precision-recall.pdf › Fiber-m6A-figures-and-tables-0.0.1/Figures/PS00075_1-precision-recall.pdf]

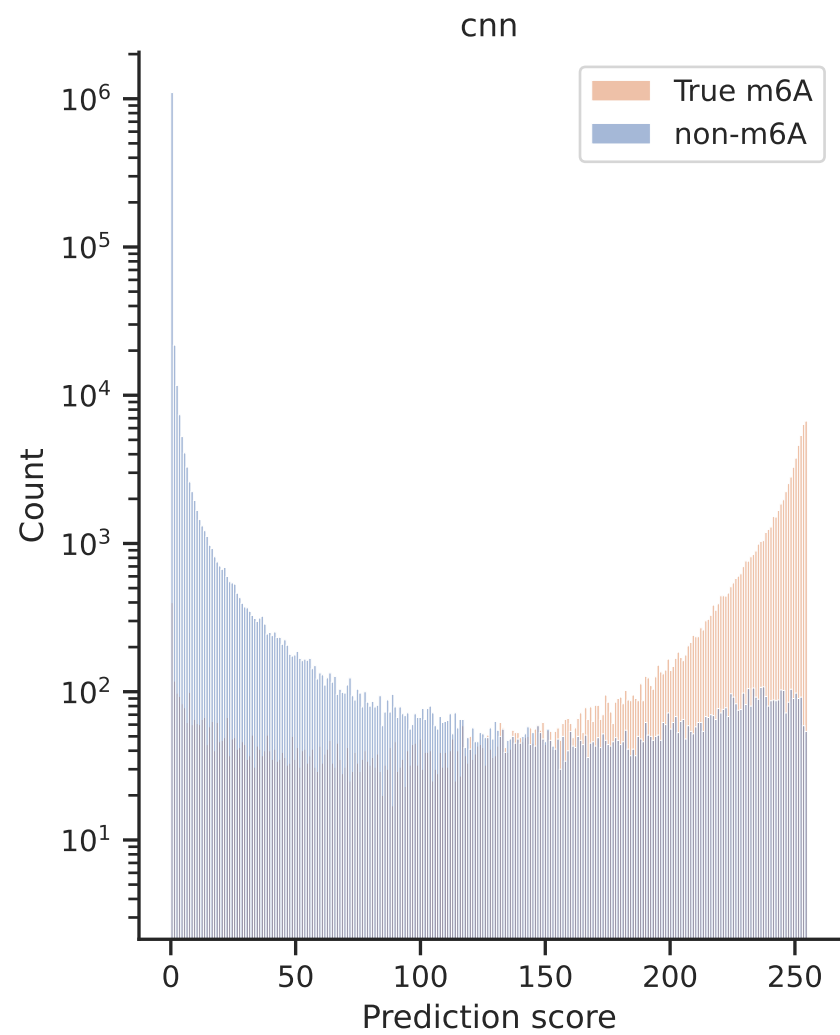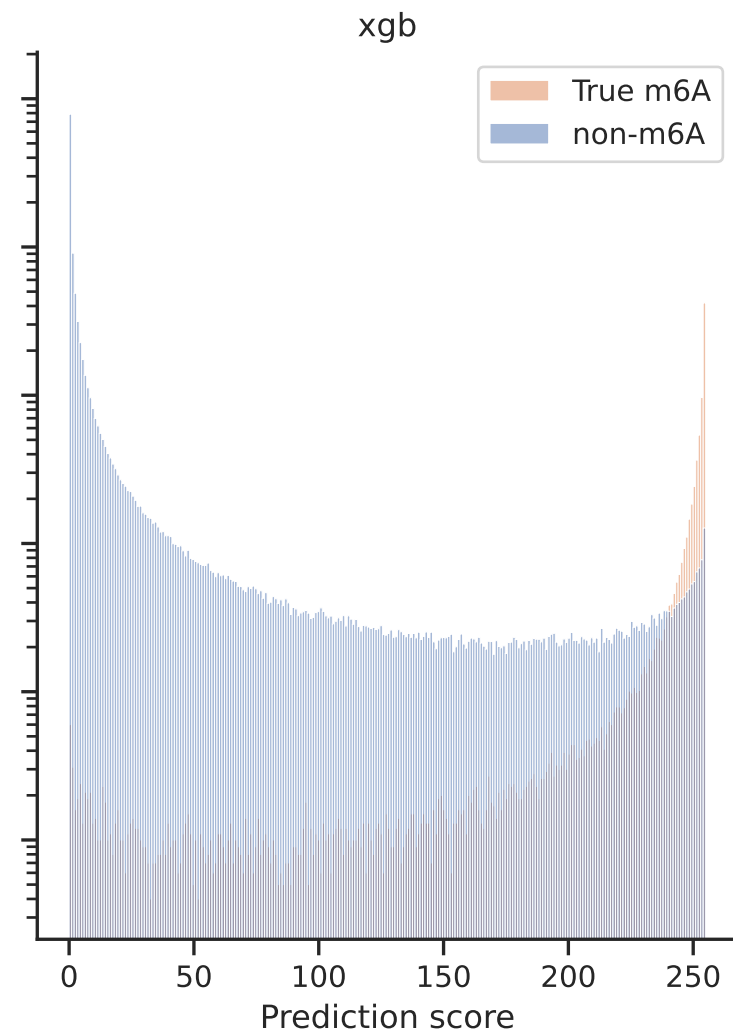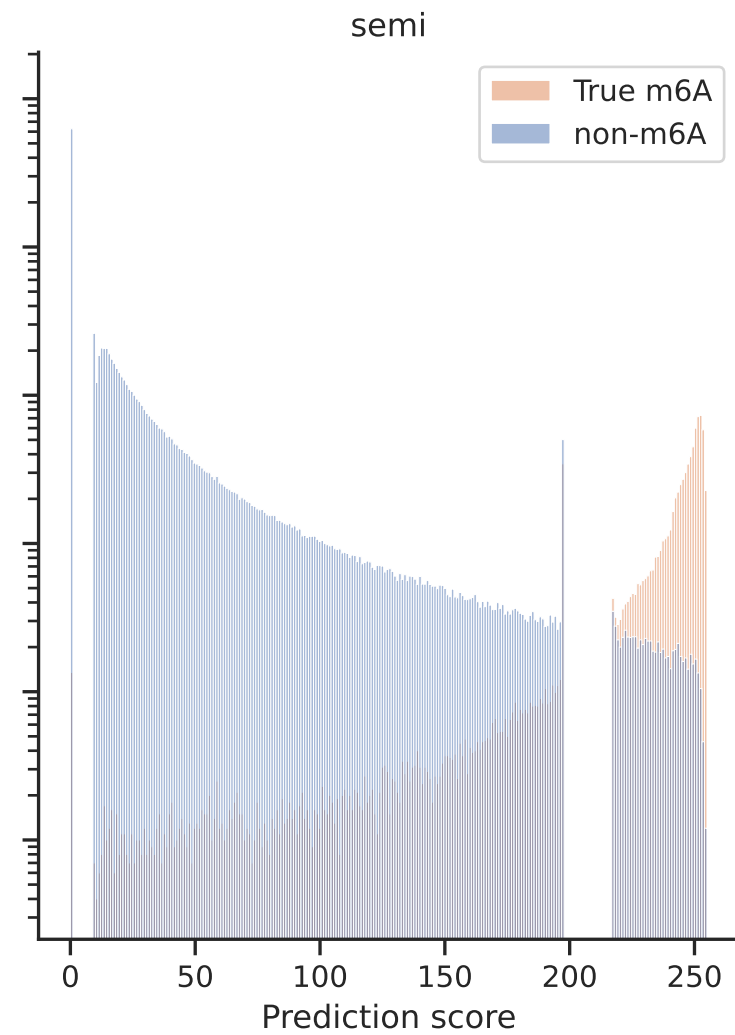

Supplement: Supplemental_Code.zip [file PS00075_1-quality-vs-m6A-status.pdf › Fiber-m6A-figures-and-tables-0.0.1/Figures/PS00075_1-quality-vs-m6A-status.pdf]

Model

- CNN
- ipdSummary
- XGBoost

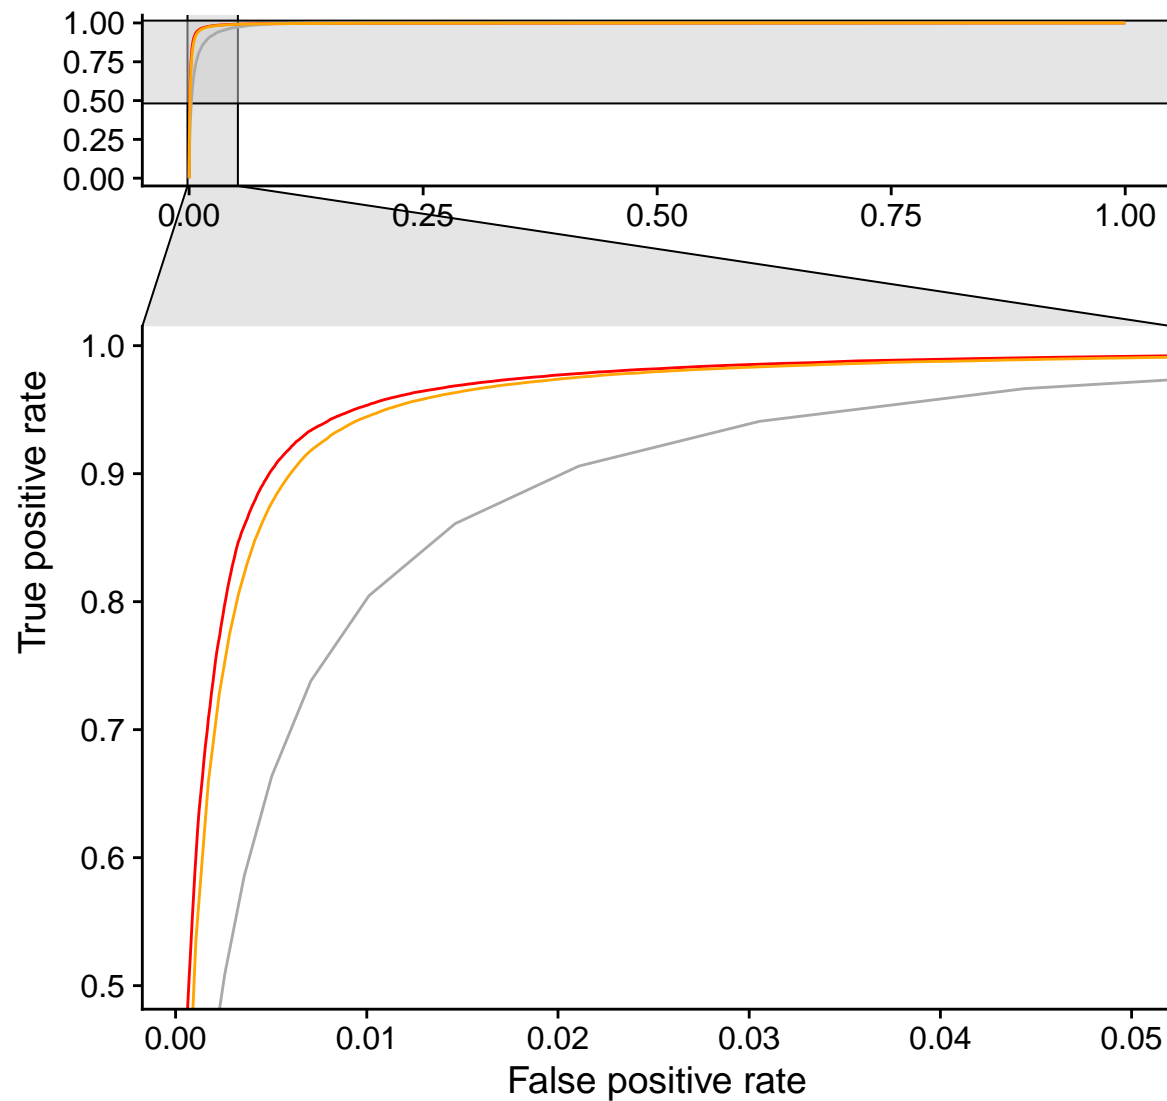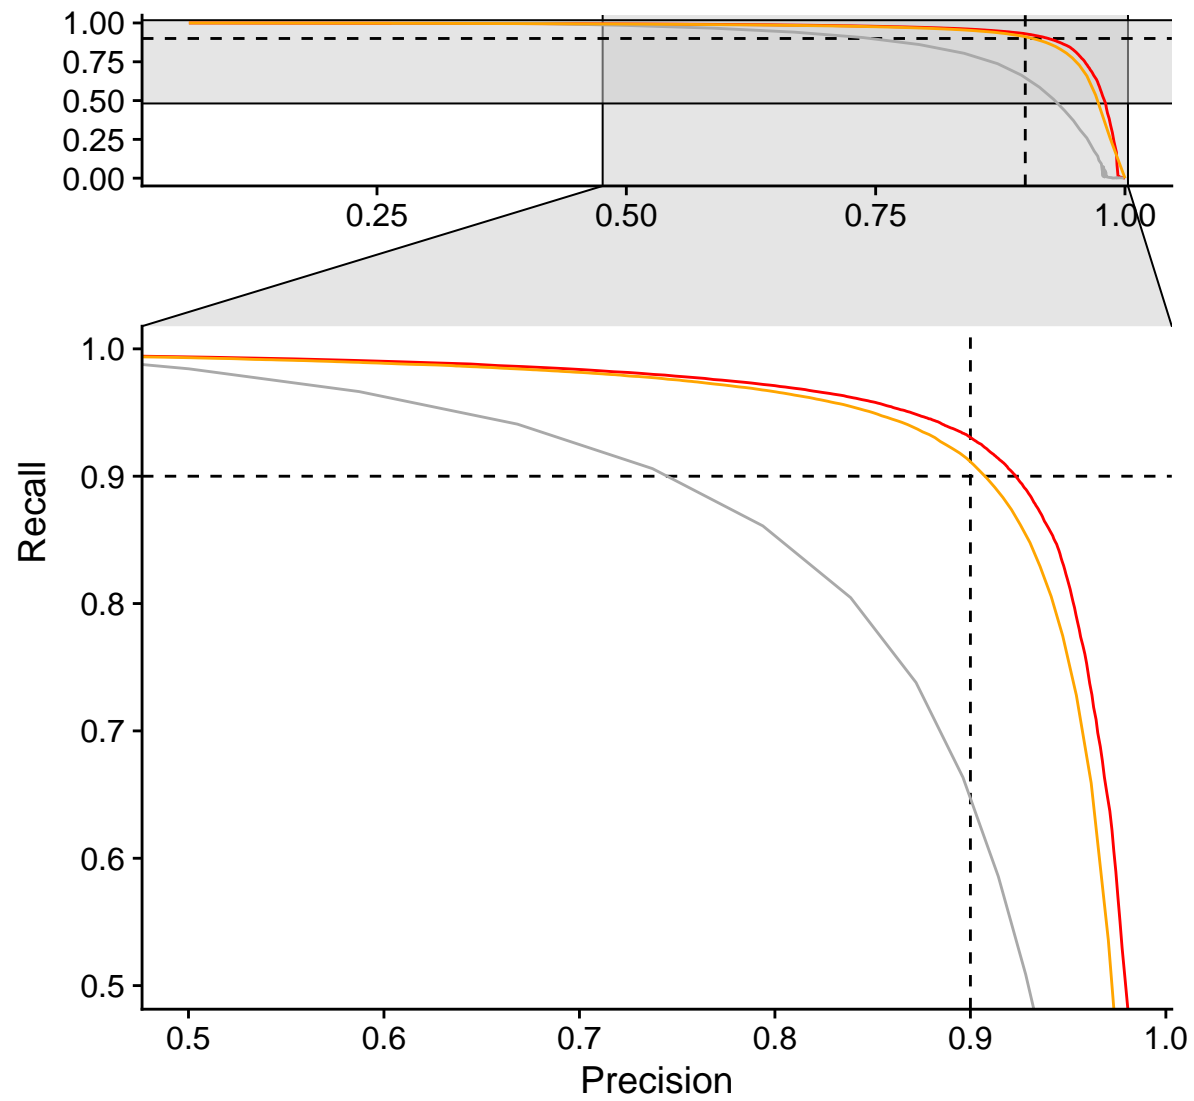

Supplement: Supplemental_Code.zip [file PS00075_1-roc-and-pr.pdf › Fiber-m6A-figures-and-tables-0.0.1/Figures/PS00075_1-roc-and-pr.pdf]

—•— PacBio   
 —•— XGB   
 —•— IPD  
—•— CNN   
 —•— GMM   
 —•— SEMI

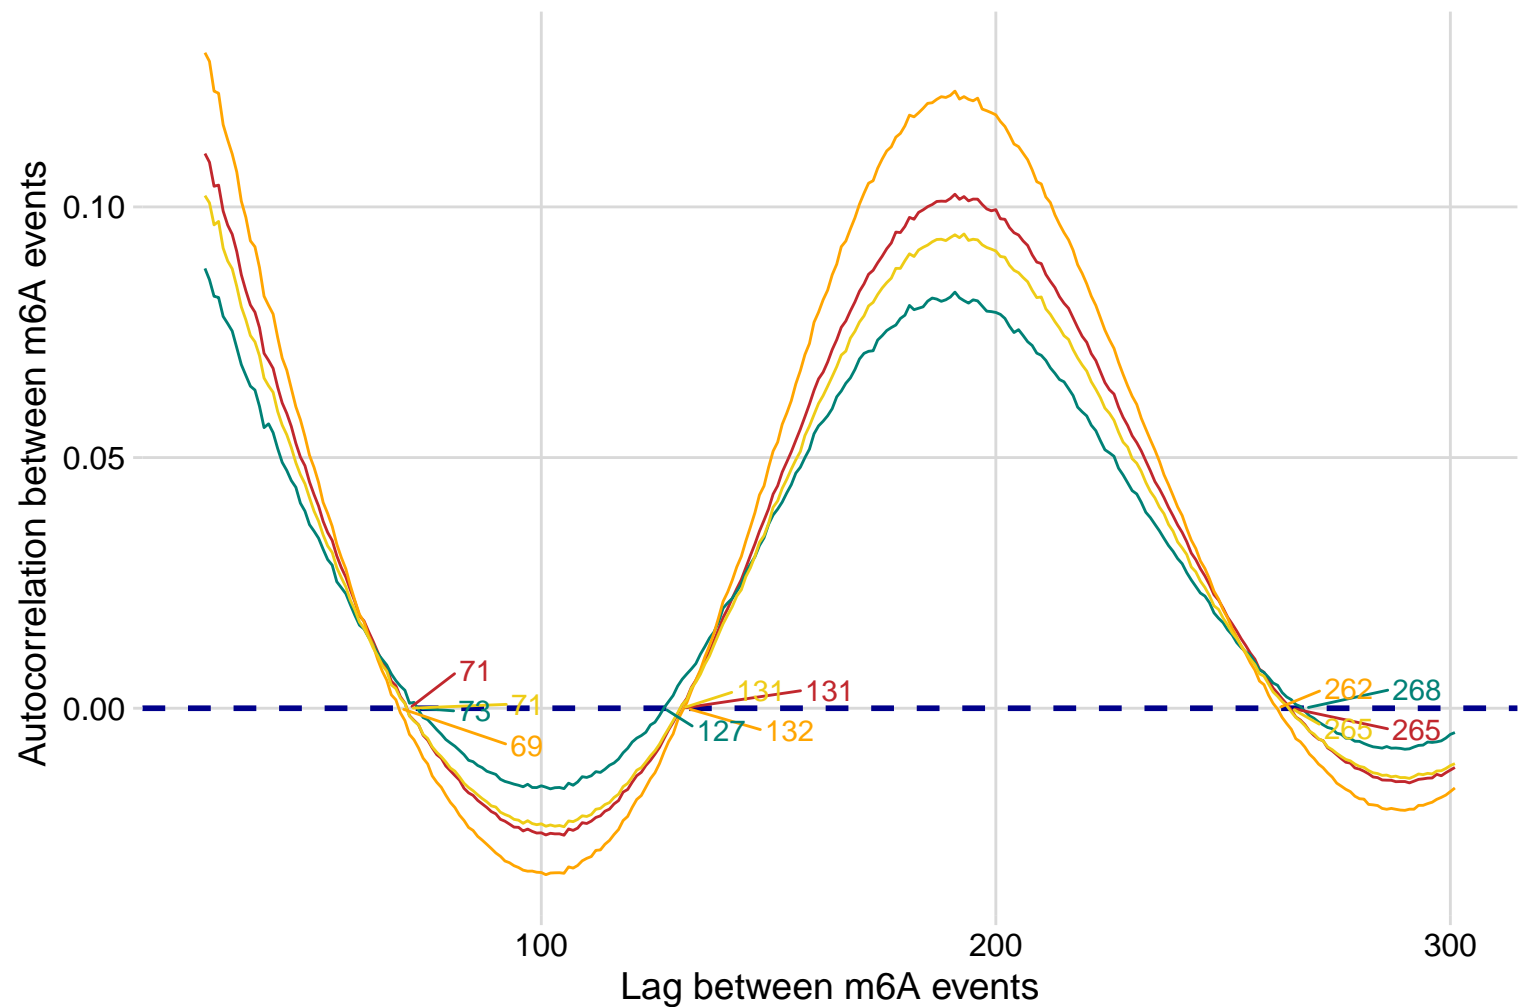

Supplement: Supplemental_Code.zip [file PS00109_1-autocorrelation-between-m6A.pdf › Fiber-m6A-figures-and-tables-0.0.1/Figures/PS00109_1-autocorrelation-between-m6A.pdf]

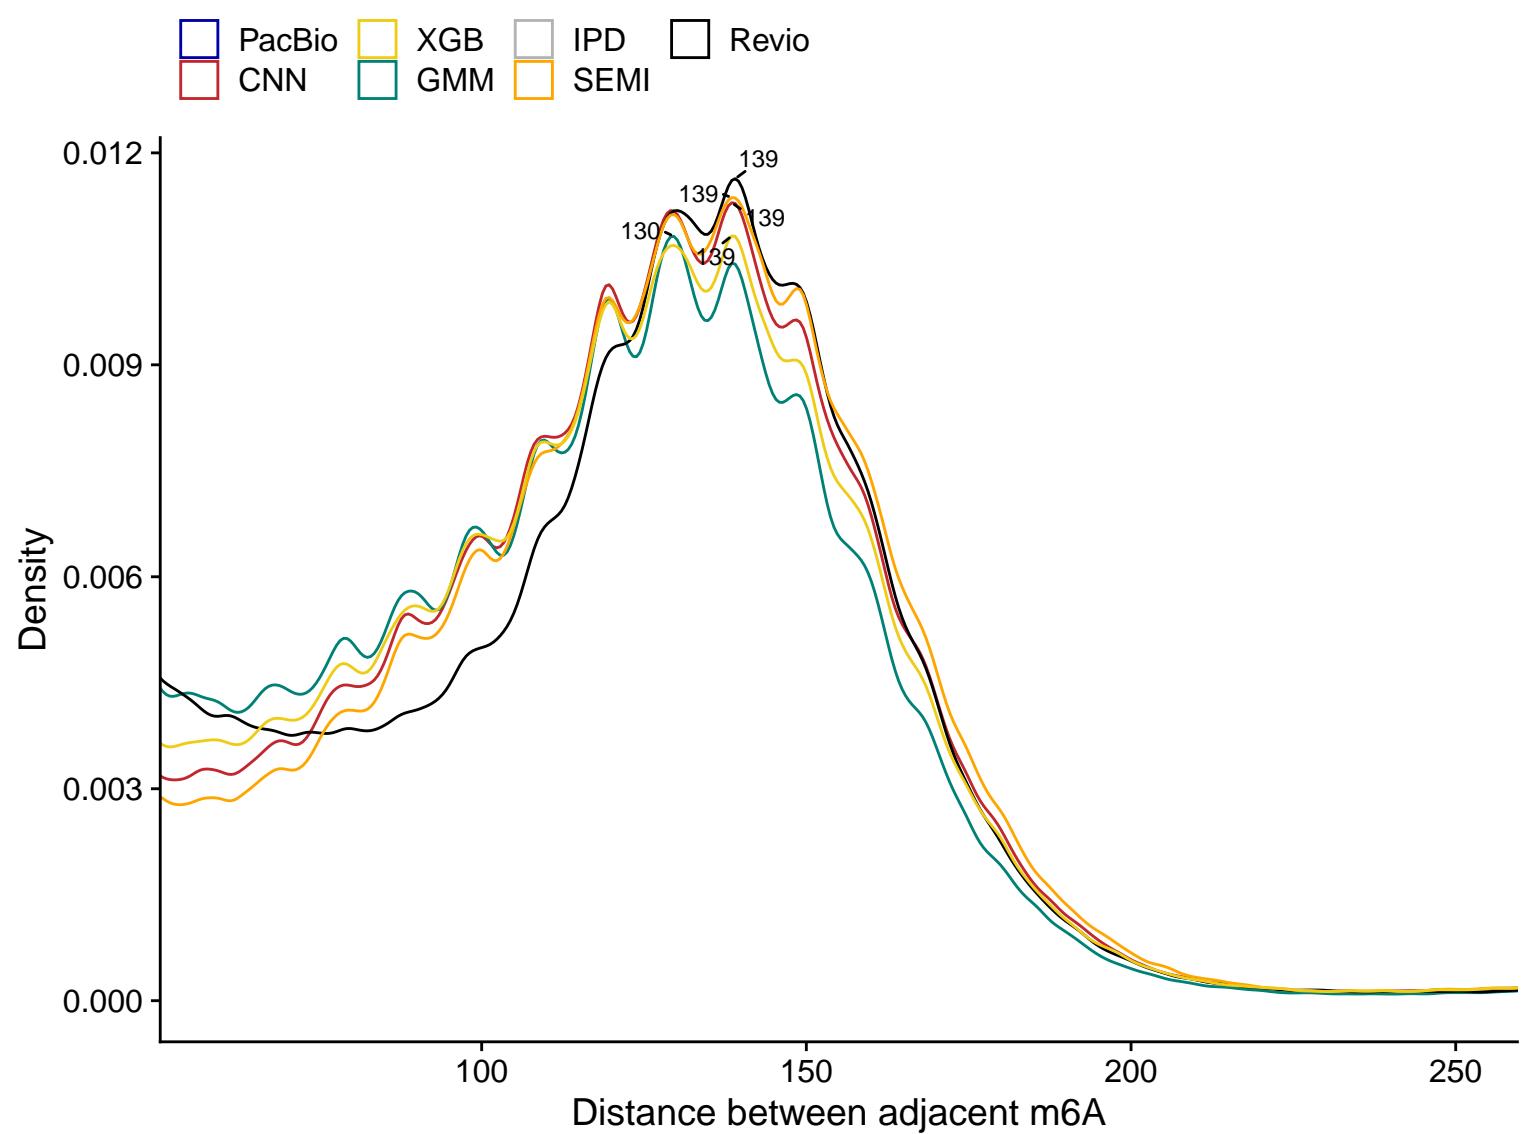

Supplement: Supplemental_Code.zip [file PS00109_1-distance-between-adjacent-m6A.pdf › Fiber-m6A-figures-and-tables-0.0.1/Figures/PS00109_1-distance-between-adjacent-m6A.pdf]

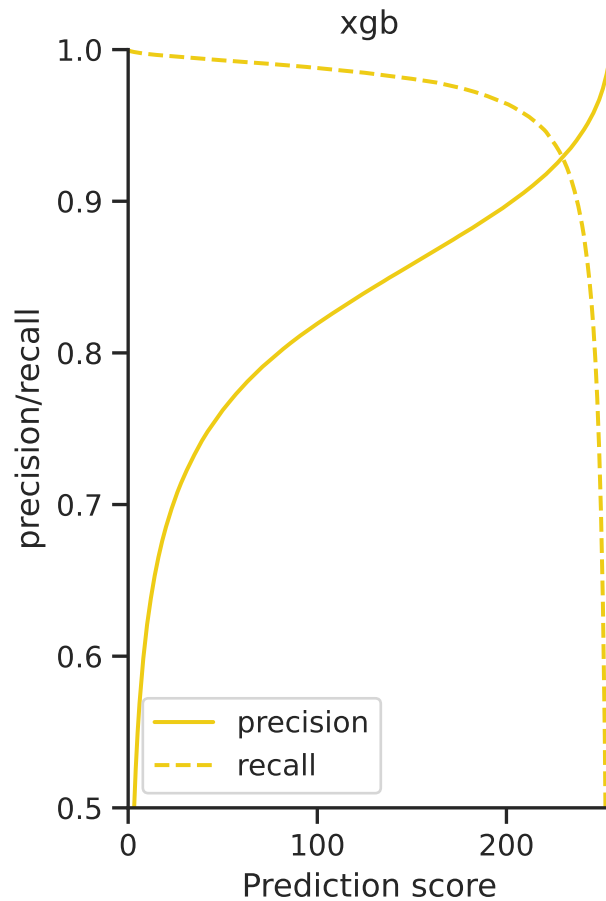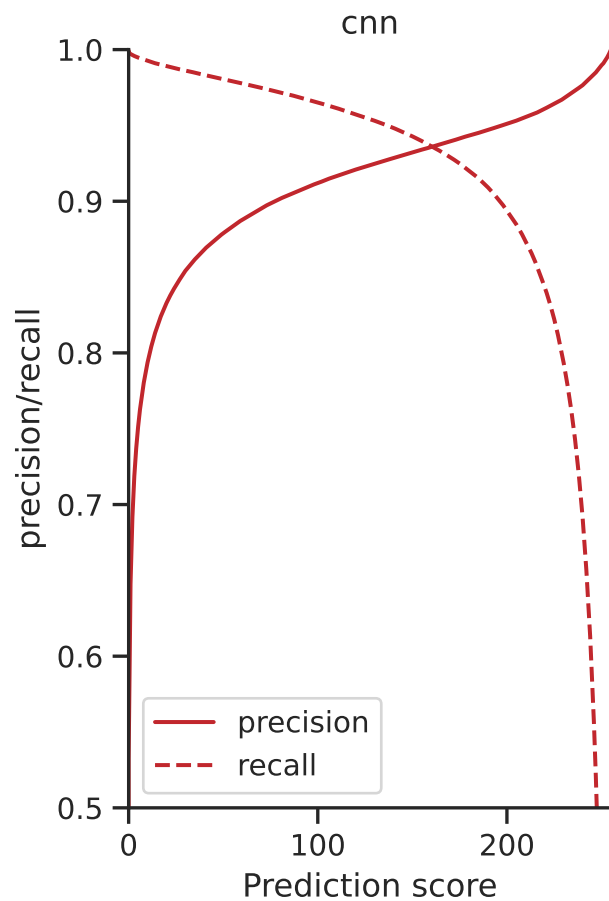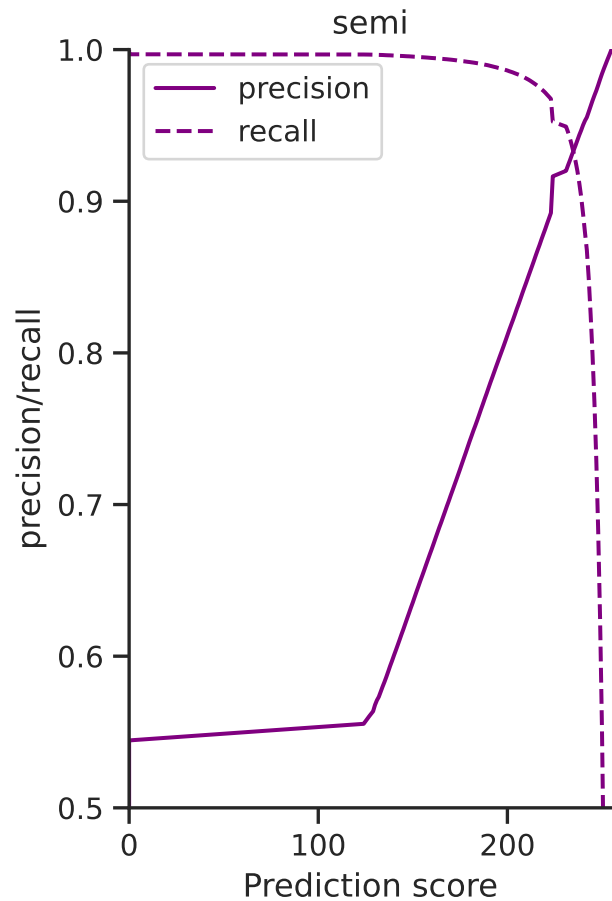

Supplement: Supplemental_Code.zip [file PS00109_1-precision-recall-threshold.pdf › Fiber-m6A-figures-and-tables-0.0.1/Figures/PS00109_1-precision-recall-threshold.pdf]

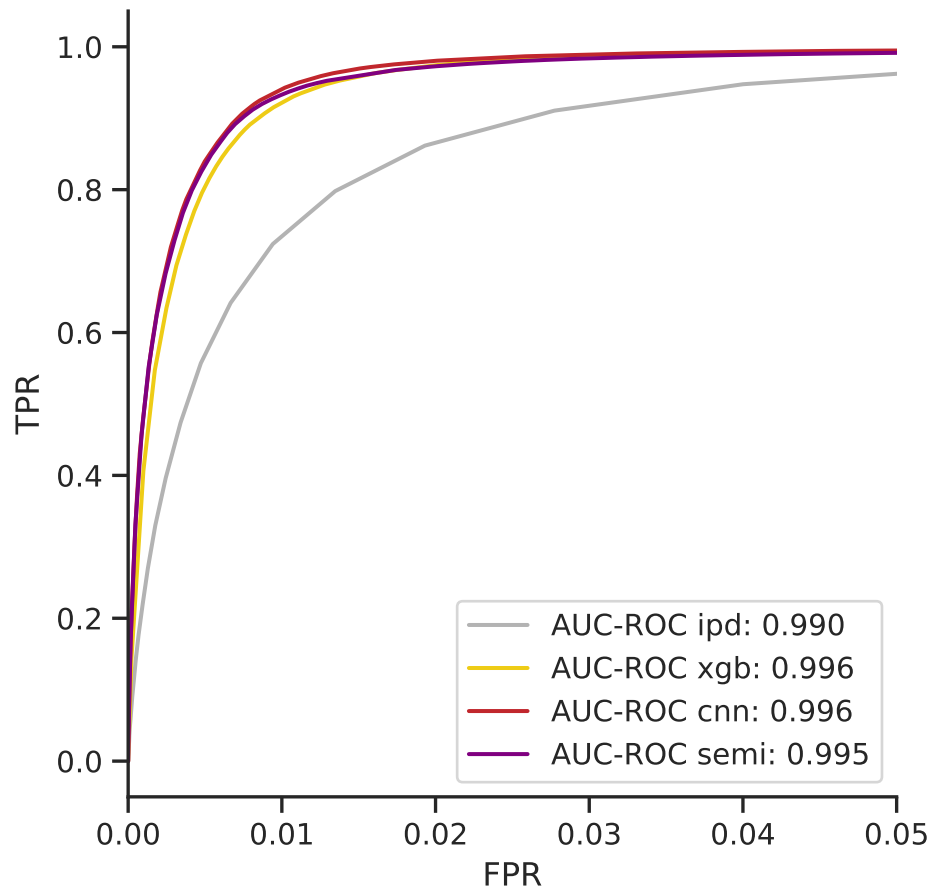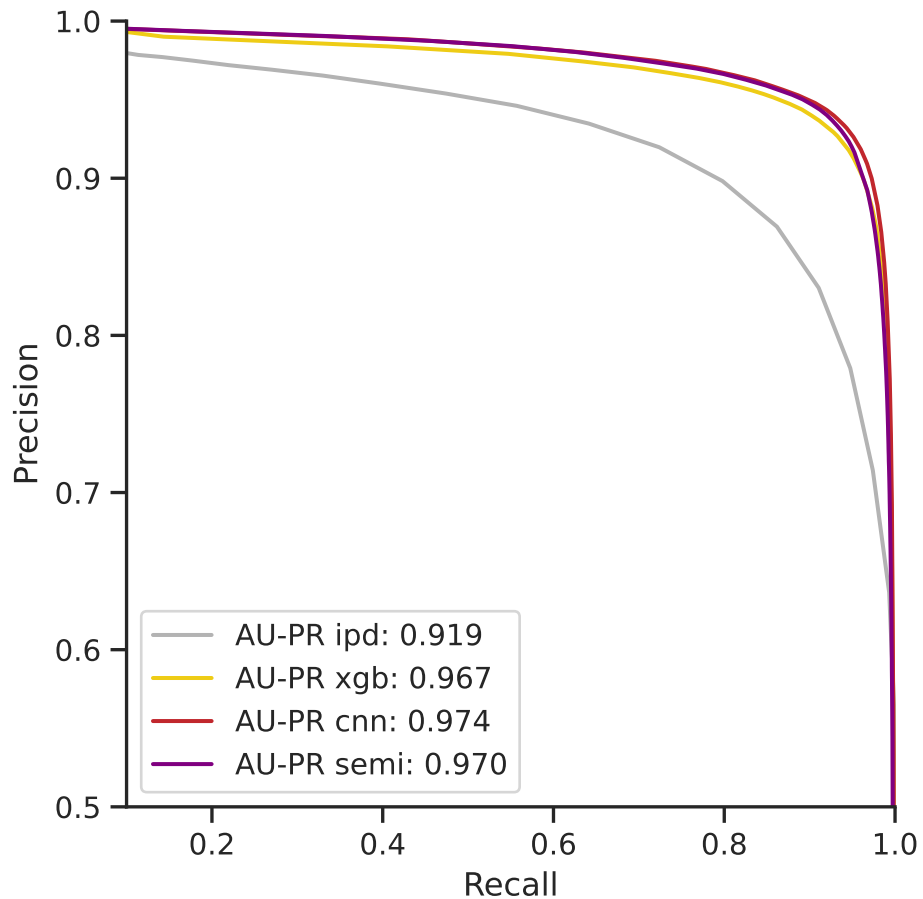

Supplement: Supplemental_Code.zip [file PS00109_1-precision-recall.pdf › Fiber-m6A-figures-and-tables-0.0.1/Figures/PS00109_1-precision-recall.pdf]

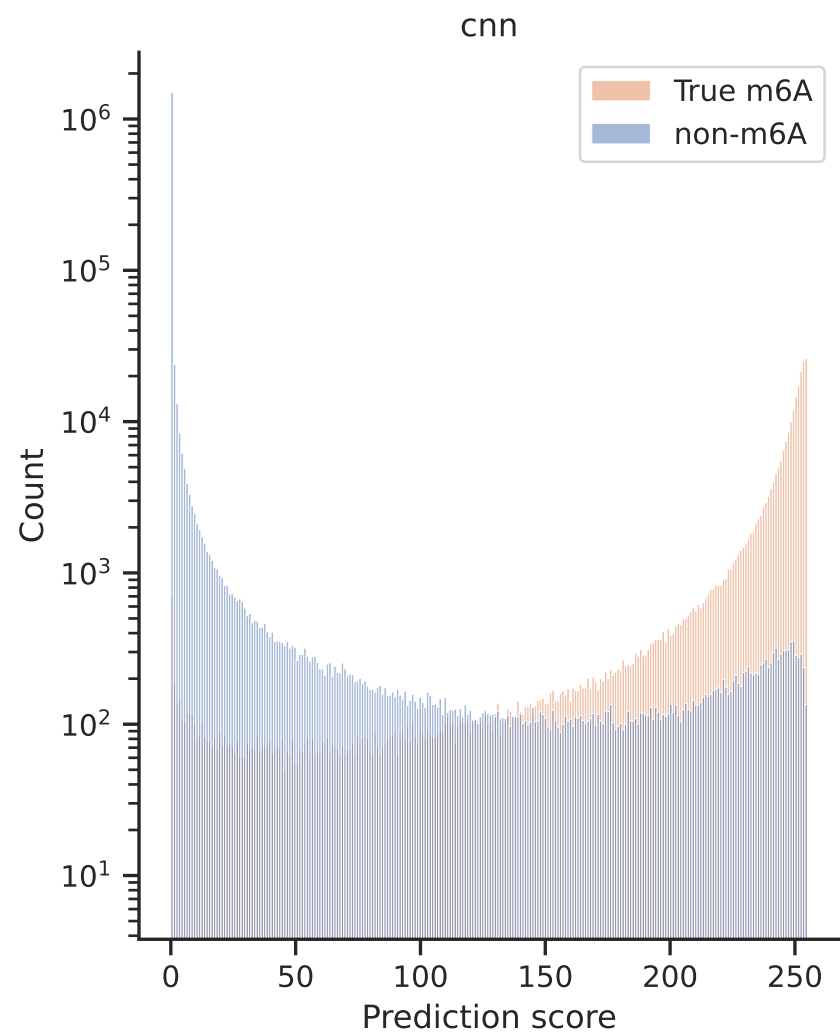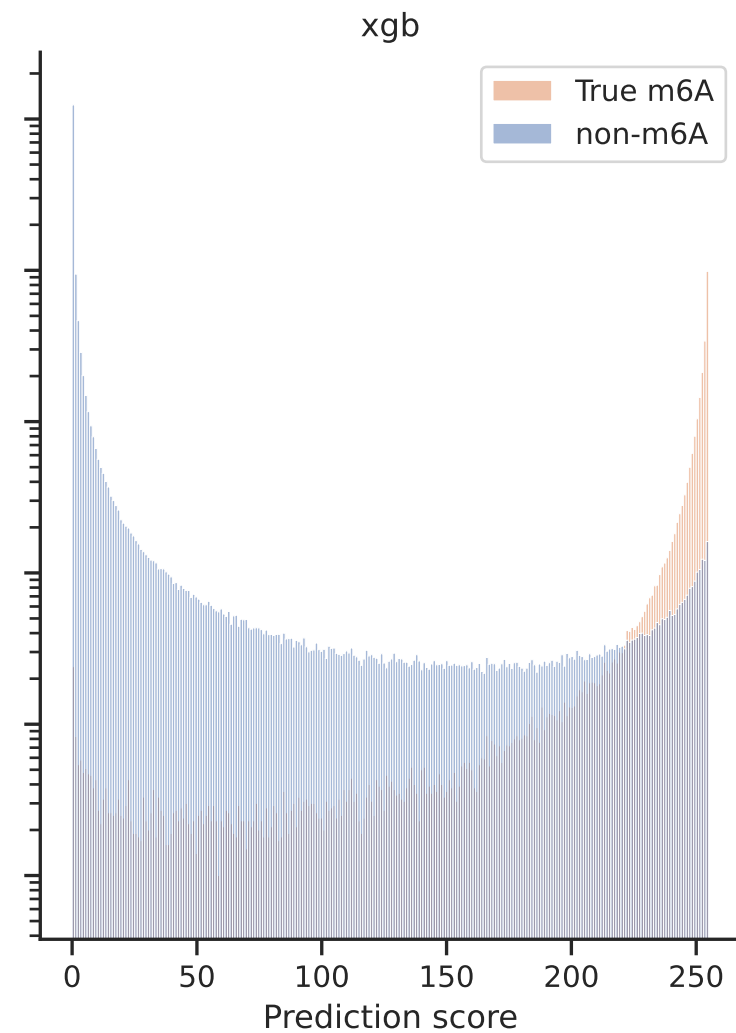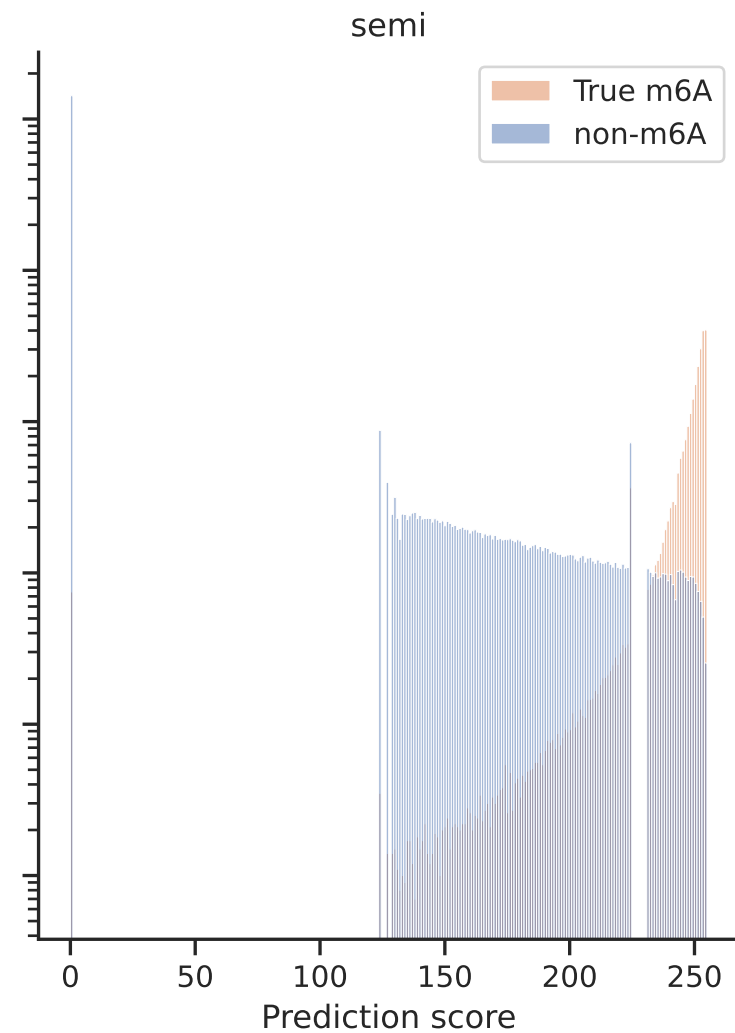

Supplement: Supplemental_Code.zip [file PS00109_1-quality-vs-m6A-status.pdf › Fiber-m6A-figures-and-tables-0.0.1/Figures/PS00109_1-quality-vs-m6A-status.pdf]

Model    CNN    ipdSummary    XGBoost

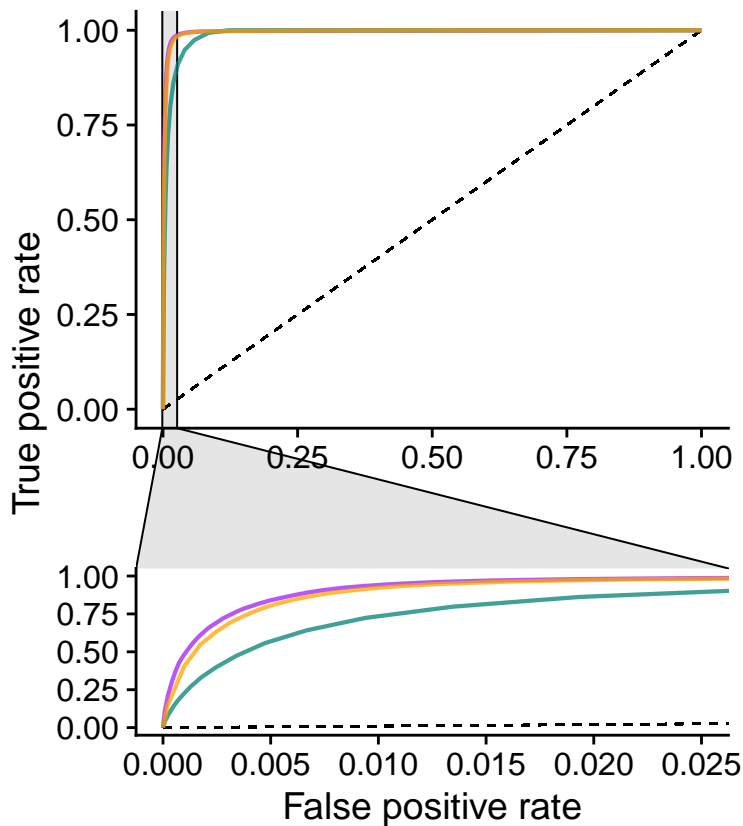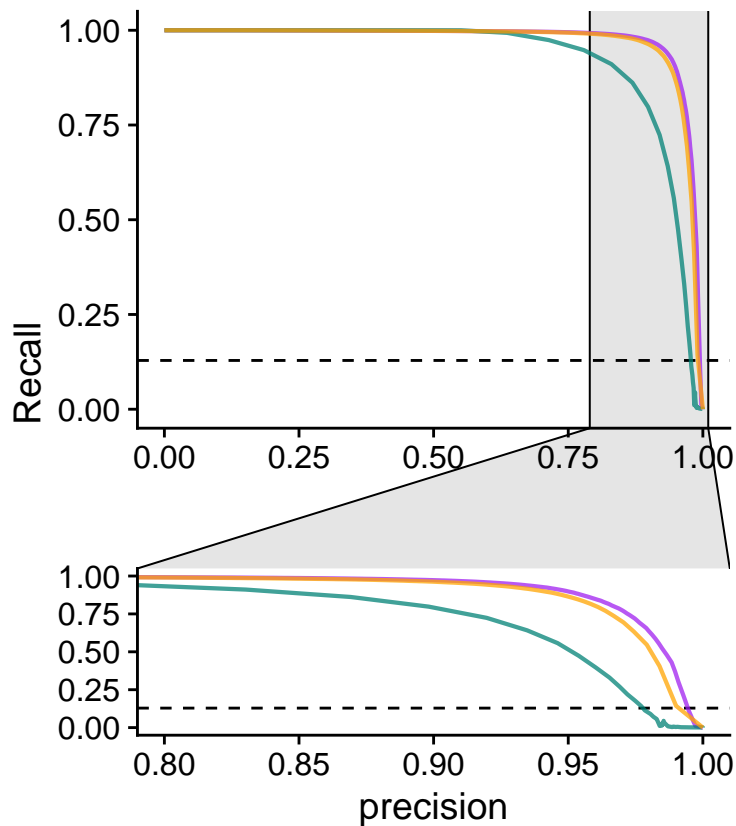

Supplement: Supplemental_Code.zip [file PS00109_1-roc-and-pr.pdf › Fiber-m6A-figures-and-tables-0.0.1/Figures/PS00109_1-roc-and-pr.pdf]

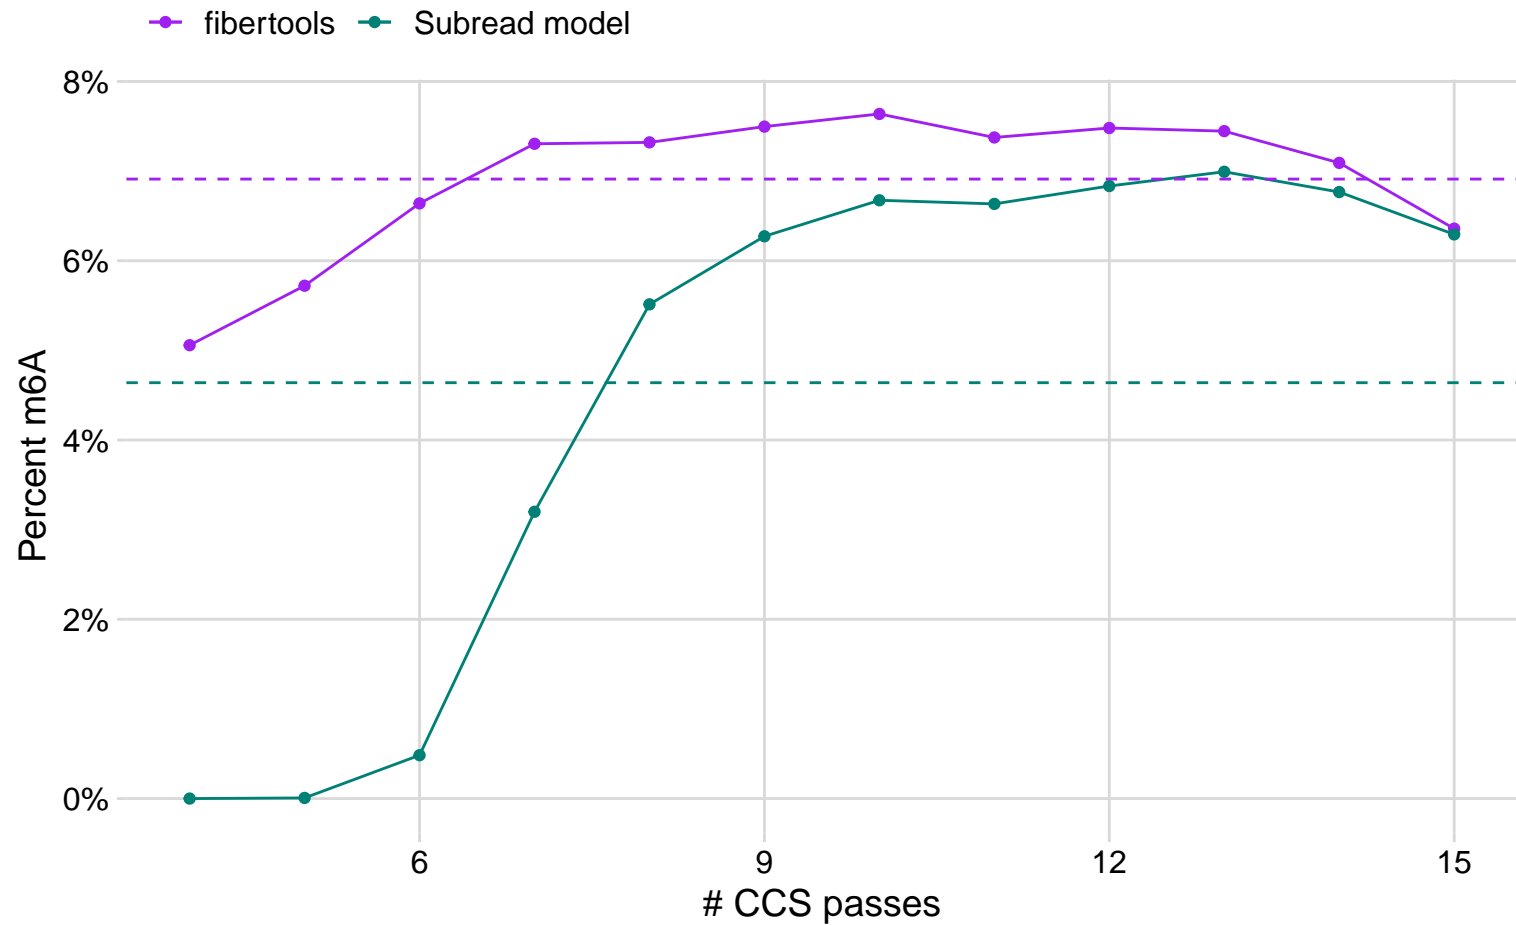

Supplement: Supplemental_Code.zip [file Percent-m6a-by-ccs-coverage.pdf › Fiber-m6A-figures-and-tables-0.0.1/Figures/Percent-m6a-by-ccs-coverage.pdf]

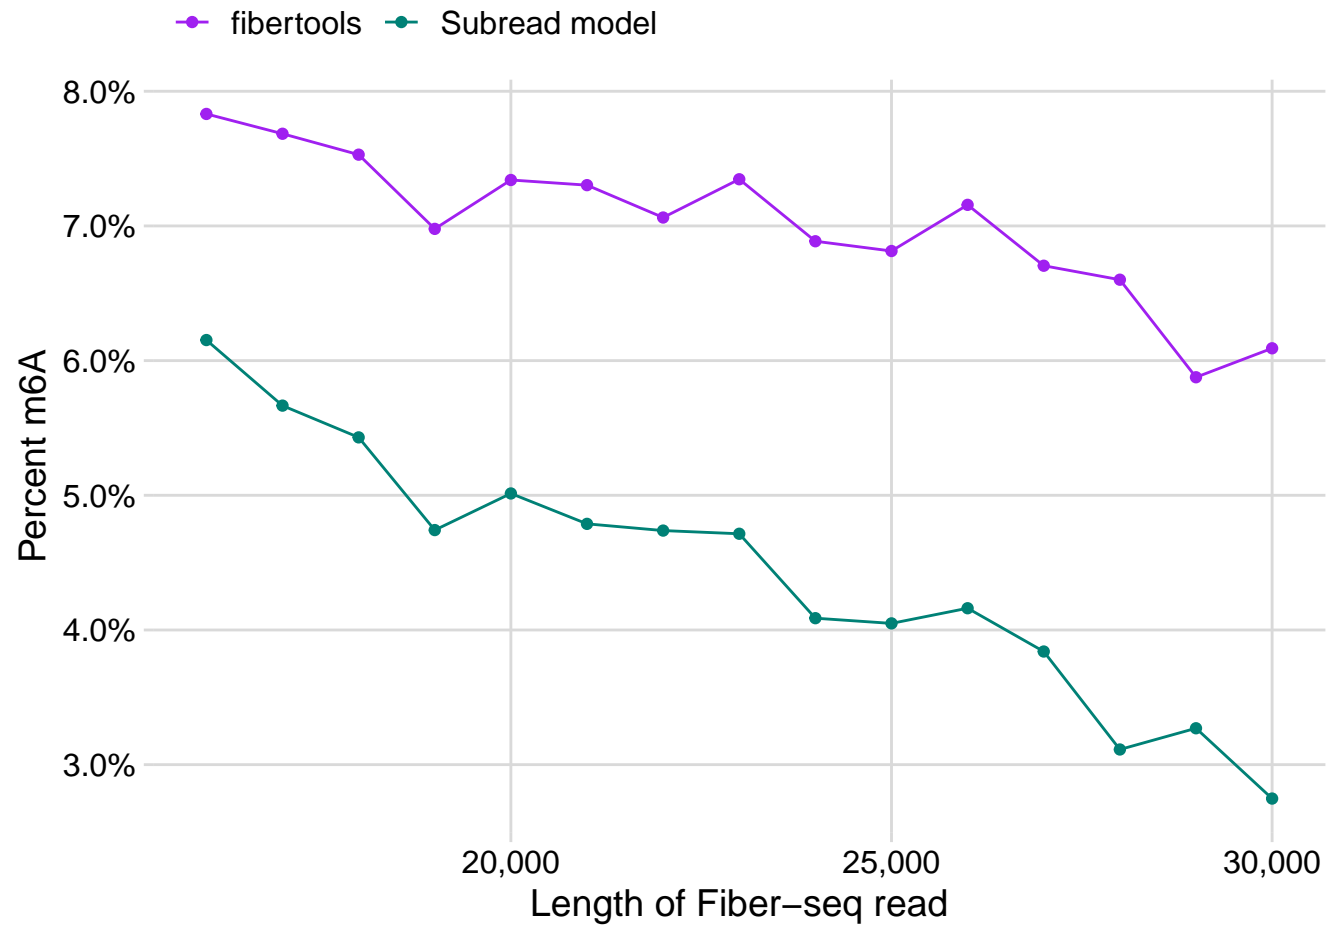

Supplement: Supplemental_Code.zip [file Percent-m6a-by-fiber-length.pdf › Fiber-m6A-figures-and-tables-0.0.1/Figures/Percent-m6a-by-fiber-length.pdf]

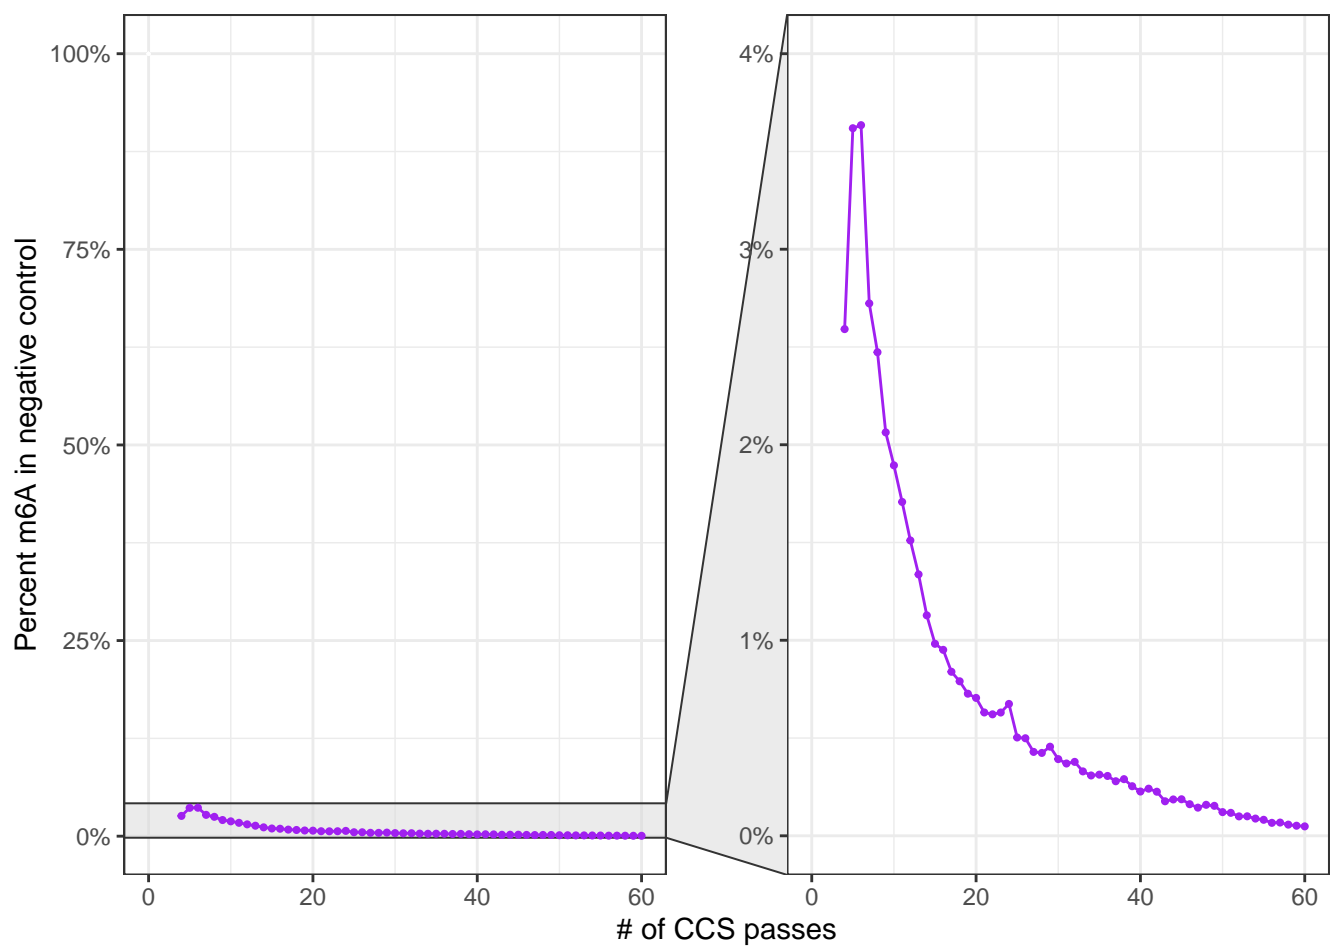

Supplement: Supplemental_Code.zip [file Plasmid-FPR-vs-passes.pdf › Fiber-m6A-figures-and-tables-0.0.1/Figures/Plasmid-FPR-vs-passes.pdf]

Other Dam

Fiber-seq reads

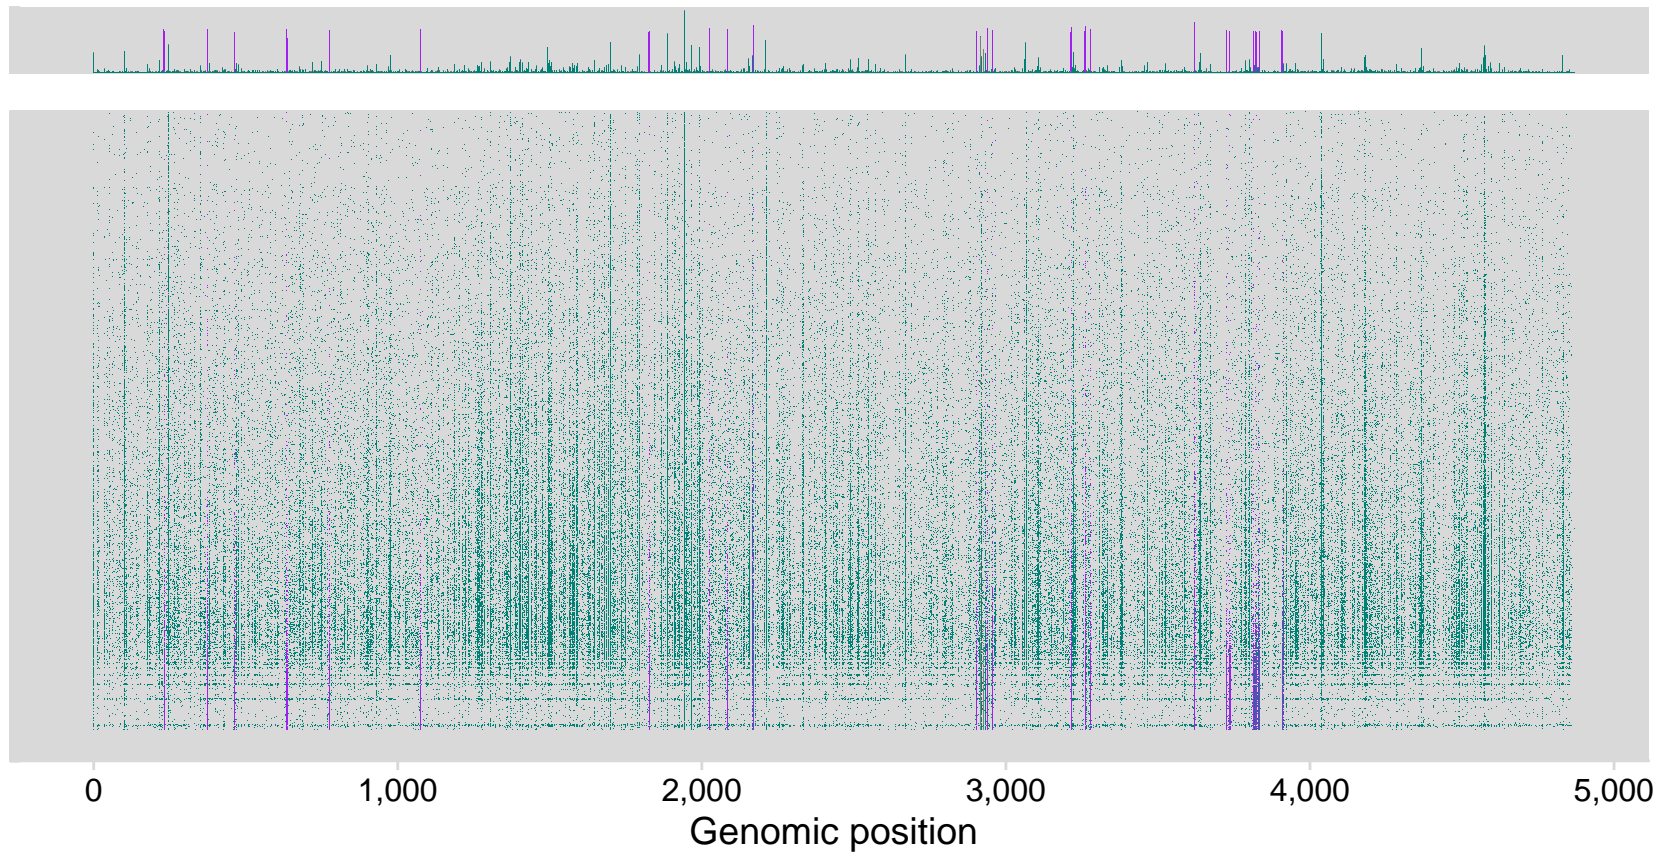

Supplement: Supplemental_Code.zip [file Plasmid_reference.pdf › Fiber-m6A-figures-and-tables-0.0.1/Figures/Plasmid_reference.pdf]

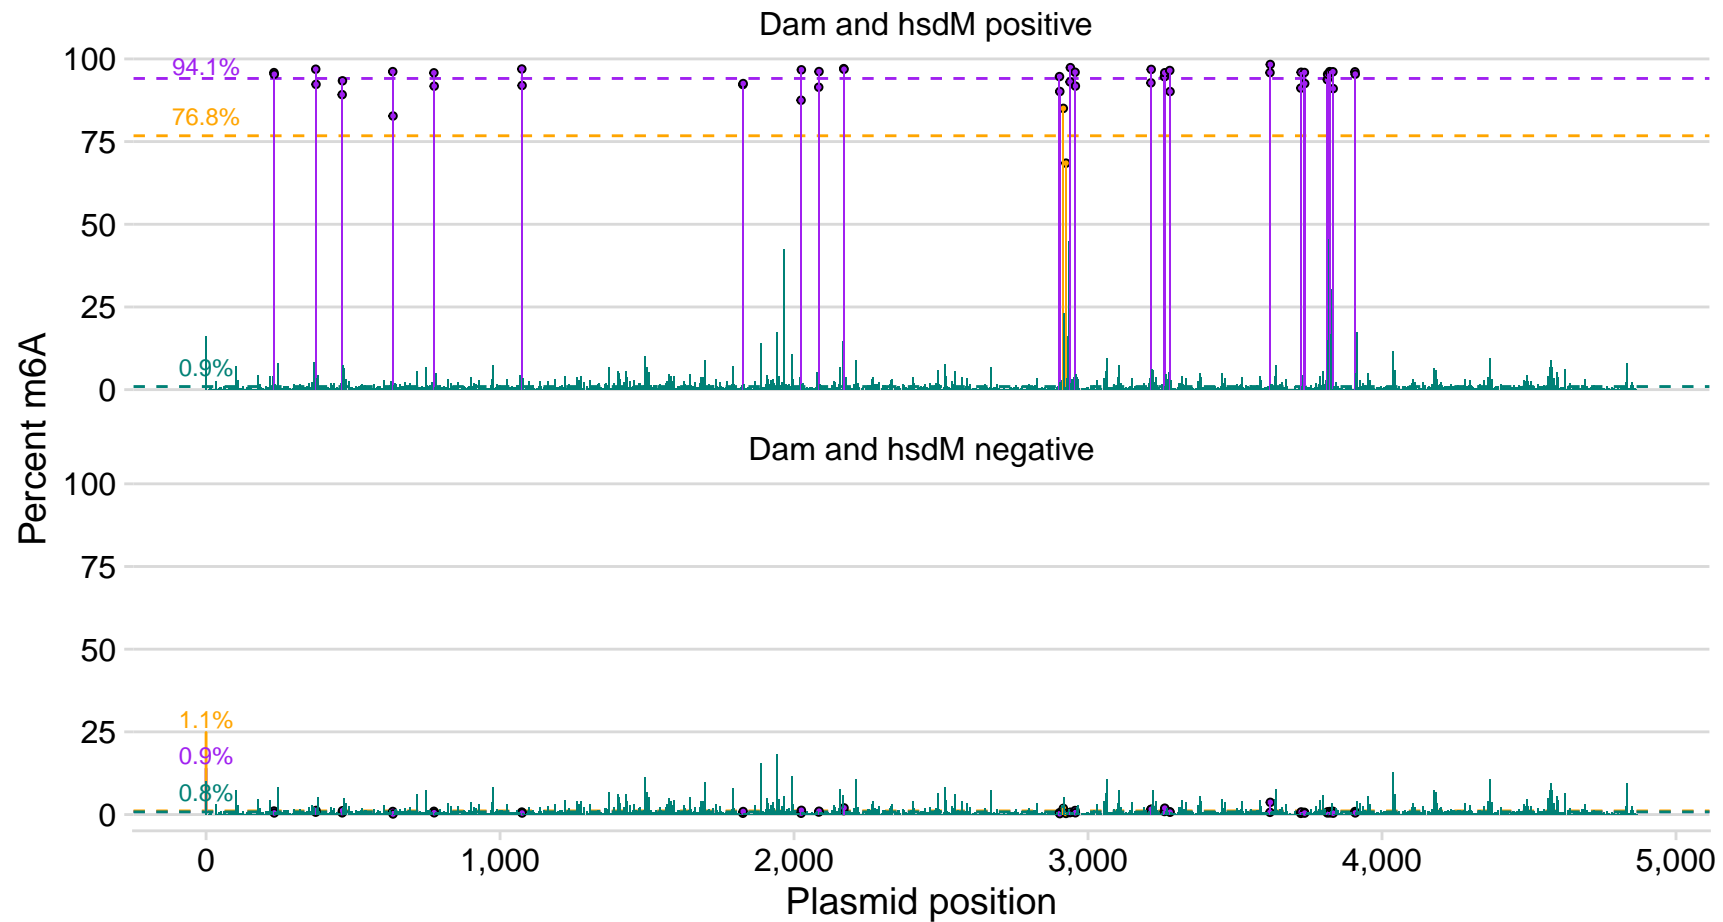

Supplement: Supplemental_Code.zip [file Plasmid_simple_reference.pdf › Fiber-m6A-figures-and-tables-0.0.1/Figures/Plasmid_simple_reference.pdf]

Percent m6A in WGA

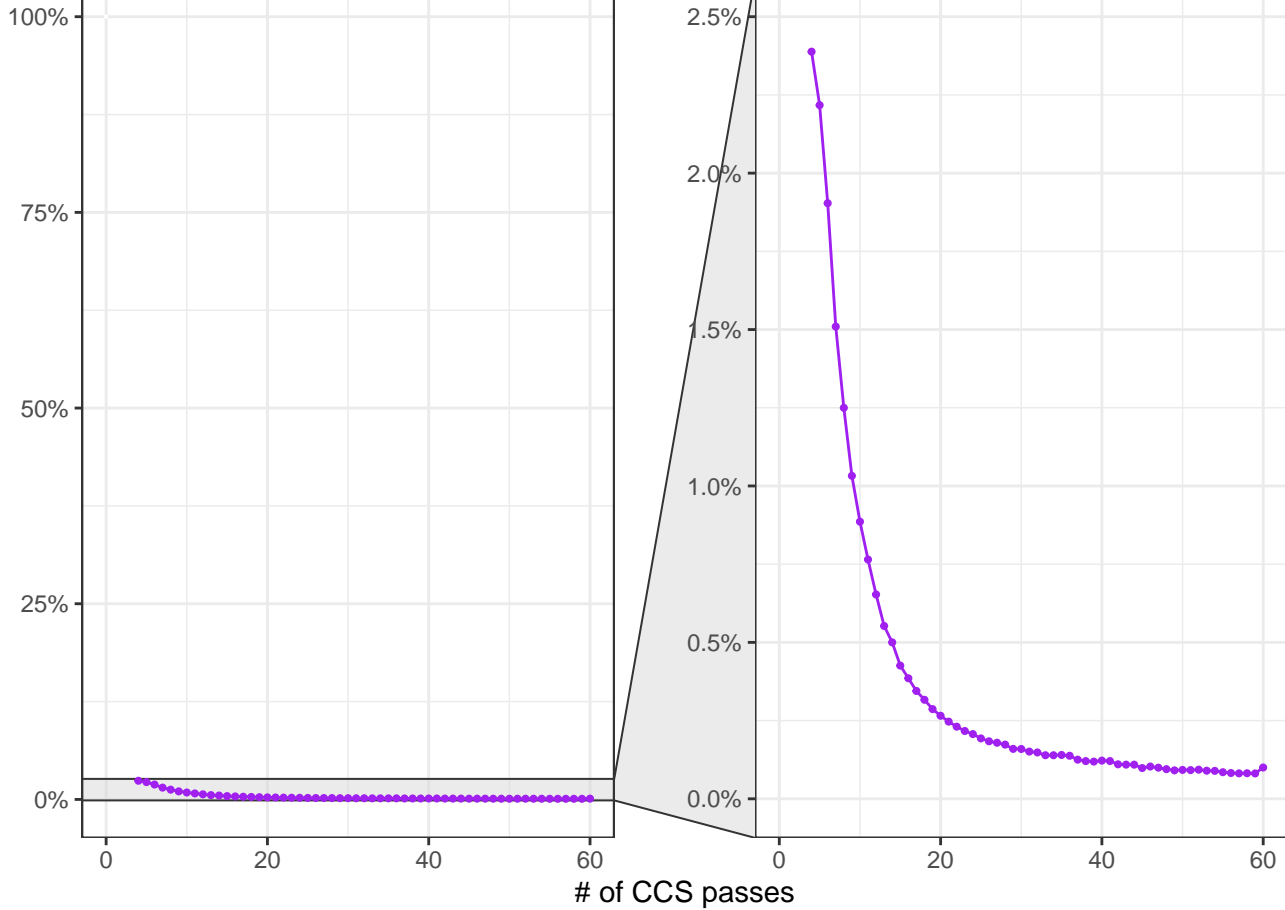

Supplement: Supplemental_Code.zip [file WGA-FPR-vs-passes.pdf › Fiber-m6A-figures-and-tables-0.0.1/Figures/WGA-FPR-vs-passes.pdf]

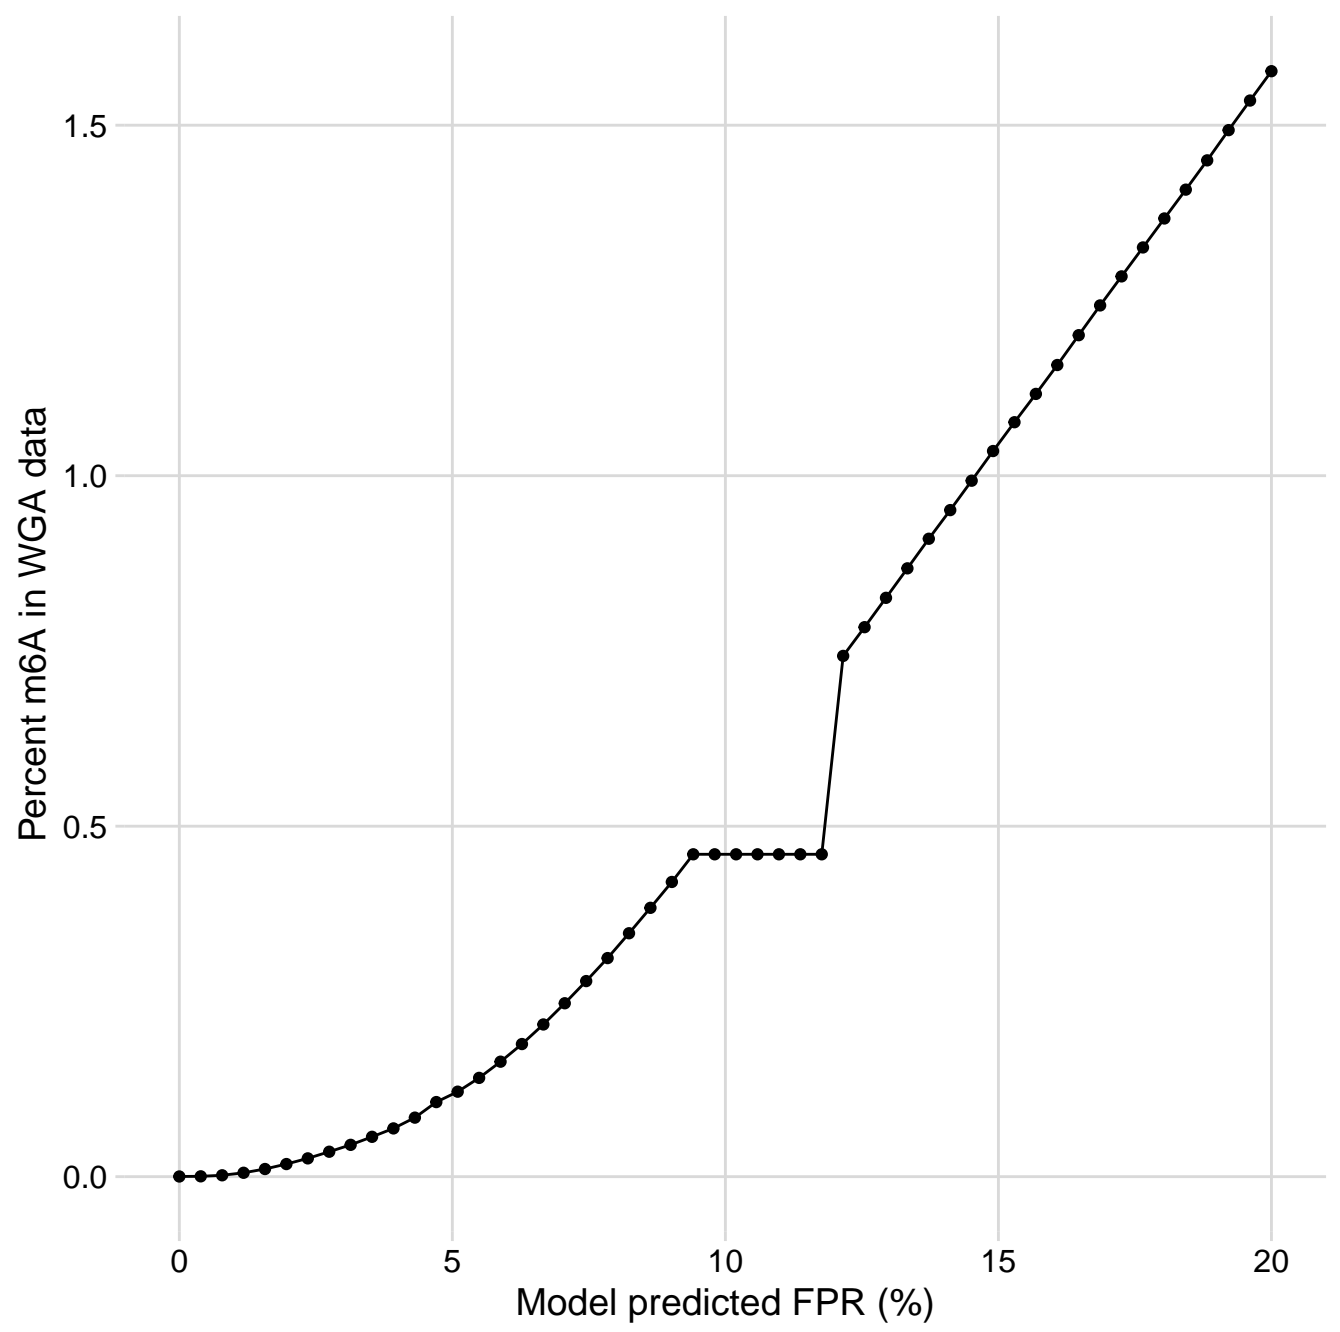

Supplement: Supplemental_Code.zip [file WGA-by-ML-tag-old-chem.pdf › Fiber-m6A-figures-and-tables-0.0.1/Figures/WGA-by-ML-tag-old-chem.pdf]

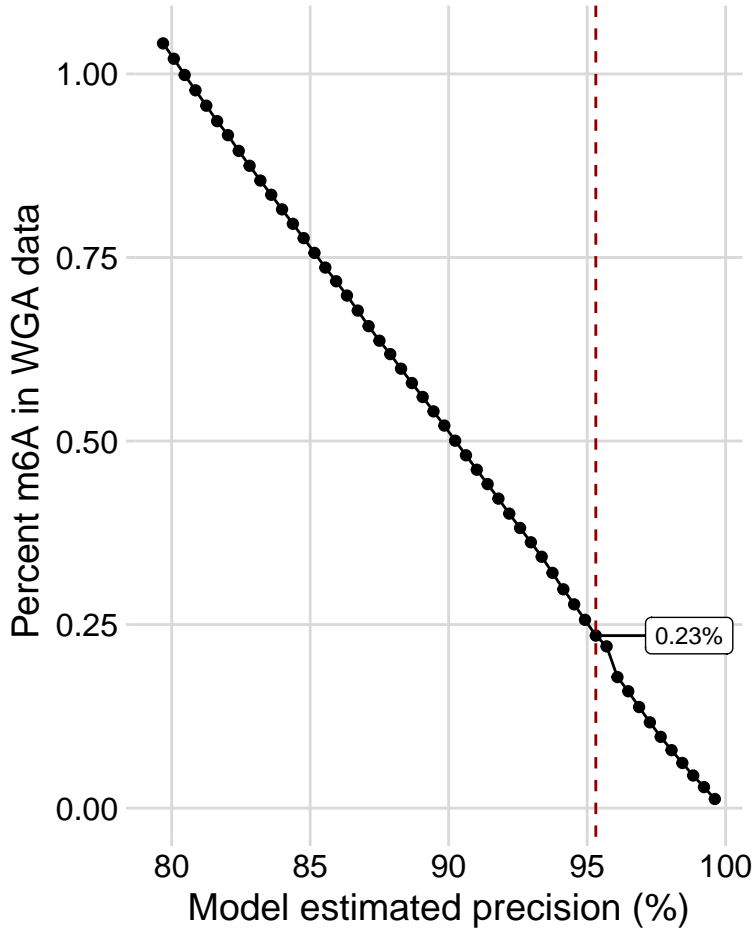

Supplement: Supplemental_Code.zip [file WGA-by-ML-tag.pdf › Fiber-m6A-figures-and-tables-0.0.1/Figures/WGA-by-ML-tag.pdf]

id EBV Genomic

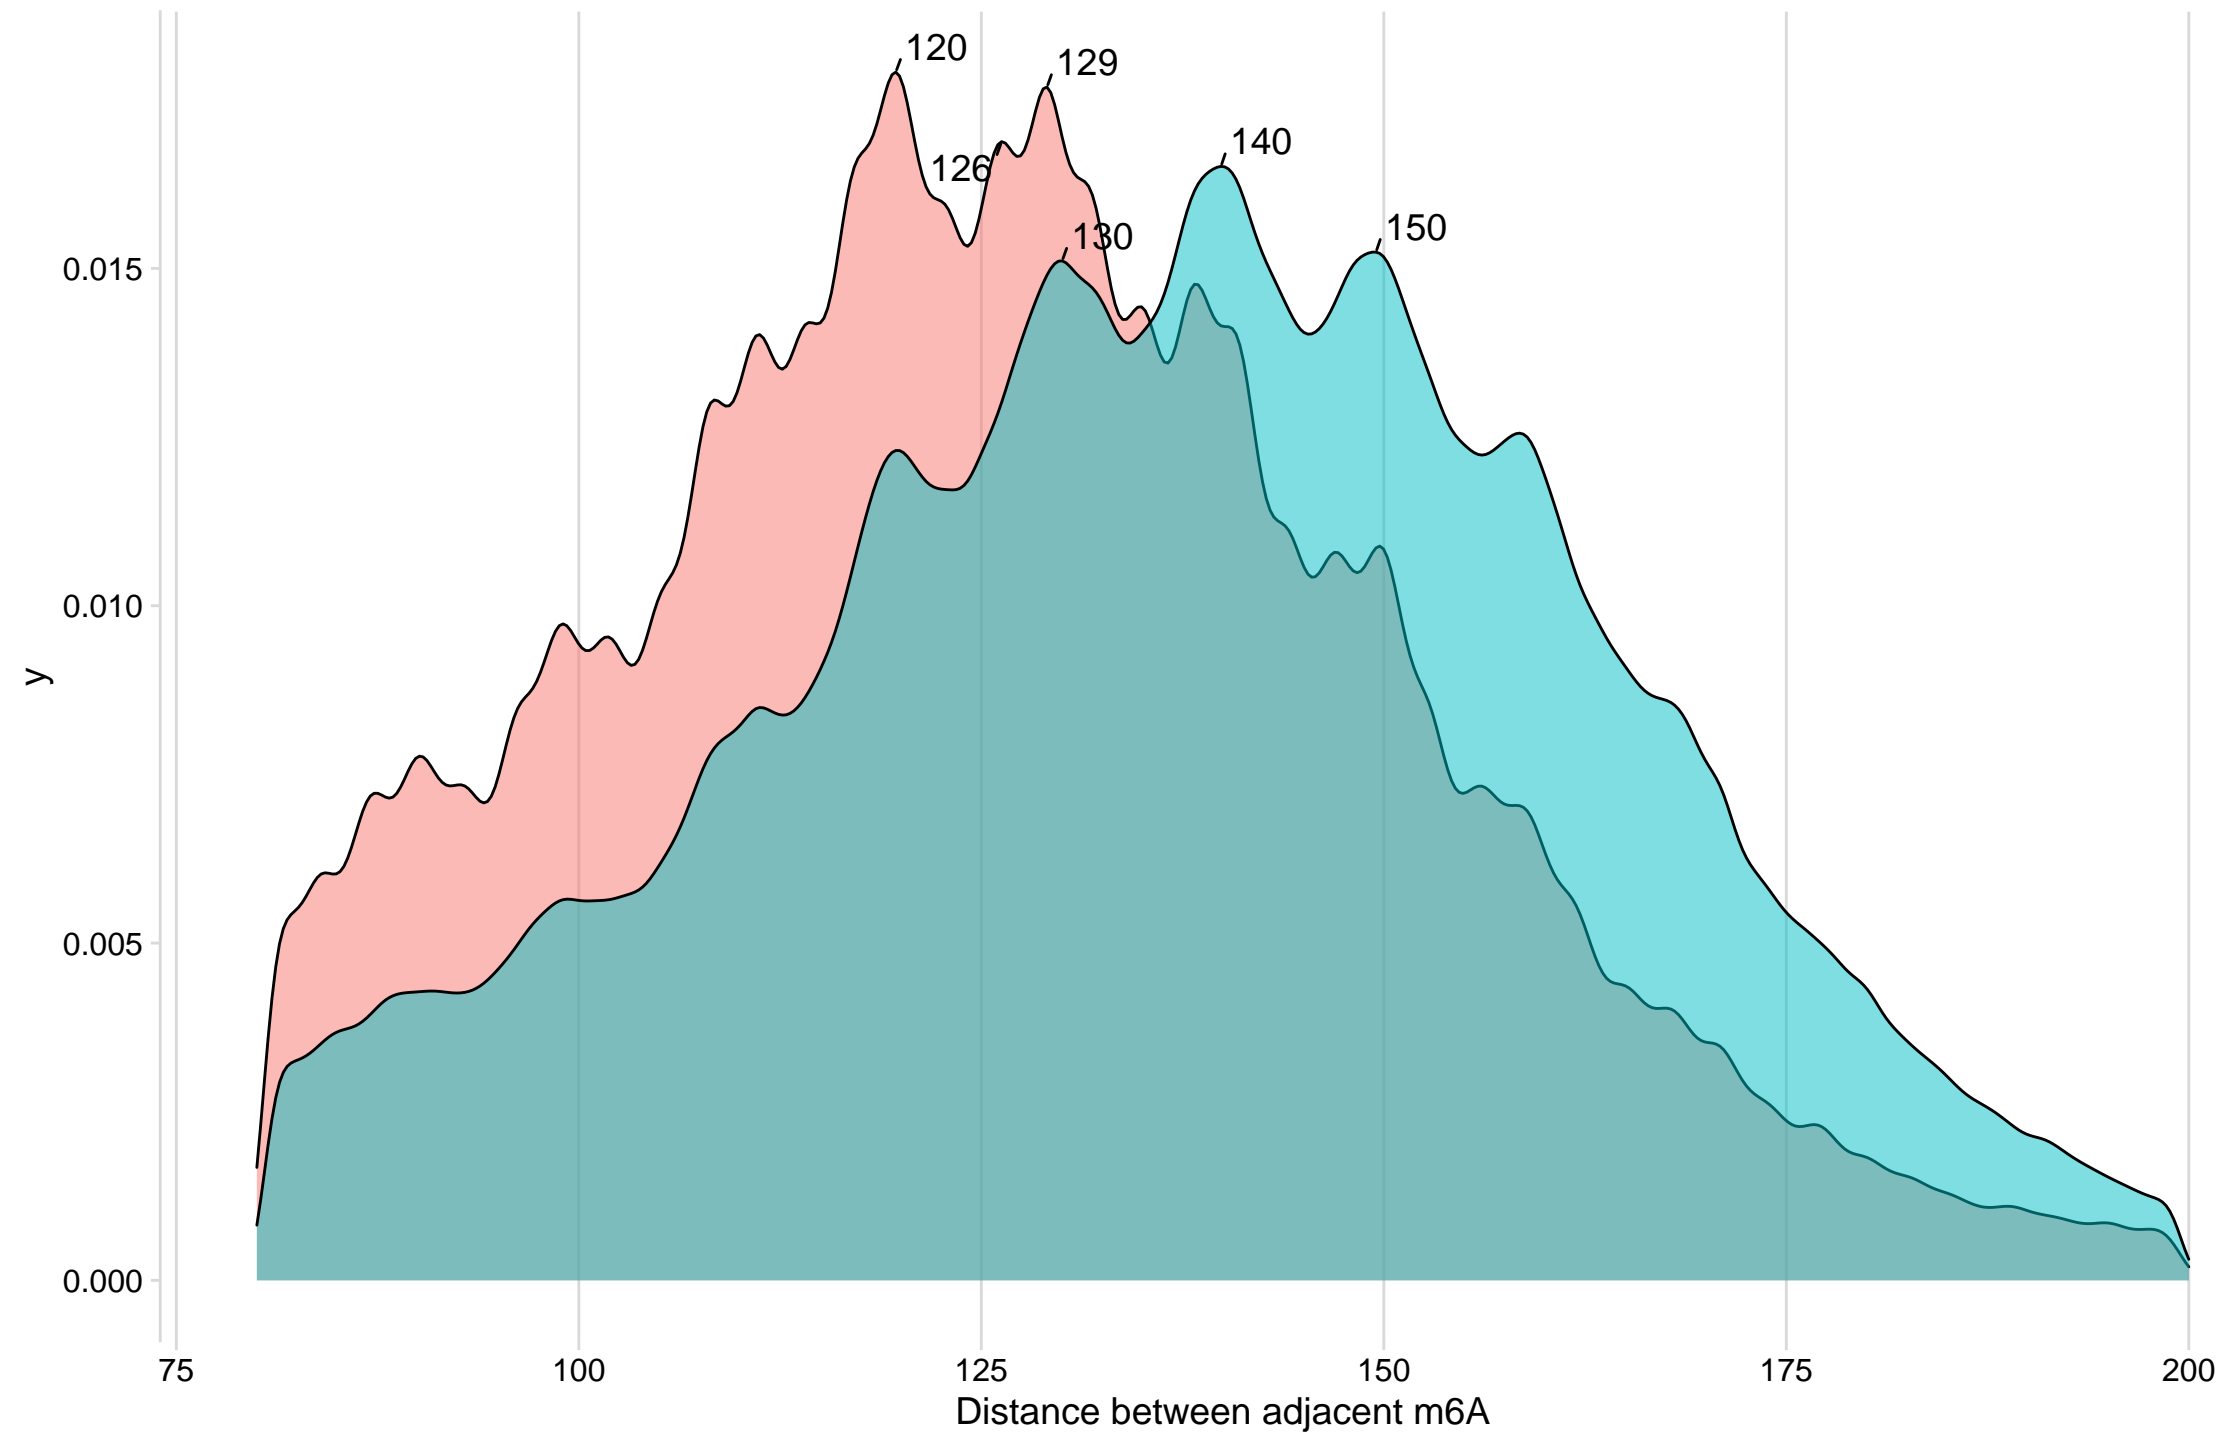

Supplement: Supplemental_Code.zip [file ebv_dist_m6a.pdf › Fiber-m6A-figures-and-tables-0.0.1/Figures/ebv_dist_m6a.pdf]

type m6A Nucleosome alpha 0.80 0.85 0.90 0.95 1.00 size 1.00 1.25 1.50 1.75 2.00

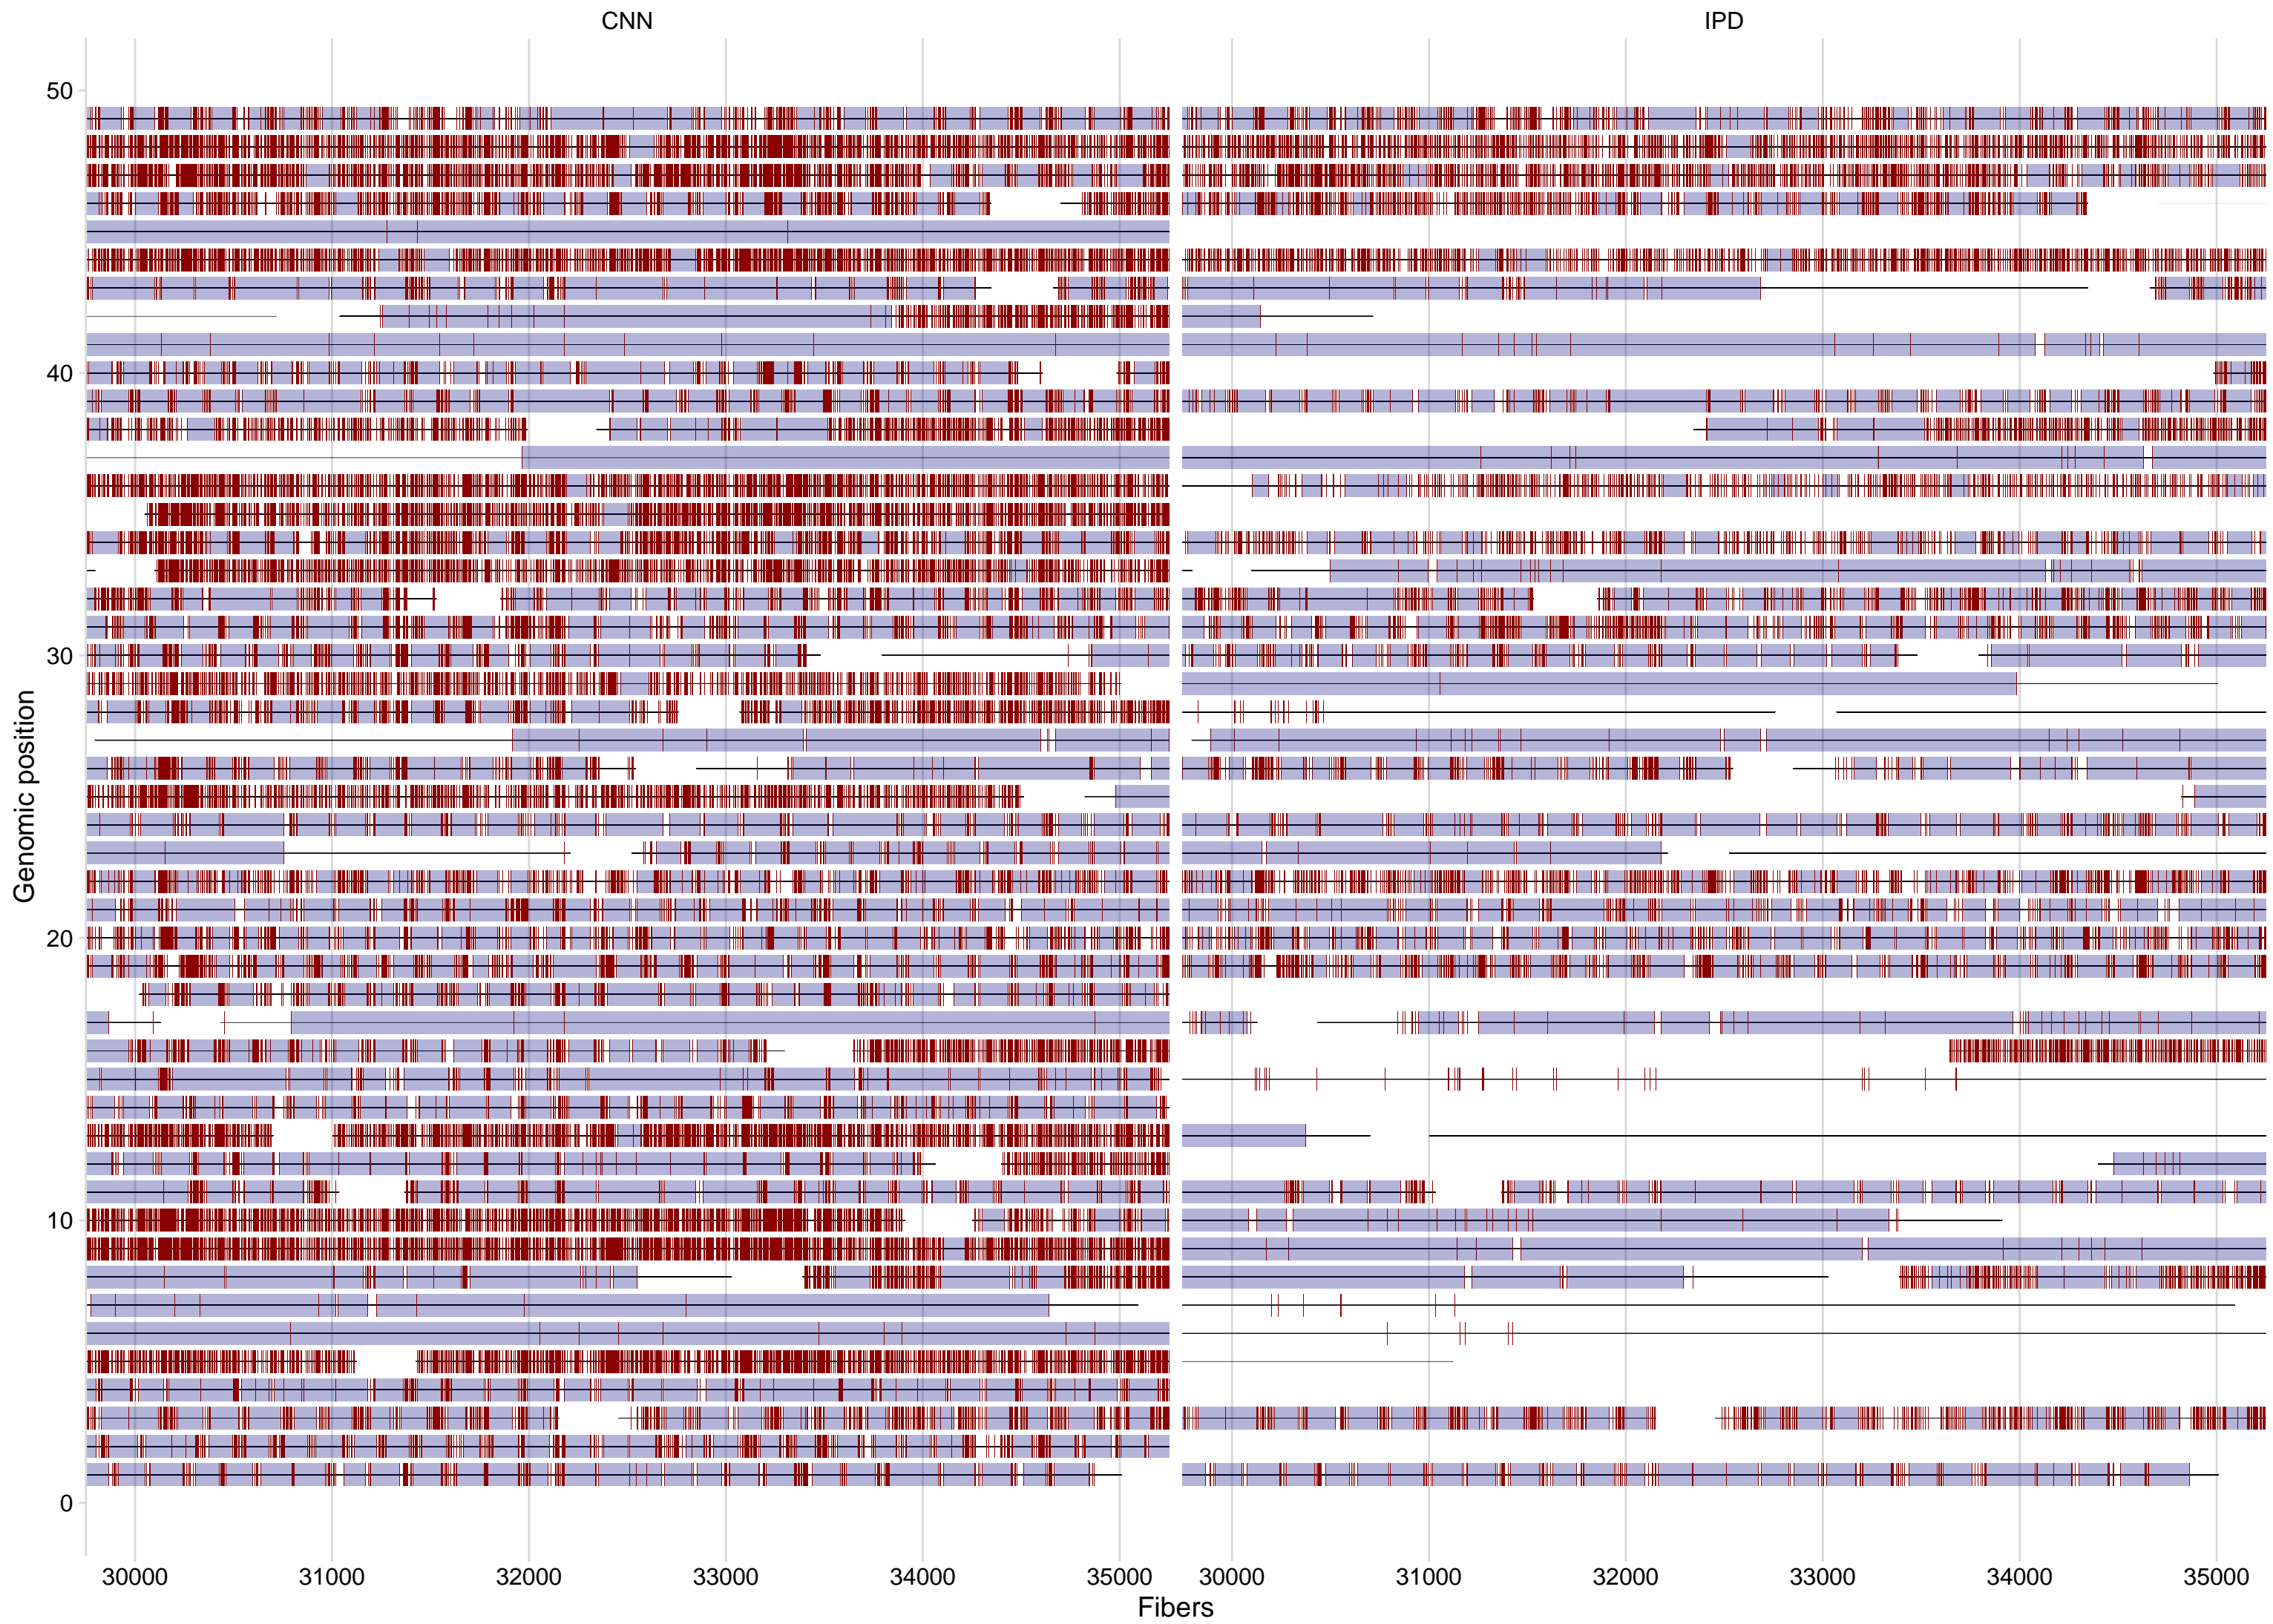

Supplement: Supplemental_Code.zip [file ebv_example_fibers.pdf › Fiber-m6A-figures-and-tables-0.0.1/Figures/ebv_example_fibers.pdf]

id EBV Genomic

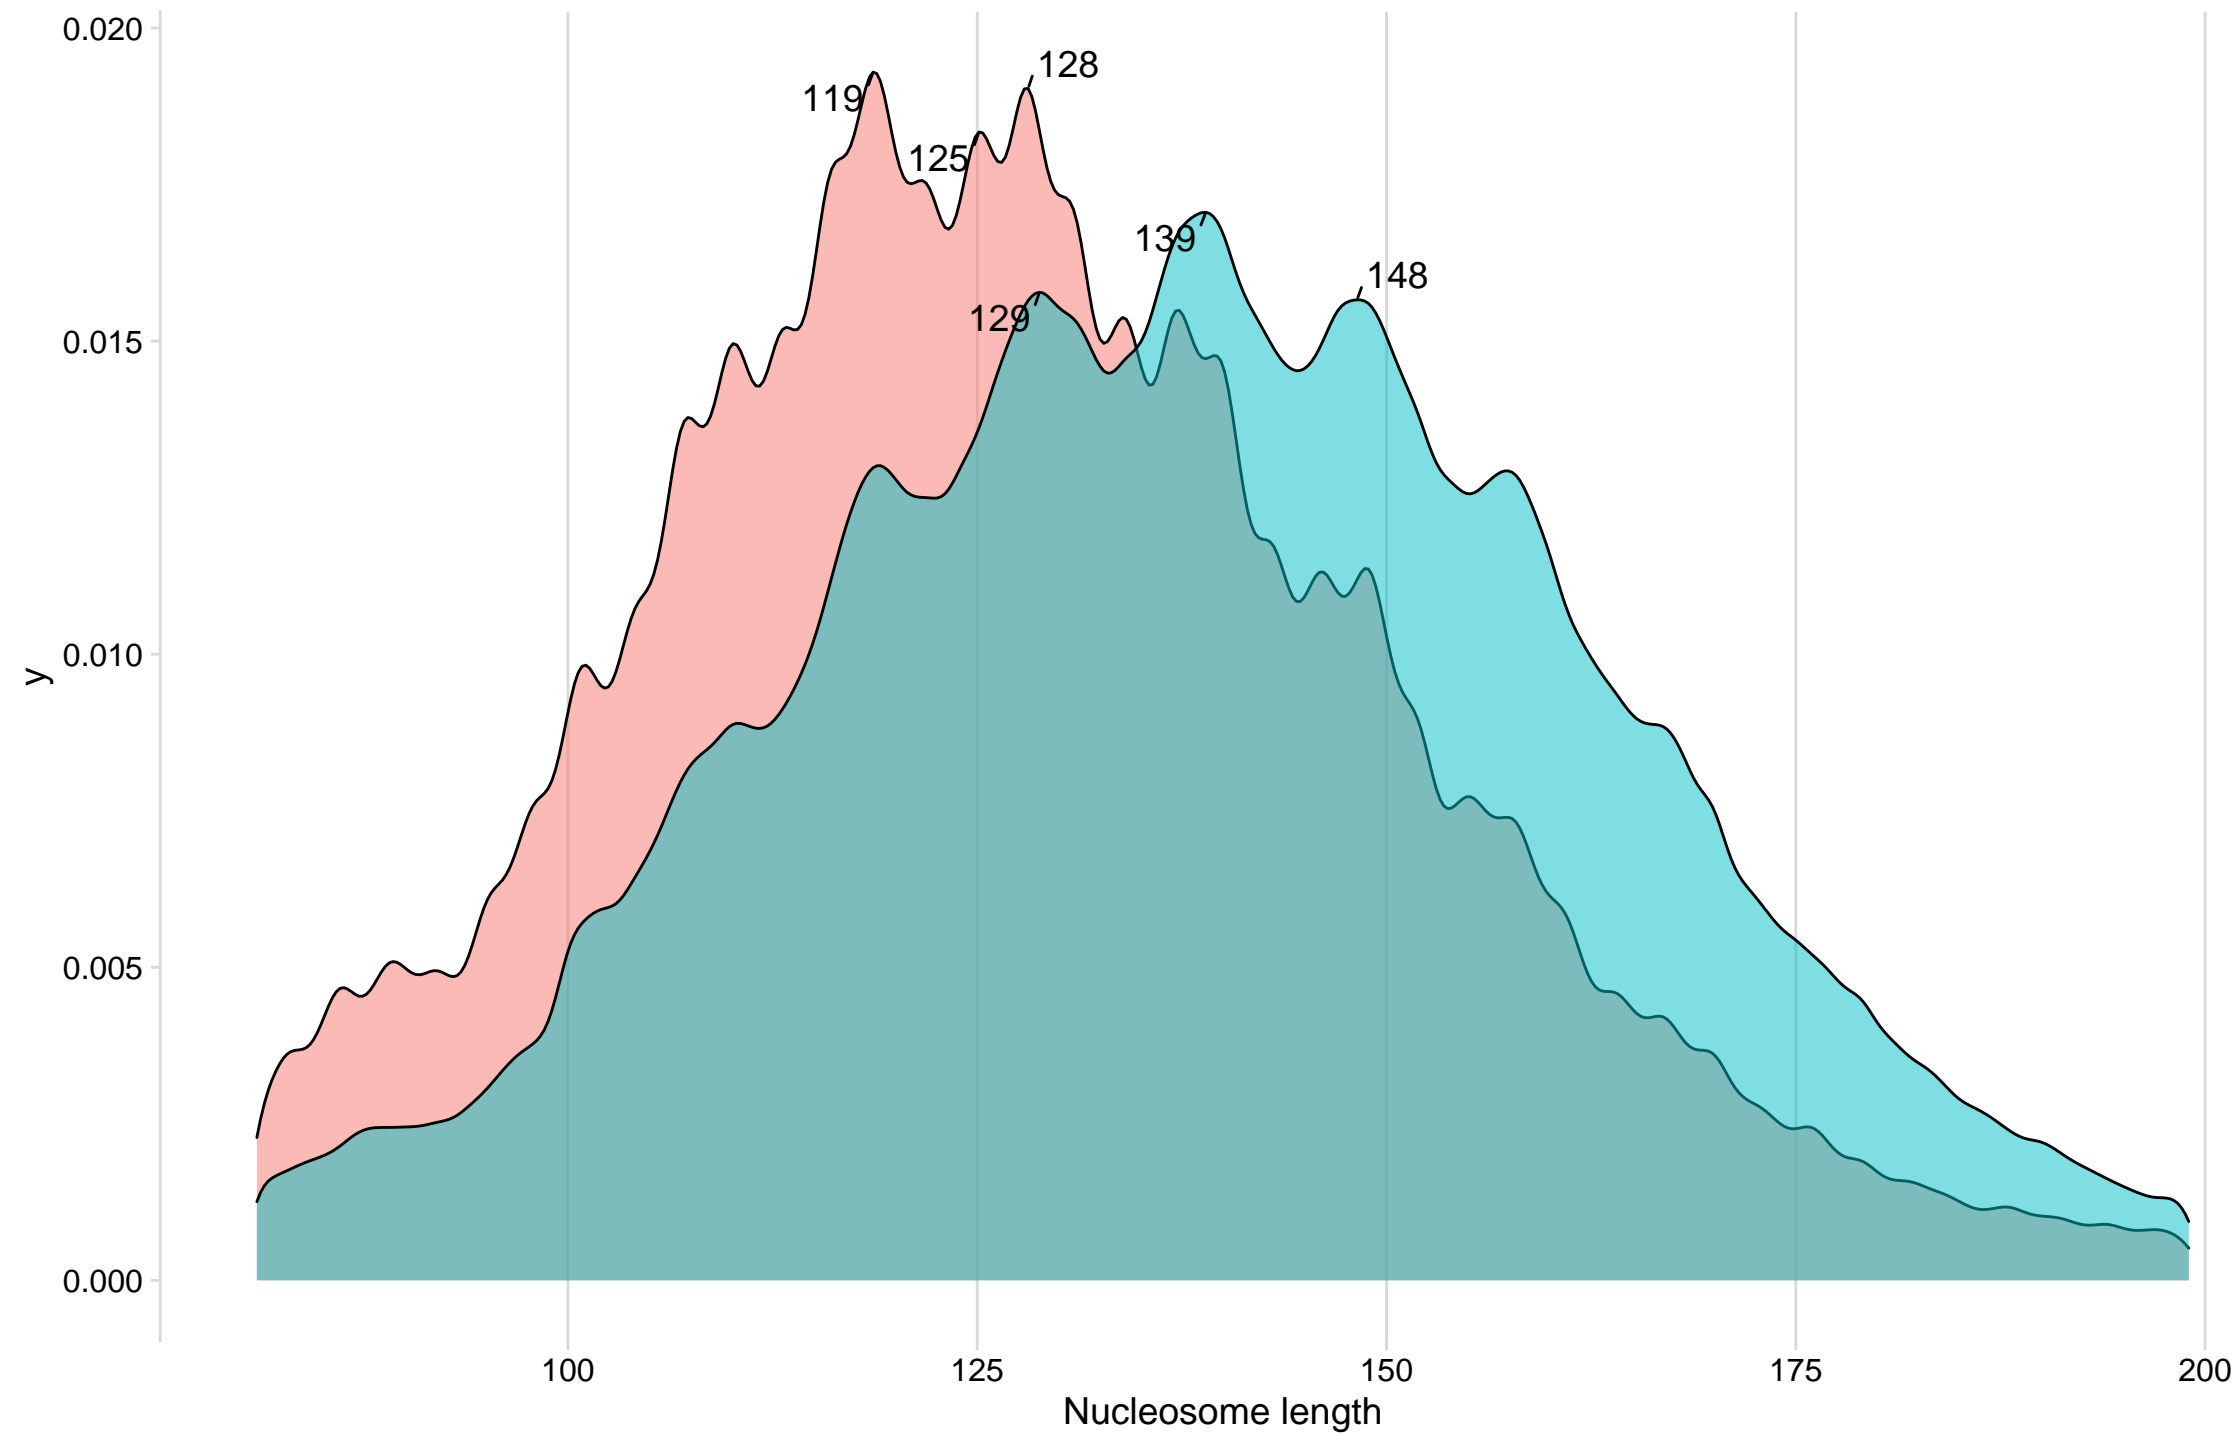

Supplement: Supplemental_Code.zip [file ebv_nuc_size.pdf › Fiber-m6A-figures-and-tables-0.0.1/Figures/ebv_nuc_size.pdf]

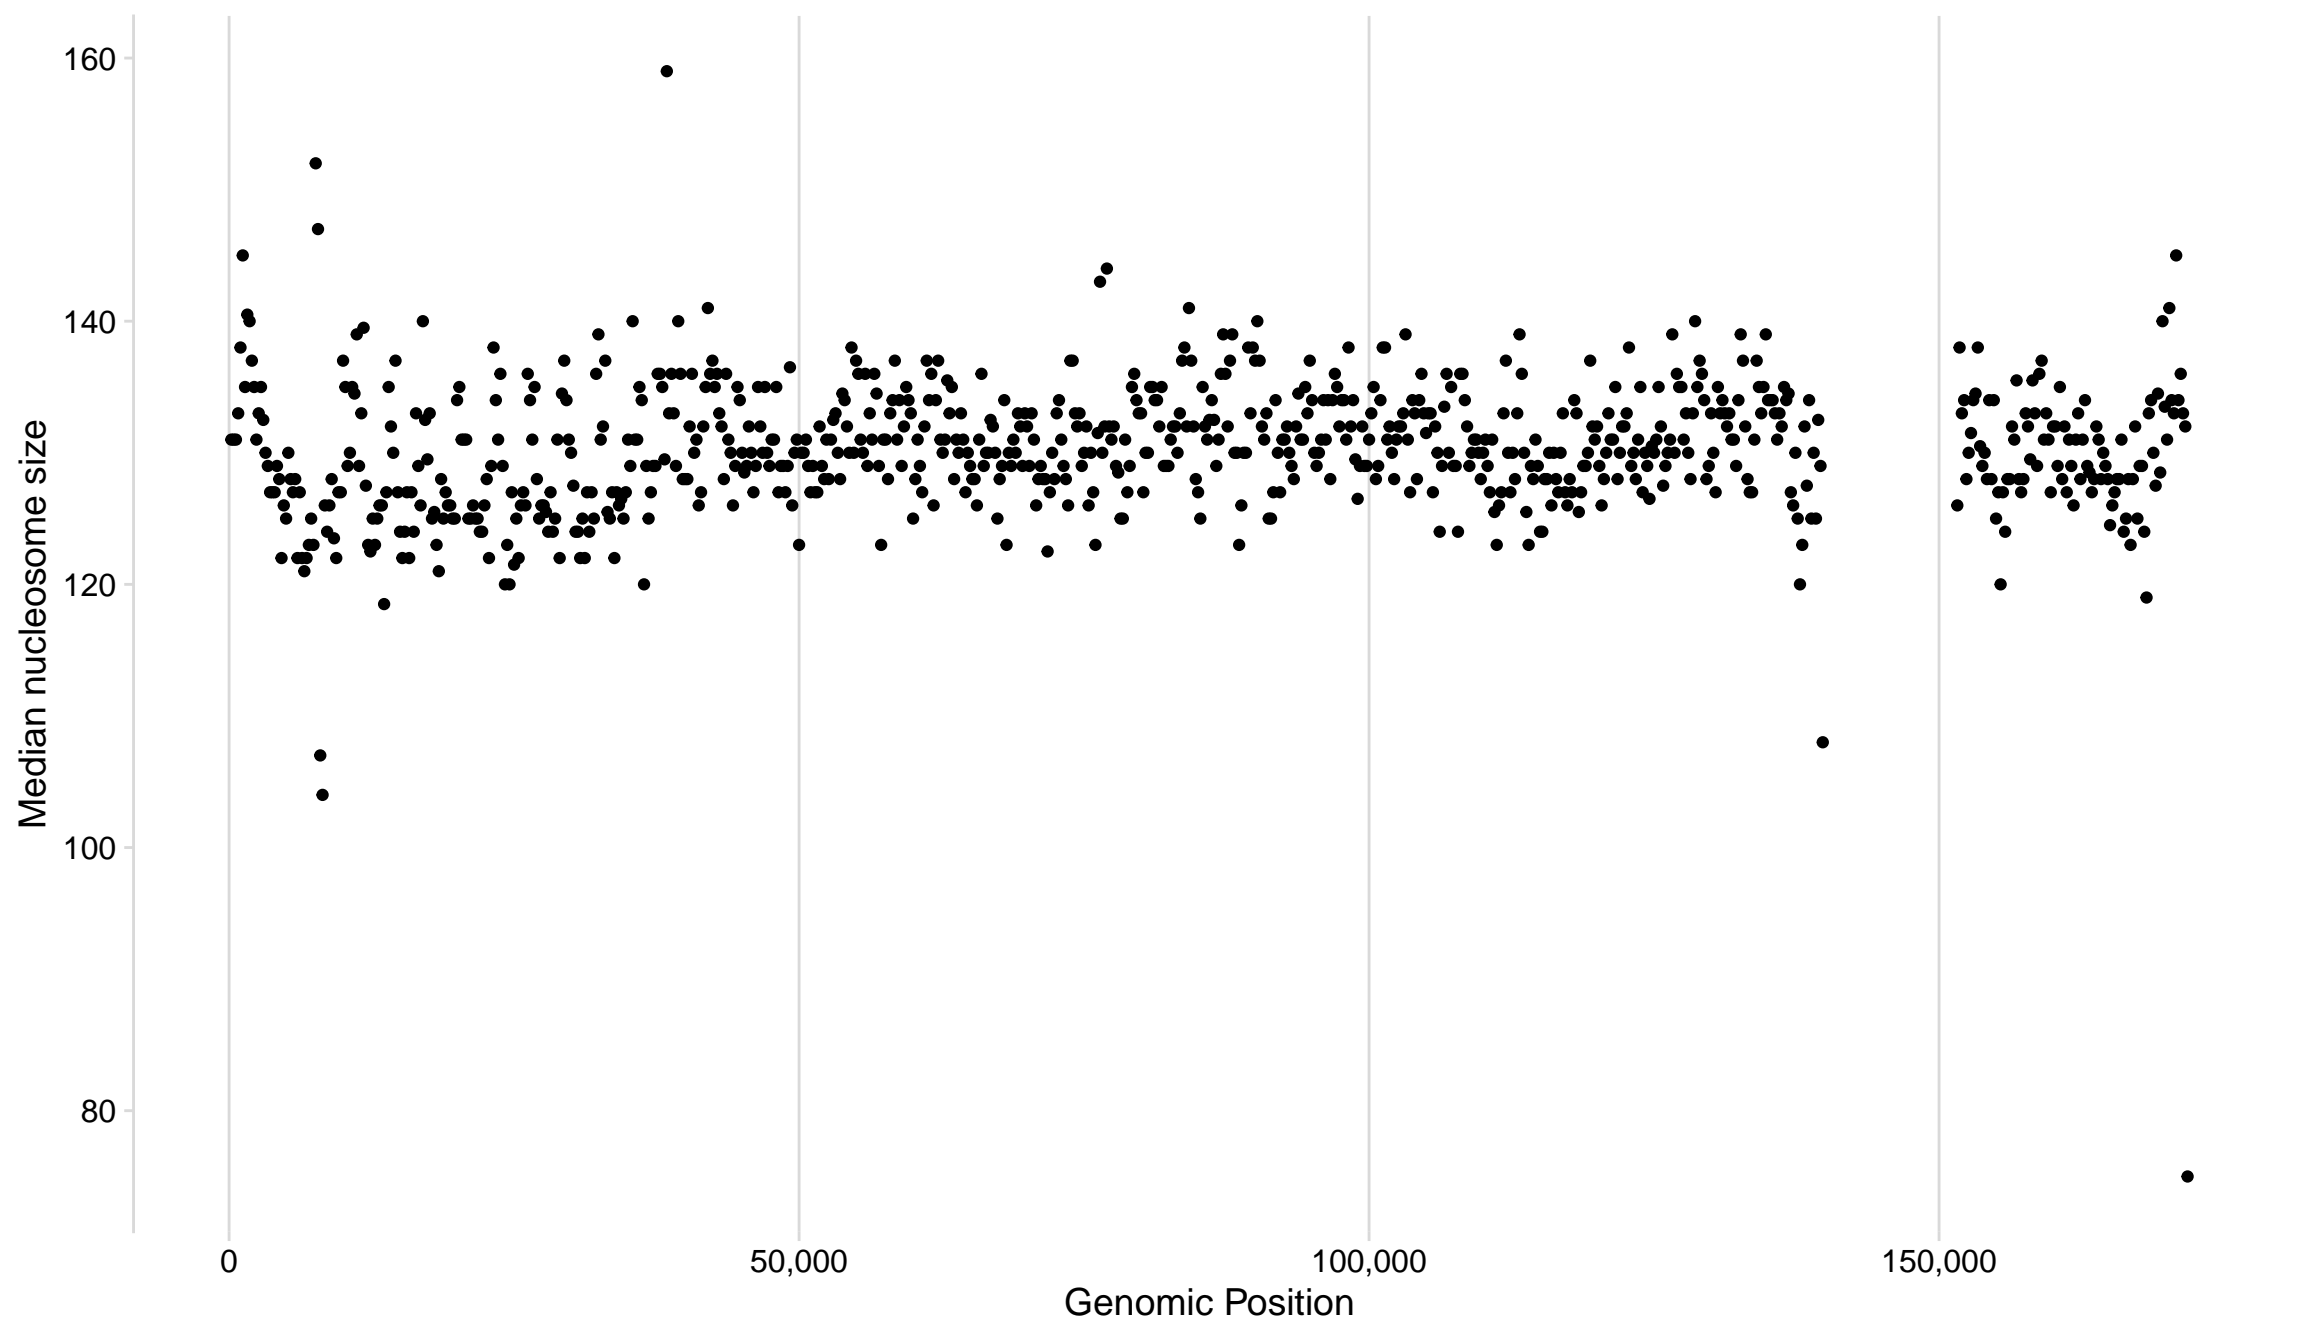

Supplement: Supplemental_Code.zip [file ebv_nuc_size_by_position.pdf › Fiber-m6A-figures-and-tables-0.0.1/Figures/ebv_nuc_size_by_position.pdf]

ipdSummary m6A label ■ FALSE ■ TRUE

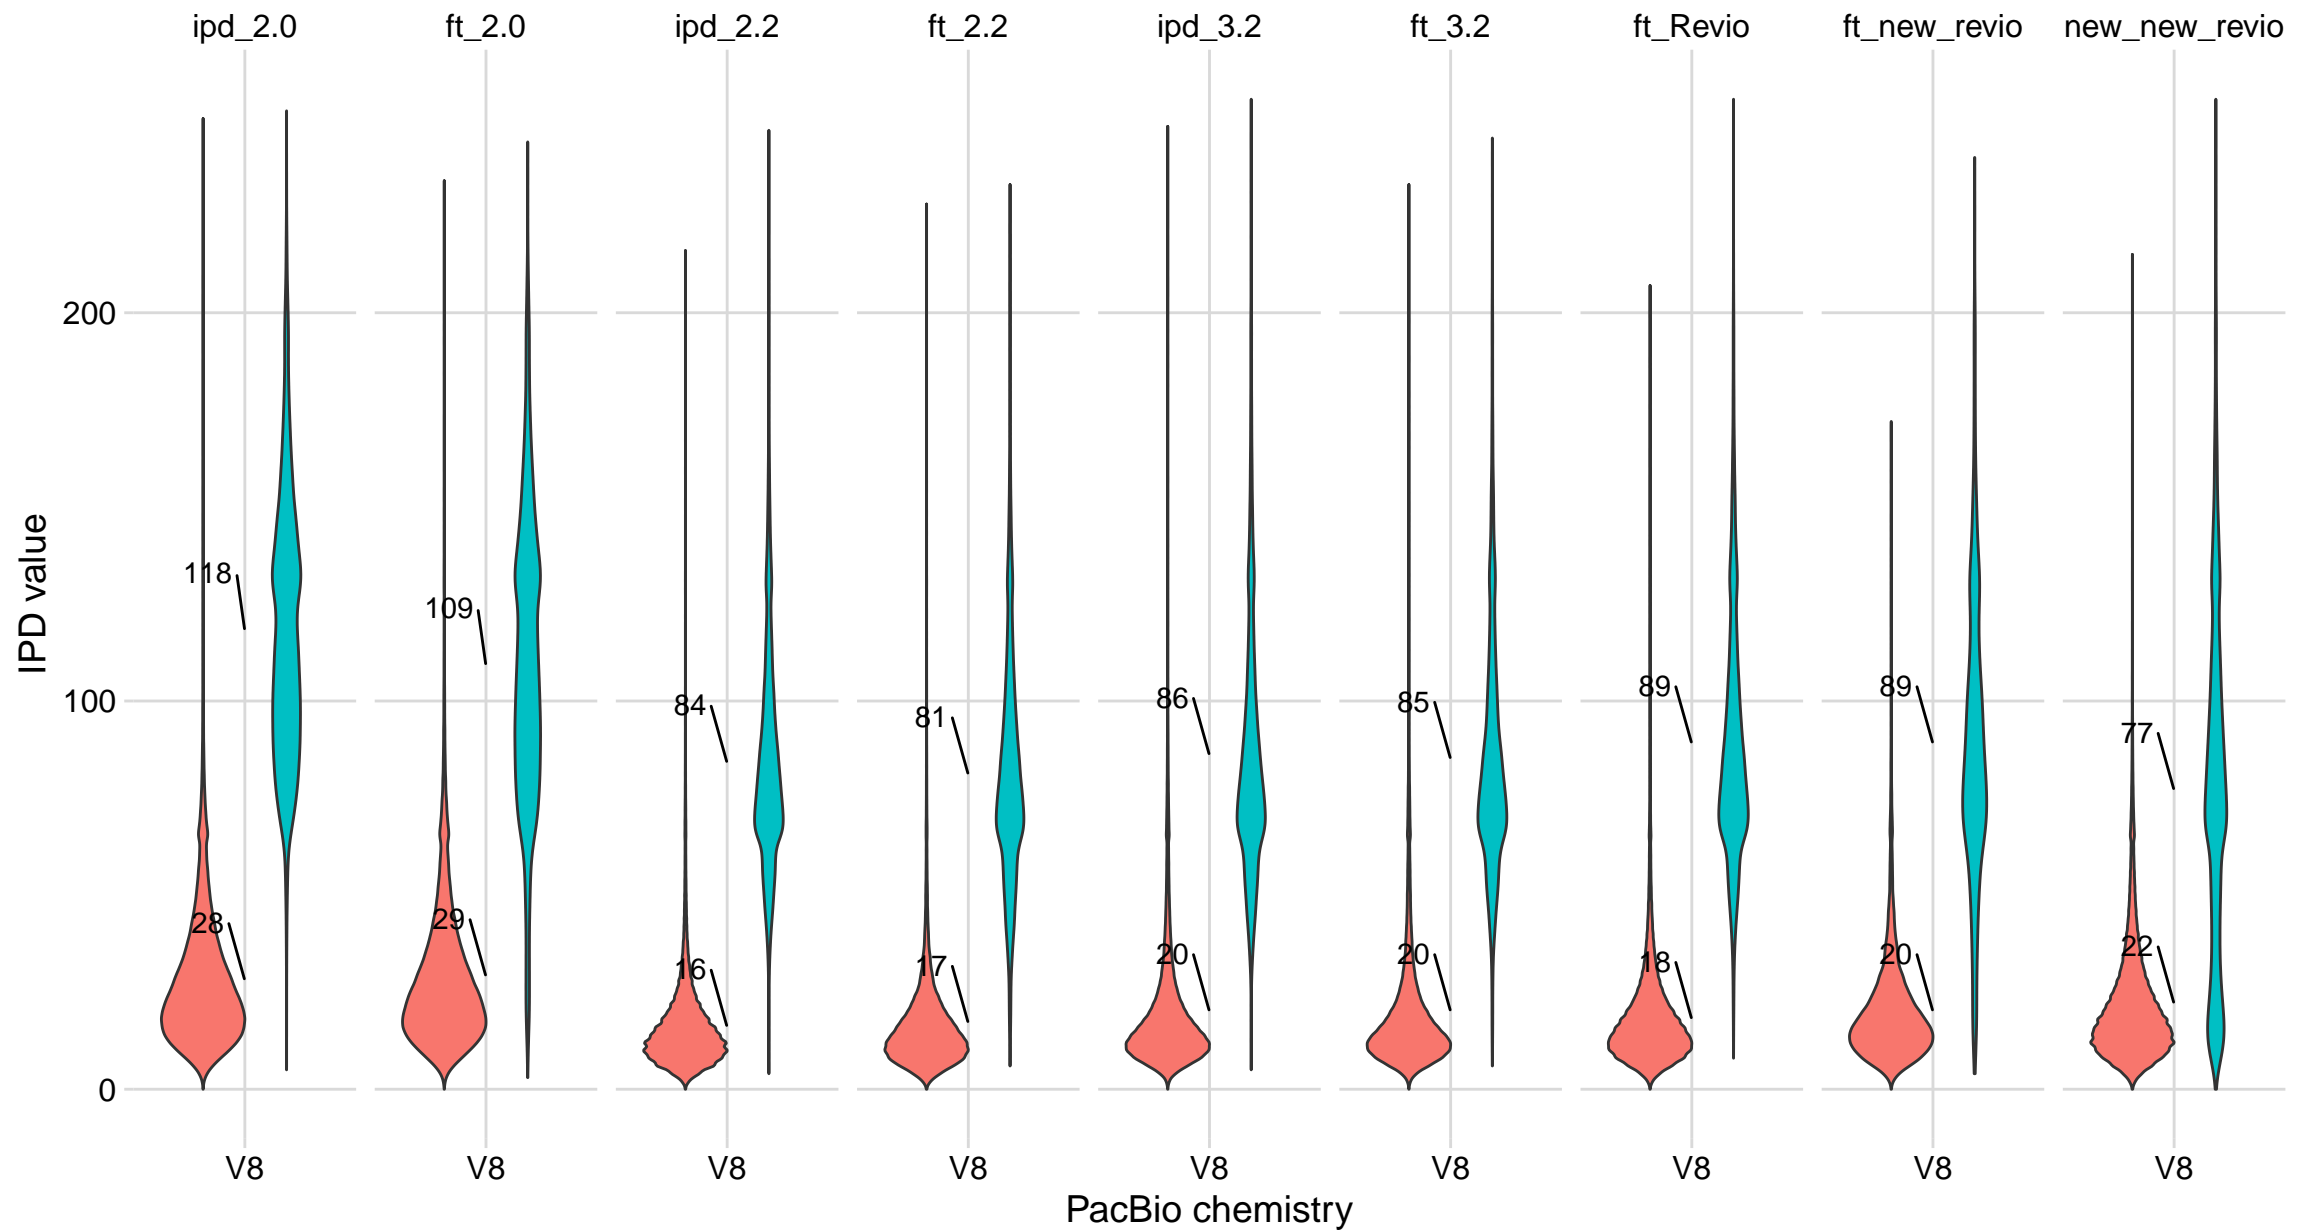

Supplement: Supplemental_Code.zip [file ipd_values.pdf › Fiber-m6A-figures-and-tables-0.0.1/Figures/ipd_values.pdf]

ipdSummary m6A label a FALSE a TRUE

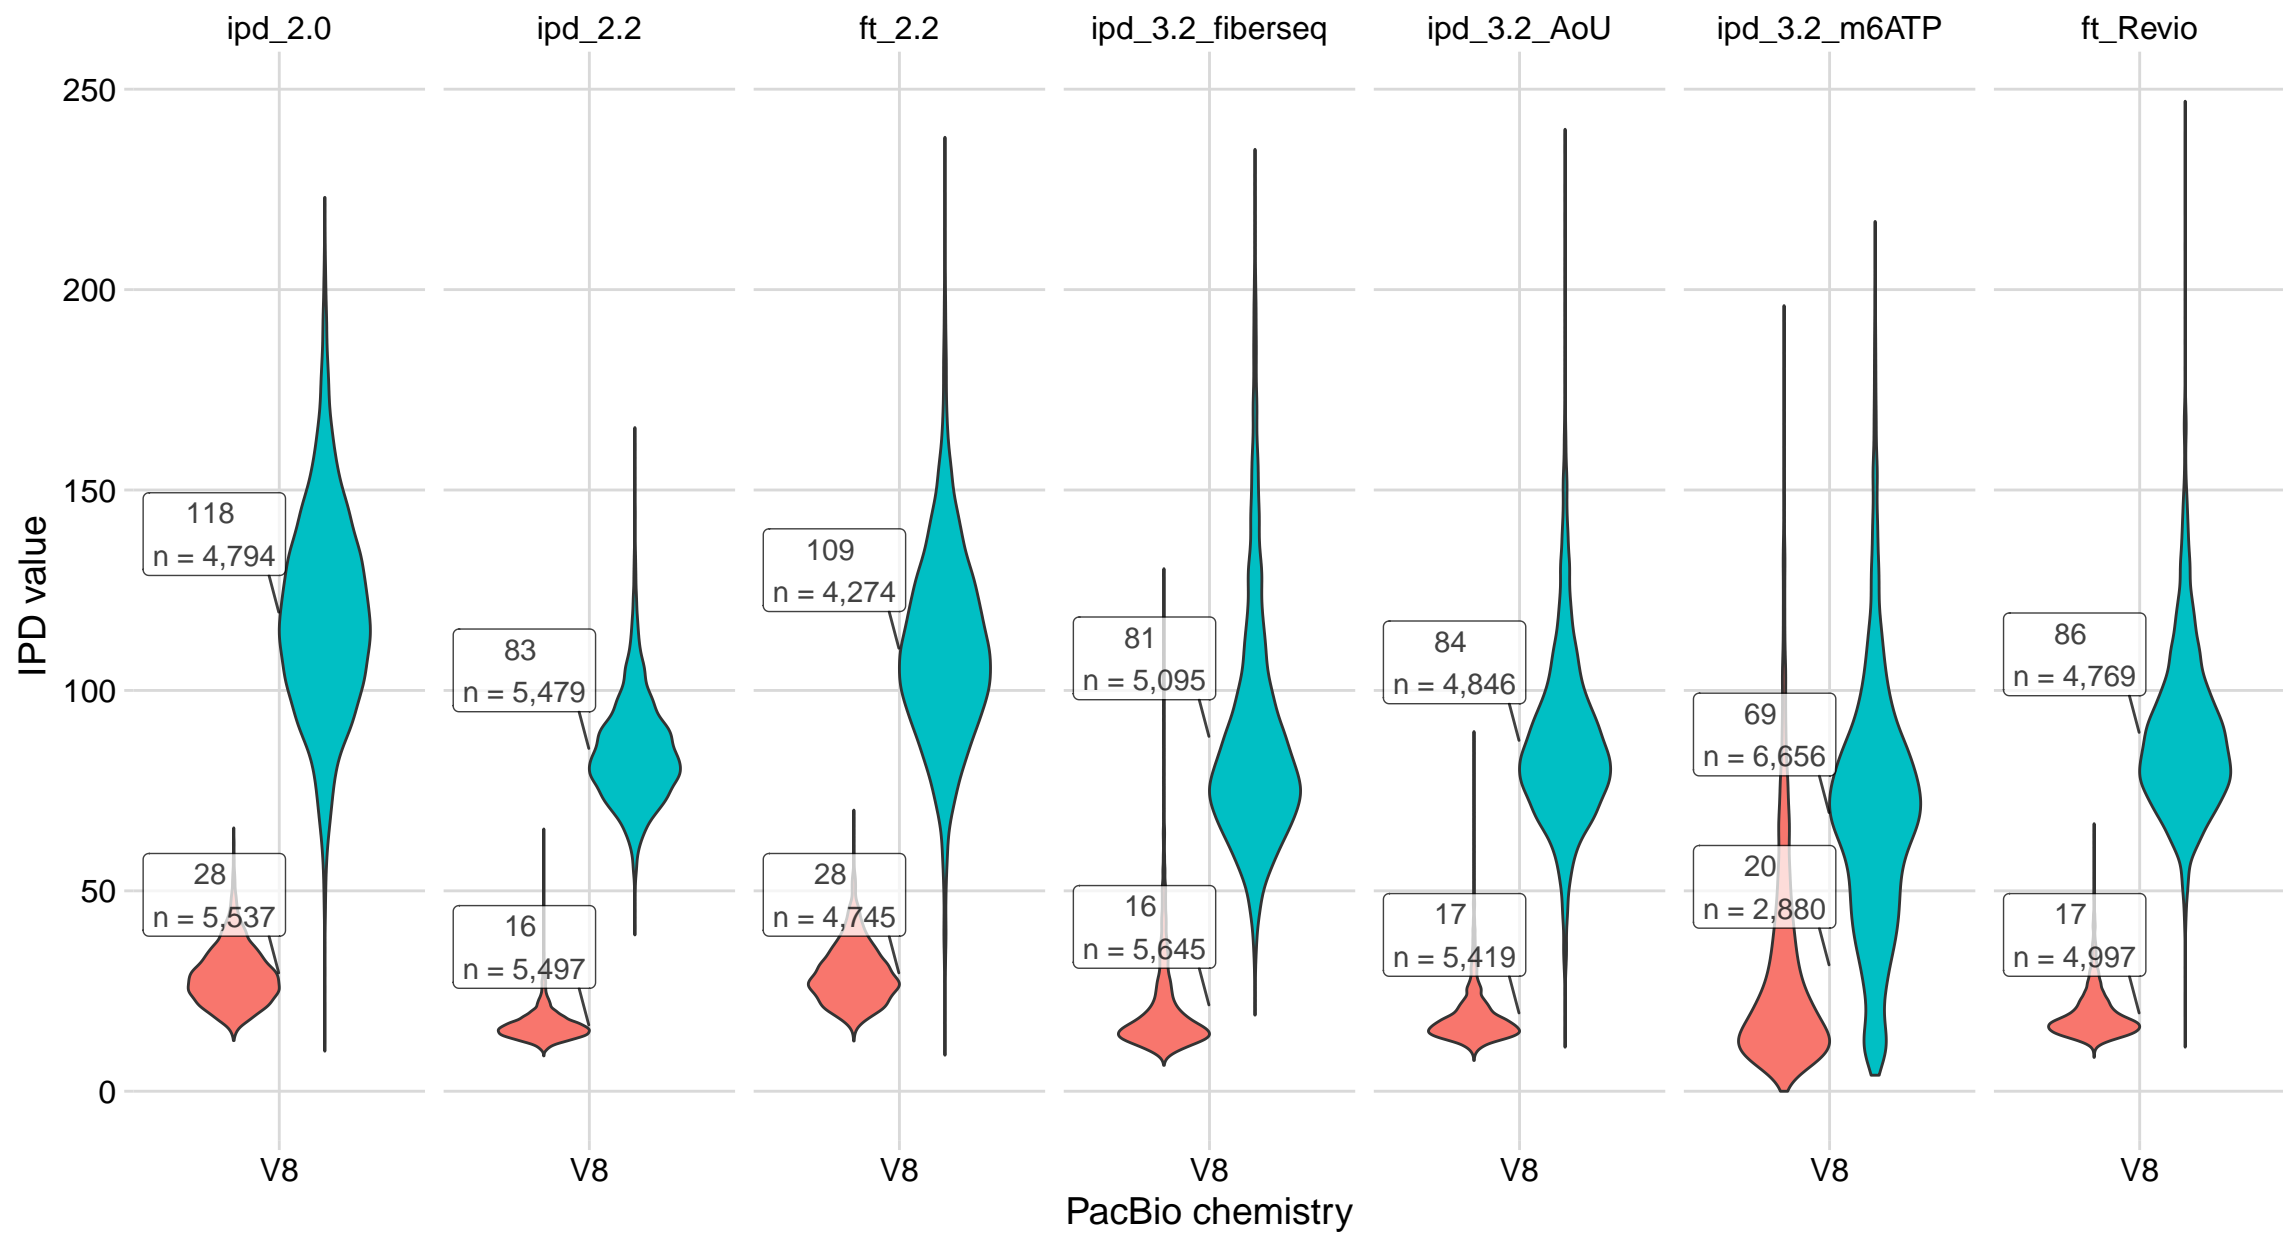

Supplement: Supplemental_Code.zip [file ipd_values_by_reads.pdf › Fiber-m6A-figures-and-tables-0.0.1/Figures/ipd_values_by_reads.pdf]

PS00243

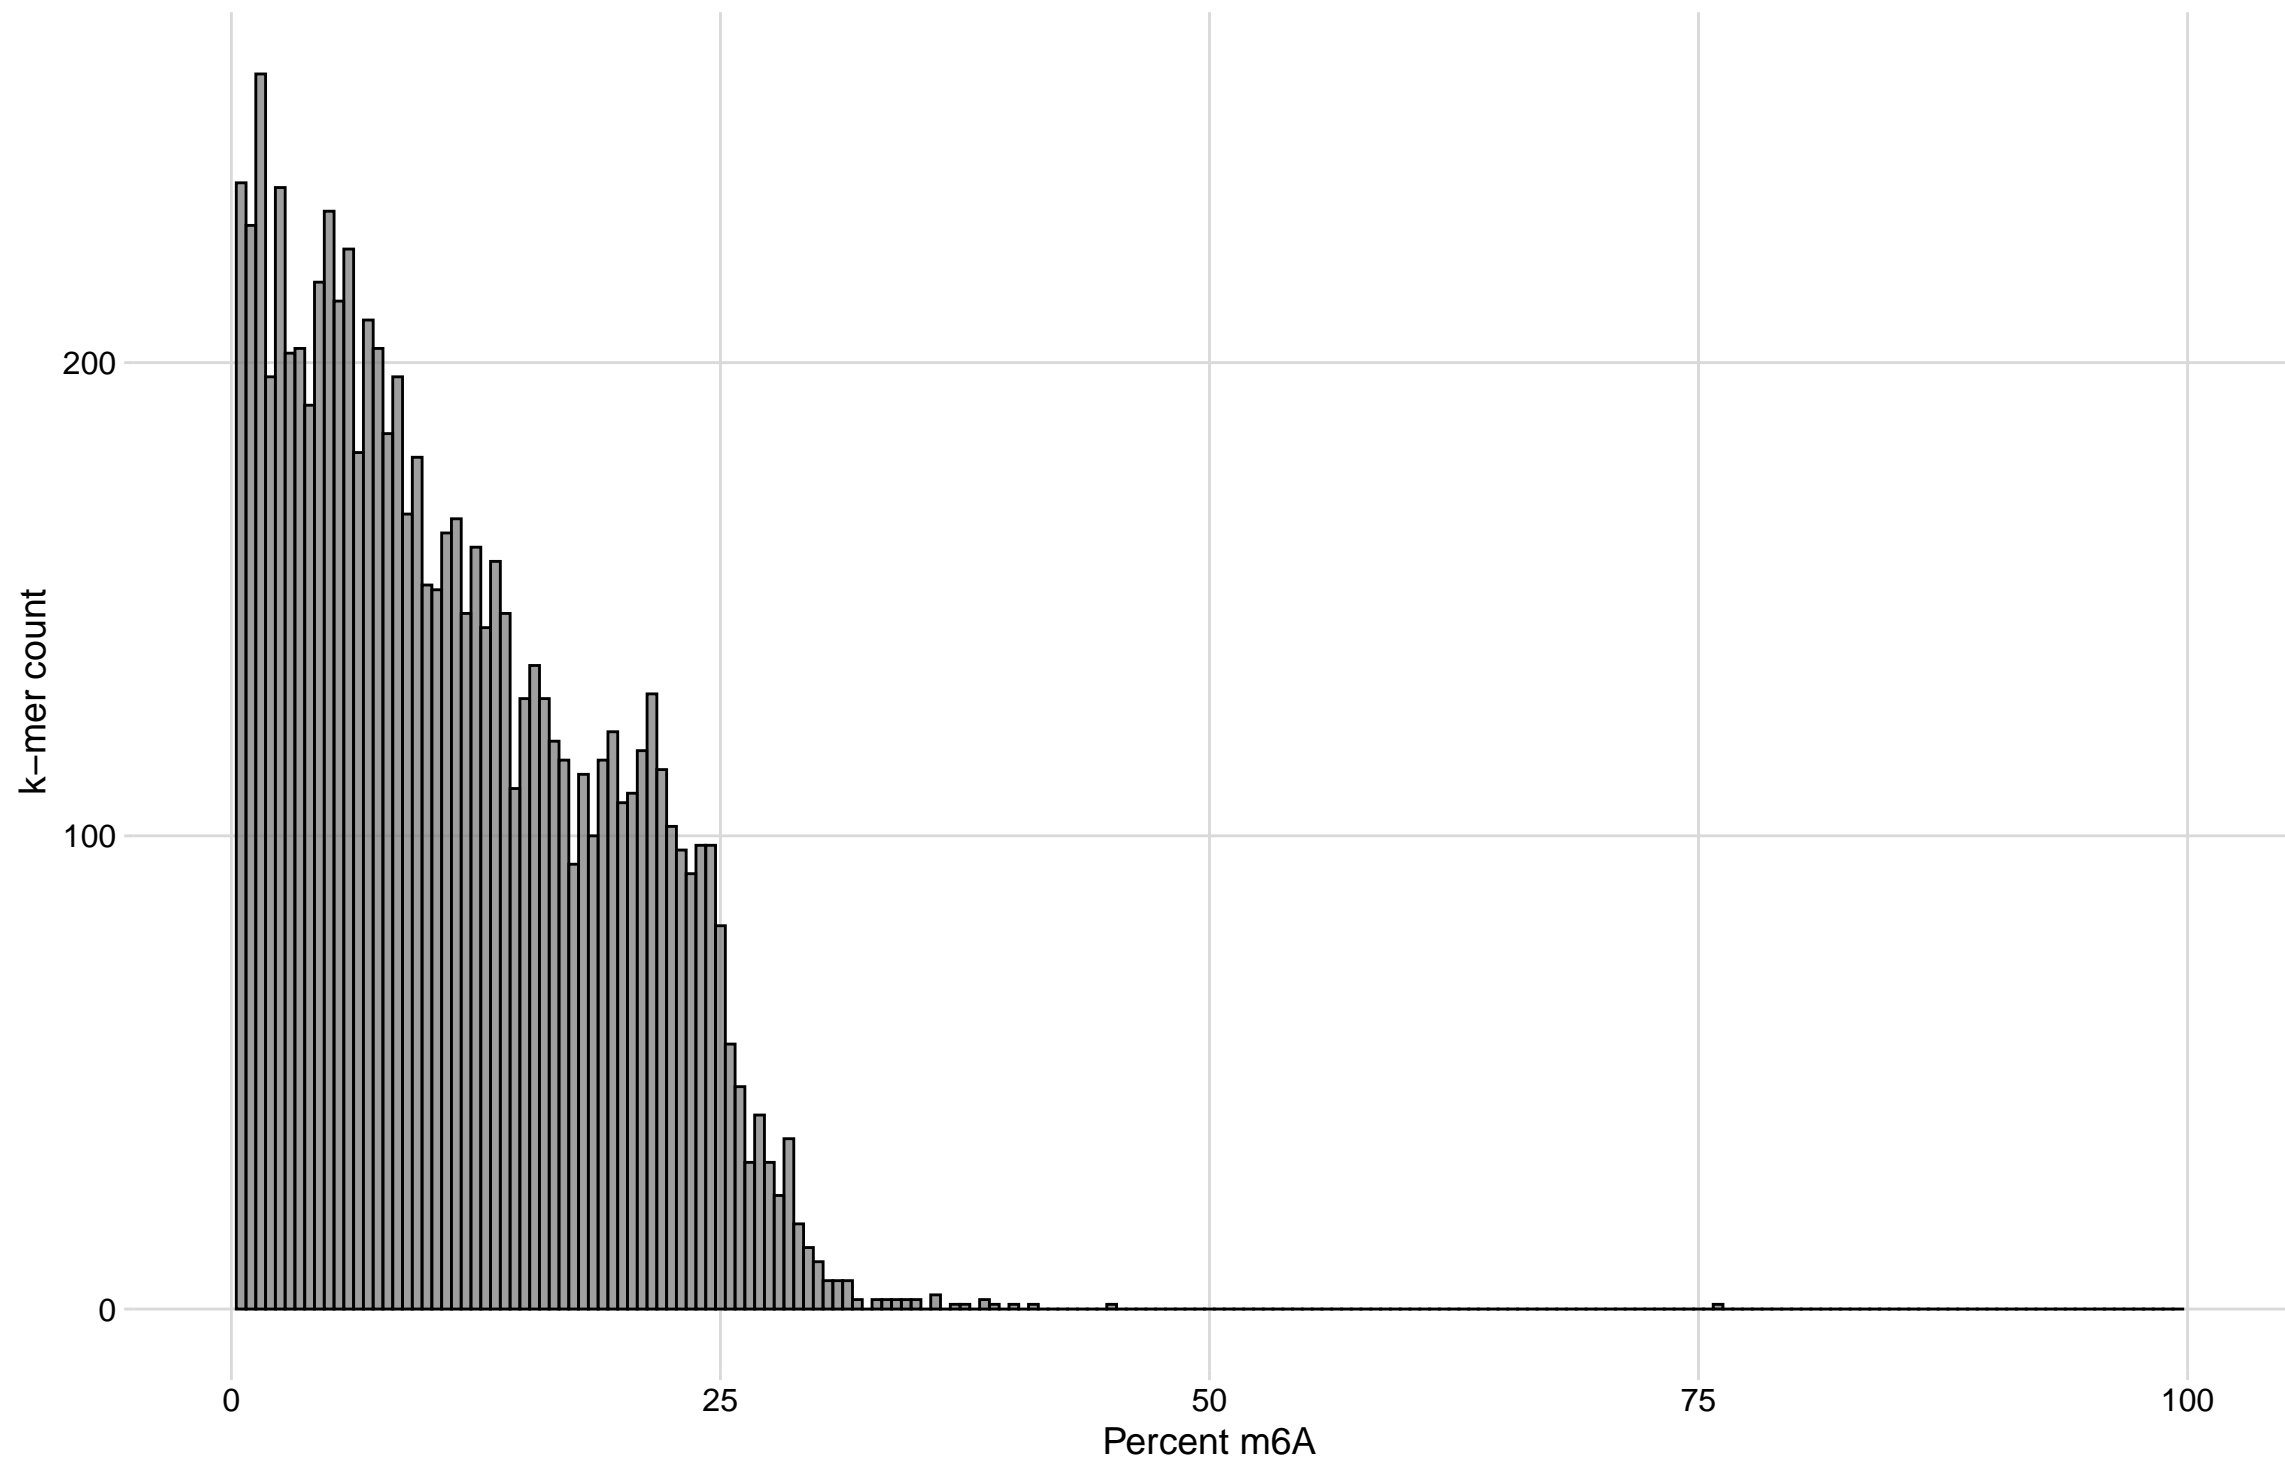

Supplement: Supplemental_Code.zip [file kmer.pdf › Fiber-m6A-figures-and-tables-0.0.1/Figures/kmer.pdf]

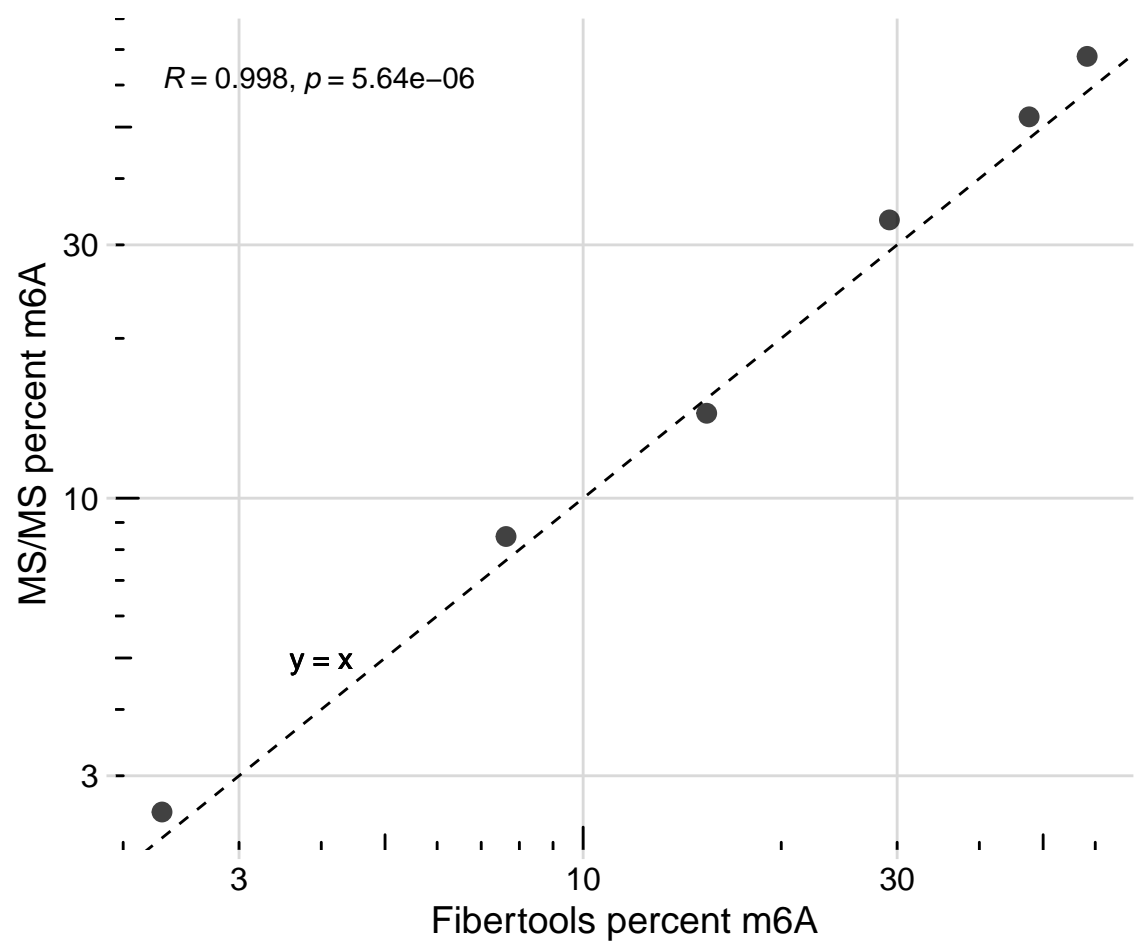

Supplement: Supplemental_Code.zip [file m6a-percent-v2.pdf › Fiber-m6A-figures-and-tables-0.0.1/Figures/m6a-percent-v2.pdf]

● Subread model    ● Semi-supervised CNN    ● Mass spectrometry

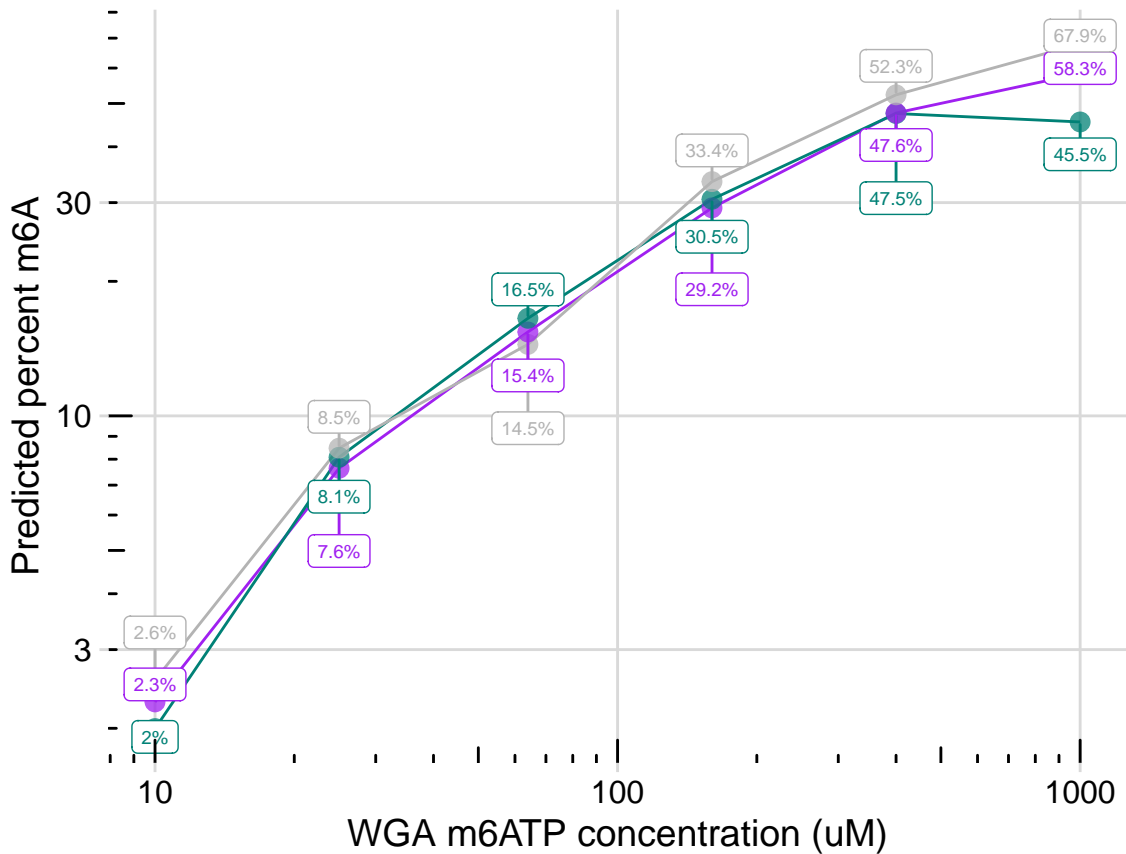

Supplement: Supplemental_Code.zip [file m6a-percent.pdf › Fiber-m6A-figures-and-tables-0.0.1/Figures/m6a-percent.pdf]

● Dam (Gm6ATC) ● EcoR (GAm6ATTC) ● TaqI (TCGm6A)

Fold enrichment of m6A at the target motif

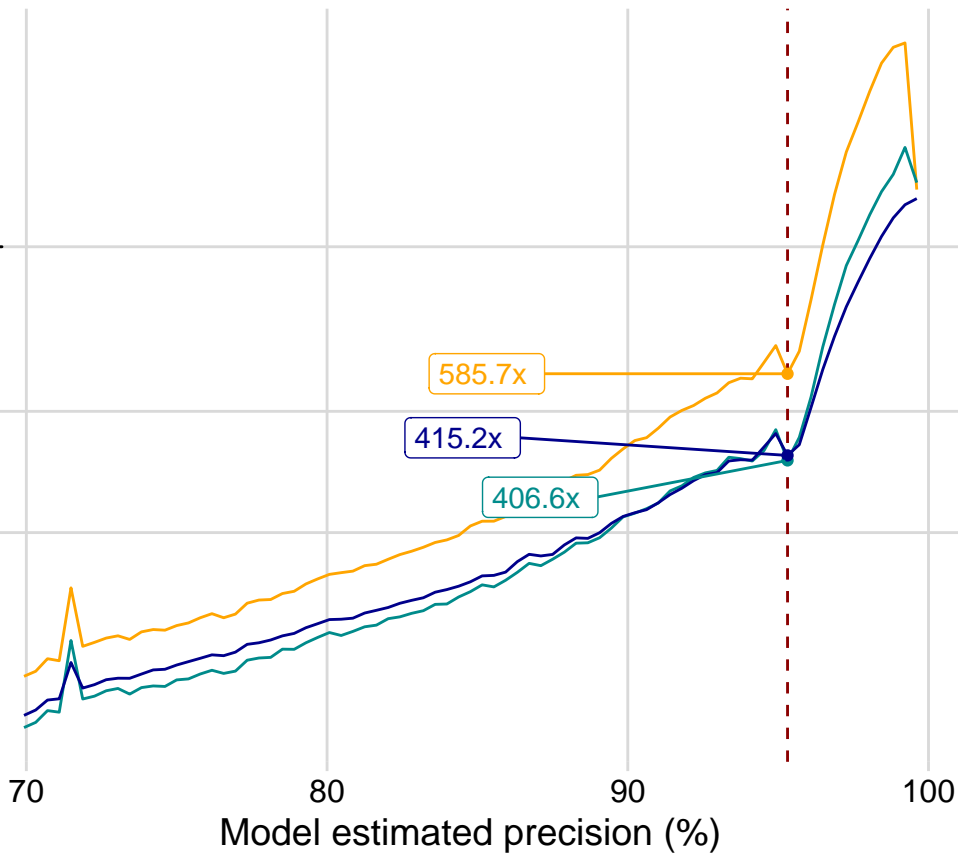

Supplement: Supplemental_Code.zip [file motif-enrichment.pdf › Fiber-m6A-figures-and-tables-0.0.1/Figures/motif-enrichment.pdf]

—●— % of motifs covered by m6A —●— % of m6A events in motifs —●— Expected % of m6A events in motifs

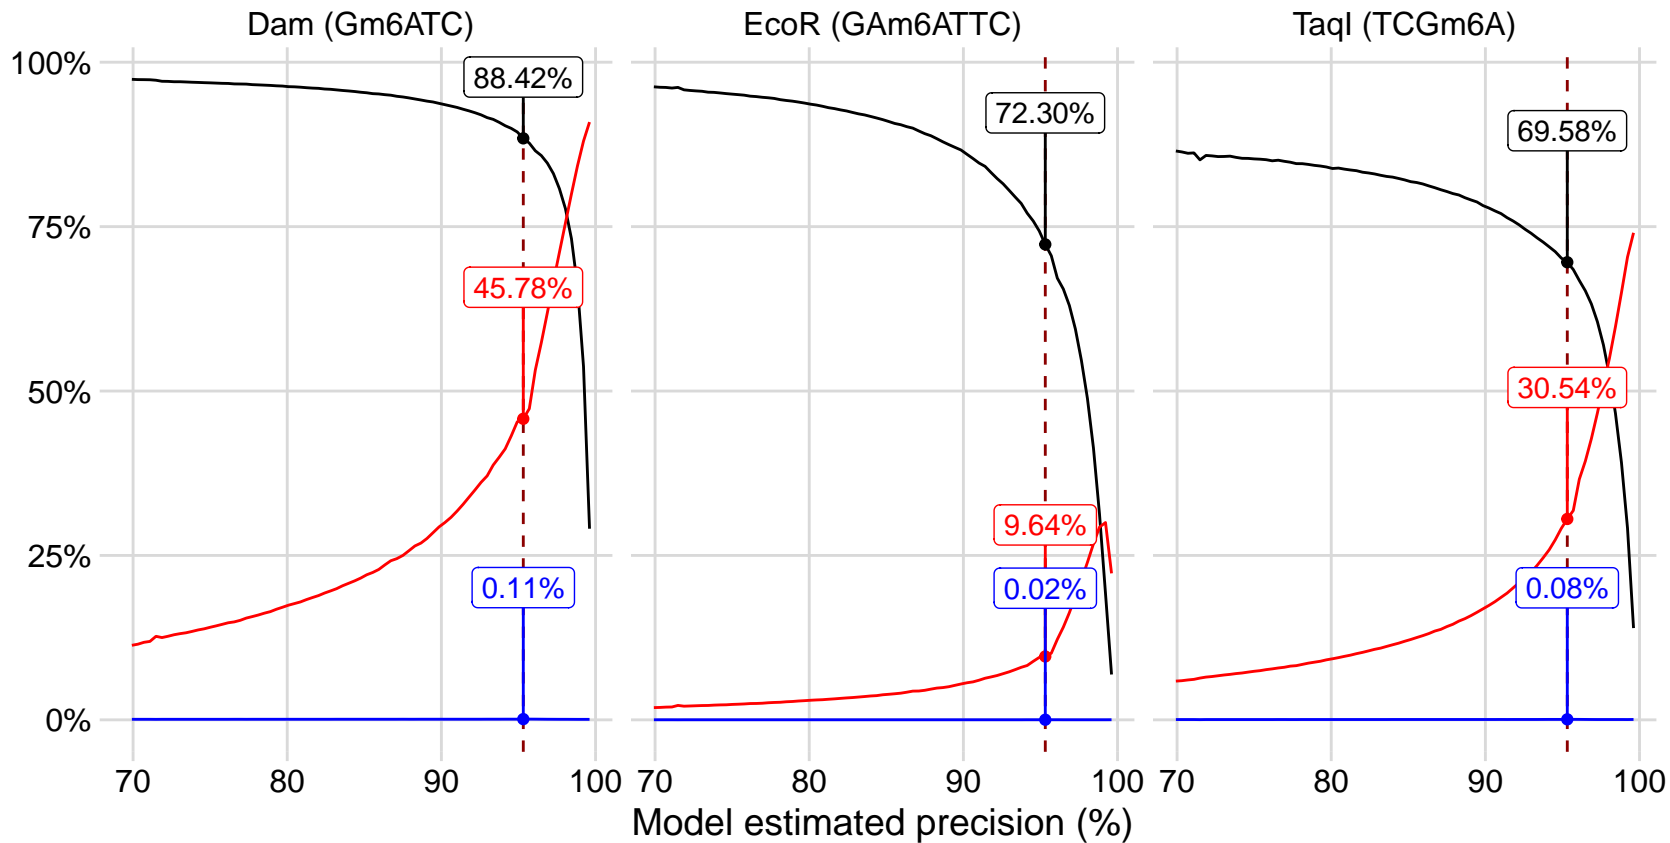

Supplement: Supplemental_Code.zip [file motifs.pdf › Fiber-m6A-figures-and-tables-0.0.1/Figures/motifs.pdf]

- % of motifs covered by m6A
- % of m6A events in motifs

GATC

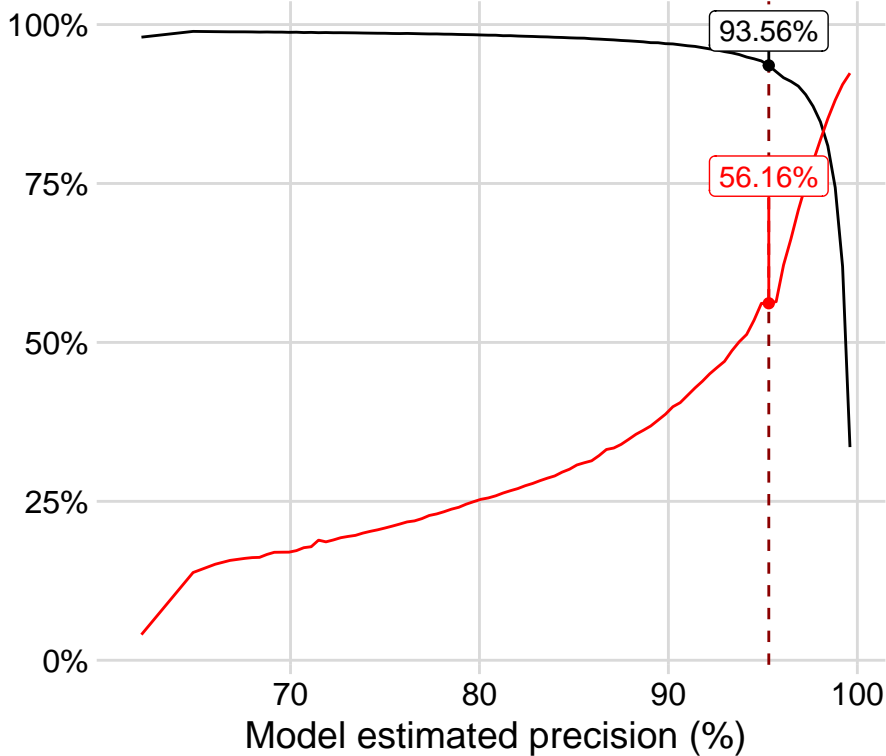

Supplement: Supplemental_Code.zip [file motifs_plasmid.pdf › Fiber-m6A-figures-and-tables-0.0.1/Figures/motifs_plasmid.pdf]

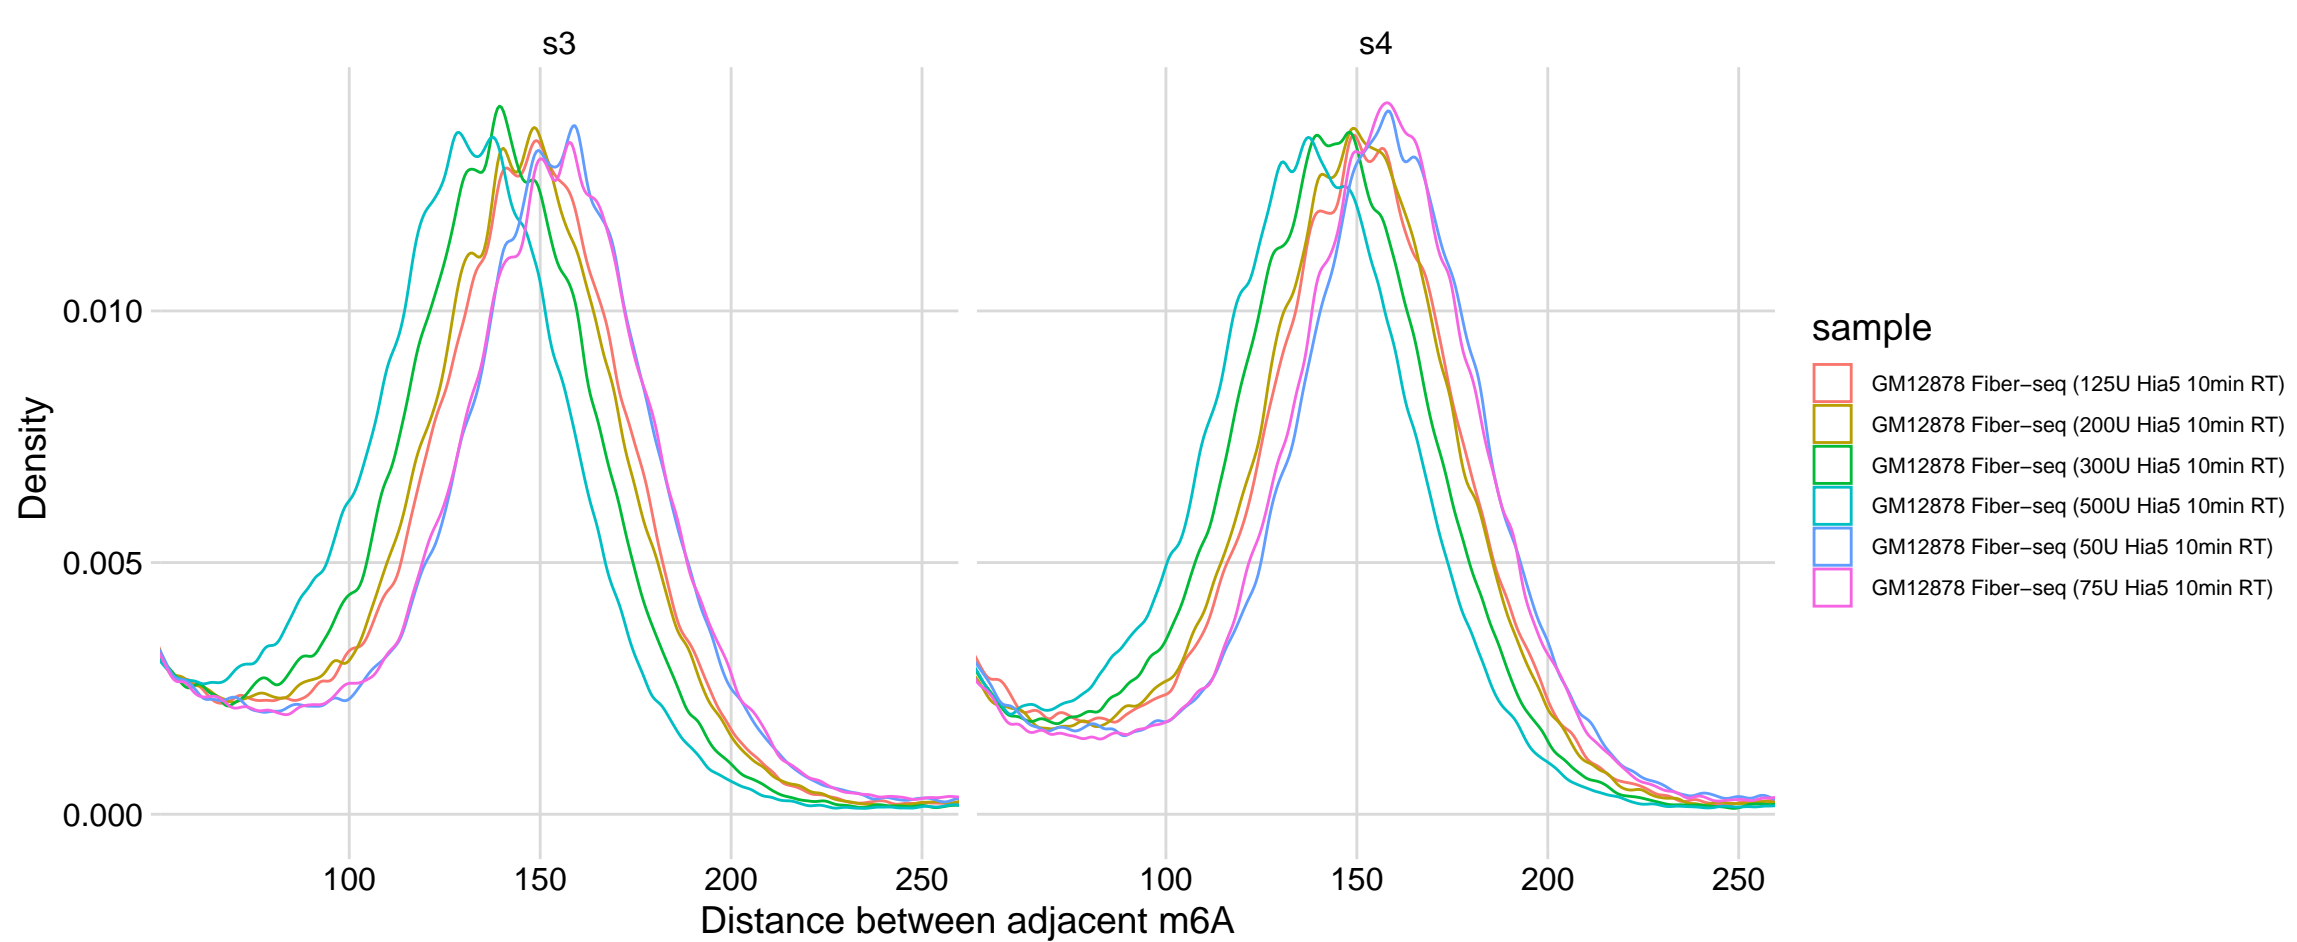

Supplement: Supplemental_Code.zip [file pre-revio-train.pdf › Fiber-m6A-figures-and-tables-0.0.1/Figures/pre-revio-train.pdf]

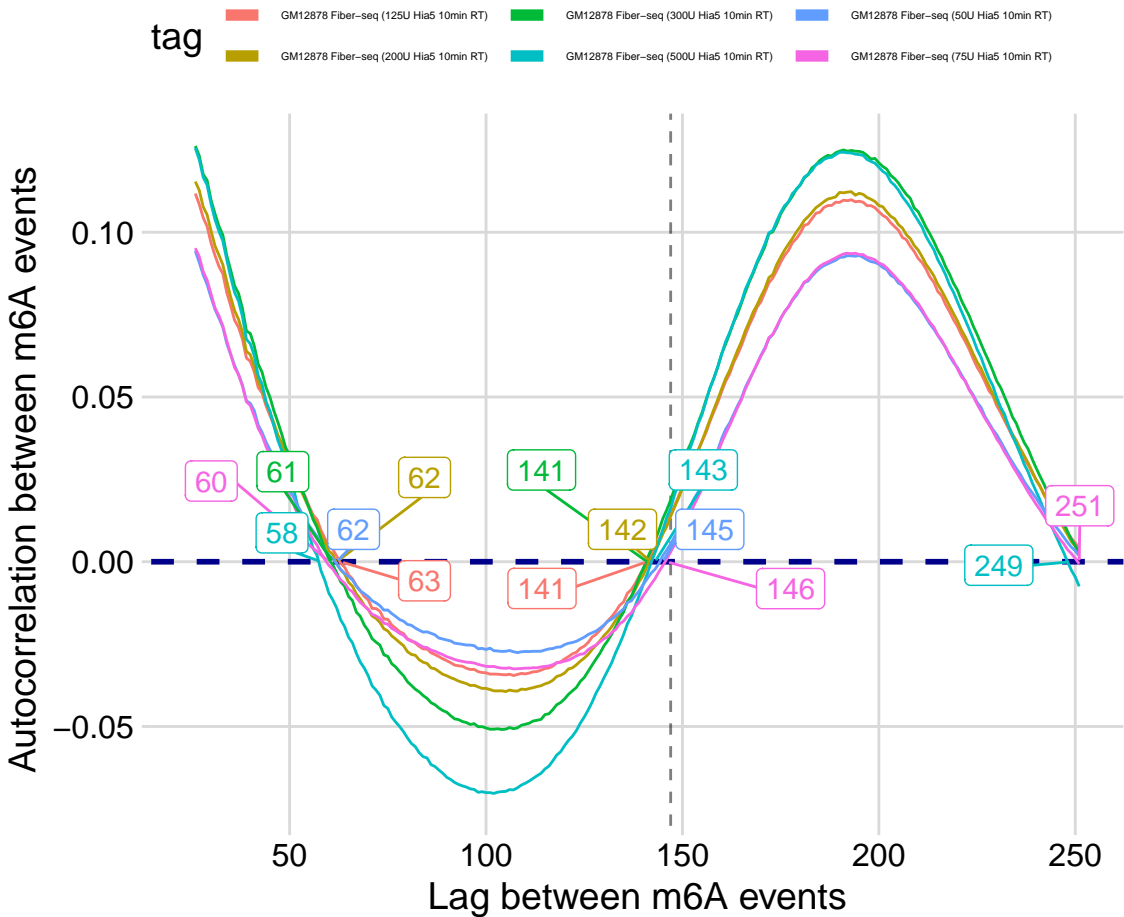

Supplement: Supplemental_Code.zip [file revio-autocorrelation-between-m6A.pdf › Fiber-m6A-figures-and-tables-0.0.1/Figures/revio-autocorrelation-between-m6A.pdf]

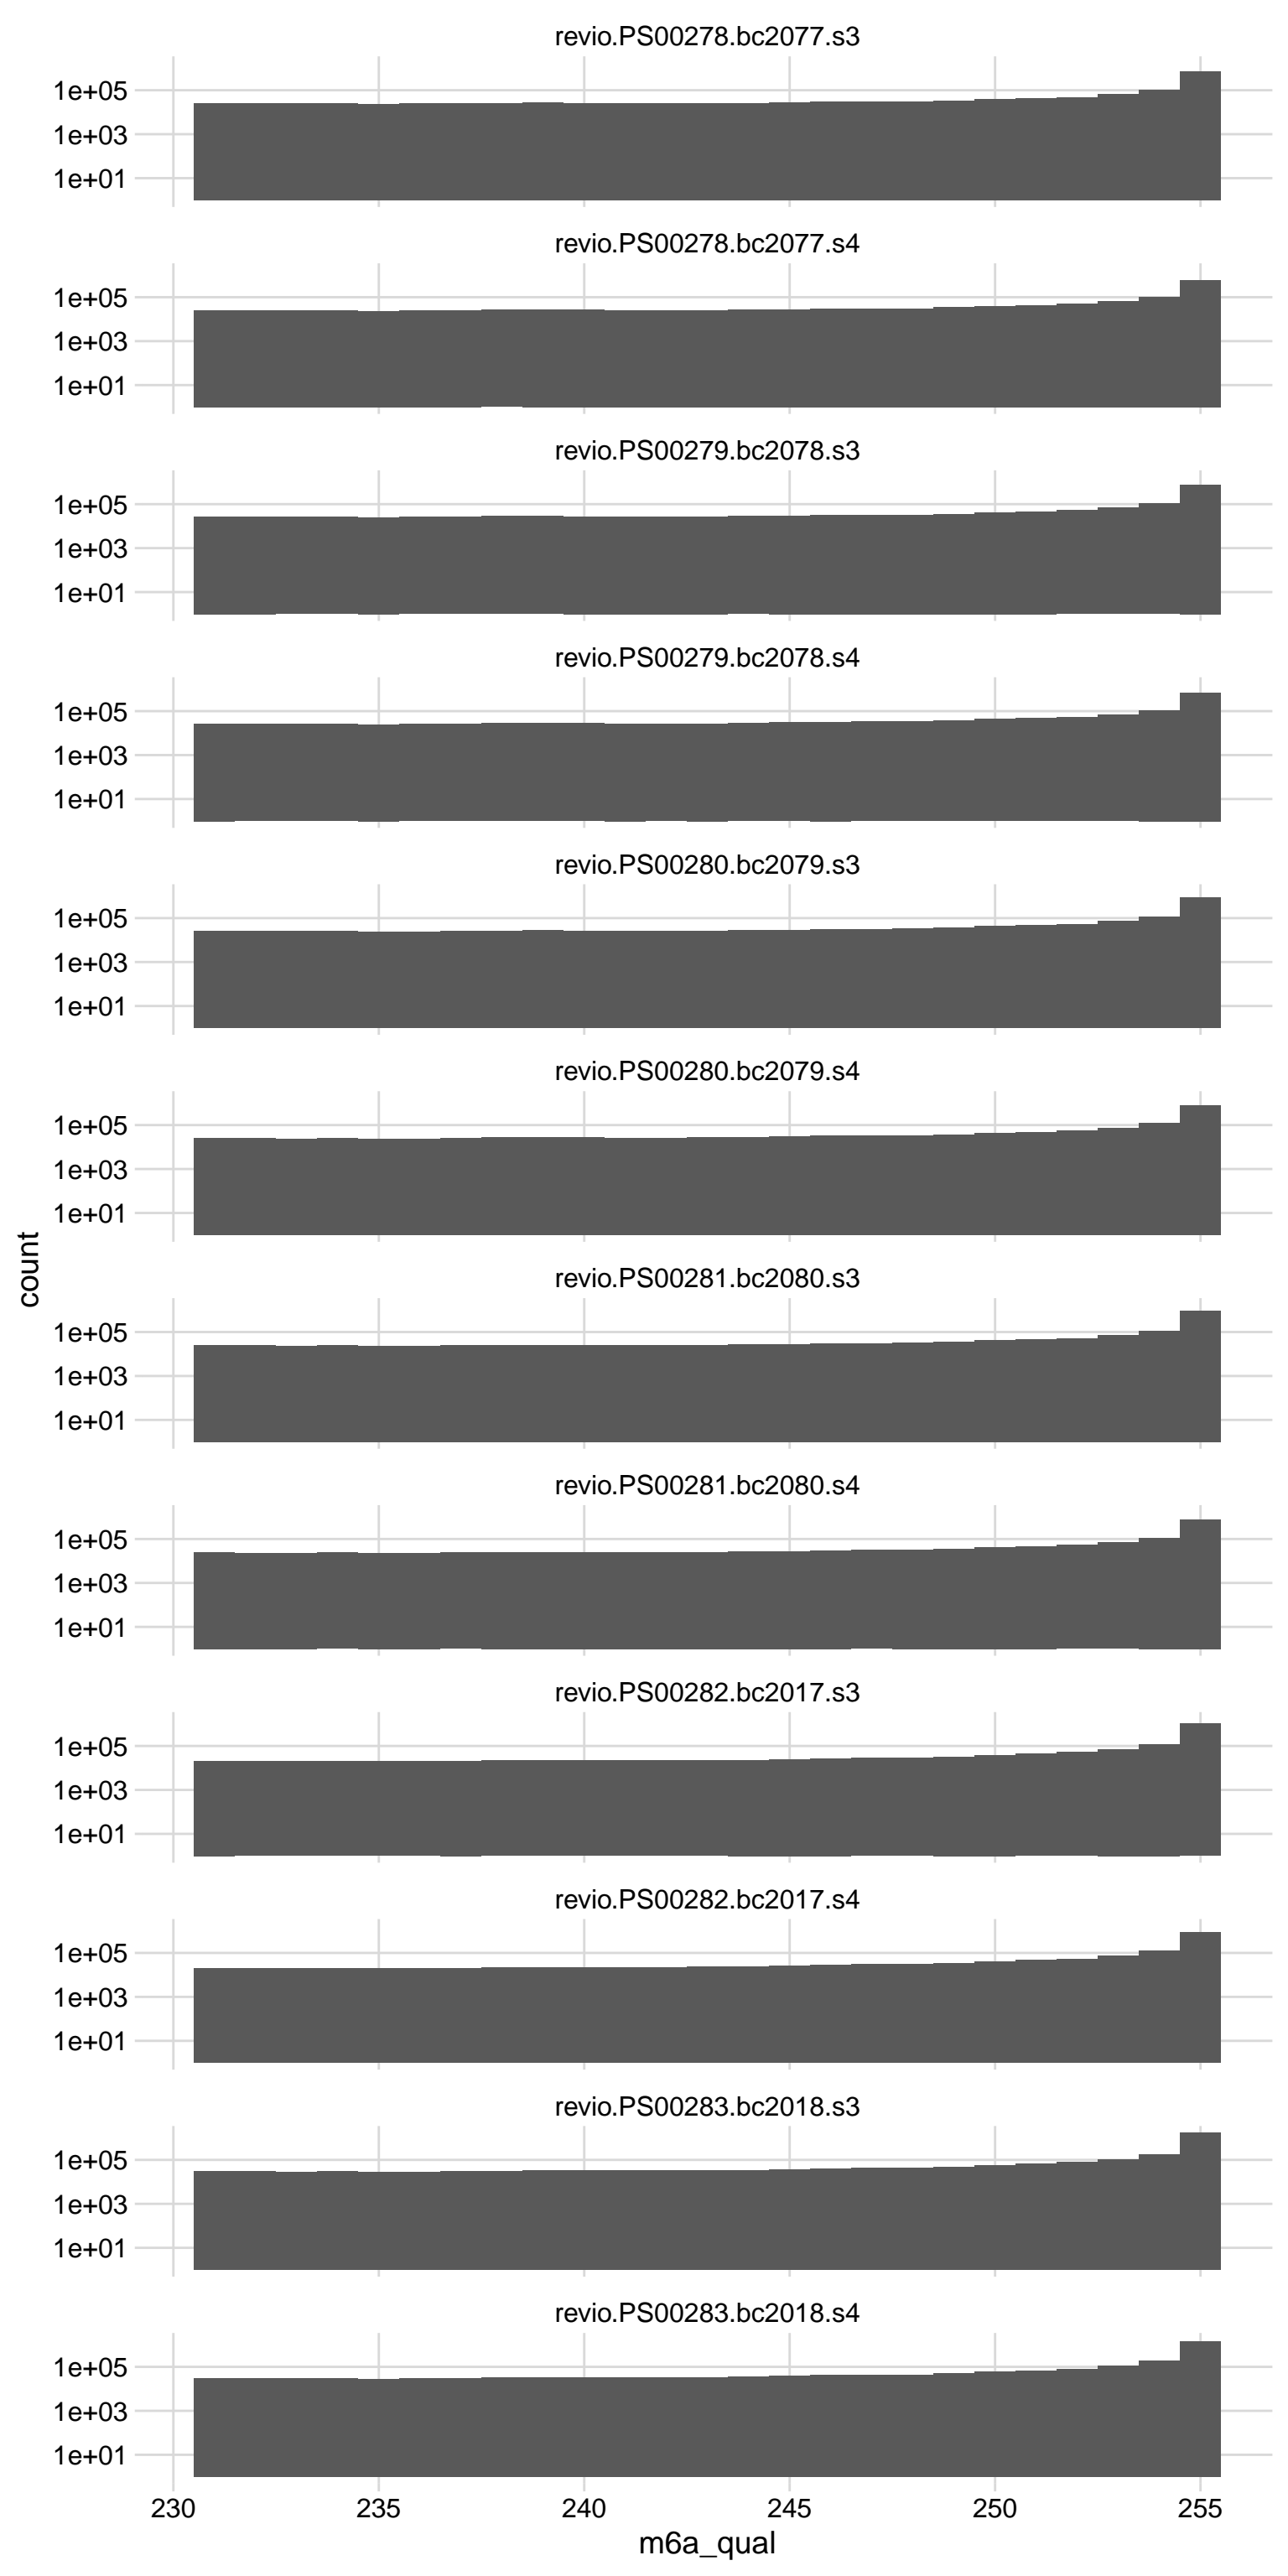

Supplement: Supplemental_Code.zip [file revio-m6a-qual-hist.pdf › Fiber-m6A-figures-and-tables-0.0.1/Figures/revio-m6a-qual-hist.pdf]

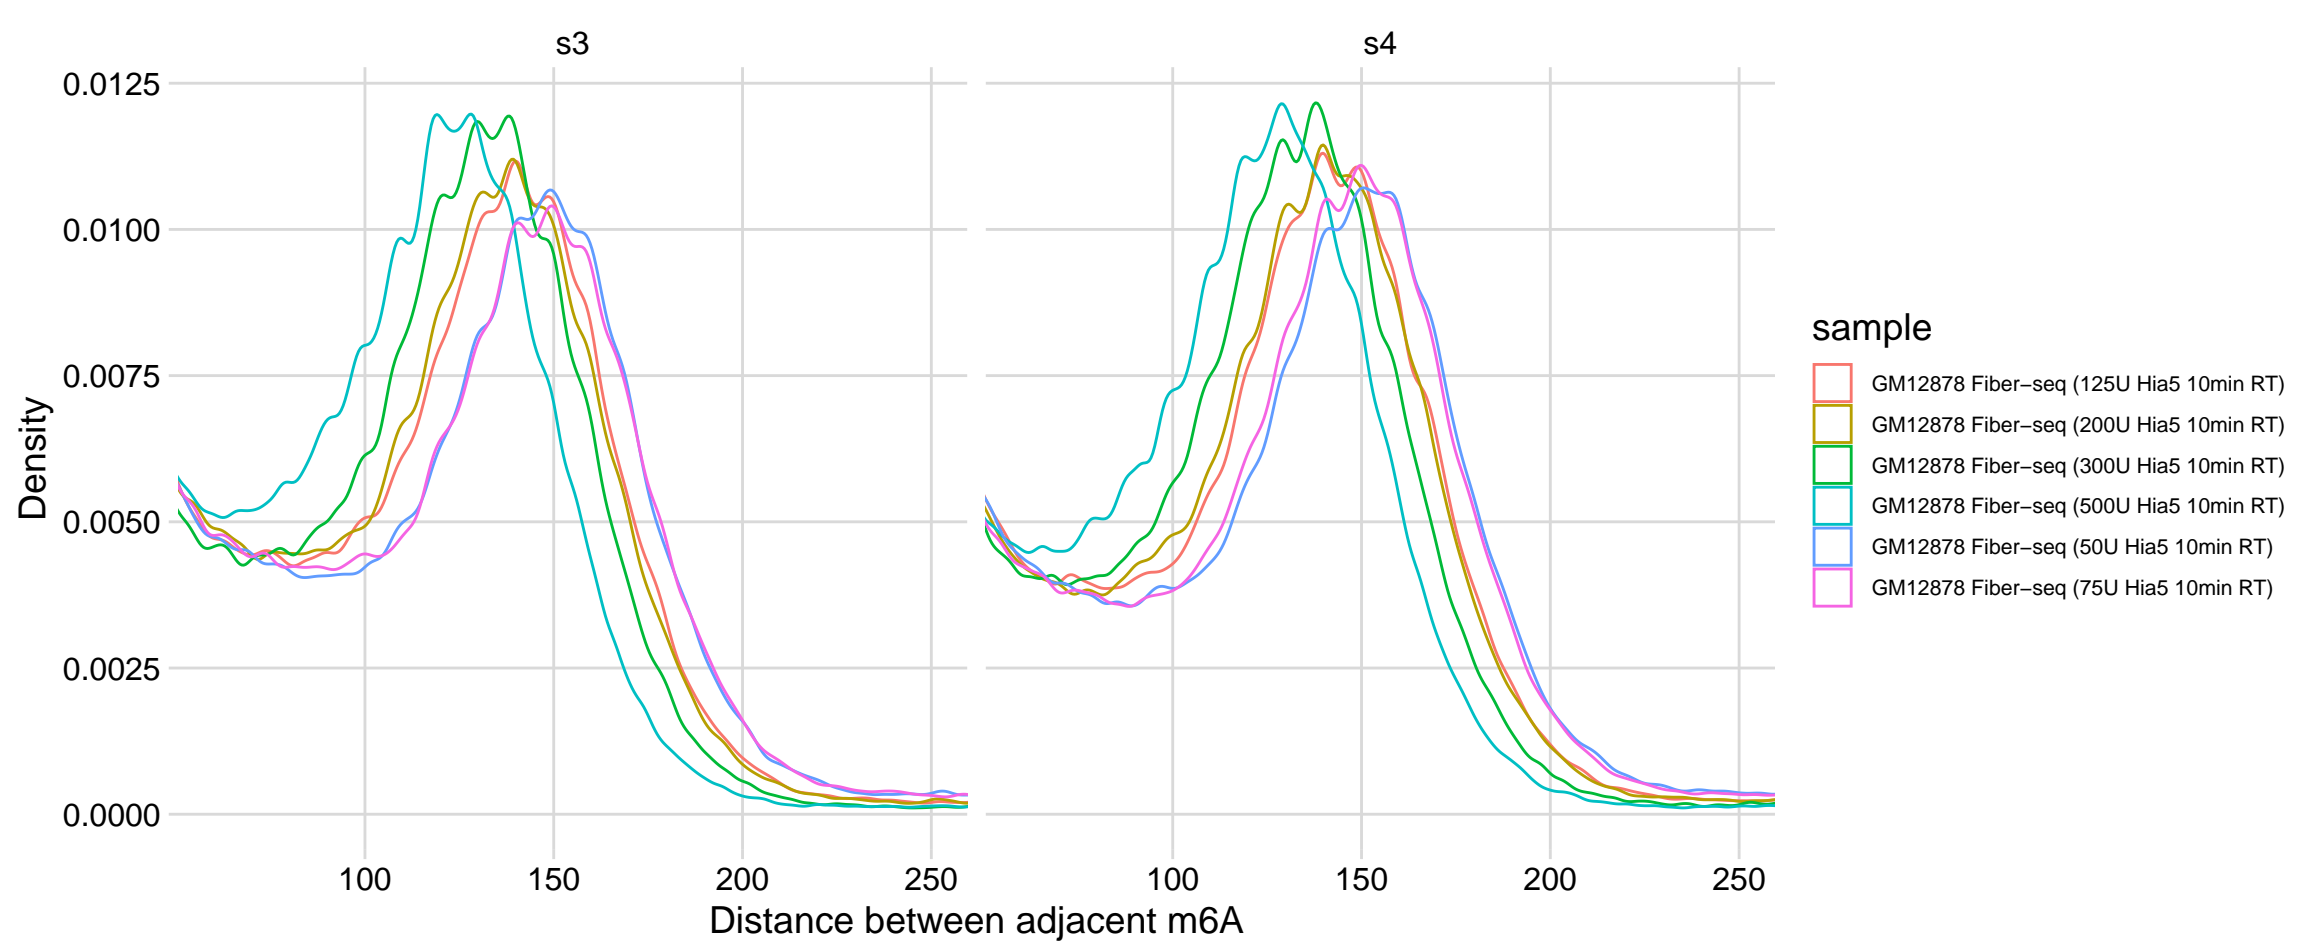

Supplement: Supplemental_Code.zip [file revio-train.pdf › Fiber-m6A-figures-and-tables-0.0.1/Figures/revio-train.pdf]

Runtime for m6A calling  
(CPU hours)

10,000

1,000

100

10

fibertools

ipdSummary

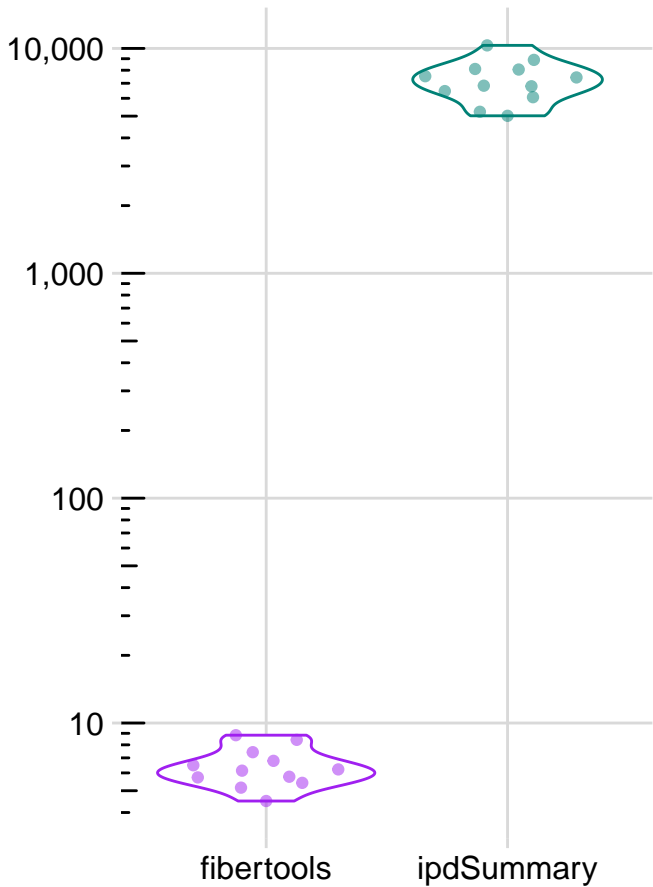

Supplement: Supplemental_Code.zip [file run-time-comparison.2.pdf › Fiber-m6A-figures-and-tables-0.0.1/Figures/run-time-comparison.2.pdf]

Runtime for m6A calling  
(CPU hours)

● fibertools ● Subread pipeline

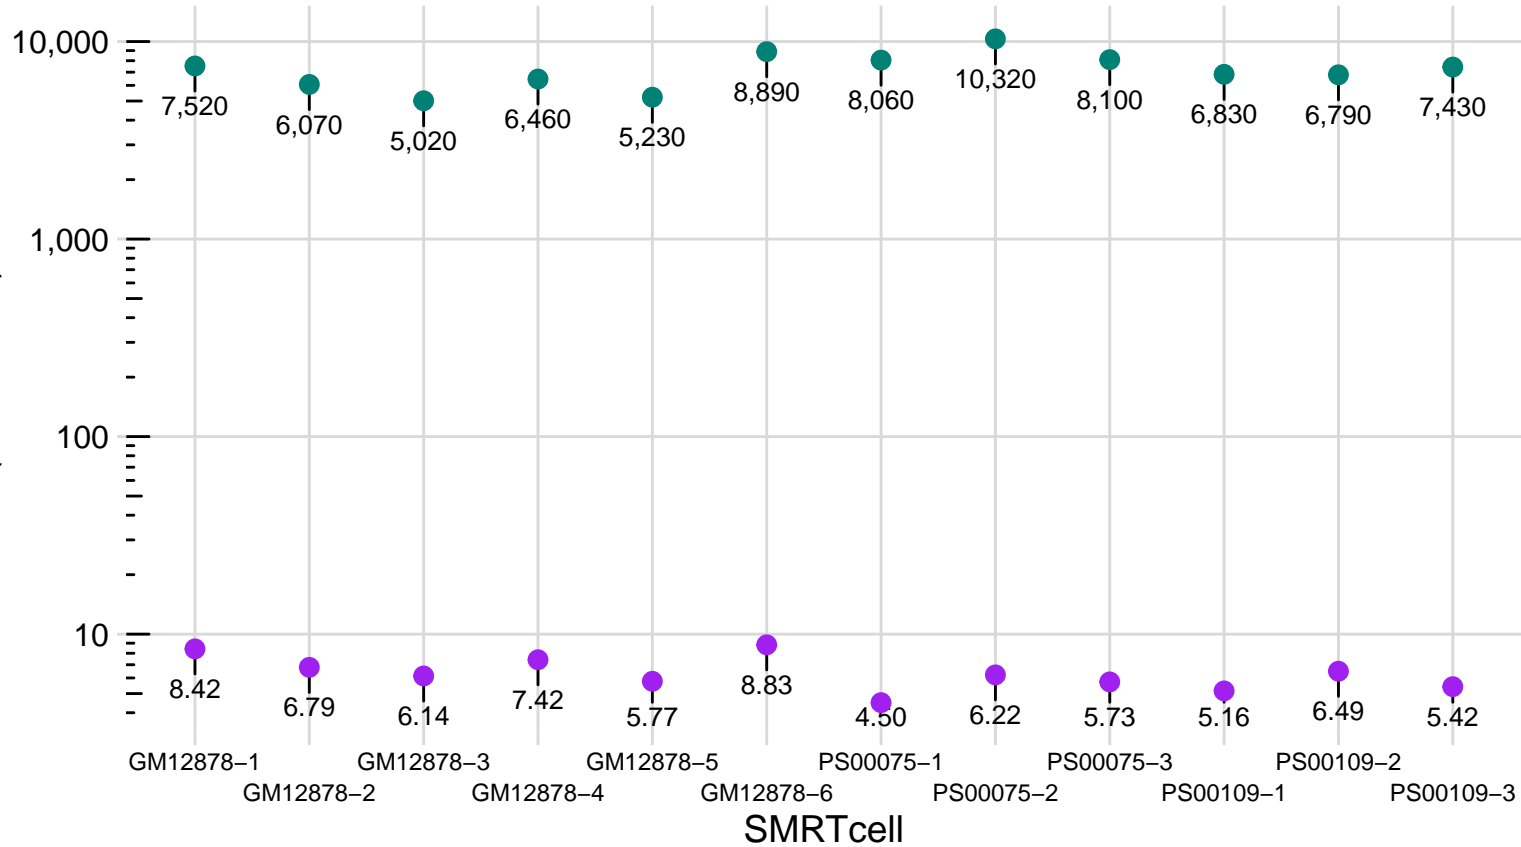

Supplement: Supplemental_Code.zip [file run-time-comparison.pdf › Fiber-m6A-figures-and-tables-0.0.1/Figures/run-time-comparison.pdf]

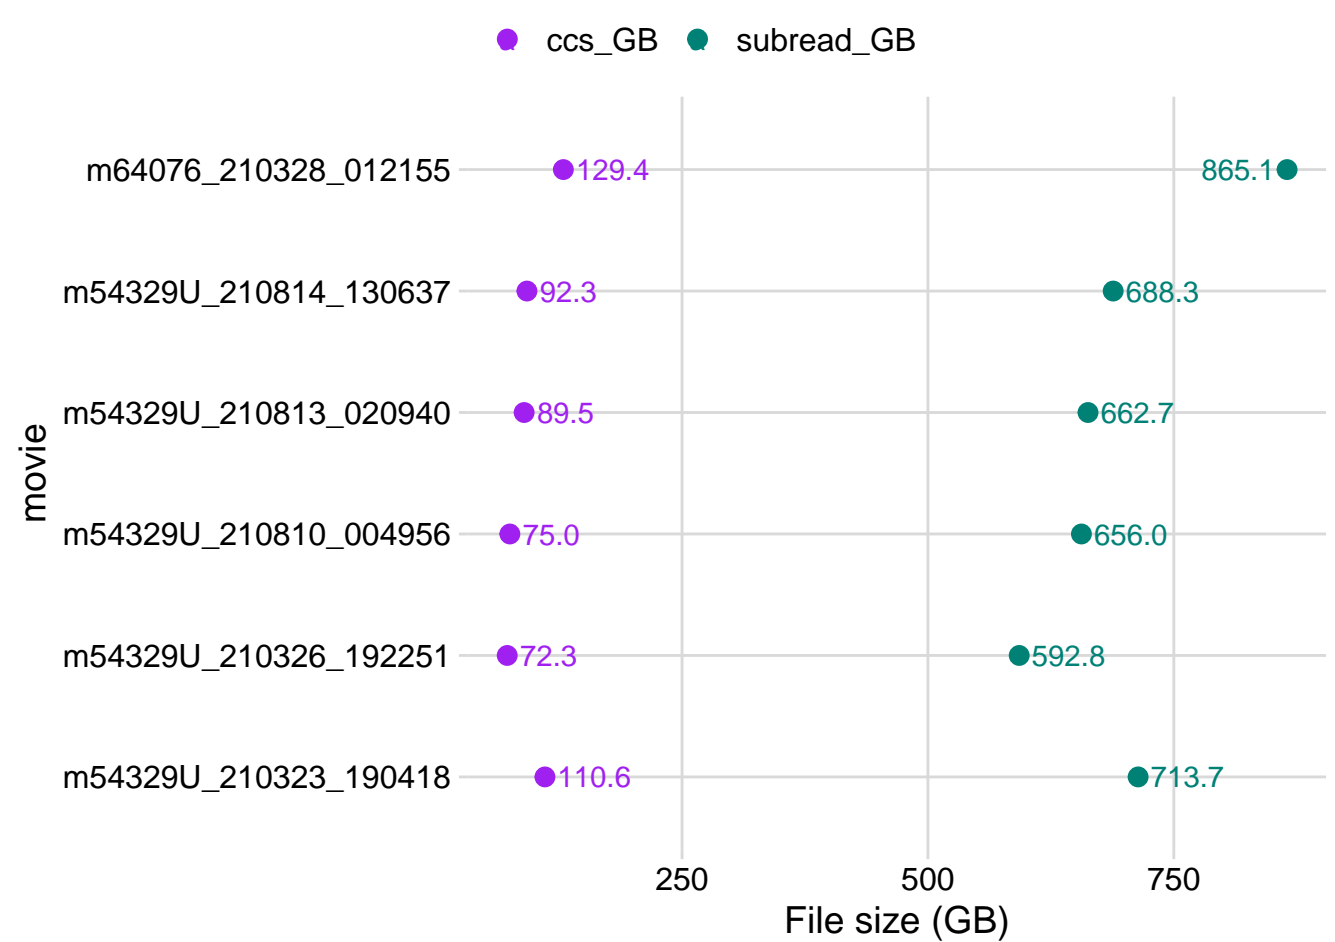

Supplement: Supplemental_Code.zip [file subread-vs-ccs-size.pdf › Fiber-m6A-figures-and-tables-0.0.1/Figures/subread-vs-ccs-size.pdf]

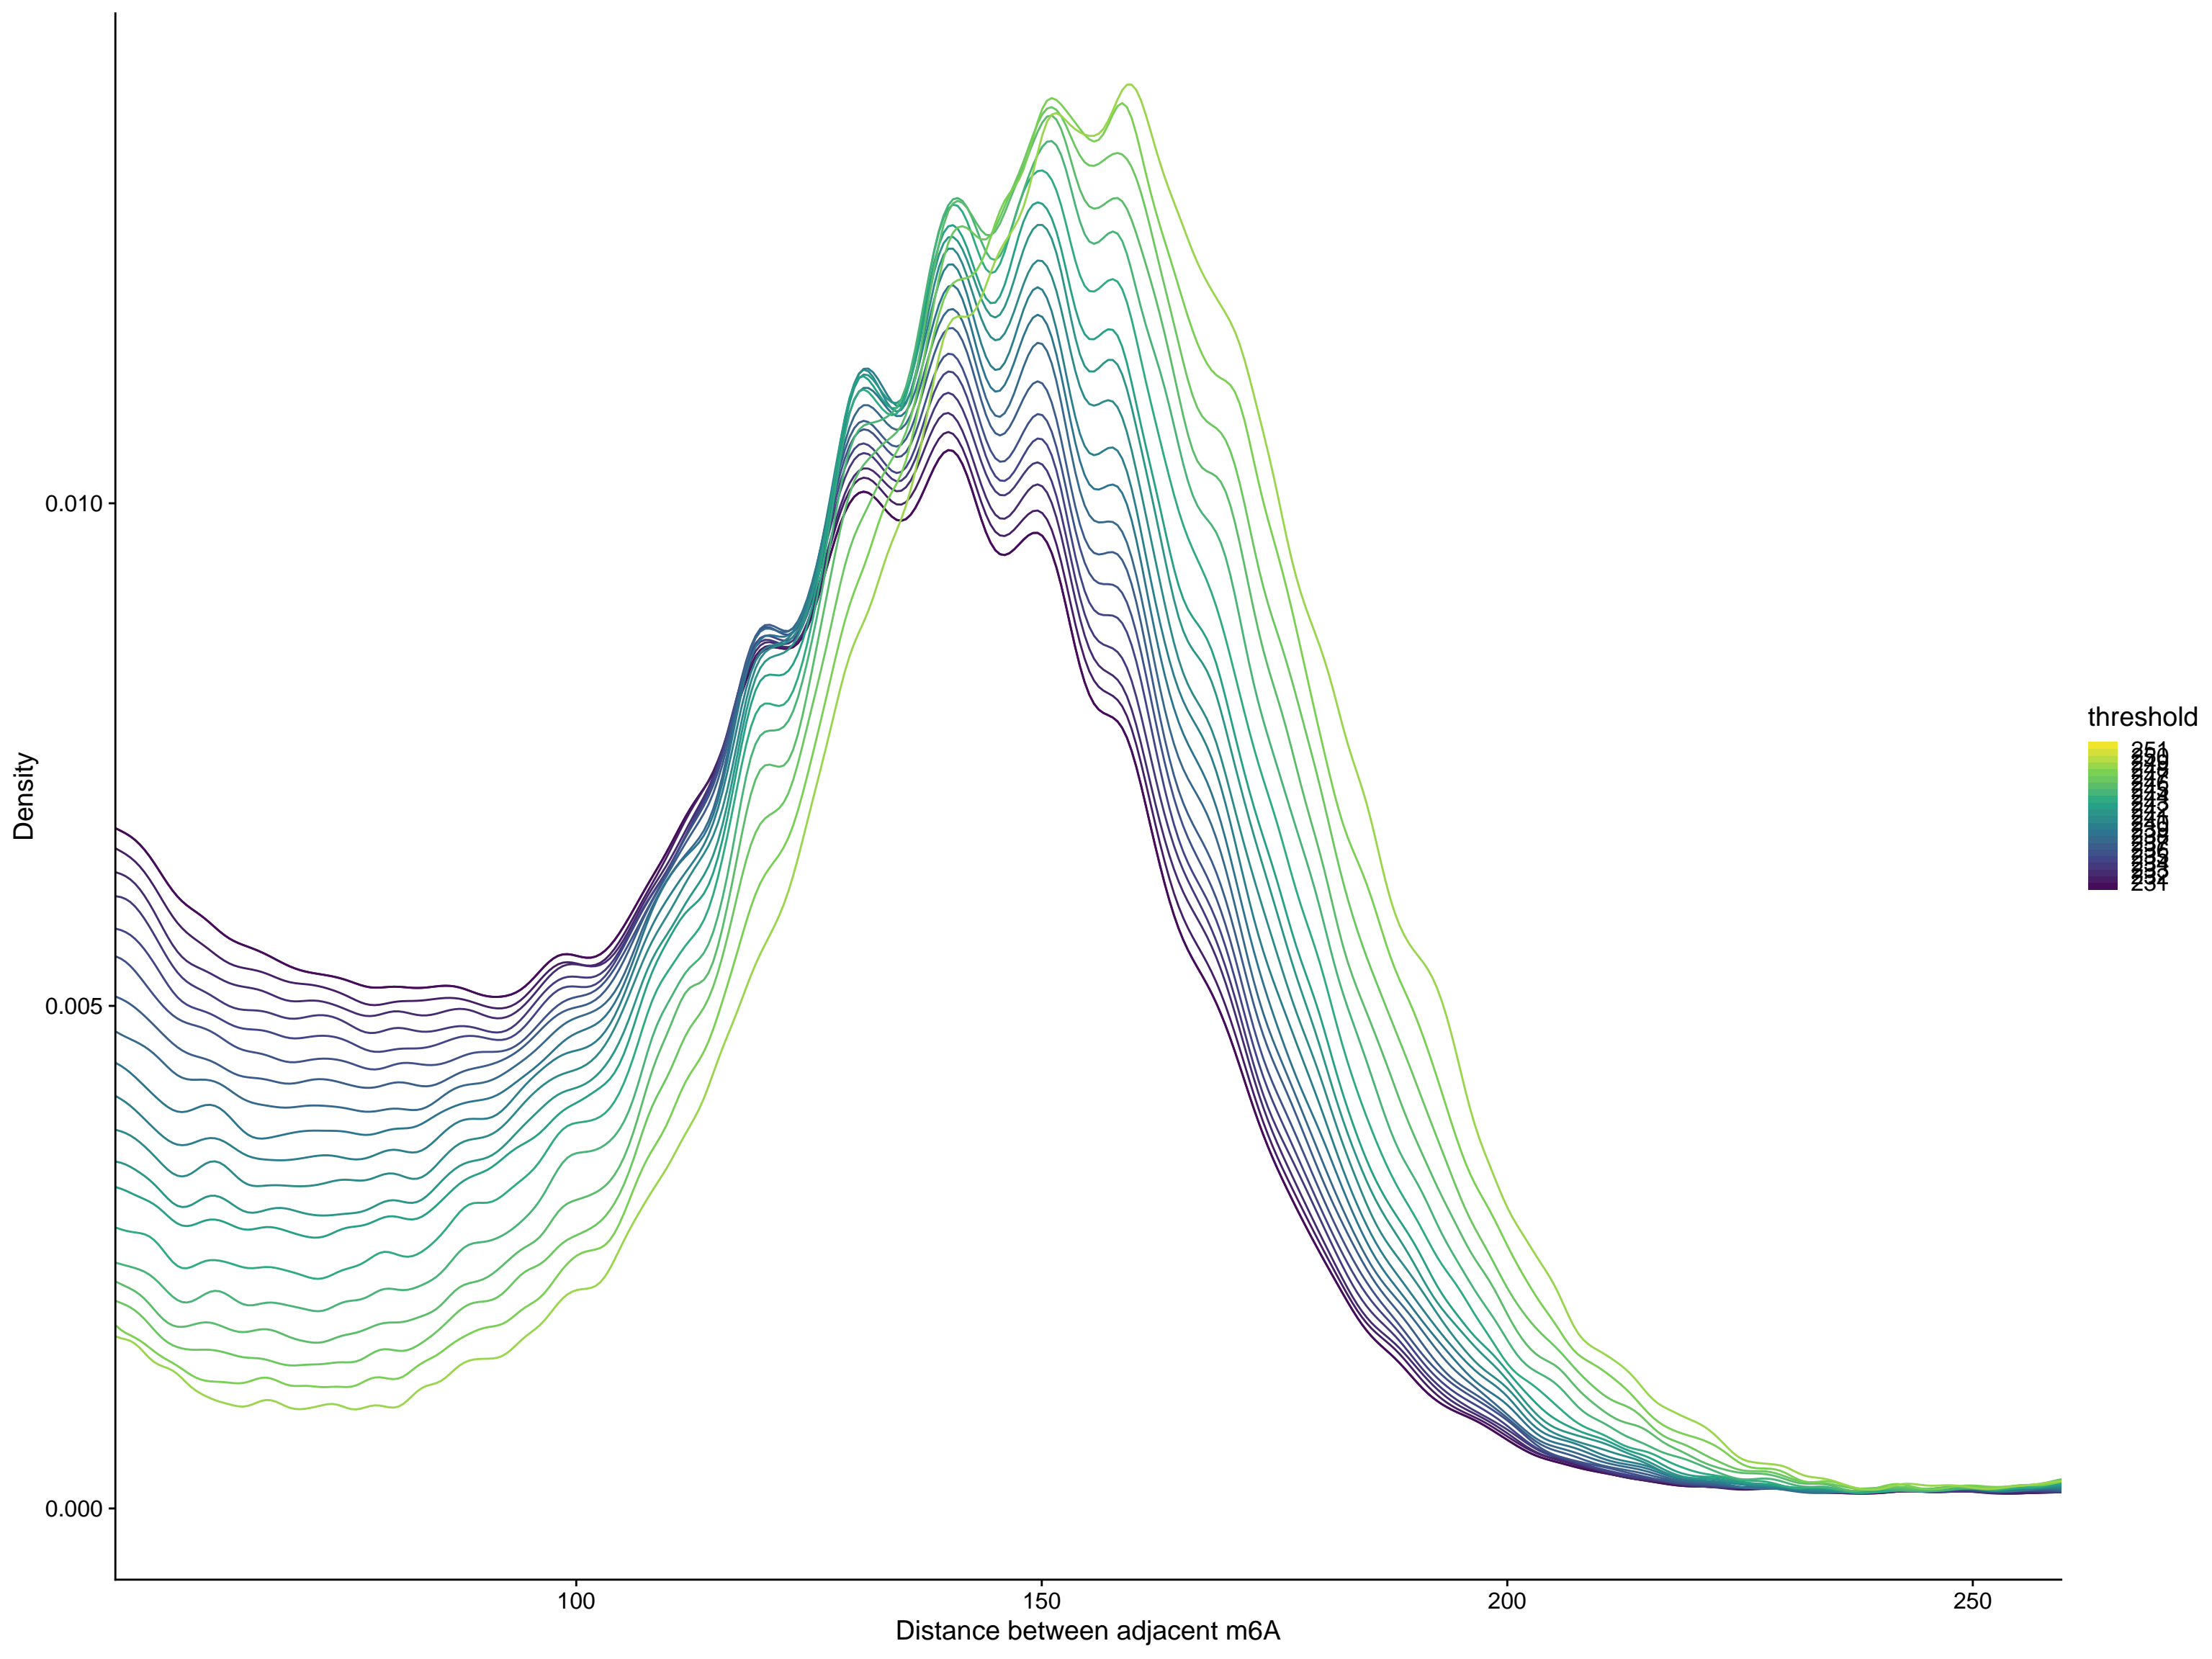

Supplement: Supplemental_Code.zip [file GM12878-distance-between-adjacent-m6A.pdf › Fiber-m6A-figures-and-tables-0.0.1/Figures/threshold_choice/GM12878-distance-between-adjacent-m6A.pdf]

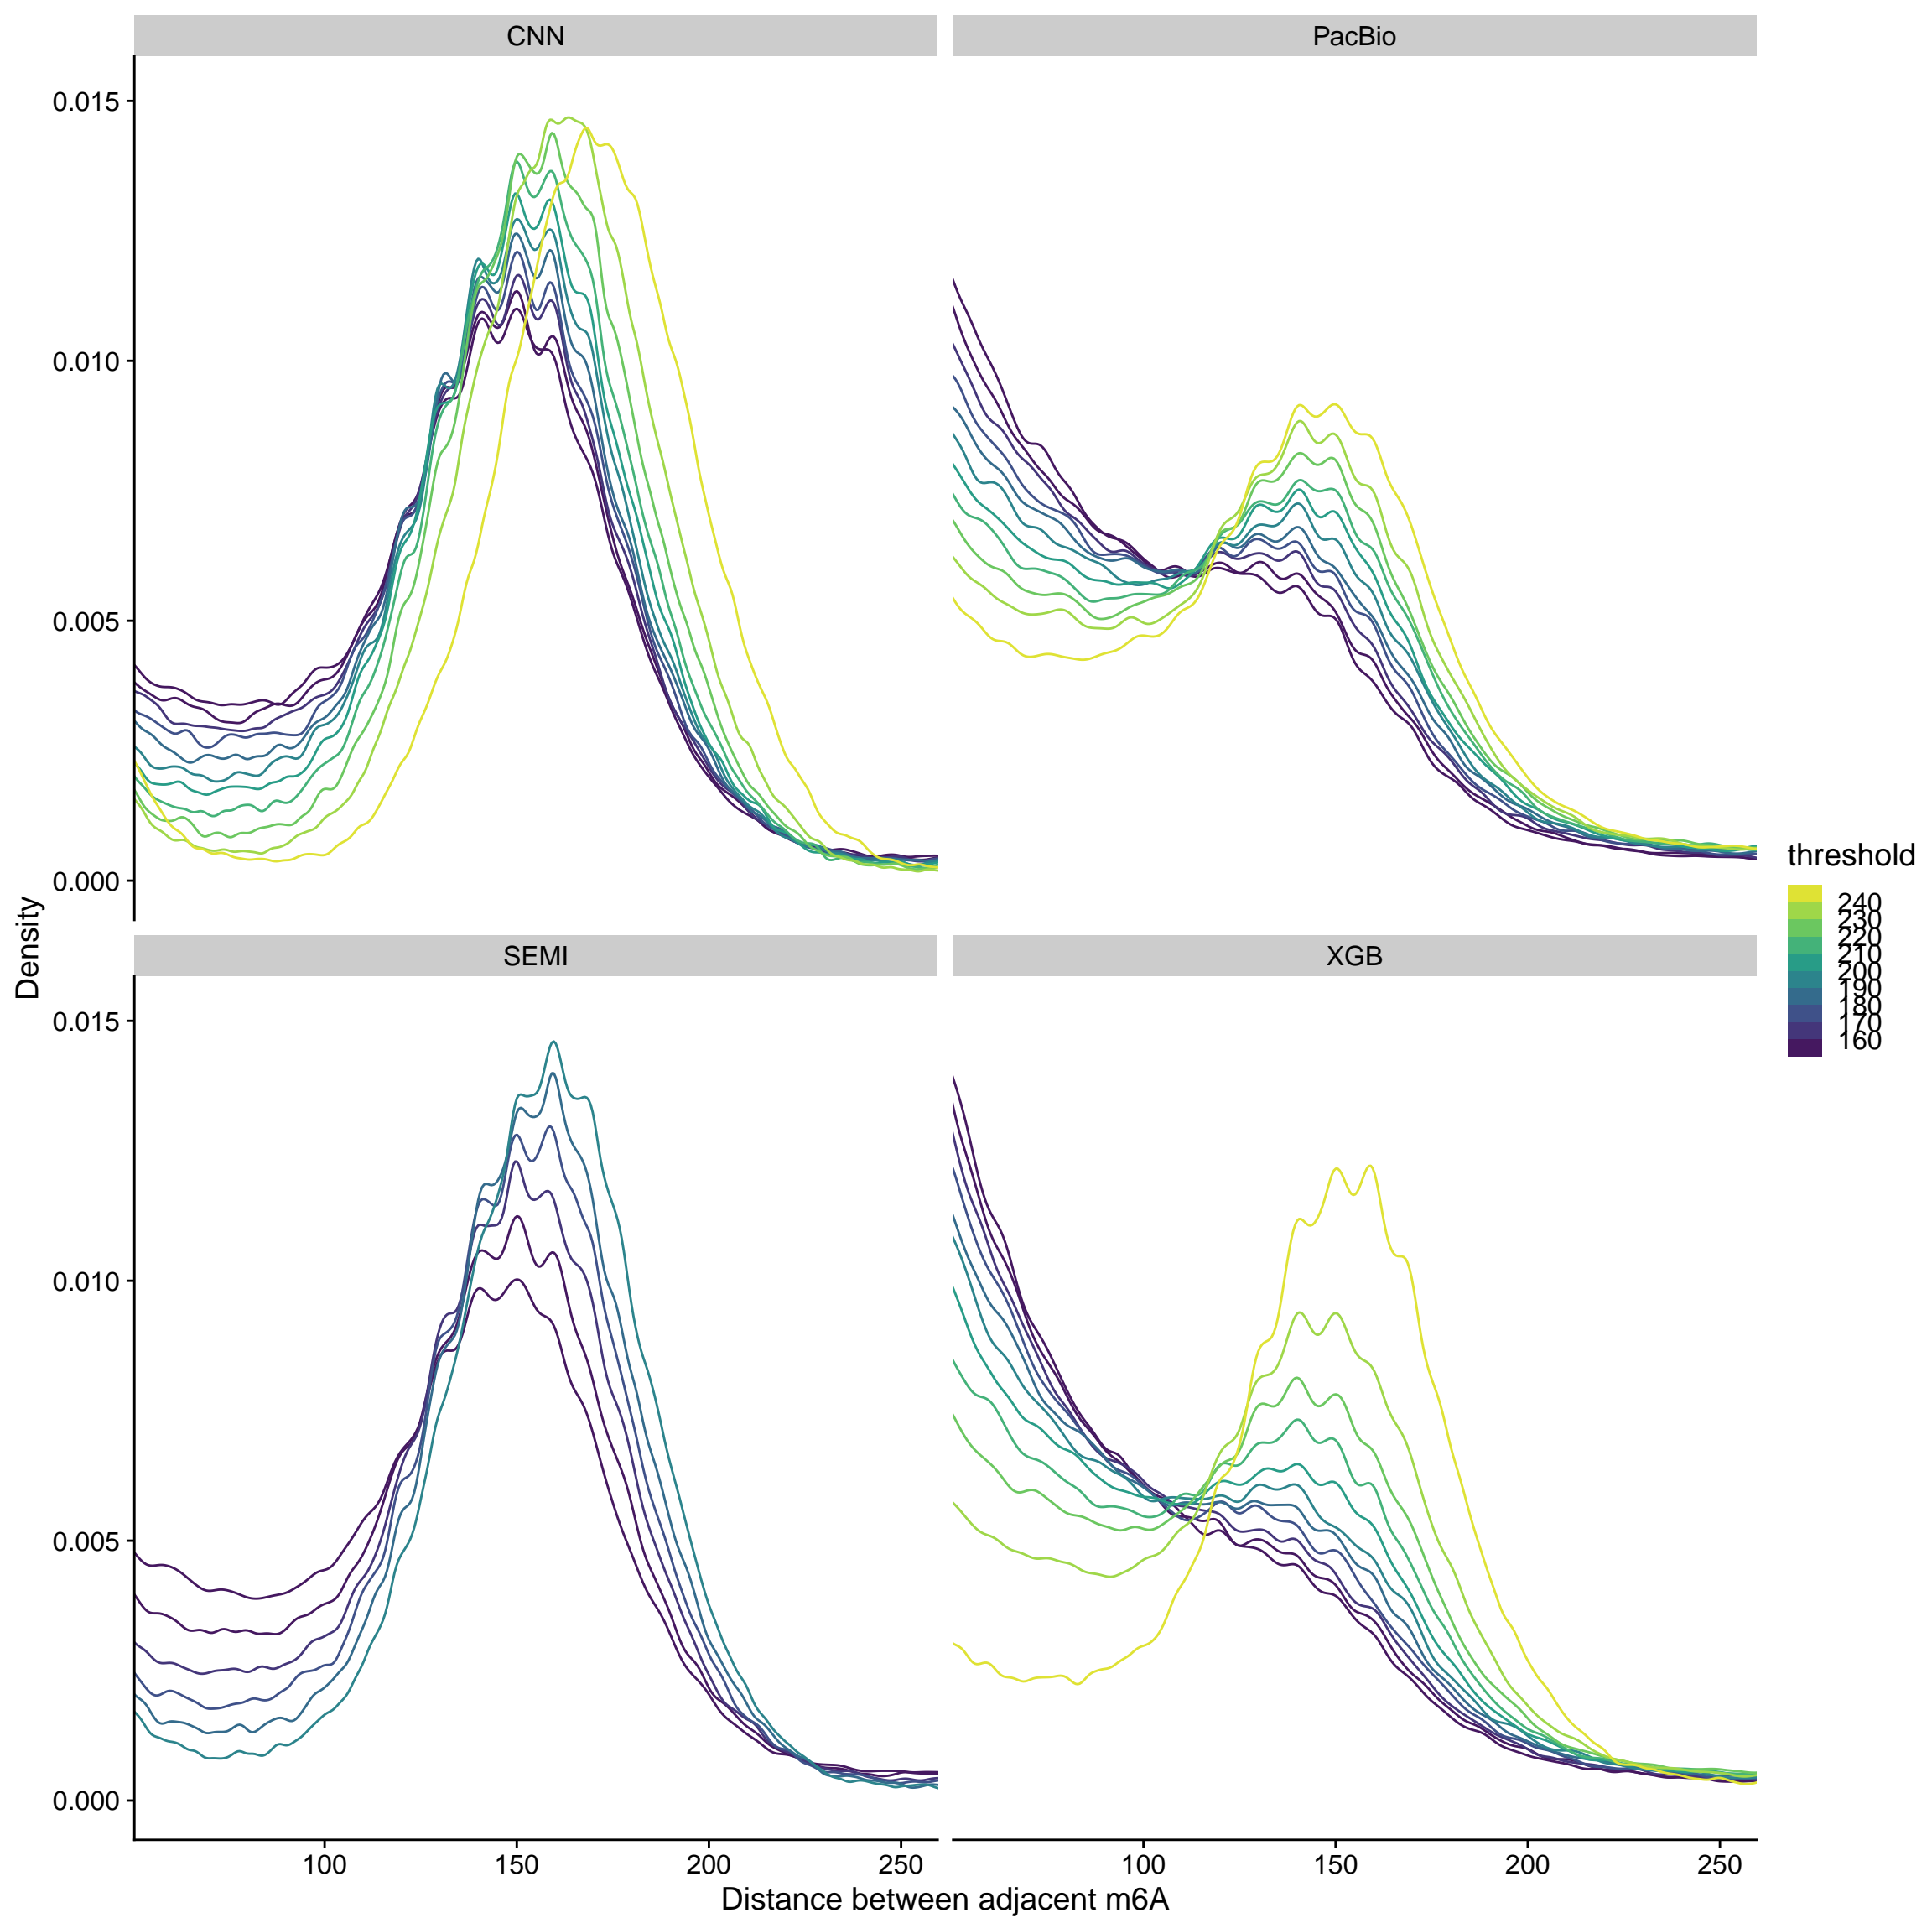

Supplement: Supplemental_Code.zip [file PS00075_1-distance-between-adjacent-m6A.pdf › Fiber-m6A-figures-and-tables-0.0.1/Figures/threshold_choice/PS00075_1-distance-between-adjacent-m6A.pdf]

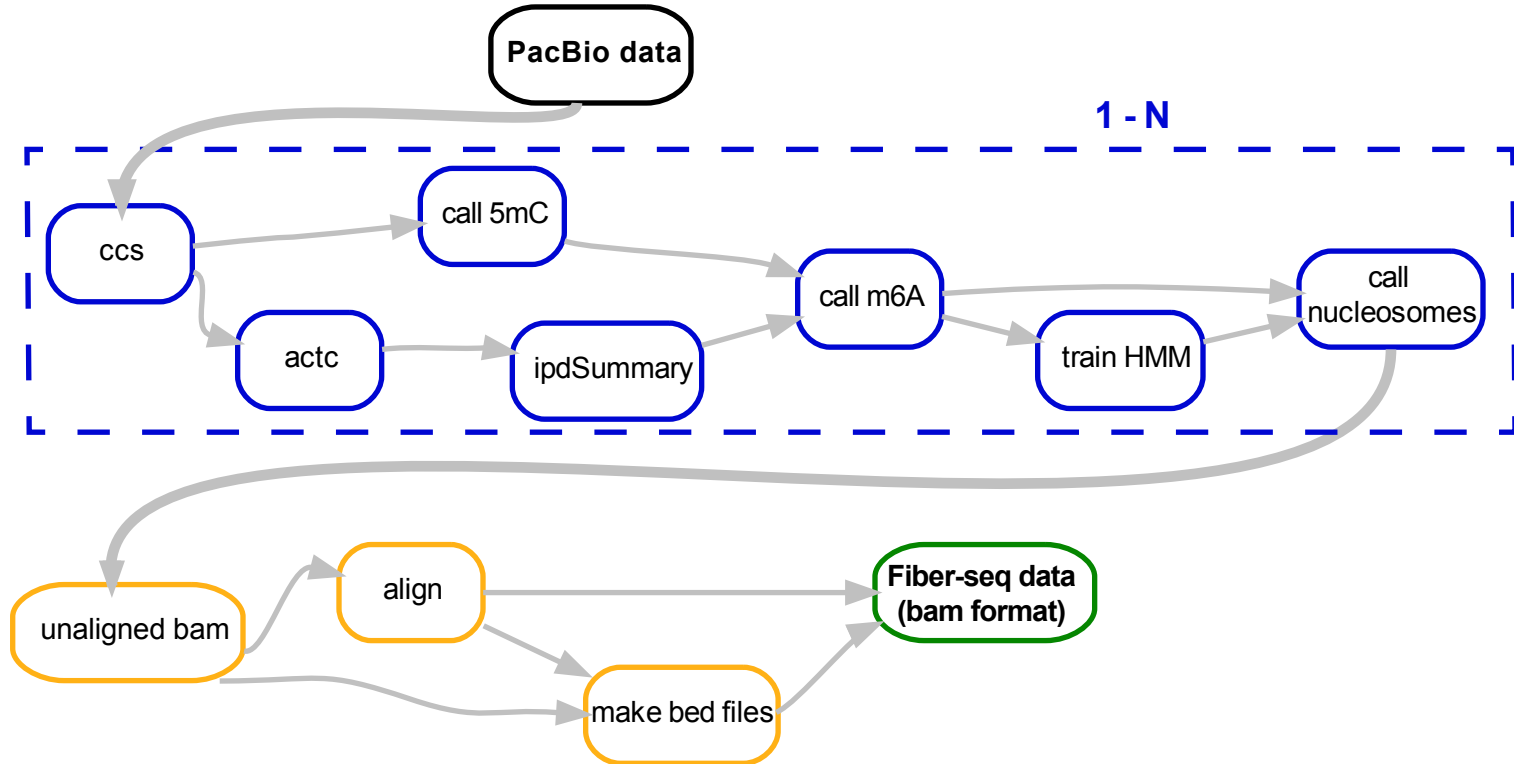

Supplement: Supplemental_Code.zip [file dag.pdf › fiberseq-smk/images/dag.pdf]

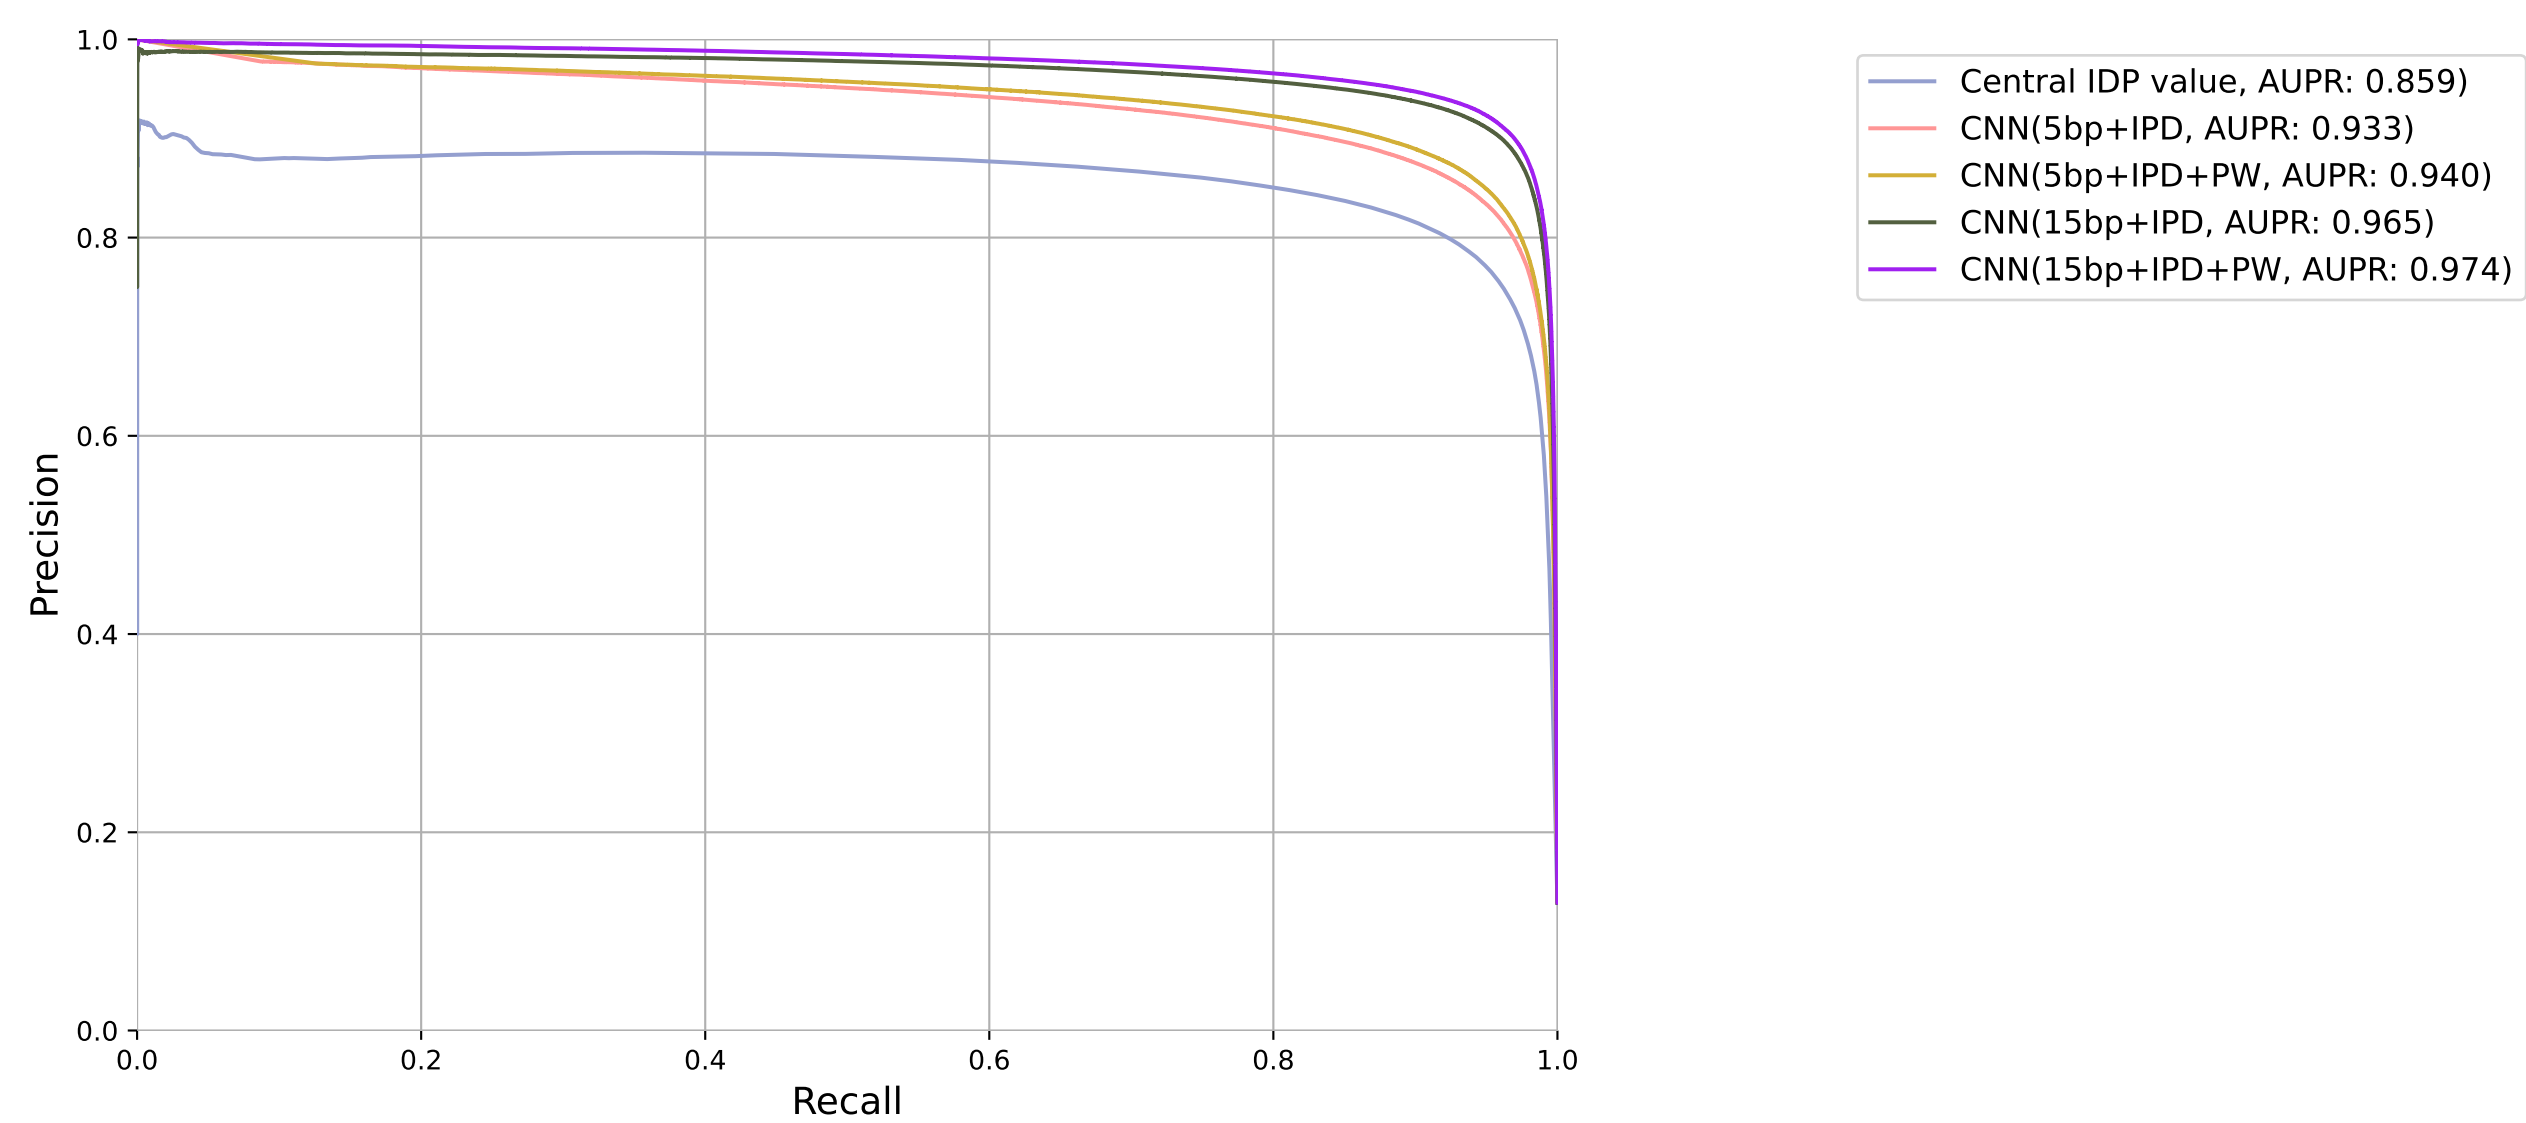

Supplement: Supplemental_Code.zip [file sup_variant_prs.pdf › train-m6A-calling-0.0.1/paper_v1/figures/sup_variant_prs.pdf]

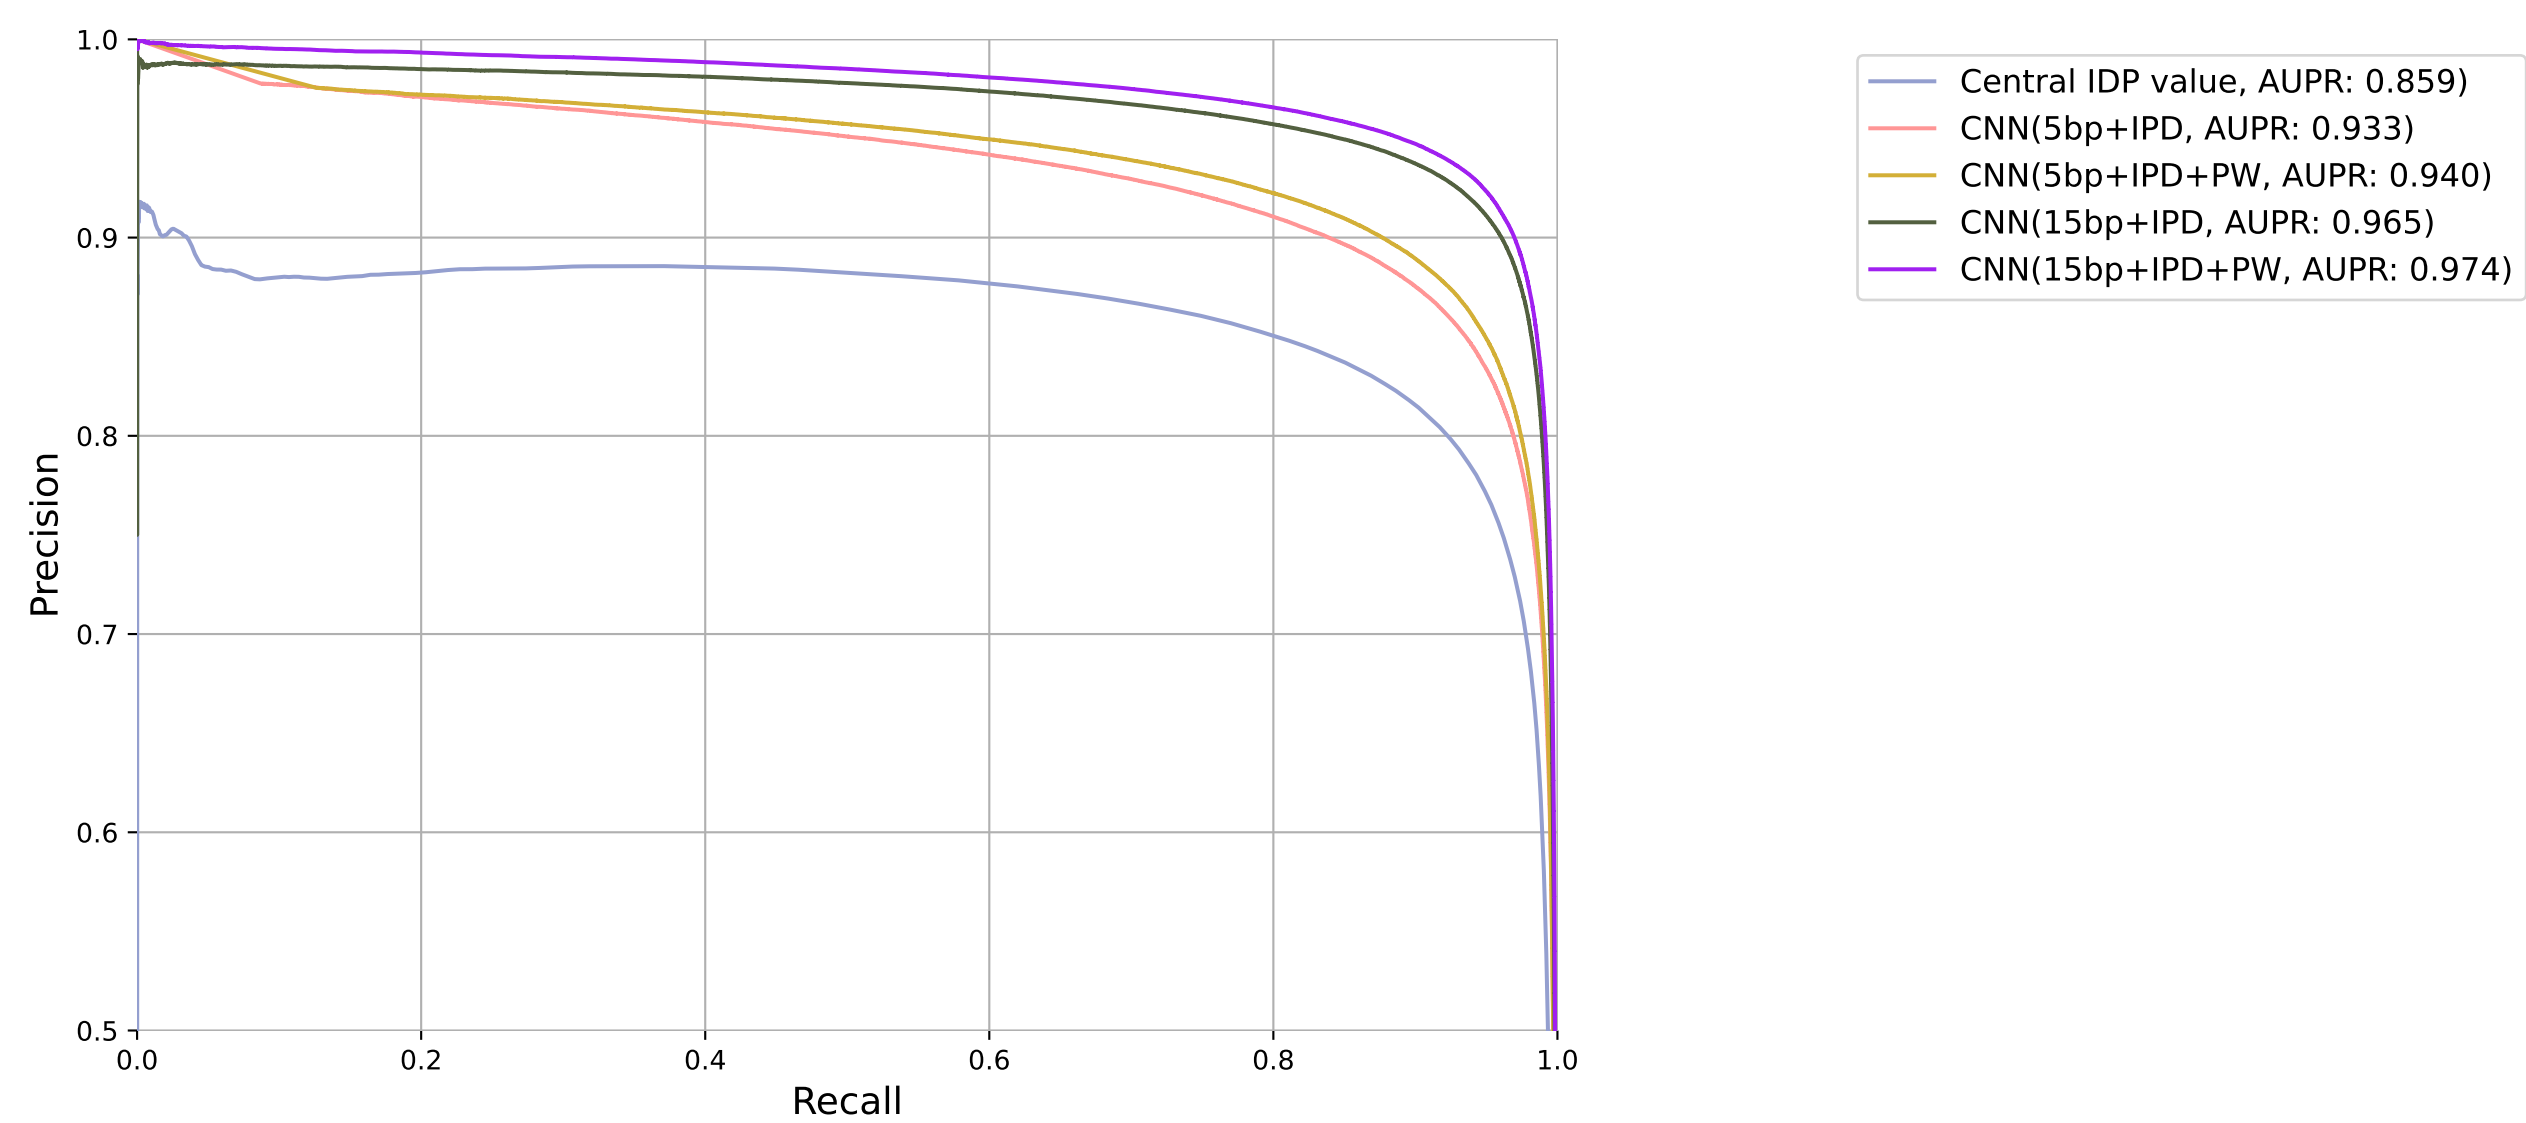

Supplement: Supplemental_Code.zip [file sup_variant_prs_subset.pdf › train-m6A-calling-0.0.1/paper_v1/figures/sup_variant_prs_subset.pdf]
